# Supplementary material for: Genome Mining and Molecular Networking-Based Metabolomics of the Marine Facultative Aspergillus sp. MEXU 27854
Source: Molecules. 2021 Sep 3;26(17):5362. doi: 10.3390/molecules26175362 (PMC8433890; doi:10.3390/molecules26175362)
Supplement: Supplementary file 1 [file molecules-26-05362-s001.zip]

Archive with 4 entries (4 files):
- SI Figures_Aspergillus sp MEXU 27854_Revised.pdf
- SI Tables_Aspergillus sp MEXU 27854_Final.pdf
- Table S2_Total predicted genes in the Aspergillus sp. MEXU 27854 genome and GO terms_draft02.xlsx
- Table S3_KEGG pathway classification in the Aspergillus sp. MEXU 27854 genome_draft02.xlsx
