# Supplementary material for: Genome Mining and Molecular Networking-Based Metabolomics of the Marine Facultative Aspergillus sp. MEXU 27854
Source: Molecules. 2021 Sep 3;26(17):5362. doi: 10.3390/molecules26175362 (PMC8433890; doi:10.3390/molecules26175362)
Supplement: Supplementary file 1 [file molecules-26-05362-s001.zip › SI Tables_Aspergillus sp MEXU 27854_Final.pdf]

# SUPPORTING INFORMATION TABLES

**Table S1.** Data of *Aspergillus* spp. genomes in the NCBI.

| Organism                                  | Genomes | Assembly Level <sup>a</sup> | GenBank Accession No.*                            | Size (Mbp) <sup>a</sup> |
|-------------------------------------------|---------|-----------------------------|---------------------------------------------------|-------------------------|
| <i>A. aculeatinus</i>                     | 2       | Scaffold                    | GCF_003184765.1, GCA_003184765.1                  | 36.47                   |
| <i>A. aculeatus</i>                       | 1       | Scaffold                    | GCF_001890905.1, GCA_001890905.1                  | 35.42                   |
| <i>A. aff. floccosus</i>                  | 1       | Scaffold                    | GCA_001931935.1                                   | 31.59                   |
| <i>A. alliaceus</i>                       | 2       | Scaffold                    | GCF_009176365.1, GCA_009176365.1                  | 40.17                   |
| <i>A. amoenus</i>                         | 1       | Scaffold                    | GCA_009812435.1                                   | 35.48                   |
| <i>A. arachidicola</i>                    | 2       | Scaffold                    | GCA_009193545.1                                   | 39.76                   |
| <i>A. avenaceus</i>                       | 1       | Scaffold                    | GCA_009193465.1                                   | 33.77                   |
| <i>A. awamori</i>                         | 1       | Contig                      | GCA_003850985.1                                   | 38.60                   |
| <i>A. awamori</i> var. <i>piceus</i>      | 1       | Scaffold                    | GCA_001599415.1                                   | 36.06                   |
| <i>A. bertholletiae</i>                   | 1       | Scaffold                    | GCA_009193595.1                                   | 37.47                   |
| <i>A. bombycis</i>                        | 1       | Contig                      | GCF_001792695.1, GCA_001792695.1                  | 37.47                   |
| <i>A. brasiliensis</i>                    | 1       | Scaffold                    | GCA_001889945.1                                   | 35.80                   |
| <i>A. brunneoviolaceus</i>                | 1       | Scaffold                    | GCF_003184695.1, GCA_003184695.1                  | 37.48                   |
| <i>A. burnettii</i>                       | 1       | Scaffold                    | GCA_013421405.2                                   | 41.00                   |
| <i>A. caelatus</i>                        | 1       | Scaffold                    | GCF_009193585.1, GCA_009193585.1                  | 40.02                   |
| <i>A. calidoustus</i>                     | 1       | Scaffold                    | GCA_001511075.1                                   | 41.10                   |
| <i>A. campestris</i>                      | 1       | Contig                      | GCF_002847485.1, GCA_002847485.1                  | 28.26                   |
| <i>A. candidus</i>                        | 1       | Scaffold                    | GCF_002847045.1, GCA_002847045.1                  | 27.32                   |
| <i>A. carbonarius</i>                     | 1       | Scaffold                    | GCA_001990825.1                                   | 36.15                   |
| <i>A. cejpai</i>                          | 1       | Contig                      | GCA_004769165.1                                   | 23.89                   |
| <i>A. chevalieri</i>                      | 2       | Complete genome             | GCA_016861735.1                                   | 29.70                   |
| <i>A. clavatus</i>                        | 1       | Scaffold                    | GCF_000002715.2                                   | 27.86                   |
| <i>A. coremiiformis</i>                   | 1       | Scaffold                    | GCA_009193565.1                                   | 30.13                   |
| <i>A. costaricensis</i>                   | 1       | Scaffold                    | GCF_003184835.1, GCA_003184835.1                  | 36.95                   |
| <i>A. cristatus</i>                       | 2       | Contig                      | GCA_001693355.1                                   | 27.70                   |
| <i>A. elegans</i>                         | 1       | Contig                      | GCA_016097275.1                                   | 36.78                   |
| <i>A. ellipticus</i>                      | 1       | Scaffold                    | GCA_003184645.1                                   | 42.87                   |
| <i>A. eucalypticola</i>                   | 1       | Contig                      | GCF_003184535.1, GCA_003184535.1                  | 34.79                   |
| <i>A. felis</i>                           | 3       | Complete genome             | GCA_016413765.1                                   | 33.03                   |
| <i>A. fijiensis</i>                       | 1       | Scaffold                    | GCF_003184825.1, GCA_003184825.1                  | 36.51                   |
| <i>A. fischeri</i>                        | 5       | Scaffold                    | GCF_000149645.2                                   | 31.67                   |
| <i>A. flavus</i>                          | 108     | Complete genome             | GCA_014784225.1, GCA_009856665.1, GCA_009017415.1 | 37.81, 37.53, 37.75     |
| <i>A. floridensis</i>                     | 1       | Scaffold                    | GCA_012184565.1                                   | 35.39                   |
| <i>A. fumigatiaffinis</i>                 | 4       | Scaffold                    | GCA_012656285.1                                   | 33.47                   |
| <i>A. fumigatus</i>                       | 23      | Chromosome                  | GCF_000002655.1                                   | 29.38                   |
| <i>A. fumigatus</i> var. <i>RP-2014</i>   | 1       | Scaffold                    | GCA_000731615.1                                   | 27.36                   |
| <i>A. fumigatus</i> var. <i>fumigatus</i> | 1       | Scaffold                    | GCA_001599455.1                                   | 28.39                   |
| <i>A. glaucus</i>                         | 1       | Scaffold                    | GCF_001890805.1, GCA_001890805.1                  | 27.99                   |
| <i>A. hancockii</i>                       | 1       | Scaffold                    | GCA_001696595.2                                   | 36.99                   |
| <i>A. heteromorphus</i>                   | 1       | Contig                      | GCF_003184545.1, GCA_003184545.1                  | 35.61                   |
| <i>A. hiratsukae</i>                      | 2       | Scaffold                    | GCA_014281905.1                                   | 30.07                   |
| <i>A. homomorphus</i>                     | 1       | Scaffold                    | GCF_003184865.1, GCA_003184865.1                  | 34.05                   |
| <i>A. ibericus</i>                        | 1       | Scaffold                    | GCF_003184845.1, GCA_003184845.1                  | 33.44                   |
| <i>A. incahuasiensis</i>                  | 1       | Scaffold                    | GCA_003719405.1                                   | 31.01                   |
| <i>A. indologenus</i>                     | 1       | Scaffold                    | GCA_003184685.1                                   | 38.59                   |
| <i>A. japonicus</i>                       | 2       | Scaffold                    | GCF_003184785.1, GCA_003184785.1                  | 36.10                   |
| <i>A. latus</i>                           | 7       | Scaffold                    | GCA_013306195.1                                   | 63.57                   |
| <i>A. lentulus</i>                        | 13      | Scaffold                    | GCF_010724455.1, GCA_010724455.1                  | 30.23                   |
| <i>A. leporis</i>                         | 1       | Scaffold                    | GCA_009176345.1                                   | 39.43                   |
| <i>A. luchuensis</i>                      | 13      | Complete genome             | GCF_016861625.1, GCA_016861625.1                  | 37.26                   |
| <i>A. melleus</i>                         | 1       | Contig                      | GCA_016097325.1                                   | 38.85                   |
| <i>A. minisclerotigenes</i>               | 1       | Scaffold                    | GCA_009176455.1                                   | 37.06                   |

|                              |            |            |                                                                    |                            |
|------------------------------|------------|------------|--------------------------------------------------------------------|----------------------------|
| <i>A. mulundensis</i>        | 1          | Scaffold   | GCF_003369625.1, GCA_003369625.1                                   | 45.34                      |
| <i>A. nanangensis</i>        | 1          | Scaffold   | GCA_015844325.1                                                    | 36.25                      |
| <i>A. neoellipticus</i>      | 1          | Scaffold   | GCA_003116565.1                                                    | 27.52                      |
| <i>A. neoniger</i>           | 1          | Scaffold   | GCF_003184625.1, GCA_003184625.1                                   | 35.42                      |
| <i>A. nidulans</i>           | 4          | Chromosome | GCA_000011425.1                                                    | 29.83                      |
| <i>A. niger</i>              | 22         | Scaffold   | GCF_000002855.3                                                    | 33.98                      |
| <i>A. nomiae</i>             | 2          | Contig     | GCF_001204775.2, GCA_001204775.2                                   | 36.14                      |
| <i>A. novofumigatus</i>      | 1          | Contig     | GCF_002847465.1, GCA_002847465.1                                   | 32.44                      |
| <i>A. novoparasiticus</i>    | 1          | Scaffold   | GCA_009176405.1                                                    | 40.86                      |
| <i>A. ochraceoroseus</i>     | 2          | Scaffold   | GCA_004849945.1                                                    | 37.02                      |
| <i>A. oerlinghausenensis</i> | 1          | Scaffold   | GCA_014250555.1                                                    | 32.32                      |
| <i>A. olivimuriae</i>        | 1          | Scaffold   | GCA_003719415.1                                                    | 30.09                      |
| <i>A. oryzae</i>             | 99         | Chromosome | GCA_018140735.1, GCA_018140755.1, GCA_018140865.1, GCF_000184455.2 | 38.12, 38.65, 37.79, 37.88 |
| <i>A. parasiticus</i>        | 10         | Chromosome | GCA_012897115.1                                                    | 37.05                      |
| <b>Total</b>                 | <b>374</b> |            |                                                                    |                            |

<sup>a</sup> Data from mayor assembly level.

**Table S2.** Total predicted genes in the *Aspergillus* sp. MEXU 27854 genome and GO terms (attached in separate file).

**Table S3.** KEGG pathway classification in the *Aspergillus* sp. MEXU 27854 genome (attached in separate file).

**Table S4.** Deduced functions of open reading frames (ORFs) in the *adox* BGC.

| Name  | GB accession No. | Amino Acids | Closest GenBank Homolog                                                                                    | Identity (%) | Similarity (%) |
|-------|------------------|-------------|------------------------------------------------------------------------------------------------------------|--------------|----------------|
| g2501 | MZ503791         | 537         | Transferase family protein ( <i>A. steynii</i> IBT 23096) XP_024708387.1                                   | 300/543 (55) | 378/543 (69)   |
|       |                  |             | Spermidine hydroxycinnamoyl transferase ( <i>A. awamori</i> ) GCB25197.1                                   | 282/549 (51) | 357/549 (65)   |
|       |                  |             | Hydroxycinnamoyl-CoA shikimate quinate Hydroxycinnamoyltransferase ( <i>F. heterosporum</i> ) KAF5675842.1 | 242/531 (46) | 347/531 (65)   |
|       |                  |             |                                                                                                            |              |                |
| g7012 | MZ503792         | 426         | MAK1-like monooxygenase ( <i>A. flavus</i> ) RAQ69429.1                                                    | 339/420 (81) | 377/420 (89)   |
|       |                  |             | Notoamide E oxidase notB ( <i>Aspergillus</i> sp. MF297-2) E1ACP7.2                                        | 124/408 (30) | 192/408 (47)   |
| g7440 |                  | 490         | Cytochrome P450 ( <i>A. leporis</i> ) KAB8067274                                                           | 378/490 (77) | 427/490 (87)   |
|       |                  |             | Isotrichodermin C-15 hydroxylase ( <i>A. awamori</i> ) GCB25848.1                                          | 361/490 (74) | 414/490 (84)   |
|       |                  |             | Cytochrome P450 monooxygenase notG ( <i>A. versicolor</i> ) L7WME9                                         | 129/453 (28) | 205/453 (45)   |
| g7441 | MZ503793         | 155         | Sterol glucosyltransferase ( <i>F. mundagurra</i> ) KAF5708001                                             | 59/138 (43)  | 84/138 (60)    |
|       |                  |             | Sterol glucosyltransferase ( <i>F. mexicanum</i> ) KAF5548227.1                                            | 55/138 (40)  | 83/138 (60)    |
| 7742  |                  | 261         | Cytochrome P450 ( <i>A. brunneoviolaceus</i> ) CBS 621.78                                                  | 131/299 (44) | 180/299 (60)   |
|       |                  |             | Cytochrome P450 ( <i>P. italicum</i> ) KGO77172.1                                                          | 132/298 (44) | 179/298 (60)   |
| g7443 |                  | 385         | Aromatic prenyltransferase, DMATS type ( <i>P. expansum</i> ) XP_016600812                                 | 115/371 (31) | 187/371 (50)   |

|       |          |                                                                                            |                    |                   |
|-------|----------|--------------------------------------------------------------------------------------------|--------------------|-------------------|
|       |          | <i>adxC</i> ( <i>A. aculeatus</i> ATCC 16872) XP_020052775                                 | 118/365<br>(32)    | 168/365<br>(46)   |
|       |          | Deoxybrevianamide E synthase notF ( <i>Aspergillus</i> sp. MF297-2) E0Y3X1.1               | 169/391<br>(43)    | 237/391<br>(60)   |
| g7444 | 248      | Cytochrome P450 ( <i>A. tubingensis</i> ) XP_035358893                                     | 98/255<br>(38)     | 134/255<br>(52)   |
|       |          | <i>adxA</i> ( <i>A. aculeatus</i> ATCC 16872) XP_020052773                                 | 1042/207<br>0 (50) | 1370/2070<br>(66) |
| g7445 | 2008     | Non-ribosomal Peptide Synthetase 10 ( <i>P. subrubescens</i> ) OKP06700                    | 810/2079<br>(39)   | 1177/2079<br>(56) |
|       |          | Non-ribosomal peptide synthase note ( <i>A. versicolor</i> L7WU80)                         | 469/1975<br>(24)   | 739/1975<br>(37)  |
| g7446 | 455      | Conserved hypothetical protein ( <i>A. terreus</i> NIH2624) XP_001213737                   | 374/455<br>(82)    | 394/455<br>(86)   |
| g7447 | 252      | DASH complex subunit Duo1-domain-containing protein ( <i>A. coremiiformis</i> ) KAE8353308 | 192/244<br>(79)    | 212/244<br>(86)   |
| g7448 | 191      | UPF0132 membrane protein AF_0105 ( <i>A. awamori</i> ) GCB25128                            | 157/194<br>(81)    | 172/194<br>(88)   |
| g7449 | 915      | Cell division control protein (Cdc15) ( <i>A. flavus</i> ) RAQ53306                        | 772/923<br>(84)    | 824/923<br>(89)   |
| g7450 | 2343     | Ccr4-Not transcription complex subunit ( <i>A. sclerotioniger</i> CBS 115572) XP_025467619 | 2114/234<br>4 (90) | 2230/2344<br>(95) |
| g7531 | MZ503794 | 295 methylglyoxal reductase (NADPH-dependent) gre2 ( <i>A. burnettii</i> ) KAF5862445.1    | 282/333<br>(85)    | 314/333<br>(94)   |
|       |          | <i>adxB</i> ( <i>A. aculeatus</i> ATCC 16872) XP_020052774                                 | 76/339<br>(22)     | 135/339<br>(39)   |

**Table S5.** <sup>1</sup>H NMR data of 3-O-methylbutyrolactone II (**9**).

| Position | 3-O-methylbutyrolactone II ( <b>9</b> )   |                                             |
|----------|-------------------------------------------|---------------------------------------------|
|          | $\delta_H$ , mult. (J in Hz) <sup>a</sup> | $\delta_H$ , mult. (J in Hz) <sup>b,c</sup> |
| 6a       | 3.55 (d, J=14.7)                          | 3.49 (d, J=14.4),                           |
| 6b       | 3.42 (d, J=14.7)                          | 3.43 (d, J=14.4)                            |
| 3-MeO    | 3.80 (s)                                  | 3.73 (s)                                    |
| 7-MeO    | 3.81 (s)                                  | 3.80 (s)                                    |
| 2'/6'    | 6.72 (d, J=8.4)                           | 6.68 (d, J=8.4)                             |
| 3'/5'    | 6.60 (d, J=8.4)                           | 6.61 (d, J=8.4)                             |
| 2''/6''  | 7.55 (d, J=8.8)                           | 7.54 (d, J=8.4)                             |
| 3''/6''  | 6.90 (d, J=8.8)                           | 6.97 (d, J=8.4)                             |

<sup>a</sup> 400 MHz, in CDCl<sub>3</sub>.

<sup>b</sup> 600 MHz in acetone-*d*<sub>6</sub>.

<sup>c</sup> Chen, M. et al. (2015) *Chem. Biodiversity*, 12, 1398-1406.
