# Supplementary material for: Genome Mining and Molecular Networking-Based Metabolomics of the Marine Facultative Aspergillus sp. MEXU 27854
Source: Molecules. 2021 Sep 3;26(17):5362. doi: 10.3390/molecules26175362 (PMC8433890; doi:10.3390/molecules26175362)
Supplement: Supplementary file 1 [file molecules-26-05362-s001.zip › Table S2_Total predicted genes in the Aspergillus sp. MEXU 27854 genome and GO terms_draft02.xlsx]

## Sheet: omicsbox_table
Table S2. Total predicted genes in the Aspergillus sp. MEXU 27854 genome and GO terms.
SeqName	Description	Length	e-Value	sim mean	GO IDs	GO Names	Enzyme Codes	Enzyme Names	InterPro GO IDs	InterPro GO Names
000001F|arrow.g1.t1	hypothetical protein ALT_0743	224	3.17931e-101	72.21	F:GO:0008233	F:peptidase activity	EC:3.4.21.73; EC:3.4.24.7; EC:3.4.21.71; EC:3.4.24.3; EC:3.4.21.34; EC:3.4.21.78; EC:3.4.21.75; EC:3.4.21.26; EC:3.4.21.27; EC:3.4.21.68; EC:3.4.21.69; EC:3.4.24.34; EC:3.4.21.41; EC:3.4.21.83; EC:3.4.21.88; EC:3.4.21.45; EC:3.4.21.89; EC:3.4.21.42; EC:3.4.19.1; EC:3.4.21.43; EC:3.4.21.87; EC:3.4.21.38; EC:3.4.21.35; EC:3.4.21.79; EC:3.4.21.36; EC:3.4.21.102; EC:3.4.21.39; EC:3.4.21; EC:3.4.21.4;…	U-plasminogen activator; Interstitial collagenase; Pancreatic elastase II; Microbial collagenase; Plasma kallikrein; Granzyme A; Furin; Prolyl oligopeptidase; Coagulation factor XIa; T-plasminogen activator; Protein C (activated); Neutrophil collagenase; Complement subcomponent C1r; Oligopeptidase B; Repressor LexA; Complement factor I; Signal peptidase I; Complement subcomponent C1s; Acylaminoac…	no IPS match	no IPS match
000001F|arrow.g2.t1	predicted protein	360	1.89178e-152	71.07					no GO terms	no GO terms
000001F|arrow.g3.t1	predicted protein	139	3.62363e-84	85.11					no IPS match	no IPS match
000001F|arrow.g4.t1	HAT dimerization	199	2.5787e-84	73.32	F:GO:0003674	F:molecular_function			F:GO:0046983	F:protein dimerization activity
000001F|arrow.g5.t1	Beta-lactamase domain-containing protein	659	0	88.3	P:GO:0006790; P:GO:0044281; F:GO:0003674	P:sulfur compound metabolic process; P:small molecule metabolic process; F:molecular_function	EC:3.1.6; EC:3.1; EC:3	Acting on ester bonds; Acting on ester bonds; Hydrolases	P:GO:0018909; F:GO:0018741; F:GO:0046983	P:dodecyl sulfate metabolic process; F:alkyl sulfatase activity; F:protein dimerization activity
000001F|arrow.g6.t1	Acetamidase regulatory protein	374	0	71.18	P:GO:0009058; P:GO:0034641; F:GO:0003677; F:GO:0003700; F:GO:0043167	P:biosynthetic process; P:cellular nitrogen compound metabolic process; F:DNA binding; F:DNA-binding transcription factor activity; F:ion binding			P:GO:0006351; F:GO:0003677; F:GO:0008270	P:transcription, DNA-templated; F:DNA binding; F:zinc ion binding
000001F|arrow.g7.t1	Phenylacetyl-CoA ligase, putative (JCVI)	117	5.70379e-34	66.34	F:GO:0016874; C:GO:0016020; C:GO:0016021	F:ligase activity; C:membrane; C:integral component of membrane			no GO terms	no GO terms
000001F|arrow.g8.t1	common central of tyrosinase domain-containing protein	350	0	83.23	F:GO:0016491; C:GO:0005694	F:oxidoreductase activity; C:chromosome	EC:1	Oxidoreductases	F:GO:0016491	F:oxidoreductase activity
000001F|arrow.g9.t1	Tetrapeptide transporter, OPT1/isp4	740	0	81.81	P:GO:0015031; P:GO:0055085; C:GO:0005575	P:protein transport; P:transmembrane transport; C:cellular_component			P:GO:0055085	P:transmembrane transport
000001F|arrow.g10.t1	hypothetical protein HAV15_011549	576	0	81.01					no GO terms	no GO terms
000001F|arrow.g11.t1	putative cutinase	220	2.78043e-123	77.78	P:GO:0005975; P:GO:0009056; F:GO:0003674; C:GO:0005576	P:carbohydrate metabolic process; P:catabolic process; F:molecular_function; C:extracellular region	EC:3.1; EC:3; EC:3.1.1.74; EC:3.1.1; EC:3.1.1.1	Acting on ester bonds; Hydrolases; Cutinase; Acting on ester bonds; Carboxylesterase	F:GO:0016787; F:GO:0050525; C:GO:0005576	F:hydrolase activity; F:cutinase activity; C:extracellular region
000001F|arrow.g12.t1	glycosyl hydrolase family 43 protein	514	0	81.56	P:GO:0005975; F:GO:0016798	P:carbohydrate metabolic process; F:hydrolase activity, acting on glycosyl bonds	EC:3.2; EC:3; EC:3.2.1	Glycosylases; Hydrolases; Glycosylases	P:GO:0005975; F:GO:0004553	P:carbohydrate metabolic process; F:hydrolase activity, hydrolyzing O-glycosyl compounds
000001F|arrow.g13.t1	conserved hypothetical protein	976	0	82.88	C:GO:0005575	C:cellular_component			no GO terms	no GO terms
000001F|arrow.g14.t1	Cellulase/esterase CelE	420	0	81.41	P:GO:0005975; P:GO:0009056; F:GO:0016798; C:GO:0005576	P:carbohydrate metabolic process; P:catabolic process; F:hydrolase activity, acting on glycosyl bonds; C:extracellular region	EC:3.2; EC:3.1; EC:3; EC:3.1.1; EC:3.1.1.1	Glycosylases; Acting on ester bonds; Hydrolases; Acting on ester bonds; Carboxylesterase	P:GO:0005975; F:GO:0030248; F:GO:0052689; C:GO:0005576	P:carbohydrate metabolic process; F:cellulose binding; F:carboxylic ester hydrolase activity; C:extracellular region
000001F|arrow.g15.t1	hypothetical protein NEOLEDRAFT_1177441	371	1.31711e-28	43.36	P:GO:0006355; P:GO:0006357; F:GO:0000981; F:GO:0003677; F:GO:0008270; C:GO:0005634; C:GO:0016020; C:GO:0016021	P:regulation of transcription, DNA-templated; P:regulation of transcription by RNA polymerase II; F:DNA-binding transcription factor activity, RNA polymerase II-specific; F:DNA binding; F:zinc ion binding; C:nucleus; C:membrane; C:integral component of membrane			no GO terms	no GO terms
000001F|arrow.g16.t1	FAD/NAD(P)-binding domain-containing protein	511	0	66.49					no GO terms	no GO terms
000001F|arrow.g17.t1	major facilitator superfamily domain-containing protein	501	0	92.45	F:GO:0022857; C:GO:0005575	F:transmembrane transporter activity; C:cellular_component	EC:7	Translocases	P:GO:0055085; F:GO:0022857	P:transmembrane transport; F:transmembrane transporter activity
000001F|arrow.g18.t1	NAD(P)-binding protein	289	0	85.89	F:GO:0016491	F:oxidoreductase activity	EC:1	Oxidoreductases	F:GO:0016491	F:oxidoreductase activity
000001F|arrow.g19.t1	amino acid transporter, putative	443	0	89.64	C:GO:0005575	C:cellular_component			no GO terms	no GO terms
000001F|arrow.g20.t1	predicted protein	669	0	78.25					no GO terms	no GO terms
000001F|arrow.g21.t1	acetamidase regulatory protein	577	0	68.67	P:GO:0009058; P:GO:0034641; F:GO:0003677; F:GO:0003700; F:GO:0043167; C:GO:0005575	P:biosynthetic process; P:cellular nitrogen compound metabolic process; F:DNA binding; F:DNA-binding transcription factor activity; F:ion binding; C:cellular_component			P:GO:0006351; P:GO:0006355; F:GO:0000981; F:GO:0003677; F:GO:0008270	P:transcription, DNA-templated; P:regulation of transcription, DNA-templated; F:DNA-binding transcription factor activity, RNA polymerase II-specific; F:DNA binding; F:zinc ion binding
000001F|arrow.g22.t1	putative acetoacetyl-CoA synthase	669	0	83.79	P:GO:0006629; F:GO:0016874	P:lipid metabolic process; F:ligase activity	EC:6.2; EC:6; EC:6.2.1; EC:6.2.1.16	Forming carbon-sulfur bonds; Ligases; Forming carbon-sulfur bonds; Acetoacetate--CoA ligase	P:GO:0006629; F:GO:0030729	P:lipid metabolic process; F:acetoacetate-CoA ligase activity
000001F|arrow.g23.t1	predicted protein	621	0	83.75	F:GO:0016491; F:GO:0043167	F:oxidoreductase activity; F:ion binding	EC:1.3; EC:1	Acting on the CH-CH group of donors; Oxidoreductases	F:GO:0016627	F:oxidoreductase activity, acting on the CH-CH group of donors
000001F|arrow.g24.t1	MIP transporter	325	0	89.73	F:GO:0022857; C:GO:0005575	F:transmembrane transporter activity; C:cellular_component	EC:3; EC:7	Hydrolases; Translocases	P:GO:0055085; F:GO:0015267; C:GO:0016020	P:transmembrane transport; F:channel activity; C:membrane
000001F|arrow.g25.t1	integral membrane protein	366	0	85.36	C:GO:0005575	C:cellular_component			no GO terms	no GO terms
000001F|arrow.g26.t1	o-methyltransferase	450	0	86.57	P:GO:0008150; F:GO:0008168	P:biological_process; F:methyltransferase activity	EC:2.1; EC:2; EC:2.1.1	Transferring one-carbon groups; Transferases; Transferring one-carbon groups	F:GO:0008168; F:GO:0008171	F:methyltransferase activity; F:O-methyltransferase activity
000001F|arrow.g27.t1	P-loop containing nucleoside triphosphate hydrolase protein	1548	0	85.17	F:GO:0016887; F:GO:0022857; F:GO:0043167; C:GO:0005575	F:ATPase activity; F:transmembrane transporter activity; F:ion binding; C:cellular_component	EC:3.6.1; EC:3.6; EC:3; EC:7; EC:7.2.2; EC:3.6.1.15	Acting on acid anhydrides; Acting on acid anhydrides; Hydrolases; Translocases; Catalysing the translocation of inorganic cations; Nucleoside-triphosphate phosphatase	P:GO:0055085; F:GO:0005524; F:GO:0042626; C:GO:0016021	P:transmembrane transport; F:ATP binding; F:ATPase-coupled transmembrane transporter activity; C:integral component of membrane
000001F|arrow.g28.t1	phosphonoacetate hydrolase	411	0	85.62	F:GO:0003674	F:molecular_function	EC:3.11.1.2; EC:3; EC:3.11	Phosphonoacetate hydrolase; Hydrolases; Acting on carbon-phosphorus bonds	F:GO:0003824; F:GO:0047400	F:catalytic activity; F:phosphonoacetate hydrolase activity
000001F|arrow.g29.t1	Transcription factor, fungi	307	2.61003e-96	66.56	F:GO:0003674	F:molecular_function			no GO terms	no GO terms
000001F|arrow.g30.t1	Rhodanese-like domain-containing protein	287	0	85.13					no GO terms	no GO terms
000001F|arrow.g31.t1	L-amino acid oxidase LaoA	572	0	90.09	F:GO:0016491	F:oxidoreductase activity	EC:1	Oxidoreductases	F:GO:0016491	F:oxidoreductase activity
000001F|arrow.g32.t1	phosphate transporter	567	0	90.31	F:GO:0022857; C:GO:0005575	F:transmembrane transporter activity; C:cellular_component	EC:7	Translocases	P:GO:0006817; F:GO:0005315; C:GO:0016020	P:phosphate ion transport; F:inorganic phosphate transmembrane transporter activity; C:membrane
000001F|arrow.g33.t1	uncharacterized protein BDV27DRAFT_401	187	1.38398e-41	74.79	C:GO:0005575	C:cellular_component			no GO terms	no GO terms
000001F|arrow.g34.t1	hypothetical protein ATETN484_0004003100	205	1.02756e-130	84.02	P:GO:0008150; F:GO:0003674; C:GO:0005575	P:biological_process; F:molecular_function; C:cellular_component			no GO terms	no GO terms
000001F|arrow.g35.t1	UPF0311-domain-containing protein	195	5.25897e-118	85.13					no GO terms	no GO terms
000001F|arrow.g36.t1	methyltransferase	325	0	82.19	P:GO:0008150; F:GO:0008168	P:biological_process; F:methyltransferase activity	EC:2.1; EC:2; EC:2.1.1	Transferring one-carbon groups; Transferases; Transferring one-carbon groups	no GO terms	no GO terms
000001F|arrow.g37.t1	WD40 repeat-like protein	1444	0	93.96	P:GO:0009058; P:GO:0034641; F:GO:0003677; F:GO:0003700; F:GO:0043167; C:GO:0005730	P:biosynthetic process; P:cellular nitrogen compound metabolic process; F:DNA binding; F:DNA-binding transcription factor activity; F:ion binding; C:nucleolus			P:GO:0006355; F:GO:0000981; F:GO:0005515; F:GO:0008270	P:regulation of transcription, DNA-templated; F:DNA-binding transcription factor activity, RNA polymerase II-specific; F:protein binding; F:zinc ion binding
000001F|arrow.g38.t1	WLM-domain-containing protein	414	0	91.99	F:GO:0008233; F:GO:0043167	F:peptidase activity; F:ion binding	EC:3.4; EC:3	Acting on peptide bonds (peptidases); Hydrolases	no GO terms	no GO terms
000001F|arrow.g39.t1	DUF1776-domain-containing protein	459	0	91.56	C:GO:0005575	C:cellular_component			no GO terms	no GO terms
000001F|arrow.g40.t1	predicted protein	269	1.21935e-168	86.33	C:GO:0005575	C:cellular_component			no GO terms	no GO terms
000001F|arrow.g41.t1	cell cycle inhibitor Nif1	745	0	81.47	F:GO:0003674	F:molecular_function			F:GO:0005515	F:protein binding
000001F|arrow.g42.t1	conserved hypothetical protein	332	0	81.44	C:GO:0005575	C:cellular_component			no GO terms	no GO terms
000001F|arrow.g43.t1	L-asparaginase precursor	376	0	87.91	P:GO:0006520; F:GO:0016810	P:cellular amino acid metabolic process; F:hydrolase activity, acting on carbon-nitrogen (but not peptide) bonds	EC:3.5.1; EC:3.5.1.1; EC:3.5; EC:3	Acting on carbon-nitrogen bonds, other than peptide bonds; Asparaginase; Acting on carbon-nitrogen bonds, other than peptide bonds; Hydrolases	P:GO:0006520; P:GO:0006528; F:GO:0004067	P:cellular amino acid metabolic process; P:asparagine metabolic process; F:asparaginase activity
000001F|arrow.g44.t1	glycoside hydrolase	369	0	93.14	P:GO:0005975; P:GO:0009056; F:GO:0016798	P:carbohydrate metabolic process; P:catabolic process; F:hydrolase activity, acting on glycosyl bonds	EC:3.2; EC:3; EC:3.2.1.14; EC:3.2.1	Glycosylases; Hydrolases; Chitinase; Glycosylases	P:GO:0005975; F:GO:0004553; F:GO:0008061	P:carbohydrate metabolic process; F:hydrolase activity, hydrolyzing O-glycosyl compounds; F:chitin binding
000001F|arrow.g45.t1	mRNA 3'-end-processing protein YTH1	254	0	95.63	F:GO:0043167	F:ion binding			F:GO:0046872	F:metal ion binding
000001F|arrow.g46.t1	minor allergen Alt a 7	203	2.04108e-136	95.52	F:GO:0016491; F:GO:0043167	F:oxidoreductase activity; F:ion binding	EC:1.6; EC:1; EC:1.6.5; EC:1.6.5.2	Acting on NADH or NADPH; Oxidoreductases; Acting on NADH or NADPH; NAD(P)H dehydrogenase (quinone)	F:GO:0003955; F:GO:0010181; F:GO:0016491	F:NAD(P)H dehydrogenase (quinone) activity; F:FMN binding; F:oxidoreductase activity
000001F|arrow.g47.t1	nuclear protein localization protein 4	652	0	94.31	P:GO:0009056; P:GO:0015031; C:GO:0005635; C:GO:0005783	P:catabolic process; P:protein transport; C:nuclear envelope; C:endoplasmic reticulum			P:GO:0006511	P:ubiquitin-dependent protein catabolic process
000001F|arrow.g48.t1	integral membrane protein	534	0	87.85	C:GO:0005575	C:cellular_component			no GO terms	no GO terms
000001F|arrow.g49.t1	Alpha/Beta hydrolase protein	401	0	90.64	P:GO:0006464; F:GO:0003674; C:GO:0005840	P:cellular protein modification process; F:molecular_function; C:ribosome	EC:3.1; EC:3; EC:3.1.1; EC:3.1.1.1	Acting on ester bonds; Hydrolases; Acting on ester bonds; Carboxylesterase	P:GO:0006482; F:GO:0051723	P:protein demethylation; F:protein methylesterase activity
000001F|arrow.g50.t1	WD40 repeat-like protein	736	0	95.65	P:GO:0006464; P:GO:0051276; F:GO:0008135; F:GO:0032182; C:GO:0005654; C:GO:0032991	P:cellular protein modification process; P:chromosome organization; F:translation factor activity, RNA binding; F:ubiquitin-like protein binding; C:nucleoplasm; C:protein-containing complex			F:GO:0005515	F:protein binding
000001F|arrow.g51.t1	mediator complex protein-domain-containing protein	175	2.49815e-102	86.04	P:GO:0009058; P:GO:0034641; F:GO:0003674; C:GO:0005634; C:GO:0032991	P:biosynthetic process; P:cellular nitrogen compound metabolic process; F:molecular_function; C:nucleus; C:protein-containing complex			P:GO:0006357; F:GO:0003712; C:GO:0016592	P:regulation of transcription by RNA polymerase II; F:transcription coregulator activity; C:mediator complex
000001F|arrow.g52.t1	F-actin capping protein beta subunit	266	0	98.16	P:GO:0007010; P:GO:0065003; F:GO:0008092; C:GO:0005737; C:GO:0005856; C:GO:0032991	P:cytoskeleton organization; P:protein-containing complex assembly; F:cytoskeletal protein binding; C:cytoplasm; C:cytoskeleton; C:protein-containing complex			P:GO:0030036; P:GO:0051016; F:GO:0003779; C:GO:0005737; C:GO:0008290	P:actin cytoskeleton organization; P:barbed-end actin filament capping; F:actin binding; C:cytoplasm; C:F-actin capping protein complex
000001F|arrow.g53.t1	ATP-dependent DNA helicase mph1	1101	0	85.23	P:GO:0006259; P:GO:0006950; P:GO:0051276; F:GO:0003677; F:GO:0004386; F:GO:0043167	P:DNA metabolic process; P:response to stress; P:chromosome organization; F:DNA binding; F:helicase activity; F:ion binding	EC:3.6.1; EC:3.6.4.12; EC:3.6; EC:3; EC:3.6.1.15	Acting on acid anhydrides; DNA helicase; Acting on acid anhydrides; Hydrolases; Nucleoside-triphosphate phosphatase	P:GO:0006281; F:GO:0003677; F:GO:0005524; F:GO:0016787; F:GO:0043138	P:DNA repair; F:DNA binding; F:ATP binding; F:hydrolase activity; F:3'-5' DNA helicase activity
000001F|arrow.g54.t1	predicted protein	183	6.91526e-64	74.99	F:GO:0003674; C:GO:0005575	F:molecular_function; C:cellular_component			no GO terms	no GO terms
000001F|arrow.g55.t1	HD superfamily hydrolase	238	4.6419e-136	74.88	F:GO:0016787	F:hydrolase activity			no GO terms	no GO terms
000001F|arrow.g56.t1	WD-40 repeat-containing protein	1093	0	83.47	F:GO:0003674	F:molecular_function			F:GO:0005515	F:protein binding
000001F|arrow.g57.t1	dolichol phosphate-mannose biosynthesis regulatory protein Dpm2	90	1.12237e-56	97.88	P:GO:0006464; P:GO:0006629; P:GO:0009058; P:GO:0044281; F:GO:0030234; C:GO:0005783	P:cellular protein modification process; P:lipid metabolic process; P:biosynthetic process; P:small molecule metabolic process; F:enzyme regulator activity; C:endoplasmic reticulum			P:GO:0019348; F:GO:0030234; C:GO:0030176	P:dolichol metabolic process; F:enzyme regulator activity; C:integral component of endoplasmic reticulum membrane
000001F|arrow.g58.t1	putative cell cycle control protein (Cwf22) [Aspergillus nomiae NRRL 13137]	809	0	95.61	F:GO:0003723	F:RNA binding			F:GO:0003723; F:GO:0005515	F:RNA binding; F:protein binding
000001F|arrow.g59.t1	MYND domain protein	563	0	85.77	P:GO:0030154; P:GO:0048646; F:GO:0003674	P:cell differentiation; P:anatomical structure formation involved in morphogenesis; F:molecular_function			F:GO:0005515	F:protein binding
000001F|arrow.g60.t1	wd and tetratricopeptide repeat protein	1079	0	80.58	F:GO:0003674	F:molecular_function			F:GO:0005515	F:protein binding
000001F|arrow.g61.t1	predicted protein	436	0	78.3	P:GO:0034641; P:GO:0044281; F:GO:0003674	P:cellular nitrogen compound metabolic process; P:small molecule metabolic process; F:molecular_function			no GO terms	no GO terms
000001F|arrow.g62.t1	purine and uridine phosphorylase	315	1.57783e-117	70.39	P:GO:0034641; P:GO:0044281; F:GO:0003674	P:cellular nitrogen compound metabolic process; P:small molecule metabolic process; F:molecular_function			P:GO:0009116; F:GO:0003824	P:nucleoside metabolic process; F:catalytic activity
000001F|arrow.g63.t1	hydrophobic surface binding protein A-domain-containing protein	177	5.20738e-99	73.22	C:GO:0005576	C:extracellular region			no GO terms	no GO terms
000001F|arrow.g64.t1	6-phosphogluconolactonase	266	1.51149e-180	93.87	P:GO:0005975; P:GO:0006091; F:GO:0003674	P:carbohydrate metabolic process; P:generation of precursor metabolites and energy; F:molecular_function	EC:3.1; EC:2; EC:3; EC:3.1.1.31; EC:3.1.1; EC:3.1.1.1	Acting on ester bonds; Transferases; Hydrolases; 6-phosphogluconolactonase; Acting on ester bonds; Carboxylesterase	P:GO:0005975; P:GO:0006098; F:GO:0017057	P:carbohydrate metabolic process; P:pentose-phosphate shunt; F:6-phosphogluconolactonase activity
000001F|arrow.g65.t1	hypothetical protein ATETN484_0004006400	77	3.09496e-46	88.44					no GO terms	no GO terms
000001F|arrow.g66.t1	vegetative cell wall protein gp1	378	0	89.15					no GO terms	no GO terms
000001F|arrow.g67.t1	x-pro dipeptidyl-peptidase c-terminal non-catalytic domain-containing protein	589	0	83.74	F:GO:0008233	F:peptidase activity	EC:3.4; EC:3.4.14.1; EC:3; EC:3.4.14.5; EC:3.4.14.4; EC:3.4.14.2; EC:3.4.14.11	Acting on peptide bonds (peptidases); Dipeptidyl-peptidase I; Hydrolases; Dipeptidyl-peptidase IV; Dipeptidyl-peptidase III; Dipeptidyl-peptidase II; Xaa-Pro dipeptidyl-peptidase	F:GO:0008239; F:GO:0016787	F:dipeptidyl-peptidase activity; F:hydrolase activity
000001F|arrow.g68.t1	predicted protein	703	0	59.99	P:GO:0009058; P:GO:0034641; F:GO:0003677; F:GO:0003700; F:GO:0043167	P:biosynthetic process; P:cellular nitrogen compound metabolic process; F:DNA binding; F:DNA-binding transcription factor activity; F:ion binding			P:GO:0006351; P:GO:0006355; F:GO:0000981; F:GO:0003677; F:GO:0008270	P:transcription, DNA-templated; P:regulation of transcription, DNA-templated; F:DNA-binding transcription factor activity, RNA polymerase II-specific; F:DNA binding; F:zinc ion binding
000001F|arrow.g69.t1	PhyH-domain-containing protein	324	0	87.64	F:GO:0016491	F:oxidoreductase activity	EC:1	Oxidoreductases	no GO terms	no GO terms
000001F|arrow.g70.t1	MFS general substrate transporter	548	0	71.43	F:GO:0022857; C:GO:0005575	F:transmembrane transporter activity; C:cellular_component	EC:7	Translocases	P:GO:0055085; F:GO:0022857; C:GO:0016021	P:transmembrane transport; F:transmembrane transporter activity; C:integral component of membrane
000001F|arrow.g71.t1	DUF1275 domain protein	272	0	89.22	C:GO:0005575	C:cellular_component			no GO terms	no GO terms
000001F|arrow.g72.t1	predicted protein	85	3.93512e-52	74.51					no GO terms	no GO terms
000001F|arrow.g73.t1	kinesin family protein	653	0	91.43	P:GO:0008150; F:GO:0008092; F:GO:0016887; F:GO:0043167; C:GO:0005856	P:biological_process; F:cytoskeletal protein binding; F:ATPase activity; F:ion binding; C:cytoskeleton	EC:3.6.1; EC:3.6; EC:3; EC:3.6.1.15	Acting on acid anhydrides; Acting on acid anhydrides; Hydrolases; Nucleoside-triphosphate phosphatase	P:GO:0007018; F:GO:0003777; F:GO:0005524; F:GO:0008017; F:GO:1990939	P:microtubule-based movement; F:microtubule motor activity; F:ATP binding; F:microtubule binding; F:ATP-dependent microtubule motor activity
000001F|arrow.g74.t1	kinesin-like protein KIF1C	559	0	85.88	F:GO:0008135	F:translation factor activity, RNA binding			P:GO:0044237	P:cellular metabolic process
000001F|arrow.g75.t1	Apc13p protein-domain-containing protein	164	1.24267e-98	89.04	P:GO:0007059; P:GO:0051276; P:GO:0140014; C:GO:0005634; C:GO:0032991	P:chromosome segregation; P:chromosome organization; P:mitotic nuclear division; C:nucleus; C:protein-containing complex			C:GO:0005680	C:anaphase-promoting complex
000001F|arrow.g76.t1	DNA polymerase	660	0	90.09	P:GO:0009058; F:GO:0003677	P:biosynthetic process; F:DNA binding			P:GO:0006260; F:GO:0003677	P:DNA replication; F:DNA binding
000001F|arrow.g77.t1	CRAL-TRIO domain-containing protein	385	0	91.51					no GO terms	no GO terms
000001F|arrow.g78.t1	nuclear protein SNF4	420	0	87.8	F:GO:0016301	F:kinase activity	EC:2.7; EC:2	Transferring phosphorus-containing groups; Transferases	no GO terms	no GO terms
000001F|arrow.g79.t1	predicted protein	692	0	64.79					no GO terms	no GO terms
000001F|arrow.g80.t1	bZIP transcription factor (Atf21), putative	361	4.38326e-73	55.06	P:GO:0006950; P:GO:0009058; P:GO:0034641; F:GO:0003677; F:GO:0003700	P:response to stress; P:biosynthetic process; P:cellular nitrogen compound metabolic process; F:DNA binding; F:DNA-binding transcription factor activity			P:GO:0006355; F:GO:0003677; F:GO:0003700	P:regulation of transcription, DNA-templated; F:DNA binding; F:DNA-binding transcription factor activity
000001F|arrow.g81.t1	general substrate transporter	553	0	83.5	F:GO:0022857; C:GO:0005886	F:transmembrane transporter activity; C:plasma membrane	EC:7	Translocases	P:GO:0055085; F:GO:0022857; C:GO:0016020; C:GO:0016021	P:transmembrane transport; F:transmembrane transporter activity; C:membrane; C:integral component of membrane
000001F|arrow.g82.t1	ATP-dependent bile acid permease	1285	0	64.52	F:GO:0016887; F:GO:0022857; F:GO:0043167; C:GO:0005575	F:ATPase activity; F:transmembrane transporter activity; F:ion binding; C:cellular_component	EC:3.6.1; EC:3.6; EC:3; EC:7; EC:7.2.2; EC:3.6.1.15	Acting on acid anhydrides; Acting on acid anhydrides; Hydrolases; Translocases; Catalysing the translocation of inorganic cations; Nucleoside-triphosphate phosphatase	P:GO:0055085; F:GO:0005524; F:GO:0042626; C:GO:0016021	P:transmembrane transport; F:ATP binding; F:ATPase-coupled transmembrane transporter activity; C:integral component of membrane
000001F|arrow.g83.t1	alkaline-phosphatase-like protein	609	0	96.26	F:GO:0003674	F:molecular_function	EC:3.1.6; EC:3.1; EC:3	Acting on ester bonds; Acting on ester bonds; Hydrolases	F:GO:0003824; F:GO:0008484	F:catalytic activity; F:sulfuric ester hydrolase activity
000001F|arrow.g84.t1	Zn(II)2Cys6 transcription factor	1156	0	70.99	P:GO:0009058; P:GO:0034641; F:GO:0003700; F:GO:0022857; F:GO:0043167; C:GO:0005575	P:biosynthetic process; P:cellular nitrogen compound metabolic process; F:DNA-binding transcription factor activity; F:transmembrane transporter activity; F:ion binding; C:cellular_component	EC:7	Translocases	P:GO:0006355; P:GO:0034755; F:GO:0000981; F:GO:0005381; F:GO:0008270; C:GO:0016021	P:regulation of transcription, DNA-templated; P:iron ion transmembrane transport; F:DNA-binding transcription factor activity, RNA polymerase II-specific; F:iron ion transmembrane transporter activity; F:zinc ion binding; C:integral component of membrane
000001F|arrow.g85.t1	nitrile-specifier protein 5	331	0	83.3	F:GO:0003674	F:molecular_function			F:GO:0005515	F:protein binding
000001F|arrow.g86.t1	mitochondrial 3-hydroxyisobutyryl-CoA hydrolase	472	0	95.17	P:GO:0006520; P:GO:0009056; F:GO:0016853	P:cellular amino acid metabolic process; P:catabolic process; F:isomerase activity	EC:3.1; EC:3; EC:5; EC:3.1.2.4; EC:3.1.2	Acting on ester bonds; Hydrolases; Isomerases; 3-hydroxyisobutyryl-CoA hydrolase; Acting on ester bonds	F:GO:0003824; F:GO:0003860	F:catalytic activity; F:3-hydroxyisobutyryl-CoA hydrolase activity
000001F|arrow.g87.t1	50S ribosomal protein L4	246	7.35576e-177	91.45	P:GO:0006412; F:GO:0003735; F:GO:0016491; C:GO:0005840	P:translation; F:structural constituent of ribosome; F:oxidoreductase activity; C:ribosome	EC:1	Oxidoreductases	P:GO:0006412; F:GO:0003735; C:GO:0005840	P:translation; F:structural constituent of ribosome; C:ribosome
000001F|arrow.g88.t1	phosphatidylethanolamine-binding protein	420	0	94.95	C:GO:0005840	C:ribosome			no GO terms	no GO terms
000001F|arrow.g89.t1	hydroxyacylglutathione hydrolase	673	0	82.15	P:GO:0009056; P:GO:0009058; P:GO:0042254; P:GO:0044281; F:GO:0003677; F:GO:0004518; F:GO:0008233; F:GO:0043167; C:GO:0005783; C:GO:0005829; C:GO:0032991	P:catabolic process; P:biosynthetic process; P:ribosome biogenesis; P:small molecule metabolic process; F:DNA binding; F:nuclease activity; F:peptidase activity; F:ion binding; C:endoplasmic reticulum; C:cytosol; C:protein-containing complex	EC:3.4.21.73; EC:3.4.24.7; EC:3.4.21.71; EC:3.4.24.3; EC:3.4.21.34; EC:3.4.21.78; EC:3.4.21.75; EC:3.4.21.26; EC:3.4.21.27; EC:3.4.21.68; EC:3.4.21.69; EC:3.4.24.34; EC:3.4.21.41; EC:3.4.21.83; EC:3.4.21.88; EC:3.4.21.45; EC:3.4.21.89; EC:3.4.21.42; EC:3.4.19.1; EC:3.4.21.43; EC:3.4.21.87; EC:3.4.21.38; EC:3.4.21.35; EC:3.4.21.79; EC:3.4.21.36; EC:3.4.21.102; EC:3.4.21.39; EC:3.1.2.6; EC:3.4.21; …	U-plasminogen activator; Interstitial collagenase; Pancreatic elastase II; Microbial collagenase; Plasma kallikrein; Granzyme A; Furin; Prolyl oligopeptidase; Coagulation factor XIa; T-plasminogen activator; Protein C (activated); Neutrophil collagenase; Complement subcomponent C1r; Oligopeptidase B; Repressor LexA; Complement factor I; Signal peptidase I; Complement subcomponent C1s; Acylaminoac…	P:GO:0006508; F:GO:0008236; C:GO:0016020	P:proteolysis; F:serine-type peptidase activity; C:membrane
000001F|arrow.g90.t1	Las1-like-domain-containing protein	407	0	77.4	P:GO:0042254; F:GO:0004518; F:GO:0043167; C:GO:0005829; C:GO:0032991	P:ribosome biogenesis; F:nuclease activity; F:ion binding; C:cytosol; C:protein-containing complex	EC:3.1; EC:3; EC:3.1.2.6; EC:3.1.2	Acting on ester bonds; Hydrolases; Hydroxyacylglutathione hydrolase; Acting on ester bonds	P:GO:0006364; F:GO:0004519; C:GO:0090730	P:rRNA processing; F:endonuclease activity; C:Las1 complex
000001F|arrow.g91.t1	predicted protein	384	0	72.41					no GO terms	no GO terms
000001F|arrow.g92.t1	NAD+ kinase	512	0	88.09	P:GO:0009058; P:GO:0034641; P:GO:0044281; F:GO:0016301	P:biosynthetic process; P:cellular nitrogen compound metabolic process; P:small molecule metabolic process; F:kinase activity	EC:2.7.1; EC:2.7; EC:2; EC:2.7.1.23	Transferring phosphorus-containing groups; Transferring phosphorus-containing groups; Transferases; NAD(+) kinase	P:GO:0006741; P:GO:0019674; F:GO:0003951	P:NADP biosynthetic process; P:NAD metabolic process; F:NAD+ kinase activity
000001F|arrow.g93.t1	BET3 family protein	256	0	94.25	P:GO:0016192; C:GO:0032991	P:vesicle-mediated transport; C:protein-containing complex			P:GO:0048193; C:GO:0030008	P:Golgi vesicle transport; C:TRAPP complex
000001F|arrow.g94.t1	splicing factor, Prp19-binding domain-containing protein	478	0	81.82					no GO terms	no GO terms
000001F|arrow.g95.t1	replication factor A protein 3	124	3.60162e-84	92.33	P:GO:0006259; P:GO:0006950; P:GO:0009058; F:GO:0003677; C:GO:0005634	P:DNA metabolic process; P:response to stress; P:biosynthetic process; F:DNA binding; C:nucleus			P:GO:0006260; P:GO:0006281; P:GO:0006310; F:GO:0003677; C:GO:0005634	P:DNA replication; P:DNA repair; P:DNA recombination; F:DNA binding; C:nucleus
000001F|arrow.g96.t1	GATA transcription factor (Ams2)	1187	0	85.19	P:GO:0009058; P:GO:0034641; F:GO:0003677; F:GO:0043167	P:biosynthetic process; P:cellular nitrogen compound metabolic process; F:DNA binding; F:ion binding			no GO terms	no GO terms
000001F|arrow.g97.t1	Sm-like ribonucleo protein	115	2.9241e-80	99.04	P:GO:0006397; P:GO:0006399; F:GO:0003723; C:GO:0005634; C:GO:0032991	P:mRNA processing; P:tRNA metabolic process; F:RNA binding; C:nucleus; C:protein-containing complex			P:GO:0008380; C:GO:0030532	P:RNA splicing; C:small nuclear ribonucleoprotein complex
000001F|arrow.g98.t1	Dak1 domain-containing protein	589	0	92.38	P:GO:0005975; P:GO:0006091; P:GO:0009056; P:GO:0044281; F:GO:0016301; F:GO:0043167	P:carbohydrate metabolic process; P:generation of precursor metabolites and energy; P:catabolic process; P:small molecule metabolic process; F:kinase activity; F:ion binding	EC:2.7.1; EC:2.7.1.29; EC:2.7.1.28; EC:2.7; EC:2	Transferring phosphorus-containing groups; Glycerone kinase; Triokinase; Transferring phosphorus-containing groups; Transferases	P:GO:0006071; F:GO:0004371; F:GO:0005524	P:glycerol metabolic process; F:glycerone kinase activity; F:ATP binding
000001F|arrow.g99.t1	hypothetical protein ATETN484_0004010200	2539	0	91.19	P:GO:0009056; F:GO:0019899; C:GO:0005635; C:GO:0032991	P:catabolic process; F:enzyme binding; C:nuclear envelope; C:protein-containing complex			P:GO:0006511; F:GO:0031625; C:GO:0005643; C:GO:0031461	P:ubiquitin-dependent protein catabolic process; F:ubiquitin protein ligase binding; C:nuclear pore; C:cullin-RING ubiquitin ligase complex
000001F|arrow.g100.t1	serine/threonine-protein kinase tel1	2856	0	82.59	P:GO:0006259; P:GO:0006464; P:GO:0006950; P:GO:0007049; P:GO:0042592; P:GO:0051276; F:GO:0016301; F:GO:0043167; C:GO:0005694	P:DNA metabolic process; P:cellular protein modification process; P:response to stress; P:cell cycle; P:homeostatic process; P:chromosome organization; F:kinase activity; F:ion binding; C:chromosome	EC:2.7.1; EC:2.7.11; EC:2.7.11.1; EC:2.7; EC:2	Transferring phosphorus-containing groups; Transferring phosphorus-containing groups; Non-specific serine/threonine protein kinase; Transferring phosphorus-containing groups; Transferases	P:GO:0000077; P:GO:0000723; P:GO:0006281; P:GO:0006974; P:GO:0016572; F:GO:0004674; F:GO:0005515; F:GO:0016301	P:DNA damage checkpoint; P:telomere maintenance; P:DNA repair; P:cellular response to DNA damage stimulus; P:histone phosphorylation; F:protein serine/threonine kinase activity; F:protein binding; F:kinase activity
000001F|arrow.g101.t1	UPF0052 domain protein	513	0	91.58	F:GO:0003674	F:molecular_function	EC:2.7.1; EC:2.7; EC:2; EC:2.7.8.28	Transferring phosphorus-containing groups; Transferring phosphorus-containing groups; Transferases; Phosphoenolpyruvate transferase	F:GO:0043743	F:LPPG:FO 2-phospho-L-lactate transferase activity
000001F|arrow.g102.t1	acetyl-CoA synthetase-like protein	925	0	82.93	P:GO:0009058; F:GO:0003674; C:GO:0005737	P:biosynthetic process; F:molecular_function; C:cytoplasm	EC:3.1; EC:2; EC:3	Acting on ester bonds; Transferases; Hydrolases	P:GO:0009058	P:biosynthetic process
000001F|arrow.g103.t1	DNA polymerase gamma	1099	0	94.1	P:GO:0006259; P:GO:0009058; F:GO:0003677; F:GO:0016779; C:GO:0005739; C:GO:0032991	P:DNA metabolic process; P:biosynthetic process; F:DNA binding; F:nucleotidyltransferase activity; C:mitochondrion; C:protein-containing complex	EC:2.7; EC:2; EC:2.7.7.7; EC:2.7.7	Transferring phosphorus-containing groups; Transferases; DNA-directed DNA polymerase; Transferring phosphorus-containing groups	P:GO:0006260; F:GO:0003677; F:GO:0003887; C:GO:0005760	P:DNA replication; F:DNA binding; F:DNA-directed DNA polymerase activity; C:gamma DNA polymerase complex
000001F|arrow.g104.t1	cora family metal ion transporter	639	0	86.36	F:GO:0022857; C:GO:0005575	F:transmembrane transporter activity; C:cellular_component	EC:7	Translocases	P:GO:0030001; P:GO:0055085; F:GO:0046873; C:GO:0016020	P:metal ion transport; P:transmembrane transport; F:metal ion transmembrane transporter activity; C:membrane
000001F|arrow.g105.t1	squalene/phytoene synthase	399	0	88.33					no GO terms	no GO terms
000001F|arrow.g106.t1	SNF2 family N-terminal domain-containing protein	1206	0	84.19	P:GO:0006259; P:GO:0006464; P:GO:0006950; F:GO:0003677; F:GO:0004386; F:GO:0043167; C:GO:0005694	P:DNA metabolic process; P:cellular protein modification process; P:response to stress; F:DNA binding; F:helicase activity; F:ion binding; C:chromosome	EC:3.6.1; EC:3.6; EC:2; EC:3; EC:3.6.1.15	Acting on acid anhydrides; Acting on acid anhydrides; Transferases; Hydrolases; Nucleoside-triphosphate phosphatase	F:GO:0003676; F:GO:0005524; F:GO:0008270; F:GO:0016818; F:GO:0070615	F:nucleic acid binding; F:ATP binding; F:zinc ion binding; F:hydrolase activity, acting on acid anhydrides, in phosphorus-containing anhydrides; F:nucleosome-dependent ATPase activity
000001F|arrow.g107.t1	predicted protein	1673	0	70.47					no GO terms	no GO terms
000001F|arrow.g108.t1	GTP-binding protein 1	618	0	95.34	F:GO:0003924; F:GO:0043167	F:GTPase activity; F:ion binding	EC:3.6.1; EC:3.6; EC:3; EC:3.6.1.15	Acting on acid anhydrides; Acting on acid anhydrides; Hydrolases; Nucleoside-triphosphate phosphatase	F:GO:0003924; F:GO:0005525	F:GTPase activity; F:GTP binding
000001F|arrow.g109.t1	U6 snRNA-associated Sm-like protein LSm3	97	5.39164e-64	98.45	P:GO:0006397; P:GO:0006399; P:GO:0022607; P:GO:0034655; F:GO:0003723; C:GO:0005634; C:GO:0005737; C:GO:0032991	P:mRNA processing; P:tRNA metabolic process; P:cellular component assembly; P:nucleobase-containing compound catabolic process; F:RNA binding; C:nucleus; C:cytoplasm; C:protein-containing complex			P:GO:0000398; P:GO:0000956; F:GO:0003723	P:mRNA splicing, via spliceosome; P:nuclear-transcribed mRNA catabolic process; F:RNA binding
000001F|arrow.g110.t1	mitochondrial ATPase expression-domain-containing protein	599	0	77.74					no GO terms	no GO terms
000001F|arrow.g111.t1	putative deacetylase LmbE-like domain-containing protein	313	0	84.87	P:GO:0006464; P:GO:0006629; P:GO:0009058; F:GO:0016810; C:GO:0005575	P:cellular protein modification process; P:lipid metabolic process; P:biosynthetic process; F:hydrolase activity, acting on carbon-nitrogen (but not peptide) bonds; C:cellular_component	EC:3.5.1; EC:3.5.1.89; EC:3.5; EC:3	Acting on carbon-nitrogen bonds, other than peptide bonds; N-acetylglucosaminylphosphatidylinositol deacetylase; Acting on carbon-nitrogen bonds, other than peptide bonds; Hydrolases	P:GO:0006506; F:GO:0000225	P:GPI anchor biosynthetic process; F:N-acetylglucosaminylphosphatidylinositol deacetylase activity
000001F|arrow.g112.t1	arrestin (or S-antigen), N-terminal domain protein	525	0	89.56					no GO terms	no GO terms
000001F|arrow.g113.t1	hypothetical protein ATETN484_0004011600	100	3.17116e-53	90					no GO terms	no GO terms
000001F|arrow.g114.t1	glutathione S-transferase	185	4.49401e-111	87.57	P:GO:0006790; P:GO:0034641; F:GO:0003674	P:sulfur compound metabolic process; P:cellular nitrogen compound metabolic process; F:molecular_function	EC:2	Transferases	P:GO:0006749; F:GO:0005515	P:glutathione metabolic process; F:protein binding
000001F|arrow.g115.t1	predicted protein	202	4.61749e-89	75.2					no GO terms	no GO terms
000001F|arrow.g116.t1	predicted protein	463	0	63.71					no GO terms	no GO terms
000001F|arrow.g117.t1	2-amino-3-carboxymuconate-6-semialdehyde decarboxylase [Aspergillus nomiae NRRL 13137]	383	0	94.64	F:GO:0016829	F:lyase activity	EC:4.1.1; EC:4.1; EC:3; EC:4	Carbon-carbon lyases; Carbon-carbon lyases; Hydrolases; Lyases	F:GO:0016787; F:GO:0016831	F:hydrolase activity; F:carboxy-lyase activity
000001F|arrow.g118.t1	Clavaminate synthase-like protein	352	0	92.41	F:GO:0016491; F:GO:0043167	F:oxidoreductase activity; F:ion binding	EC:1	Oxidoreductases	F:GO:0016491	F:oxidoreductase activity
000001F|arrow.g119.t1	short chain dehydrogenase/reductase family	299	0	86.04	F:GO:0016491; F:GO:0016746	F:oxidoreductase activity; F:transferase activity, transferring acyl groups	EC:2.3.1.85; EC:1.1; EC:2.3; EC:1; EC:2; EC:1.1.1; EC:1.1.1.100; EC:2.3.1	Fatty-acid synthase system; Acting on the CH-OH group of donors; Acyltransferases; Oxidoreductases; Transferases; Acting on the CH-OH group of donors; 3-oxoacyl-[acyl-carrier-protein] reductase; Acyltransferases	F:GO:0016491	F:oxidoreductase activity
000001F|arrow.g120.t1	protein rds1	462	0	87.01					no GO terms	no GO terms
000001F|arrow.g121.t1	Nitroreductase family protein	298	0	81.83	C:GO:0005575	C:cellular_component			no GO terms	no GO terms
000001F|arrow.g122.t1	adenylate-forming enzyme AfeA	605	0	90.8	F:GO:0016874; C:GO:0005575	F:ligase activity; C:cellular_component	EC:6	Ligases	no GO terms	no GO terms
000001F|arrow.g123.t1	integral membrane protein TmpA [Aspergillus nomiae NRRL 13137]	492	0	89.08	C:GO:0005575	C:cellular_component			no GO terms	no GO terms
000001F|arrow.g124.t1	Pantothenate transporter liz1	514	0	81.7	F:GO:0022857; C:GO:0005575	F:transmembrane transporter activity; C:cellular_component	EC:7	Translocases	P:GO:0055085; F:GO:0022857	P:transmembrane transport; F:transmembrane transporter activity
000001F|arrow.g125.t1	uncharacterized protein P170DRAFT_458846	691	0	73.72	P:GO:0008150; F:GO:0003674; C:GO:0005575	P:biological_process; F:molecular_function; C:cellular_component			no GO terms	no GO terms
000001F|arrow.g126.t1	Unsaturated chondroitin disaccharide hydrolase	509	0	77.57	P:GO:0005975; F:GO:0016798	P:carbohydrate metabolic process; F:hydrolase activity, acting on glycosyl bonds	EC:3.2; EC:3	Glycosylases; Hydrolases	P:GO:0005975	P:carbohydrate metabolic process
000001F|arrow.g127.t1	TPA: Putative Zn(II)2Cys6 transcription factor (Eurofung)	616	0	75.73	P:GO:0009058; P:GO:0034641; F:GO:0003677; F:GO:0003700; F:GO:0043167	P:biosynthetic process; P:cellular nitrogen compound metabolic process; F:DNA binding; F:DNA-binding transcription factor activity; F:ion binding			P:GO:0006351; F:GO:0003677; F:GO:0008270	P:transcription, DNA-templated; F:DNA binding; F:zinc ion binding
000001F|arrow.g128.t1	DnaJ-domain-containing protein	434	0	84.39	F:GO:0003723	F:RNA binding			no GO terms	no GO terms
000001F|arrow.g129.t1	putative transferase caf17, mitochondrial	436	0	86.1	F:GO:0003723; F:GO:0043167	F:RNA binding; F:ion binding	EC:2; EC:3	Transferases; Hydrolases	F:GO:0005515	F:protein binding
000001F|arrow.g130.t1	Dcp2, box A domain-containing protein	841	0	71.34	P:GO:0034655; F:GO:0003723; F:GO:0043167	P:nucleobase-containing compound catabolic process; F:RNA binding; F:ion binding	EC:3.6.1; EC:3.6.1.30; EC:3.6; EC:3	Acting on acid anhydrides; Acting on acid anhydrides; Acting on acid anhydrides; Hydrolases	P:GO:0000184; P:GO:0000290; F:GO:0003723; F:GO:0016787; F:GO:0030145; F:GO:0050072	P:nuclear-transcribed mRNA catabolic process, nonsense-mediated decay; P:deadenylation-dependent decapping of nuclear-transcribed mRNA; F:RNA binding; F:hydrolase activity; F:manganese ion binding; F:m7G(5')pppN diphosphatase activity
000001F|arrow.g131.t1	PH domain protein	253	1.45841e-166	83.89	C:GO:0005575	C:cellular_component			no GO terms	no GO terms
000001F|arrow.g132.t1	cytoplasmic tRNA 2-thiolation protein 2	331	0	82.03	P:GO:0006399; P:GO:0006464; F:GO:0003723; F:GO:0016779; C:GO:0005829	P:tRNA metabolic process; P:cellular protein modification process; F:RNA binding; F:nucleotidyltransferase activity; C:cytosol	EC:2.8.1.4; EC:2.7; EC:2; EC:2.7.7	tRNA uracil 4-sulfurtransferase; Transferring phosphorus-containing groups; Transferases; Transferring phosphorus-containing groups	P:GO:0002098; P:GO:0034227; F:GO:0000049	P:tRNA wobble uridine modification; P:tRNA thio-modification; F:tRNA binding
000001F|arrow.g133.t1	lung seven transmembrane receptor-domain-containing protein	536	0	94.33	C:GO:0005575	C:cellular_component			C:GO:0016021	C:integral component of membrane
000001F|arrow.g134.t1	acid phosphatase precursor	612	0	90.61	F:GO:0016791; F:GO:0043167	F:phosphatase activity; F:ion binding	EC:3.1; EC:3; EC:3.1.3.2; EC:3.1.3	Acting on ester bonds; Hydrolases; Acid phosphatase; Acting on ester bonds	F:GO:0003993; F:GO:0016787; F:GO:0046872	F:acid phosphatase activity; F:hydrolase activity; F:metal ion binding
000001F|arrow.g135.t1	glucan 1,3-beta-glucosidase	322	6.24784e-98	69.94	P:GO:0005975; P:GO:0009056; F:GO:0016798	P:carbohydrate metabolic process; P:catabolic process; F:hydrolase activity, acting on glycosyl bonds	EC:3.2; EC:3; EC:3.2.1.14; EC:3.2.1	Glycosylases; Hydrolases; Chitinase; Glycosylases	no GO terms	no GO terms
000001F|arrow.g136.t1	predicted protein	277	1.60425e-128	77.71	C:GO:0005575	C:cellular_component			no GO terms	no GO terms
000001F|arrow.g137.t1	sporulation associated protein	470	0	90.72	C:GO:0005575	C:cellular_component			no GO terms	no GO terms
000001F|arrow.g138.t1	heme peroxidase	1184	0	89	P:GO:0006950; F:GO:0016491; F:GO:0016853; F:GO:0043167	P:response to stress; F:oxidoreductase activity; F:isomerase activity; F:ion binding	EC:1.13.11; EC:1.13; EC:1.11; EC:1; EC:1.14; EC:5; EC:1.11.1; EC:1.13.11.60	Acting on single donors with incorporation of molecular oxygen (oxygenases). The oxygen incorporated need not be derived from O(2); Acting on single donors with incorporation of molecular oxygen (oxygenases). The oxygen incorporated need not be derived from O(2); Acting on a peroxide as acceptor; Oxidoreductases; Acting on paired donors, with incorporation or reduction of molecular oxygen. The ox…	P:GO:0006979; F:GO:0004601; F:GO:0005506; F:GO:0016491; F:GO:0016705; F:GO:0020037	P:response to oxidative stress; F:peroxidase activity; F:iron ion binding; F:oxidoreductase activity; F:oxidoreductase activity, acting on paired donors, with incorporation or reduction of molecular oxygen; F:heme binding
000001F|arrow.g139.t1	P-loop containing nucleoside triphosphate hydrolase protein	279	0	88.38	F:GO:0003674; C:GO:0005575	F:molecular_function; C:cellular_component	EC:3	Hydrolases	no GO terms	no GO terms
000001F|arrow.g140.t1	hypothetical protein ATETN484_0004013900	532	0	80.84					no GO terms	no GO terms
000001F|arrow.g141.t1	WD repeat protein	373	0	95.23	F:GO:0003674; C:GO:0005654; C:GO:0032991	F:molecular_function; C:nucleoplasm; C:protein-containing complex			F:GO:0005515; C:GO:0048188	F:protein binding; C:Set1C/COMPASS complex
000001F|arrow.g142.t1	mitochondrial carrier protein	310	0	94.67	C:GO:0005575	C:cellular_component			no GO terms	no GO terms
000001F|arrow.g143.t1	putative ribonucleotide reductase small subunit RnrA	401	0	95.85	P:GO:0009058; P:GO:0034641; P:GO:0044281; F:GO:0016491; F:GO:0043167; C:GO:0005829; C:GO:0032991	P:biosynthetic process; P:cellular nitrogen compound metabolic process; P:small molecule metabolic process; F:oxidoreductase activity; F:ion binding; C:cytosol; C:protein-containing complex	EC:1.17.4; EC:1.17; EC:1; EC:1.17.4.1	Acting on CH or CH(2) groups; Acting on CH or CH(2) groups; Oxidoreductases; Ribonucleoside-diphosphate reductase	P:GO:0009263; F:GO:0016491	P:deoxyribonucleotide biosynthetic process; F:oxidoreductase activity
000001F|arrow.g144.t1	WD40 repeat-like protein	1138	0	77.86	F:GO:0003674	F:molecular_function			F:GO:0005515	F:protein binding
000001F|arrow.g145.t1	Oxo-4-hydroxy-4-carboxy-5-ureidoimidazoline decarboxylase	188	5.47414e-115	93.2	P:GO:0034641; P:GO:0044281	P:cellular nitrogen compound metabolic process; P:small molecule metabolic process			no GO terms	no GO terms
000001F|arrow.g146.t1	GPI-anchored cell surface glycoprotein	1127	0	76.51	C:GO:0005737	C:cytoplasm			no GO terms	no GO terms
000001F|arrow.g147.t1	pseudouridine synthase	410	0	85.31	P:GO:0034641; F:GO:0003723; F:GO:0016853	P:cellular nitrogen compound metabolic process; F:RNA binding; F:isomerase activity	EC:5.4; EC:5	Intramolecular transferases; Isomerases	P:GO:0001522; P:GO:0006396; P:GO:0009451; F:GO:0003723; F:GO:0009982	P:pseudouridine synthesis; P:RNA processing; P:RNA modification; F:RNA binding; F:pseudouridine synthase activity
000001F|arrow.g148.t1	procyclic acidic repetitive protein PARP	578	0	85.83					no GO terms	no GO terms
000001F|arrow.g149.t1	rRNA-processing protein EBP2	365	0	84.24	P:GO:0042254; C:GO:0005730	P:ribosome biogenesis; C:nucleolus			no GO terms	no GO terms
000001F|arrow.g150.t1	heat shock factor binding protein 1-domain-containing protein	82	6.10457e-38	77.46	P:GO:0009058; P:GO:0034641; F:GO:0003674	P:biosynthetic process; P:cellular nitrogen compound metabolic process; F:molecular_function			F:GO:0003714	F:transcription corepressor activity
000001F|arrow.g151.t1	protein disulfide-isomerase tigA	367	0	93.29	F:GO:0004518; F:GO:0016853; C:GO:0005783	F:nuclease activity; F:isomerase activity; C:endoplasmic reticulum	EC:5.3.4.1; EC:3.1; EC:5.3; EC:3; EC:5.3.4; EC:5	Protein disulfide-isomerase; Acting on ester bonds; Intramolecular oxidoreductases; Hydrolases; Intramolecular oxidoreductases; Isomerases	F:GO:0003756; C:GO:0005783	F:protein disulfide isomerase activity; C:endoplasmic reticulum
000001F|arrow.g152.t1	XPG I-region protein	721	0	93.1	F:GO:0004518; F:GO:0016853; C:GO:0005575	F:nuclease activity; F:isomerase activity; C:cellular_component	EC:5.3.4.1; EC:3.1; EC:5.3; EC:3; EC:5.3.4; EC:5	Protein disulfide-isomerase; Acting on ester bonds; Intramolecular oxidoreductases; Hydrolases; Intramolecular oxidoreductases; Isomerases	F:GO:0004518	F:nuclease activity
000001F|arrow.g153.t1	oxidoreductase, 2OG-Fe(II) oxygenase family	349	0	82.9	F:GO:0016491; F:GO:0043167	F:oxidoreductase activity; F:ion binding	EC:1	Oxidoreductases	F:GO:0016491	F:oxidoreductase activity
000001F|arrow.g154.t1	MYND-type zinc finger protein samB	603	0	92.02	P:GO:0030154; P:GO:0048646; F:GO:0043167; C:GO:0005737	P:cell differentiation; P:anatomical structure formation involved in morphogenesis; F:ion binding; C:cytoplasm			no GO terms	no GO terms
000001F|arrow.g155.t1	WD40-repeat-containing domain protein	353	0	99.92	P:GO:0007165; F:GO:0003674	P:signal transduction; F:molecular_function			P:GO:0007165; F:GO:0005515	P:signal transduction; F:protein binding
000001F|arrow.g156.t1	phosducin	276	4.20197e-176	86.43	P:GO:0007165	P:signal transduction			P:GO:0008277	P:regulation of G protein-coupled receptor signaling pathway
000001F|arrow.g157.t1	transcription initiation factor IIF, auxiliary subunit	231	1.44662e-169	98.23	P:GO:0006810; P:GO:0051276; F:GO:0008135; C:GO:0000228; C:GO:0005654; C:GO:0032991	P:transport; P:chromosome organization; F:translation factor activity, RNA binding; C:nuclear chromosome; C:nucleoplasm; C:protein-containing complex			P:GO:0006355	P:regulation of transcription, DNA-templated
000001F|arrow.g158.t1	ran-specific GTPase-activating protein 1	236	6.96117e-169	89.68	P:GO:0006810; P:GO:0009058; P:GO:0034641	P:transport; P:biosynthetic process; P:cellular nitrogen compound metabolic process			P:GO:0046907	P:intracellular transport
000001F|arrow.g159.t1	hypothetical protein ATETN484_0004015800	794	0	76.8	C:GO:0005575	C:cellular_component			no GO terms	no GO terms
000001F|arrow.g160.t1	glycolipid 2-alpha-mannosyltransferase-domain-containing protein	505	0	97.11	P:GO:0006464; P:GO:0009058; F:GO:0016757; C:GO:0005575	P:cellular protein modification process; P:biosynthetic process; F:transferase activity, transferring glycosyl groups; C:cellular_component	EC:2.4; EC:2; EC:2.4.1	Glycosyltransferases; Transferases; Glycosyltransferases	P:GO:0006486; F:GO:0000030; C:GO:0016020	P:protein glycosylation; F:mannosyltransferase activity; C:membrane
000001F|arrow.g161.t1	uncharacterized PH domain-containing protein PB16A4.02c	407	0	85.88	F:GO:0016757	F:transferase activity, transferring glycosyl groups	EC:2.4; EC:2	Glycosyltransferases; Transferases	no GO terms	no GO terms
000001F|arrow.g162.t1	integral membrane protein	414	0	83.59	F:GO:0022857; C:GO:0031410	F:transmembrane transporter activity; C:cytoplasmic vesicle	EC:7	Translocases	C:GO:0016020; C:GO:0016021	C:membrane; C:integral component of membrane
000001F|arrow.g163.t1	small GTPase superfamily	191	8.64382e-124	89.96	F:GO:0003924; F:GO:0043167	F:GTPase activity; F:ion binding	EC:3.6.1; EC:3.6; EC:3; EC:3.6.1.15	Acting on acid anhydrides; Acting on acid anhydrides; Hydrolases; Nucleoside-triphosphate phosphatase	F:GO:0003924; F:GO:0005525	F:GTPase activity; F:GTP binding
000001F|arrow.g164.t1	autophagy-related protein 16	199	3.89218e-103	79.88					no GO terms	no GO terms
000001F|arrow.g165.t1	S-adenosyl-L-methionine-dependent methyltransferase	503	0	93.1	P:GO:0006259; P:GO:0006464; P:GO:0006950; P:GO:0007049; P:GO:0009058; P:GO:0051276; F:GO:0008168; F:GO:0042393; F:GO:0043167; C:GO:0005634; C:GO:0005694	P:DNA metabolic process; P:cellular protein modification process; P:response to stress; P:cell cycle; P:biosynthetic process; P:chromosome organization; F:methyltransferase activity; F:histone binding; F:ion binding; C:nucleus; C:chromosome	EC:2.1; EC:2.1.1.43; EC:2; EC:2.1.1	Transferring one-carbon groups; Transferring one-carbon groups; Transferases; Transferring one-carbon groups	P:GO:0000077; P:GO:0006281; P:GO:0006348; P:GO:0034729; P:GO:0051726; F:GO:0018024; F:GO:0031151; F:GO:0031493; C:GO:0005634	P:DNA damage checkpoint; P:DNA repair; P:chromatin silencing at telomere; P:histone H3-K79 methylation; P:regulation of cell cycle; F:histone-lysine N-methyltransferase activity; F:histone methyltransferase activity (H3-K79 specific); F:nucleosomal histone binding; C:nucleus
000001F|arrow.g166.t1	thiamine diphosphate-binding protein	114	6.27877e-55	77.52	F:GO:0016491; F:GO:0016829; F:GO:0043167	F:oxidoreductase activity; F:lyase activity; F:ion binding	EC:2.6.1; EC:4.1.1; EC:4.1.1.1; EC:4.1; EC:1; EC:2; EC:2.6; EC:4	Transferring nitrogenous groups; Carbon-carbon lyases; Pyruvate decarboxylase; Carbon-carbon lyases; Oxidoreductases; Transferases; Transferring nitrogenous groups; Lyases	F:GO:0000287; F:GO:0003824; F:GO:0016831; F:GO:0030976	F:magnesium ion binding; F:catalytic activity; F:carboxy-lyase activity; F:thiamine pyrophosphate binding
000001F|arrow.g167.t1	thiamine diphosphate-binding protein	140	8.92732e-81	77.53	F:GO:0016829; F:GO:0043167; C:GO:0005575	F:lyase activity; F:ion binding; C:cellular_component	EC:2.6.1; EC:4.1.1; EC:4.1.1.1; EC:4.1; EC:2; EC:2.6; EC:4	Transferring nitrogenous groups; Carbon-carbon lyases; Pyruvate decarboxylase; Carbon-carbon lyases; Transferases; Transferring nitrogenous groups; Lyases	F:GO:0016831; F:GO:0030976	F:carboxy-lyase activity; F:thiamine pyrophosphate binding
000001F|arrow.g168.t1	major facilitator superfamily domain-containing protein	443	0	83.6	P:GO:0009058; P:GO:0034641; F:GO:0003677; F:GO:0003700; F:GO:0022857; F:GO:0043167; C:GO:0005575	P:biosynthetic process; P:cellular nitrogen compound metabolic process; F:DNA binding; F:DNA-binding transcription factor activity; F:transmembrane transporter activity; F:ion binding; C:cellular_component	EC:7	Translocases	P:GO:0055085; F:GO:0022857	P:transmembrane transport; F:transmembrane transporter activity
000001F|arrow.g169.t1	Spb1 C-terminal domain-containing protein	794	0	92.22	P:GO:0034641; P:GO:0042254; F:GO:0008168; C:GO:0005730; C:GO:0032991	P:cellular nitrogen compound metabolic process; P:ribosome biogenesis; F:methyltransferase activity; C:nucleolus; C:protein-containing complex	EC:2.1; EC:2; EC:2.1.1	Transferring one-carbon groups; Transferases; Transferring one-carbon groups	P:GO:0001510; P:GO:0006364; P:GO:0031167; P:GO:0032259; F:GO:0008168; F:GO:0008649; C:GO:0005634	P:RNA methylation; P:rRNA processing; P:rRNA methylation; P:methylation; F:methyltransferase activity; F:rRNA methyltransferase activity; C:nucleus
000001F|arrow.g170.t1	conserved hypothetical protein	842	0	77.89	P:GO:0008150; F:GO:0003674; C:GO:0005575	P:biological_process; F:molecular_function; C:cellular_component			no GO terms	no GO terms
000001F|arrow.g171.t1	C6 zinc finger domain protein	728	0	88.28	P:GO:0009058; P:GO:0034641; F:GO:0003677; F:GO:0003700; F:GO:0043167	P:biosynthetic process; P:cellular nitrogen compound metabolic process; F:DNA binding; F:DNA-binding transcription factor activity; F:ion binding			P:GO:0006351; P:GO:0006355; F:GO:0000981; F:GO:0003677; F:GO:0008270	P:transcription, DNA-templated; P:regulation of transcription, DNA-templated; F:DNA-binding transcription factor activity, RNA polymerase II-specific; F:DNA binding; F:zinc ion binding
000001F|arrow.g172.t1	increased rDNA silencing protein 4	565	0	61.67	F:GO:0003674	F:molecular_function			F:GO:0005515	F:protein binding
000001F|arrow.g173.t1	DNA ligase (ATP)	2025	0	87.15	P:GO:0006259; P:GO:0006950; P:GO:0009058; F:GO:0003677; F:GO:0003700; F:GO:0016874; F:GO:0043167	P:DNA metabolic process; P:response to stress; P:biosynthetic process; F:DNA binding; F:DNA-binding transcription factor activity; F:ligase activity; F:ion binding	EC:6.5; EC:6; EC:6.5.1.1	Forming phosphoric ester bonds; Ligases; DNA ligase (ATP)	P:GO:0006281; P:GO:0006310; P:GO:0006351; P:GO:0006355; P:GO:0051103; P:GO:0071897; F:GO:0000981; F:GO:0003677; F:GO:0003909; F:GO:0003910; F:GO:0005524; F:GO:0008270	P:DNA repair; P:DNA recombination; P:transcription, DNA-templated; P:regulation of transcription, DNA-templated; P:DNA ligation involved in DNA repair; P:DNA biosynthetic process; F:DNA-binding transcription factor activity, RNA polymerase II-specific; F:DNA binding; F:DNA ligase activity; F:DNA ligase (ATP) activity; F:ATP binding; F:zinc ion binding
000001F|arrow.g174.t1	hypothetical protein ATETN484_0004017500	495	0	79.49	P:GO:0008150; F:GO:0003674; C:GO:0005575	P:biological_process; F:molecular_function; C:cellular_component			no GO terms	no GO terms
000001F|arrow.g175.t1	fungal-specific transcription factor domain-containing protein	826	0	83.01	P:GO:0009058; P:GO:0034641; F:GO:0003677; F:GO:0003700; F:GO:0043167	P:biosynthetic process; P:cellular nitrogen compound metabolic process; F:DNA binding; F:DNA-binding transcription factor activity; F:ion binding			P:GO:0006351; F:GO:0003677; F:GO:0008270	P:transcription, DNA-templated; F:DNA binding; F:zinc ion binding
000001F|arrow.g176.t1	putative serine/threonine protein phosphatase	451	0	94.32	P:GO:0006464; F:GO:0016791	P:cellular protein modification process; F:phosphatase activity	EC:3.1.3.16; EC:3.1; EC:3; EC:3.1.3	Protein-serine/threonine phosphatase; Acting on ester bonds; Hydrolases; Acting on ester bonds	F:GO:0016787	F:hydrolase activity
000001F|arrow.g177.t1	Dol-P-Man:Man(5)GlcNAc(2)-PP-Dol alpha-1,3-mannosyltransferase	412	0	87.27	P:GO:0006464; P:GO:0009058; F:GO:0016757; C:GO:0005783	P:cellular protein modification process; P:biosynthetic process; F:transferase activity, transferring glycosyl groups; C:endoplasmic reticulum	EC:2.4; EC:2; EC:2.4.1.258; EC:2.4.1	Glycosyltransferases; Transferases; Dolichyl-P-Man:Man(5)GlcNAc(2)-PP-dolichol alpha-1,3-mannosyltransferase; Glycosyltransferases	F:GO:0000030	F:mannosyltransferase activity
000001F|arrow.g178.t1	eukaryotic initiation factor 1A	136	1.10898e-93	92.6	F:GO:0008135	F:translation factor activity, RNA binding			P:GO:0006413; F:GO:0003723; F:GO:0003743	P:translational initiation; F:RNA binding; F:translation initiation factor activity
000001F|arrow.g179.t1	MFS efflux transporter, putative	486	0	85.36	F:GO:0022857; C:GO:0005575	F:transmembrane transporter activity; C:cellular_component	EC:7	Translocases	P:GO:0055085; F:GO:0022857	P:transmembrane transport; F:transmembrane transporter activity
000001F|arrow.g180.t1	protein kinase c	1099	0	92.27	P:GO:0006464; P:GO:0007165; P:GO:0071554; F:GO:0016301; F:GO:0043167	P:cellular protein modification process; P:signal transduction; P:cell wall organization or biogenesis; F:kinase activity; F:ion binding	EC:2.7.1; EC:2.7.11; EC:2.7.11.13; EC:2.7; EC:2	Transferring phosphorus-containing groups; Transferring phosphorus-containing groups; Protein kinase C; Transferring phosphorus-containing groups; Transferases	P:GO:0006468; P:GO:0007165; P:GO:0009272; P:GO:0035556; F:GO:0004672; F:GO:0004674; F:GO:0004697; F:GO:0005524	P:protein phosphorylation; P:signal transduction; P:fungal-type cell wall biogenesis; P:intracellular signal transduction; F:protein kinase activity; F:protein serine/threonine kinase activity; F:protein kinase C activity; F:ATP binding
000001F|arrow.g181.t1	tubulin folding cofactor D C terminal-domain-containing protein	1901	0	85.98	P:GO:0006457; P:GO:0065003; F:GO:0003723; F:GO:0008092; F:GO:0030234	P:protein folding; P:protein-containing complex assembly; F:RNA binding; F:cytoskeletal protein binding; F:enzyme regulator activity			P:GO:0007021; P:GO:0007023; F:GO:0003676; F:GO:0005096; F:GO:0048487	P:tubulin complex assembly; P:post-chaperonin tubulin folding pathway; F:nucleic acid binding; F:GTPase activator activity; F:beta-tubulin binding
000001F|arrow.g182.t1	V-type proton ATPase subunit D	260	0	95.63	F:GO:0016887; F:GO:0022857	F:ATPase activity; F:transmembrane transporter activity	EC:3.6.1; EC:3.6; EC:3; EC:7.2.2; EC:7; EC:3.6.1.15	Acting on acid anhydrides; Acting on acid anhydrides; Hydrolases; Catalysing the translocation of inorganic cations; Translocases; Nucleoside-triphosphate phosphatase	F:GO:0042626	F:ATPase-coupled transmembrane transporter activity
000001F|arrow.g183.t1	pre-mRNA-splicing factor syf1	835	0	97.31	P:GO:0006397; F:GO:0003674	P:mRNA processing; F:molecular_function			P:GO:0006396; F:GO:0005515	P:RNA processing; F:protein binding
000001F|arrow.g184.t1	Sec7-domain-containing protein	1580	0	92.77	P:GO:0007165; F:GO:0030234	P:signal transduction; F:enzyme regulator activity			P:GO:0032012; F:GO:0005085	P:regulation of ARF protein signal transduction; F:guanyl-nucleotide exchange factor activity
000001F|arrow.g185.t1	Rho guanyl nucleotide exchange factor	1504	0	82.9	F:GO:0030234	F:enzyme regulator activity			F:GO:0005085	F:guanyl-nucleotide exchange factor activity
000001F|arrow.g186.t1	WD repeat protein	1656	0	78.37	P:GO:0006399; F:GO:0016874; F:GO:0043167	P:tRNA metabolic process; F:ligase activity; F:ion binding	EC:6.3; EC:6	Forming carbon-nitrogen bonds; Ligases	P:GO:0008033; F:GO:0000166; F:GO:0005515; F:GO:0005524; F:GO:0016879	P:tRNA processing; F:nucleotide binding; F:protein binding; F:ATP binding; F:ligase activity, forming carbon-nitrogen bonds
000001F|arrow.g187.t1	mitochondrial carrier domain-containing protein	327	0	90.83	P:GO:0006464; F:GO:0016301; F:GO:0043167; C:GO:0005575	P:cellular protein modification process; F:kinase activity; F:ion binding; C:cellular_component	EC:2.7.1; EC:2.7; EC:2	Transferring phosphorus-containing groups; Transferring phosphorus-containing groups; Transferases	no GO terms	no GO terms
000001F|arrow.g188.t1	kinase-like domain-containing protein	808	0	87.36	P:GO:0006464; F:GO:0016301; F:GO:0043167; C:GO:0005575	P:cellular protein modification process; F:kinase activity; F:ion binding; C:cellular_component	EC:2.7.1; EC:2.7.11; EC:2.7; EC:2	Transferring phosphorus-containing groups; Transferring phosphorus-containing groups; Transferring phosphorus-containing groups; Transferases	P:GO:0006468; F:GO:0004672; F:GO:0005524	P:protein phosphorylation; F:protein kinase activity; F:ATP binding
000001F|arrow.g189.t1	ribosomal protein L11, N-terminal domain-containing protein	153	4.5349e-109	97.71	P:GO:0006412; F:GO:0003735; C:GO:0005840	P:translation; F:structural constituent of ribosome; C:ribosome			P:GO:0006412; F:GO:0003735; C:GO:0005840	P:translation; F:structural constituent of ribosome; C:ribosome
000001F|arrow.g190.t1	oxidative stress survival, Svf1-like protein	378	0	94.69	P:GO:0006950; C:GO:0005737	P:response to stress; C:cytoplasm			P:GO:0006979	P:response to oxidative stress
000001F|arrow.g191.t1	dynein heavy chain, N-terminal region 1-domain-containing protein	4301	0	95.21	P:GO:0008150; F:GO:0016887; F:GO:0043167; C:GO:0005737; C:GO:0005856; C:GO:0032991	P:biological_process; F:ATPase activity; F:ion binding; C:cytoplasm; C:cytoskeleton; C:protein-containing complex	EC:3.6.1; EC:3.6; EC:3; EC:5.6.1.4; EC:3.6.1.15	Acting on acid anhydrides; Acting on acid anhydrides; Hydrolases; Minus-end-directed kinesin ATPase; Nucleoside-triphosphate phosphatase	P:GO:0007018; F:GO:0005524; F:GO:0008569; C:GO:0030286	P:microtubule-based movement; F:ATP binding; F:ATP-dependent microtubule motor activity, minus-end-directed; C:dynein complex
000001F|arrow.g192.t1	dicer-like protein 1	1427	0	79.62	P:GO:0002376; P:GO:0006950; F:GO:0003677; F:GO:0003723; F:GO:0004386; F:GO:0004518; F:GO:0043167	P:immune system process; P:response to stress; F:DNA binding; F:RNA binding; F:helicase activity; F:nuclease activity; F:ion binding	EC:3.1.30; EC:3.6.1; EC:3.1; EC:3.6; EC:3; EC:3.1.26; EC:3.1.26.3; EC:3.6.1.15	Acting on ester bonds; Acting on acid anhydrides; Acting on ester bonds; Acting on acid anhydrides; Hydrolases; Acting on ester bonds; Ribonuclease III; Nucleoside-triphosphate phosphatase	P:GO:0006396; F:GO:0003677; F:GO:0004525; F:GO:0005524; F:GO:0016787; F:GO:0016891	P:RNA processing; F:DNA binding; F:ribonuclease III activity; F:ATP binding; F:hydrolase activity; F:endoribonuclease activity, producing 5'-phosphomonoesters
000001F|arrow.g193.t1	TAP42-like protein	355	0	93.29	P:GO:0007165	P:signal transduction			P:GO:0009966	P:regulation of signal transduction
000001F|arrow.g194.t1	porphobilinogen deaminase	342	0	91.51	P:GO:0006464; P:GO:0009058; P:GO:0034641; F:GO:0016765	P:cellular protein modification process; P:biosynthetic process; P:cellular nitrogen compound metabolic process; F:transferase activity, transferring alkyl or aryl (other than methyl) groups	EC:2.5.1; EC:2.5; EC:2; EC:2.5.1.61	Transferring alkyl or aryl groups, other than methyl groups; Transferring alkyl or aryl groups, other than methyl groups; Transferases; Hydroxymethylbilane synthase	P:GO:0018160; P:GO:0033014; F:GO:0004418	P:peptidyl-pyrromethane cofactor linkage; P:tetrapyrrole biosynthetic process; F:hydroxymethylbilane synthase activity
000001F|arrow.g195.t1	ATP-dependent protease La	931	0	95.57	P:GO:0006605; P:GO:0009056; P:GO:0051604; P:GO:0055085; F:GO:0008233; F:GO:0016887; F:GO:0043167; C:GO:0005777	P:protein targeting; P:catabolic process; P:protein maturation; P:transmembrane transport; F:peptidase activity; F:ATPase activity; F:ion binding; C:peroxisome	EC:3.4.21.73; EC:3.4.24.7; EC:3.4.21.71; EC:3.4.24.3; EC:3.4.21.34; EC:3.4.21.78; EC:3.4.21.75; EC:3.4.21.26; EC:3.4.21.27; EC:3.4.21.68; EC:3.4.21.69; EC:3.4.24.34; EC:3.4.21.41; EC:3.4.21.83; EC:3.4.21.88; EC:3.4.21.45; EC:3.4.21.89; EC:3.4.21.42; EC:3.4.19.1; EC:3.4.21.43; EC:3.4.21.87; EC:3.4.21.38; EC:3.4.21.35; EC:3.4.21.79; EC:3.6.1; EC:3.4.21.36; EC:3.4.21.102; EC:3.4.21.39; EC:3.4.21; EC…	U-plasminogen activator; Interstitial collagenase; Pancreatic elastase II; Microbial collagenase; Plasma kallikrein; Granzyme A; Furin; Prolyl oligopeptidase; Coagulation factor XIa; T-plasminogen activator; Protein C (activated); Neutrophil collagenase; Complement subcomponent C1r; Oligopeptidase B; Repressor LexA; Complement factor I; Signal peptidase I; Complement subcomponent C1s; Acylaminoac…	P:GO:0006508; P:GO:0006515; P:GO:0030163; F:GO:0004176; F:GO:0004252; F:GO:0005524; F:GO:0016887	P:proteolysis; P:protein quality control for misfolded or incompletely synthesized proteins; P:protein catabolic process; F:ATP-dependent peptidase activity; F:serine-type endopeptidase activity; F:ATP binding; F:ATPase activity
000001F|arrow.g196.t1	ribosomal protein L23-domain-containing protein	204	1.83027e-143	91.27	P:GO:0006412; F:GO:0003735; C:GO:0005840	P:translation; F:structural constituent of ribosome; C:ribosome			P:GO:0006412; F:GO:0003735; C:GO:0005840	P:translation; F:structural constituent of ribosome; C:ribosome
000001F|arrow.g197.t1	serine/threonine-protein kinase RIO2	402	0	91.16	P:GO:0006464; P:GO:0006913; P:GO:0034641; P:GO:0042254; F:GO:0016301; F:GO:0043167; C:GO:0005829; C:GO:0032991	P:cellular protein modification process; P:nucleocytoplasmic transport; P:cellular nitrogen compound metabolic process; P:ribosome biogenesis; F:kinase activity; F:ion binding; C:cytosol; C:protein-containing complex	EC:2.7.1; EC:2.7.11; EC:2.7.11.1; EC:2.7; EC:2	Transferring phosphorus-containing groups; Transferring phosphorus-containing groups; Non-specific serine/threonine protein kinase; Transferring phosphorus-containing groups; Transferases	P:GO:0006468; F:GO:0004672; F:GO:0004674; F:GO:0005524	P:protein phosphorylation; F:protein kinase activity; F:protein serine/threonine kinase activity; F:ATP binding
000001F|arrow.g198.t1	26S proteasome regulatory complex, non-ATPase subcomplex, Rpn1 subunit	907	0	97.51	P:GO:0009056; F:GO:0030234; C:GO:0005622; C:GO:0032991	P:catabolic process; F:enzyme regulator activity; C:intracellular anatomical structure; C:protein-containing complex			P:GO:0042176; F:GO:0030234; C:GO:0000502	P:regulation of protein catabolic process; F:enzyme regulator activity; C:proteasome complex
000001F|arrow.g199.t1	26S proteasome regulatory complex, non-ATPase subcomplex, Rpn1 subunit	671	0	77	P:GO:0009056; F:GO:0030234; C:GO:0032991	P:catabolic process; F:enzyme regulator activity; C:protein-containing complex			no GO terms	no GO terms
000001F|arrow.g200.t1	DNA mismatch repair protein Mlh1	724	0	86.95	P:GO:0006259; P:GO:0006950; F:GO:0003677; F:GO:0016887; F:GO:0043167; C:GO:0005622; C:GO:0032991	P:DNA metabolic process; P:response to stress; F:DNA binding; F:ATPase activity; F:ion binding; C:intracellular anatomical structure; C:protein-containing complex	EC:3.6.1; EC:3.6; EC:3; EC:3.6.1.15	Acting on acid anhydrides; Acting on acid anhydrides; Hydrolases; Nucleoside-triphosphate phosphatase	P:GO:0006298; F:GO:0005524; F:GO:0016887; F:GO:0030983; C:GO:0032300	P:mismatch repair; F:ATP binding; F:ATPase activity; F:mismatched DNA binding; C:mismatch repair complex
000001F|arrow.g201.t1	protein tyrosine phosphatase Pps1	678	0	90.64	P:GO:0006464; F:GO:0016791	P:cellular protein modification process; F:phosphatase activity	EC:3.1; EC:3.1.3.48; EC:3; EC:3.1.3	Acting on ester bonds; Protein-tyrosine-phosphatase; Hydrolases; Acting on ester bonds	P:GO:0006470; P:GO:0016311; F:GO:0004725; F:GO:0008138; F:GO:0016791	P:protein dephosphorylation; P:dephosphorylation; F:protein tyrosine phosphatase activity; F:protein tyrosine/serine/threonine phosphatase activity; F:phosphatase activity
000001F|arrow.g202.t1	leucine carboxyl methyltransferase	1033	0	84.29	P:GO:0006399; F:GO:0008168	P:tRNA metabolic process; F:methyltransferase activity	EC:2.1; EC:2; EC:2.1.1	Transferring one-carbon groups; Transferases; Transferring one-carbon groups	P:GO:0032259; F:GO:0005515; F:GO:0008168	P:methylation; F:protein binding; F:methyltransferase activity
000001F|arrow.g203.t1	autophagy-related protein 18	429	0	94.7	P:GO:0006914; P:GO:0015031; F:GO:0003674; C:GO:0005768; C:GO:0005773	P:autophagy; P:protein transport; F:molecular_function; C:endosome; C:vacuole			F:GO:0005515	F:protein binding
000001F|arrow.g204.t1	S-adenosyl-L-methionine-dependent methyltransferase	364	0	83.14	P:GO:0006399; P:GO:0009058; F:GO:0008168; C:GO:0005737	P:tRNA metabolic process; P:biosynthetic process; F:methyltransferase activity; C:cytoplasm	EC:2.1; EC:2; EC:2.1.1	Transferring one-carbon groups; Transferases; Transferring one-carbon groups	P:GO:0031591; F:GO:0008757	P:wybutosine biosynthetic process; F:S-adenosylmethionine-dependent methyltransferase activity
000001F|arrow.g205.t1	predicted protein	93	1.87112e-53	67.77					no GO terms	no GO terms
000001F|arrow.g206.t1	EF hand domain containing protein	202	2.83125e-143	90.36	F:GO:0043167	F:ion binding			F:GO:0005509	F:calcium ion binding
000001F|arrow.g207.t1	predicted protein	740	0	77.69	F:GO:0003674	F:molecular_function			F:GO:0005515	F:protein binding
000001F|arrow.g208.t1	pre-mRNA splicing factor ATP-dependent RNA helicase PRP43	765	0	96.95	P:GO:0006397; F:GO:0004386; F:GO:0043167; C:GO:0005634; C:GO:0032991	P:mRNA processing; F:helicase activity; F:ion binding; C:nucleus; C:protein-containing complex	EC:3.6.1; EC:3.6; EC:3; EC:3.6.1.15	Acting on acid anhydrides; Acting on acid anhydrides; Hydrolases; Nucleoside-triphosphate phosphatase	F:GO:0003676; F:GO:0004386; F:GO:0005524	F:nucleic acid binding; F:helicase activity; F:ATP binding
000001F|arrow.g209.t1	protein methyltransferase RmtC	873	0	88.04	P:GO:0006464; F:GO:0008168; F:GO:0016301	P:cellular protein modification process; F:methyltransferase activity; F:kinase activity	EC:2.1; EC:2.7; EC:2; EC:2.1.1	Transferring one-carbon groups; Transferring phosphorus-containing groups; Transferases; Transferring one-carbon groups	P:GO:0006479; P:GO:0018216; P:GO:0035246; F:GO:0008168; F:GO:0016274	P:protein methylation; P:peptidyl-arginine methylation; P:peptidyl-arginine N-methylation; F:methyltransferase activity; F:protein-arginine N-methyltransferase activity
000001F|arrow.g210.t1	myosin-binding striated muscle assembly central-domain-containing protein	834	0	91.81	C:GO:0005737	C:cytoplasm			no GO terms	no GO terms
000001F|arrow.g211.t1	GDPD-domain-containing protein	1196	0	92.56	P:GO:0006629; P:GO:0009056; F:GO:0003674; C:GO:0005737	P:lipid metabolic process; P:catabolic process; F:molecular_function; C:cytoplasm	EC:3.1.4; EC:3.1; EC:3; EC:3.1.4.2	Acting on ester bonds; Acting on ester bonds; Hydrolases; Glycerophosphocholine phosphodiesterase	P:GO:0006629; P:GO:0046475; F:GO:0005515; F:GO:0008081; F:GO:0047389	P:lipid metabolic process; P:glycerophospholipid catabolic process; F:protein binding; F:phosphoric diester hydrolase activity; F:glycerophosphocholine phosphodiesterase activity
000001F|arrow.g212.t1	transcription factor TFIIH subunit Tfb4, putative	387	0	86.81	P:GO:0006259; P:GO:0006464; P:GO:0006950; P:GO:0009058; C:GO:0005654; C:GO:0032991	P:DNA metabolic process; P:cellular protein modification process; P:response to stress; P:biosynthetic process; C:nucleoplasm; C:protein-containing complex			P:GO:0006289; P:GO:0006355; C:GO:0000439	P:nucleotide-excision repair; P:regulation of transcription, DNA-templated; C:transcription factor TFIIH core complex
000001F|arrow.g213.t1	nucleophile aminohydrolase	511	0	77.91	F:GO:0008233	F:peptidase activity	EC:3.4.99; EC:3.4; EC:3.4.25; EC:3	Acting on peptide bonds (peptidases); Acting on peptide bonds (peptidases); Acting on peptide bonds (peptidases); Hydrolases	F:GO:0004298; F:GO:0016787	F:threonine-type endopeptidase activity; F:hydrolase activity
000001F|arrow.g214.t1	putative arp3, actin-related protein 3	438	0	98.13	P:GO:0007010; P:GO:0065003; F:GO:0043167; C:GO:0005856; C:GO:0032991	P:cytoskeleton organization; P:protein-containing complex assembly; F:ion binding; C:cytoskeleton; C:protein-containing complex			P:GO:0007015; P:GO:0034314; F:GO:0005524; C:GO:0005885	P:actin filament organization; P:Arp2/3 complex-mediated actin nucleation; F:ATP binding; C:Arp2/3 protein complex
000001F|arrow.g215.t1	S-adenosyl-L-methionine-dependent methyltransferase	581	0	86.74	P:GO:0006399; F:GO:0008168	P:tRNA metabolic process; F:methyltransferase activity	EC:2.1.1.35; EC:2.1; EC:2; EC:2.1.1	tRNA (uracil(54)-C(5))-methyltransferase; Transferring one-carbon groups; Transferases; Transferring one-carbon groups	P:GO:0006396; P:GO:0008033; F:GO:0008173; F:GO:0030697	P:RNA processing; P:tRNA processing; F:RNA methyltransferase activity; F:S-adenosylmethionine-dependent tRNA (m5U54) methyltransferase activity
000001F|arrow.g216.t1	ribosomal protein S5, C-terminal domain-containing protein	413	0	90.76	P:GO:0006412; F:GO:0003723; F:GO:0003735; C:GO:0005840; C:GO:0032991	P:translation; F:RNA binding; F:structural constituent of ribosome; C:ribosome; C:protein-containing complex			P:GO:0006412; F:GO:0003723; F:GO:0003735; C:GO:0005840	P:translation; F:RNA binding; F:structural constituent of ribosome; C:ribosome
000001F|arrow.g217.t1	DASH complex subunit Dad3-domain-containing protein	138	8.85868e-74	84.33	P:GO:0007049; P:GO:0007059; P:GO:0051301; C:GO:0000228; C:GO:0005737; C:GO:0005856; C:GO:0032991	P:cell cycle; P:chromosome segregation; P:cell division; C:nuclear chromosome; C:cytoplasm; C:cytoskeleton; C:protein-containing complex			P:GO:0008608; C:GO:0042729; C:GO:0072686	P:attachment of spindle microtubules to kinetochore; C:DASH complex; C:mitotic spindle
000001F|arrow.g218.t1	serine/threonine-protein kinase nrc-2	624	0	93.99	P:GO:0006464; F:GO:0016301; F:GO:0043167	P:cellular protein modification process; F:kinase activity; F:ion binding	EC:2.7.1; EC:2.7.11; EC:2.7; EC:2	Transferring phosphorus-containing groups; Transferring phosphorus-containing groups; Transferring phosphorus-containing groups; Transferases	P:GO:0006468; F:GO:0004672; F:GO:0005524	P:protein phosphorylation; F:protein kinase activity; F:ATP binding
000001F|arrow.g219.t1	histidine phosphatase superfamily	575	0	77.16	C:GO:0005575	C:cellular_component			no GO terms	no GO terms
000001F|arrow.g220.t1	telomere repeat binding factor-domain-containing protein	844	0	85.21	P:GO:0007049; F:GO:0003677	P:cell cycle; F:DNA binding			F:GO:0042162; F:GO:0042803	F:telomeric DNA binding; F:protein homodimerization activity
000001F|arrow.g221.t1	TFIID and and SAGA complex TAF10 subunit, putative	267	3.12437e-125	81.77	F:GO:0008135; C:GO:0005634	F:translation factor activity, RNA binding; C:nucleus			P:GO:0006352; C:GO:0005634	P:DNA-templated transcription, initiation; C:nucleus
000001F|arrow.g222.t1	37S ribosomal protein S19	94	3.28892e-61	94.43	P:GO:0006412; P:GO:0044281; F:GO:0003723; F:GO:0003735; F:GO:0016301; C:GO:0005840	P:translation; P:small molecule metabolic process; F:RNA binding; F:structural constituent of ribosome; F:kinase activity; C:ribosome	EC:2.7; EC:2	Transferring phosphorus-containing groups; Transferases	P:GO:0006412; F:GO:0003723; F:GO:0003735; C:GO:0005840	P:translation; F:RNA binding; F:structural constituent of ribosome; C:ribosome
000001F|arrow.g223.t1	inositol polyphosphate multikinase	435	0	86.83	P:GO:0006412; P:GO:0044281; F:GO:0003723; F:GO:0003735; F:GO:0016301; C:GO:0005840	P:translation; P:small molecule metabolic process; F:RNA binding; F:structural constituent of ribosome; F:kinase activity; C:ribosome	EC:2.7; EC:2	Transferring phosphorus-containing groups; Transferases	P:GO:0032958; F:GO:0016301	P:inositol phosphate biosynthetic process; F:kinase activity
000001F|arrow.g224.t1	argonaute-binding protein	437	0	80.91	P:GO:0008150; C:GO:0005634; C:GO:0032991	P:biological_process; C:nucleus; C:protein-containing complex			P:GO:0031047; C:GO:0033167	P:gene silencing by RNA; C:ARC complex
000001F|arrow.g225.t1	quinone oxidoreductase	332	0	95.92	F:GO:0016491; F:GO:0043167	F:oxidoreductase activity; F:ion binding	EC:1	Oxidoreductases	F:GO:0008270; F:GO:0016491	F:zinc ion binding; F:oxidoreductase activity
000001F|arrow.g226.t1	predicted protein	586	3.19257e-151	73.83					no GO terms	no GO terms
000001F|arrow.g227.t1	SGNH hydrolase-type esterase domain-containing protein	335	0	84.96	F:GO:0003674	F:molecular_function	EC:3.1; EC:3; EC:3.1.1; EC:3.1.1.1	Acting on ester bonds; Hydrolases; Acting on ester bonds; Carboxylesterase	F:GO:0052689	F:carboxylic ester hydrolase activity
000001F|arrow.g228.t1	predicted protein	338	0	82.9	P:GO:0009058; P:GO:0034641; F:GO:0003677; F:GO:0003700; F:GO:0043167	P:biosynthetic process; P:cellular nitrogen compound metabolic process; F:DNA binding; F:DNA-binding transcription factor activity; F:ion binding	EC:3.1; EC:3; EC:3.1.1; EC:3.1.1.1	Acting on ester bonds; Hydrolases; Acting on ester bonds; Carboxylesterase	no GO terms	no GO terms
000001F|arrow.g229.t1	S-adenosyl-L-methionine-dependent methyltransferase	266	0	87.35	P:GO:0008150; F:GO:0008168	P:biological_process; F:methyltransferase activity	EC:2.1; EC:2; EC:2.1.1	Transferring one-carbon groups; Transferases; Transferring one-carbon groups	no GO terms	no GO terms
000001F|arrow.g230.t1	quinone oxidoreductase	84	8.54811e-52	88.83					no IPS match	no IPS match
000001F|arrow.g231.t1	putative cutinase 1	217	1.51135e-138	81.89	F:GO:0003674; C:GO:0005576	F:molecular_function; C:extracellular region	EC:3.1; EC:3; EC:3.1.1.74; EC:3.1.1; EC:3.1.1.1	Acting on ester bonds; Hydrolases; Cutinase; Acting on ester bonds; Carboxylesterase	F:GO:0016787; F:GO:0050525; C:GO:0005576	F:hydrolase activity; F:cutinase activity; C:extracellular region
000001F|arrow.g232.t1	uncharacterized protein ATNIH1004_005484	243	4.33499e-46	46.43					no IPS match	no IPS match
000001F|arrow.g233.t1	iron/ascorbate family oxidoreductase	373	0	90.29	F:GO:0016491	F:oxidoreductase activity	EC:1	Oxidoreductases	F:GO:0016491	F:oxidoreductase activity
000001F|arrow.g234.t1	MFS transporter	1021	0	87	C:GO:0005575	C:cellular_component			no GO terms	no GO terms
000001F|arrow.g235.t1	Sodium/calcium exchanger protein-domain-containing protein	728	0	83.51	P:GO:0055085; C:GO:0005575	P:transmembrane transport; C:cellular_component			P:GO:0055085; C:GO:0016021	P:transmembrane transport; C:integral component of membrane
000001F|arrow.g236.t1	predicted protein	218	1.10084e-68	72.52	F:GO:0003674	F:molecular_function	EC:3	Hydrolases	F:GO:0005515	F:protein binding
000001F|arrow.g237.t1	ankyrin repeat protein	531	0	70.27	P:GO:0005975; P:GO:0009056; F:GO:0016798	P:carbohydrate metabolic process; P:catabolic process; F:hydrolase activity, acting on glycosyl bonds	EC:3.2; EC:3; EC:3.2.1	Glycosylases; Hydrolases; Glycosylases	F:GO:0005515	F:protein binding
000001F|arrow.g238.t1	calcium-activated chloride channel-domain-containing protein	728	0	85.76	C:GO:0005575	C:cellular_component			no GO terms	no GO terms
000001F|arrow.g239.t1	predicted protein	226	2.77169e-68	76.29					no GO terms	no GO terms
000001F|arrow.g240.t1	integral membrane protein	454	0	78.69	C:GO:0005575	C:cellular_component			no GO terms	no GO terms
000001F|arrow.g241.t1	DUF1212 domain membrane protein	813	0	76.82	C:GO:0005575	C:cellular_component			no GO terms	no GO terms
000001F|arrow.g242.t1	short chain dehydrogenase/ reductase	598	0	83.28	F:GO:0016491	F:oxidoreductase activity	EC:1; EC:2	Oxidoreductases; Transferases	F:GO:0016491	F:oxidoreductase activity
000001F|arrow.g243.t1	xylitol dehydrogenase	399	0	76.24	F:GO:0016491; F:GO:0043167	F:oxidoreductase activity; F:ion binding	EC:1	Oxidoreductases	F:GO:0008270; F:GO:0016491	F:zinc ion binding; F:oxidoreductase activity
000001F|arrow.g244.t1	GPI anchored protein	192	6.65894e-81	67.44					no GO terms	no GO terms
000001F|arrow.g245.t1	amino acid/polyamine transporter I	534	0	93.73	F:GO:0022857; C:GO:0005575	F:transmembrane transporter activity; C:cellular_component	EC:7	Translocases	P:GO:0055085; F:GO:0022857; C:GO:0016020	P:transmembrane transport; F:transmembrane transporter activity; C:membrane
000001F|arrow.g246.t1	fungal-specific transcription factor domain-containing protein	224	4.63829e-60	70.75	P:GO:0009058; P:GO:0034641; F:GO:0043167	P:biosynthetic process; P:cellular nitrogen compound metabolic process; F:ion binding			no GO terms	no GO terms
000001F|arrow.g247.t1	non-ribosomal peptide synthase	2383	0	66.34	F:GO:0003674	F:molecular_function			F:GO:0003824; F:GO:0031177	F:catalytic activity; F:phosphopantetheine binding
000001F|arrow.g248.t1	non-ribosomal peptide synthase	1314	0	63.24	F:GO:0003674	F:molecular_function			F:GO:0003824; F:GO:0031177	F:catalytic activity; F:phosphopantetheine binding
000001F|arrow.g249.t1	aquaporin-like protein	345	0	91.53	F:GO:0022857; C:GO:0005575	F:transmembrane transporter activity; C:cellular_component	EC:7	Translocases	P:GO:0055085; F:GO:0015267; C:GO:0016020	P:transmembrane transport; F:channel activity; C:membrane
000001F|arrow.g250.t1	globin-like protein	415	0	87.31	P:GO:0006810; P:GO:0006950; F:GO:0016491; F:GO:0043167; C:GO:0005829	P:transport; P:response to stress; F:oxidoreductase activity; F:ion binding; C:cytosol	EC:1.14.12; EC:1.14.12.17; EC:1.5; EC:1; EC:1.14; EC:1.5.1.30; EC:1.5.1.41; EC:1.5.1	Acting on paired donors, with incorporation or reduction of molecular oxygen. The oxygen incorporated need not be derived from O(2); Nitric oxide dioxygenase; Acting on the CH-NH group of donors; Oxidoreductases; Acting on paired donors, with incorporation or reduction of molecular oxygen. The oxygen incorporated need not be derived from O(2); Flavin reductase (NADPH); Riboflavin reductase (NAD(P…	P:GO:0051409; F:GO:0008941; F:GO:0016491; F:GO:0019825; F:GO:0020037; F:GO:0071949	P:response to nitrosative stress; F:nitric oxide dioxygenase activity; F:oxidoreductase activity; F:oxygen binding; F:heme binding; F:FAD binding
000001F|arrow.g251.t1	predicted protein	374	0	83.08	P:GO:0008150; F:GO:0003674; C:GO:0005575	P:biological_process; F:molecular_function; C:cellular_component			no GO terms	no GO terms
000001F|arrow.g252.t1	triphenylmethane reductase TMR-like protein NMRa-like atypical a SDR	314	1.63365e-171	84.34					no GO terms	no GO terms
000001F|arrow.g253.t1	HLH DNA binding domain protein, putative	299	3.24486e-173	76.21	F:GO:0003674	F:molecular_function			F:GO:0046983	F:protein dimerization activity
000001F|arrow.g254.t1	Tripeptidyl-peptidase sed2	601	0	86.2	F:GO:0008233; F:GO:0043167; C:GO:0005615	F:peptidase activity; F:ion binding; C:extracellular space	EC:3.4.21.73; EC:3.4.24.7; EC:3.4.21.71; EC:3.4.24.3; EC:3.4.21.34; EC:3.4.21.78; EC:3.4.21.75; EC:3.4.21.26; EC:3.4.21.27; EC:3.4.21.68; EC:3.4.21.69; EC:3.4.24.34; EC:3.4.21.41; EC:3.4.21.83; EC:3.4.21.88; EC:3.4.21.45; EC:3.4.21.89; EC:3.4.21.42; EC:3.4.19.1; EC:3.4.21.43; EC:3.4.21.87; EC:3.4.21.38; EC:3.4.21.35; EC:3.4.21.79; EC:3.4.21.36; EC:3.4.21.102; EC:3.4.21.39; EC:3.4.21; EC:3.4.21.4;…	U-plasminogen activator; Interstitial collagenase; Pancreatic elastase II; Microbial collagenase; Plasma kallikrein; Granzyme A; Furin; Prolyl oligopeptidase; Coagulation factor XIa; T-plasminogen activator; Protein C (activated); Neutrophil collagenase; Complement subcomponent C1r; Oligopeptidase B; Repressor LexA; Complement factor I; Signal peptidase I; Complement subcomponent C1s; Acylaminoac…	P:GO:0006508; F:GO:0004252; F:GO:0008236	P:proteolysis; F:serine-type endopeptidase activity; F:serine-type peptidase activity
000001F|arrow.g255.t1	predicted protein	301	1.92748e-05	50.47	P:GO:0006508; F:GO:0004252; F:GO:0008233; F:GO:0008236; F:GO:0016787; F:GO:0046872; C:GO:0005615	P:proteolysis; F:serine-type endopeptidase activity; F:peptidase activity; F:serine-type peptidase activity; F:hydrolase activity; F:metal ion binding; C:extracellular space			no GO terms	no GO terms
000001F|arrow.g256.t1	predicted protein	238	7.59505e-87	71.42					no GO terms	no GO terms
000001F|arrow.g257.t1	histidinol dehydrogenase	443	0	97.04	P:GO:0006520; P:GO:0009058; F:GO:0016491; F:GO:0043167	P:cellular amino acid metabolic process; P:biosynthetic process; F:oxidoreductase activity; F:ion binding	EC:1.1; EC:1; EC:1.1.1.23; EC:1.1.1	Acting on the CH-OH group of donors; Oxidoreductases; Histidinol dehydrogenase; Acting on the CH-OH group of donors	P:GO:0000105; F:GO:0004399; F:GO:0016491; F:GO:0016616; F:GO:0046872; F:GO:0051287	P:histidine biosynthetic process; F:histidinol dehydrogenase activity; F:oxidoreductase activity; F:oxidoreductase activity, acting on the CH-OH group of donors, NAD or NADP as acceptor; F:metal ion binding; F:NAD binding
000001F|arrow.g258.t1	toxin biosynthesis protein	436	0	76.75	F:GO:0016787	F:hydrolase activity			no GO terms	no GO terms
000001F|arrow.g259.t1	putative C6 transcription factor RegA [Aspergillus nomiae NRRL 13137]	780	0	81.55	P:GO:0009058; P:GO:0034641; F:GO:0003677; F:GO:0003700; F:GO:0043167	P:biosynthetic process; P:cellular nitrogen compound metabolic process; F:DNA binding; F:DNA-binding transcription factor activity; F:ion binding			P:GO:0006351; F:GO:0003677; F:GO:0008270	P:transcription, DNA-templated; F:DNA binding; F:zinc ion binding
000001F|arrow.g260.t1	amino acid/polyamine transporter I	540	0	93.46	F:GO:0022857; C:GO:0005575	F:transmembrane transporter activity; C:cellular_component	EC:7	Translocases	P:GO:0006865; P:GO:0055085; F:GO:0022857; C:GO:0016020; C:GO:0016021	P:amino acid transport; P:transmembrane transport; F:transmembrane transporter activity; C:membrane; C:integral component of membrane
000001F|arrow.g261.t1	putative integral membrane protein	300	1.59655e-171	75.96	C:GO:0005575	C:cellular_component			no GO terms	no GO terms
000001F|arrow.g262.t1	probable feruloyl esterase C	271	6.26244e-172	90.79	P:GO:0005975; P:GO:0009056; P:GO:0019748; P:GO:0071554; F:GO:0008233; F:GO:0016798; C:GO:0005576	P:carbohydrate metabolic process; P:catabolic process; P:secondary metabolic process; P:cell wall organization or biogenesis; F:peptidase activity; F:hydrolase activity, acting on glycosyl bonds; C:extracellular region	EC:3.2; EC:3.1; EC:3.4; EC:3; EC:3.1.1.73; EC:3.1.1; EC:3.1.1.1; EC:3.2.1	Glycosylases; Acting on ester bonds; Acting on peptide bonds (peptidases); Hydrolases; Feruloyl esterase; Acting on ester bonds; Carboxylesterase; Glycosylases	P:GO:0006508; F:GO:0008236; F:GO:0030600	P:proteolysis; F:serine-type peptidase activity; F:feruloyl esterase activity
000001F|arrow.g263.t1	HAD-like domain-containing protein	264	1.64153e-151	87.11	F:GO:0003674	F:molecular_function	EC:3.8.1; EC:3; EC:3.8	Acting on halide bonds; Hydrolases; Acting on halide bonds	F:GO:0016787; F:GO:0019120	F:hydrolase activity; F:hydrolase activity, acting on acid halide bonds, in C-halide compounds
000001F|arrow.g264.t1	putative alpha-galactosidase D	1170	0	84.79	P:GO:0005975; P:GO:0009056; F:GO:0016798; F:GO:0022857; C:GO:0005576	P:carbohydrate metabolic process; P:catabolic process; F:hydrolase activity, acting on glycosyl bonds; F:transmembrane transporter activity; C:extracellular region	EC:3.2; EC:3; EC:3.2.1.22; EC:7; EC:3.2.1	Glycosylases; Hydrolases; Alpha-galactosidase; Translocases; Glycosylases	P:GO:0005975; P:GO:0055085; F:GO:0003824; F:GO:0004553; F:GO:0022857	P:carbohydrate metabolic process; P:transmembrane transport; F:catalytic activity; F:hydrolase activity, hydrolyzing O-glycosyl compounds; F:transmembrane transporter activity
000001F|arrow.g265.t1	CCCH zinc finger DNA binding protein	486	1.43093e-174	68.14	F:GO:0046872	F:metal ion binding			no GO terms	no GO terms
000001F|arrow.g266.t1	dihydroxy-acid dehydratase	596	0	95.73	P:GO:0006520; P:GO:0009058; F:GO:0016829; F:GO:0043167	P:cellular amino acid metabolic process; P:biosynthetic process; F:lyase activity; F:ion binding	EC:4.2.1; EC:4.2; EC:4; EC:4.2.1.9	Carbon-oxygen lyases; Carbon-oxygen lyases; Lyases; Dihydroxy-acid dehydratase	P:GO:0009082; F:GO:0003824; F:GO:0004160	P:branched-chain amino acid biosynthetic process; F:catalytic activity; F:dihydroxy-acid dehydratase activity
000001F|arrow.g267.t1	MFS transporter	432	0	85.43	F:GO:0022857; C:GO:0005575	F:transmembrane transporter activity; C:cellular_component	EC:7	Translocases	P:GO:0055085; F:GO:0022857	P:transmembrane transport; F:transmembrane transporter activity
000001F|arrow.g268.t1	DUF427-domain-containing protein	220	2.73417e-110	69.71	P:GO:0016310; F:GO:0016301	P:phosphorylation; F:kinase activity			no GO terms	no GO terms
000001F|arrow.g269.t1	hypothetical protein ATETN484_0004026000	152	2.11894e-75	74.47	C:GO:0005575	C:cellular_component			no IPS match	no IPS match
000001F|arrow.g270.t1	acetyltransferase, GNAT family family	222	3.36965e-101	60.01	F:GO:0016746; F:GO:0022857; C:GO:0005575	F:transferase activity, transferring acyl groups; F:transmembrane transporter activity; C:cellular_component	EC:2.3; EC:2; EC:7; EC:2.3.1	Acyltransferases; Transferases; Translocases; Acyltransferases	F:GO:0008080	F:N-acetyltransferase activity
000001F|arrow.g271.t1	phosphate permease	480	0	74.14	F:GO:0022857; C:GO:0005575	F:transmembrane transporter activity; C:cellular_component	EC:7	Translocases	P:GO:0055085; F:GO:0022857; C:GO:0016021	P:transmembrane transport; F:transmembrane transporter activity; C:integral component of membrane
000001F|arrow.g272.t1	predicted protein	418	0	76.96	C:GO:0005575	C:cellular_component			no GO terms	no GO terms
000001F|arrow.g273.t1	MNNG and nitrosoguanidine resistance protein	454	0	88.12	C:GO:0005575	C:cellular_component			no GO terms	no GO terms
000001F|arrow.g274.t1	sterol 24-C-methyltransferase	396	0	90.81	P:GO:0006629; P:GO:0009058; F:GO:0008168	P:lipid metabolic process; P:biosynthetic process; F:methyltransferase activity	EC:2.1; EC:2; EC:2.1.1.41; EC:2.1.1	Transferring one-carbon groups; Transferases; Sterol 24-C-methyltransferase; Transferring one-carbon groups	P:GO:0006694; F:GO:0008168	P:steroid biosynthetic process; F:methyltransferase activity
000001F|arrow.g275.t1	pre-mRNA-splicing factor slt11	388	0	91.23	F:GO:0003723	F:RNA binding			F:GO:0003676; F:GO:0003723	F:nucleic acid binding; F:RNA binding
000001F|arrow.g276.t1	mitochondrial complex I protein Fmp36	114	5.4695e-77	94.1	P:GO:0006457; P:GO:0007005; P:GO:0065003; F:GO:0003674; C:GO:0005739	P:protein folding; P:mitochondrion organization; P:protein-containing complex assembly; F:molecular_function; C:mitochondrion			no GO terms	no GO terms
000001F|arrow.g277.t1	DnaJ domain-containing protein	446	0	93.94	P:GO:0006412; P:GO:0006457; P:GO:0006913; P:GO:0006950; P:GO:0008219; P:GO:0015031; P:GO:0042254; F:GO:0003674; C:GO:0005730; C:GO:0005737; C:GO:0005840; C:GO:0032991	P:translation; P:protein folding; P:nucleocytoplasmic transport; P:response to stress; P:cell death; P:protein transport; P:ribosome biogenesis; F:molecular_function; C:nucleolus; C:cytoplasm; C:ribosome; C:protein-containing complex			P:GO:0006450; P:GO:0051083; F:GO:0030544; F:GO:0043022	P:regulation of translational fidelity; P:'de novo' cotranslational protein folding; F:Hsp70 protein binding; F:ribosome binding
000001F|arrow.g278.t1	heterokaryon incompatibility protein-domain-containing protein	268	6.80659e-33	45.23					no IPS match	no IPS match
000001F|arrow.g279.t1	MFS general substrate transporter	877	0	72.54	P:GO:0006464; F:GO:0016301; F:GO:0022857; C:GO:0005575	P:cellular protein modification process; F:kinase activity; F:transmembrane transporter activity; C:cellular_component	EC:2.7.1; EC:2.7; EC:2; EC:7	Transferring phosphorus-containing groups; Transferring phosphorus-containing groups; Transferases; Translocases	P:GO:0006468; P:GO:0055085; F:GO:0004672; F:GO:0022857	P:protein phosphorylation; P:transmembrane transport; F:protein kinase activity; F:transmembrane transporter activity
000001F|arrow.g280.t1	acid phosphatase	416	0	93.54	F:GO:0003674	F:molecular_function	EC:3.1; EC:3	Acting on ester bonds; Hydrolases	F:GO:0016788	F:hydrolase activity, acting on ester bonds
000001F|arrow.g281.t1	glutamine synthetase	479	0	92.65	P:GO:0006520; P:GO:0009058; F:GO:0016874	P:cellular amino acid metabolic process; P:biosynthetic process; F:ligase activity	EC:6.3; EC:6.3.1; EC:6; EC:6.3.1.2	Forming carbon-nitrogen bonds; Forming carbon-nitrogen bonds; Ligases; Glutamine synthetase	P:GO:0006542; P:GO:0006807; F:GO:0003824; F:GO:0004356	P:glutamine biosynthetic process; P:nitrogen compound metabolic process; F:catalytic activity; F:glutamate-ammonia ligase activity
000001F|arrow.g282.t1	putative glutamine amidotransferase-like protein C13C5.04	245	4.83655e-173	82.64	P:GO:0006520; F:GO:0016491	P:cellular amino acid metabolic process; F:oxidoreductase activity	EC:1.2; EC:1; EC:2; EC:1.2.1	Acting on the aldehyde or oxo group of donors; Oxidoreductases; Transferases; Acting on the aldehyde or oxo group of donors	no GO terms	no GO terms
000001F|arrow.g283.t1	aldehyde dehydrogenase family protein	463	0	93.27	P:GO:0006520; F:GO:0016491	P:cellular amino acid metabolic process; F:oxidoreductase activity	EC:1.2; EC:1; EC:1.2.1	Acting on the aldehyde or oxo group of donors; Oxidoreductases; Acting on the aldehyde or oxo group of donors	F:GO:0016491; F:GO:0016620	F:oxidoreductase activity; F:oxidoreductase activity, acting on the aldehyde or oxo group of donors, NAD or NADP as acceptor
000001F|arrow.g284.t1	oxidoreductase	277	0	96.48	F:GO:0016491	F:oxidoreductase activity	EC:1	Oxidoreductases	F:GO:0016491	F:oxidoreductase activity
000001F|arrow.g285.t1	acid phosphatase	490	0	86.99	P:GO:0009058; P:GO:0034641; F:GO:0003677; F:GO:0003700; F:GO:0043167	P:biosynthetic process; P:cellular nitrogen compound metabolic process; F:DNA binding; F:DNA-binding transcription factor activity; F:ion binding	EC:3.1; EC:3	Acting on ester bonds; Hydrolases	no GO terms	no GO terms
000001F|arrow.g286.t1	oxidoreductase	207	1.32587e-43	69.09	P:GO:0006355; P:GO:0006357; P:GO:0055114; F:GO:0000981; F:GO:0003677; F:GO:0008270; C:GO:0005634	P:regulation of transcription, DNA-templated; P:regulation of transcription by RNA polymerase II; P:obsolete oxidation-reduction process; F:DNA-binding transcription factor activity, RNA polymerase II-specific; F:DNA binding; F:zinc ion binding; C:nucleus			no GO terms	no GO terms
000001F|arrow.g287.t1	type-1 glutamine synthetase 2	392	0	87.84	P:GO:0006520; P:GO:0009056; F:GO:0016829	P:cellular amino acid metabolic process; P:catabolic process; F:lyase activity	EC:4.3; EC:4.3.1.18; EC:4; EC:4.3.1	Carbon-nitrogen lyases; D-serine ammonia-lyase; Lyases; Carbon-nitrogen lyases	no GO terms	no GO terms
000001F|arrow.g288.t1	dienelactone hydrolase	474	0	88.34	F:GO:0003674	F:molecular_function	EC:3	Hydrolases	no GO terms	no GO terms
000001F|arrow.g289.t1	tumor suppressor protein, LOH1CR12	459	0	67.59	P:GO:0030001; P:GO:0055085; F:GO:0046873; C:GO:0016020; C:GO:0016021	P:metal ion transport; P:transmembrane transport; F:metal ion transmembrane transporter activity; C:membrane; C:integral component of membrane			no GO terms	no GO terms
000001F|arrow.g290.t1	putative MFS transporter	586	0	86.52	F:GO:0022857; C:GO:0005575	F:transmembrane transporter activity; C:cellular_component	EC:7	Translocases	P:GO:0055085; F:GO:0022857	P:transmembrane transport; F:transmembrane transporter activity
000001F|arrow.g291.t1	major facilitator superfamily domain-containing protein	483	0	92.43	F:GO:0022857; C:GO:0005575	F:transmembrane transporter activity; C:cellular_component	EC:7	Translocases	P:GO:0055085; F:GO:0022857	P:transmembrane transport; F:transmembrane transporter activity
000001F|arrow.g292.t1	glycine dehydrogenase	1065	0	96.25	P:GO:0006520; P:GO:0009056; F:GO:0016491	P:cellular amino acid metabolic process; P:catabolic process; F:oxidoreductase activity	EC:1.4; EC:1.4.4; EC:1; EC:1.4.4.2	Acting on the CH-NH(2) group of donors; Acting on the CH-NH(2) group of donors; Oxidoreductases; Glycine dehydrogenase (aminomethyl-transferring)	P:GO:0006544; P:GO:0006546; F:GO:0003824; F:GO:0004375	P:glycine metabolic process; P:glycine catabolic process; F:catalytic activity; F:glycine dehydrogenase (decarboxylating) activity
000001F|arrow.g293.t1	chlorohydrolase family protein	533	0	77.82	P:GO:0006520; F:GO:0016491; F:GO:0016810; C:GO:0005575	P:cellular amino acid metabolic process; F:oxidoreductase activity; F:hydrolase activity, acting on carbon-nitrogen (but not peptide) bonds; C:cellular_component	EC:1; EC:3.5; EC:3	Oxidoreductases; Acting on carbon-nitrogen bonds, other than peptide bonds; Hydrolases	F:GO:0016787; F:GO:0016810	F:hydrolase activity; F:hydrolase activity, acting on carbon-nitrogen (but not peptide) bonds
000001F|arrow.g294.t1	rhamnogalacturonate lyase A	528	0	94.65	P:GO:0005975; P:GO:0009056; P:GO:0071554; F:GO:0016829; C:GO:0005576	P:carbohydrate metabolic process; P:catabolic process; P:cell wall organization or biogenesis; F:lyase activity; C:extracellular region	EC:4.2.2.23; EC:4.2; EC:4; EC:4.2.2	Rhamnogalacturonan endolyase; Carbon-oxygen lyases; Lyases; Carbon-oxygen lyases	P:GO:0005975; F:GO:0003824; F:GO:0016837; F:GO:0030246	P:carbohydrate metabolic process; F:catalytic activity; F:carbon-oxygen lyase activity, acting on polysaccharides; F:carbohydrate binding
000001F|arrow.g295.t1	serine peptidase, family S28	565	0	74.9	F:GO:0008233	F:peptidase activity	EC:3.4; EC:3	Acting on peptide bonds (peptidases); Hydrolases	P:GO:0006508; F:GO:0008236	P:proteolysis; F:serine-type peptidase activity
000001F|arrow.g296.t1	cytochrome P450 52A12	510	0	88.92	F:GO:0016491; F:GO:0043167; C:GO:0005575	F:oxidoreductase activity; F:ion binding; C:cellular_component	EC:1; EC:1.14.14; EC:1.14	Oxidoreductases; Acting on paired donors, with incorporation or reduction of molecular oxygen. The oxygen incorporated need not be derived from O(2); Acting on paired donors, with incorporation or reduction of molecular oxygen. The oxygen incorporated need not be derived from O(2)	F:GO:0004497; F:GO:0005506; F:GO:0016705; F:GO:0016712; F:GO:0020037	F:monooxygenase activity; F:iron ion binding; F:oxidoreductase activity, acting on paired donors, with incorporation or reduction of molecular oxygen; F:oxidoreductase activity, acting on paired donors, with incorporation or reduction of molecular oxygen, reduced flavin or flavoprotein as one donor, and incorporation of one atom of oxygen; F:heme binding
000001F|arrow.g297.t1	mediator complex subunit 27-domain-containing protein	360	0	70.86	C:GO:0005634; C:GO:0032991	C:nucleus; C:protein-containing complex			C:GO:0016592	C:mediator complex
000001F|arrow.g298.t1	hypothetical protein ATETN484_0004029400	172	2.10313e-94	61.71					no IPS match	no IPS match
000001F|arrow.g299.t1	predicted protein	277	1.90429e-162	77.43	C:GO:0005575	C:cellular_component			no GO terms	no GO terms
000001F|arrow.g300.t1	predicted protein	169	2.64583e-103	76.31	P:GO:0008150; F:GO:0003674	P:biological_process; F:molecular_function			no GO terms	no GO terms
000001F|arrow.g301.t1	SNF2 family N-terminal domain-containing protein	1199	0	88.48	F:GO:0003677; F:GO:0016887; F:GO:0043167	F:DNA binding; F:ATPase activity; F:ion binding	EC:3.6.1; EC:3.6; EC:3; EC:3.6.1.15	Acting on acid anhydrides; Acting on acid anhydrides; Hydrolases; Nucleoside-triphosphate phosphatase	F:GO:0005524; F:GO:0070615	F:ATP binding; F:nucleosome-dependent ATPase activity
000001F|arrow.g302.t1	kinase-like domain-containing protein	894	0	94.28	P:GO:0006464; F:GO:0016301; F:GO:0043167	P:cellular protein modification process; F:kinase activity; F:ion binding	EC:2.7.1; EC:2.7; EC:2	Transferring phosphorus-containing groups; Transferring phosphorus-containing groups; Transferases	P:GO:0006468; F:GO:0004672; F:GO:0005524	P:protein phosphorylation; F:protein kinase activity; F:ATP binding
000001F|arrow.g303.t1	eukaryotic translation initiation factor 3 subunit EifCc	864	0	95.36	P:GO:0022618; F:GO:0008135; C:GO:0005737; C:GO:0032991	P:ribonucleoprotein complex assembly; F:translation factor activity, RNA binding; C:cytoplasm; C:protein-containing complex			P:GO:0006413; F:GO:0003723; F:GO:0003743; F:GO:0031369; C:GO:0005852	P:translational initiation; F:RNA binding; F:translation initiation factor activity; F:translation initiation factor binding; C:eukaryotic translation initiation factor 3 complex
000001F|arrow.g304.t1	EAP30/Vps36 family-domain-containing protein	257	0	95.38	P:GO:0015031; P:GO:0016192; C:GO:0005768; C:GO:0032991	P:protein transport; P:vesicle-mediated transport; C:endosome; C:protein-containing complex			P:GO:0071985; C:GO:0000814	P:multivesicular body sorting pathway; C:ESCRT II complex
000001F|arrow.g305.t1	60S ribosomal protein L7	251	0	98.36	P:GO:0034641; P:GO:0042254; F:GO:0003735; C:GO:0005829; C:GO:0005840; C:GO:0032991	P:cellular nitrogen compound metabolic process; P:ribosome biogenesis; F:structural constituent of ribosome; C:cytosol; C:ribosome; C:protein-containing complex			P:GO:0000463; F:GO:0003735; C:GO:0022625	P:maturation of LSU-rRNA from tricistronic rRNA transcript (SSU-rRNA, 5.8S rRNA, LSU-rRNA); F:structural constituent of ribosome; C:cytosolic large ribosomal subunit
000001F|arrow.g306.t1	NAD(P)-binding protein	345	0	89.29	F:GO:0016491	F:oxidoreductase activity	EC:1	Oxidoreductases	F:GO:0016491	F:oxidoreductase activity
000001F|arrow.g307.t1	predicted protein	217	4.40036e-157	83.88	C:GO:0005575	C:cellular_component			no GO terms	no GO terms
000001F|arrow.g308.t1	putative feruloyl esterase B-2	525	0	76.74	P:GO:0005975; P:GO:0009056; P:GO:0071554; F:GO:0043167; C:GO:0005576	P:carbohydrate metabolic process; P:catabolic process; P:cell wall organization or biogenesis; F:ion binding; C:extracellular region	EC:3.1; EC:3; EC:3.1.1.73; EC:3.1.1; EC:3.1.1.1	Acting on ester bonds; Hydrolases; Feruloyl esterase; Acting on ester bonds; Carboxylesterase	no GO terms	no GO terms
000001F|arrow.g309.t1	hypothetical protein BDW42DRAFT_166821	387	0	78.94					no GO terms	no GO terms
000001F|arrow.g310.t1	hypothetical protein ACN38_g304	546	0	65.79					no GO terms	no GO terms
000001F|arrow.g311.t1	ent-kaurene oxidase	547	0	81.38	F:GO:0016491; F:GO:0043167; C:GO:0005575	F:oxidoreductase activity; F:ion binding; C:cellular_component	EC:1; EC:1.14	Oxidoreductases; Acting on paired donors, with incorporation or reduction of molecular oxygen. The oxygen incorporated need not be derived from O(2)	F:GO:0005506; F:GO:0016705; F:GO:0020037	F:iron ion binding; F:oxidoreductase activity, acting on paired donors, with incorporation or reduction of molecular oxygen; F:heme binding
000001F|arrow.g312.t1	uncharacterized nucleolar protein C2C4.08	343	0	85.22	C:GO:0005575	C:cellular_component			no GO terms	no GO terms
000001F|arrow.g313.t1	fungal-specific transcription factor domain-containing protein	612	0	68.22	P:GO:0009058; P:GO:0034641; F:GO:0003677; F:GO:0043167	P:biosynthetic process; P:cellular nitrogen compound metabolic process; F:DNA binding; F:ion binding			P:GO:0006351; F:GO:0003677; F:GO:0008270	P:transcription, DNA-templated; F:DNA binding; F:zinc ion binding
000001F|arrow.g314.t1	FAD binding domain-containing protein	567	0	86.84	F:GO:0016491; F:GO:0043167	F:oxidoreductase activity; F:ion binding	EC:1	Oxidoreductases	F:GO:0071949	F:FAD binding
000001F|arrow.g315.t1	acyl transferase	477	0	87.33	F:GO:0016746	F:transferase activity, transferring acyl groups	EC:2.3; EC:2; EC:2.3.1	Acyltransferases; Transferases; Acyltransferases	F:GO:0016747	F:transferase activity, transferring acyl groups other than amino-acyl groups
000001F|arrow.g316.t1	L-lactate dehydrogenase	313	0	82.08	P:GO:0005975; P:GO:0044281; F:GO:0016491; C:GO:0005575	P:carbohydrate metabolic process; P:small molecule metabolic process; F:oxidoreductase activity; C:cellular_component	EC:1.1; EC:1; EC:2.7; EC:2; EC:1.1.1	Acting on the CH-OH group of donors; Oxidoreductases; Transferring phosphorus-containing groups; Transferases; Acting on the CH-OH group of donors	P:GO:0005975; P:GO:0019752; F:GO:0003824; F:GO:0016491; F:GO:0016616	P:carbohydrate metabolic process; P:carboxylic acid metabolic process; F:catalytic activity; F:oxidoreductase activity; F:oxidoreductase activity, acting on the CH-OH group of donors, NAD or NADP as acceptor
000001F|arrow.g317.t1	phosphoenolpyruvate synthase	800	0	89.82	P:GO:0005975; P:GO:0009058; P:GO:0044281; F:GO:0016301; F:GO:0016491; F:GO:0043167	P:carbohydrate metabolic process; P:biosynthetic process; P:small molecule metabolic process; F:kinase activity; F:oxidoreductase activity; F:ion binding	EC:1.1; EC:2.7.9.2; EC:1; EC:2.7; EC:2; EC:1.1.1; EC:2.7.9	Acting on the CH-OH group of donors; Pyruvate, water dikinase; Oxidoreductases; Transferring phosphorus-containing groups; Transferases; Acting on the CH-OH group of donors; Transferring phosphorus-containing groups	P:GO:0006090; P:GO:0016310; F:GO:0003824; F:GO:0005524; F:GO:0008986; F:GO:0016301; F:GO:0016772	P:pyruvate metabolic process; P:phosphorylation; F:catalytic activity; F:ATP binding; F:pyruvate, water dikinase activity; F:kinase activity; F:transferase activity, transferring phosphorus-containing groups
000001F|arrow.g318.t1	uridine/cytidine kinase	320	0	88.98	F:GO:0016301	F:kinase activity	EC:2.7; EC:2; EC:3	Transferring phosphorus-containing groups; Transferases; Hydrolases	no GO terms	no GO terms
000001F|arrow.g319.t1	peroxisomal hydratase-dehydrogenase-epimerase	902	0	96.4	P:GO:0006629; P:GO:0009056; P:GO:0044281; F:GO:0016491; F:GO:0016829; F:GO:0016853; C:GO:0005777	P:lipid metabolic process; P:catabolic process; P:small molecule metabolic process; F:oxidoreductase activity; F:lyase activity; F:isomerase activity; C:peroxisome	EC:4.2.1; EC:1.1; EC:1; EC:4.2; EC:2; EC:1.1.1.35; EC:4; EC:1.1.1; EC:5; EC:4.2.1.17	Carbon-oxygen lyases; Acting on the CH-OH group of donors; Oxidoreductases; Carbon-oxygen lyases; Transferases; 3-hydroxyacyl-CoA dehydrogenase; Lyases; Acting on the CH-OH group of donors; Isomerases; Enoyl-CoA hydratase	F:GO:0016491	F:oxidoreductase activity
000001F|arrow.g320.t1	RING finger protein	724	0	79.39	F:GO:0043167; C:GO:0005575	F:ion binding; C:cellular_component			no GO terms	no GO terms
000001F|arrow.g321.t1	MFS drug transporter	597	0	88.46	F:GO:0022857; C:GO:0005575	F:transmembrane transporter activity; C:cellular_component	EC:7	Translocases	P:GO:0055085; F:GO:0022857	P:transmembrane transport; F:transmembrane transporter activity
000001F|arrow.g322.t1	tryptophan synthase beta subunit-like PLP-dependent enzyme	522	0	92.28					no GO terms	no GO terms
000001F|arrow.g323.t1	ferric-chelate reductase	607	0	79	P:GO:0006810; F:GO:0016491; C:GO:0005575	P:transport; F:oxidoreductase activity; C:cellular_component	EC:1.16; EC:1; EC:1.16.1; EC:1.16.1.7	Oxidizing metal ions; Oxidoreductases; Oxidizing metal ions; Ferric-chelate reductase (NADH)	F:GO:0000293; F:GO:0016491; C:GO:0016021	F:ferric-chelate reductase activity; F:oxidoreductase activity; C:integral component of membrane
000001F|arrow.g324.t1	predicted protein	111	9.14089e-50	67.85					no IPS match	no IPS match
000001F|arrow.g325.t1	glycoside hydrolase superfamily	385	0	82.97	P:GO:0005975; F:GO:0016798	P:carbohydrate metabolic process; F:hydrolase activity, acting on glycosyl bonds	EC:3.2; EC:3; EC:3.2.1	Glycosylases; Hydrolases; Glycosylases	P:GO:0071704; F:GO:0004553	P:organic substance metabolic process; F:hydrolase activity, hydrolyzing O-glycosyl compounds
000001F|arrow.g326.t1	SAC3/GANP/Nin1/mts3/eIF-3 p25 family-domain-containing protein	516	0	91.17	P:GO:0008150; F:GO:0003674; C:GO:0005575	P:biological_process; F:molecular_function; C:cellular_component			no GO terms	no GO terms
000001F|arrow.g327.t1	vacuolar protein sorting protein	622	0	86.46	P:GO:0016192; F:GO:0008289; F:GO:0032182; F:GO:0043167; C:GO:0005768; C:GO:0032991	P:vesicle-mediated transport; F:lipid binding; F:ubiquitin-like protein binding; F:ion binding; C:endosome; C:protein-containing complex			P:GO:0032509; F:GO:0032266; F:GO:0043130; C:GO:0000814	P:endosome transport via multivesicular body sorting pathway; F:phosphatidylinositol-3-phosphate binding; F:ubiquitin binding; C:ESCRT II complex
000001F|arrow.g328.t1	conserved serine-threonine rich protein	667	0	58.09	P:GO:0006812; P:GO:0055085; P:GO:0098655; F:GO:0008324; C:GO:0016020; C:GO:0016021	P:cation transport; P:transmembrane transport; P:cation transmembrane transport; F:cation transmembrane transporter activity; C:membrane; C:integral component of membrane			no GO terms	no GO terms
000001F|arrow.g329.t1	hypothetical protein ATETN484_0004032500	522	0	69.81					no GO terms	no GO terms
000001F|arrow.g330.t1	predicted protein	210	3.62613e-85	83.47					no GO terms	no GO terms
000001F|arrow.g331.t1	LysM domain protein	192	4.18643e-71	71.25	F:GO:0003674	F:molecular_function			no GO terms	no GO terms
000001F|arrow.g332.t1	YjgF-like protein	135	1.008e-87	90.58					no GO terms	no GO terms
000001F|arrow.g333.t1	signaling mucin MSB2	769	0	68.48	P:GO:0006950; P:GO:0007165; F:GO:0003674; C:GO:0005886	P:response to stress; P:signal transduction; F:molecular_function; C:plasma membrane			P:GO:0007232; F:GO:0005034; C:GO:0005887	P:osmosensory signaling pathway via Sho1 osmosensor; F:osmosensor activity; C:integral component of plasma membrane
000001F|arrow.g334.t1	mitochondrial 18 KDa protein-domain-containing protein	311	0	84.28	C:GO:0005575	C:cellular_component			no GO terms	no GO terms
000001F|arrow.g335.t1	glycerol-3-phosphate dehydrogenase [NAD+]	409	0	85.96	P:GO:0005975; P:GO:0009056; F:GO:0016491; C:GO:0005737; C:GO:0032991	P:carbohydrate metabolic process; P:catabolic process; F:oxidoreductase activity; C:cytoplasm; C:protein-containing complex	EC:1.1; EC:1.1.1.8; EC:1; EC:1.1.1; EC:1.1.1.94	Acting on the CH-OH group of donors; Glycerol-3-phosphate dehydrogenase (NAD(+)); Oxidoreductases; Acting on the CH-OH group of donors; Glycerol-3-phosphate dehydrogenase (NAD(P)(+))	P:GO:0005975; P:GO:0006072; P:GO:0046168; F:GO:0004367; F:GO:0016491; F:GO:0016616; F:GO:0051287; C:GO:0009331	P:carbohydrate metabolic process; P:glycerol-3-phosphate metabolic process; P:glycerol-3-phosphate catabolic process; F:glycerol-3-phosphate dehydrogenase [NAD+] activity; F:oxidoreductase activity; F:oxidoreductase activity, acting on the CH-OH group of donors, NAD or NADP as acceptor; F:NAD binding; C:glycerol-3-phosphate dehydrogenase complex
000001F|arrow.g336.t1	conidiation-specific protein 10	103	1.60057e-52	88.55					no GO terms	no GO terms
000001F|arrow.g337.t1	phosphopantetheinyl transferase PptB	149	1.36513e-80	83.82	P:GO:0006629; P:GO:0009058; P:GO:0044281; F:GO:0043167; C:GO:0005575	P:lipid metabolic process; P:biosynthetic process; P:small molecule metabolic process; F:ion binding; C:cellular_component	EC:2.7; EC:2; EC:2.7.8; EC:2.7.8.7	Transferring phosphorus-containing groups; Transferases; Transferring phosphorus-containing groups; Holo-[acyl-carrier-protein] synthase	P:GO:0006633; F:GO:0000287; F:GO:0008897	P:fatty acid biosynthetic process; F:magnesium ion binding; F:holo-[acyl-carrier-protein] synthase activity
000001F|arrow.g338.t1	Polymerase/histidinol phosphatase-like protein	314	0	86.59	P:GO:0006520; P:GO:0009058; F:GO:0016791	P:cellular amino acid metabolic process; P:biosynthetic process; F:phosphatase activity	EC:3.1; EC:3.1.3.15; EC:3; EC:3.1.3	Acting on ester bonds; Histidinol-phosphatase; Hydrolases; Acting on ester bonds	P:GO:0000105; F:GO:0003824; F:GO:0004401	P:histidine biosynthetic process; F:catalytic activity; F:histidinol-phosphatase activity
000001F|arrow.g339.t1	FK506-binding protein 1A	108	1.45591e-59	87.41	P:GO:0006464; F:GO:0016853	P:cellular protein modification process; F:isomerase activity	EC:5.2.1.8; EC:5.2; EC:5	Peptidylprolyl isomerase; Cis-trans-isomerases; Isomerases	F:GO:0003755	F:peptidyl-prolyl cis-trans isomerase activity
000001F|arrow.g340.t1	lipase 1	576	0	85.79	F:GO:0003674	F:molecular_function	EC:3	Hydrolases	no GO terms	no GO terms
000001F|arrow.g341.t1	LysM domain protein	640	0	79.92					no GO terms	no GO terms
000001F|arrow.g342.t1	P-loop containing nucleoside triphosphate hydrolase protein	422	0	95.74	F:GO:0016887; F:GO:0043167; C:GO:0005575	F:ATPase activity; F:ion binding; C:cellular_component	EC:3.6.1; EC:3.6; EC:3; EC:3.6.1.15	Acting on acid anhydrides; Acting on acid anhydrides; Hydrolases; Nucleoside-triphosphate phosphatase	F:GO:0005524; F:GO:0016887	F:ATP binding; F:ATPase activity
000001F|arrow.g343.t1	chromosome segregation protein	527	0	78.95	P:GO:0008150; F:GO:0003674; C:GO:0005694; C:GO:0032991	P:biological_process; F:molecular_function; C:chromosome; C:protein-containing complex	EC:2	Transferases	F:GO:0005515; C:GO:0033551	F:protein binding; C:monopolin complex
000001F|arrow.g344.t1	GPI ethanolamine phosphate transferase 1	987	0	89.1	P:GO:0006464; P:GO:0006629; P:GO:0009058; P:GO:0071554; F:GO:0003674; C:GO:0005783	P:cellular protein modification process; P:lipid metabolic process; P:biosynthetic process; P:cell wall organization or biogenesis; F:molecular_function; C:endoplasmic reticulum	EC:3.1.6; EC:3.1; EC:2.7; EC:2; EC:3; EC:2.7.8	Acting on ester bonds; Acting on ester bonds; Transferring phosphorus-containing groups; Transferases; Hydrolases; Transferring phosphorus-containing groups	P:GO:0006506; F:GO:0003824; F:GO:0016740; F:GO:0051377; C:GO:0005789; C:GO:0016021	P:GPI anchor biosynthetic process; F:catalytic activity; F:transferase activity; F:mannose-ethanolamine phosphotransferase activity; C:endoplasmic reticulum membrane; C:integral component of membrane
000001F|arrow.g345.t1	fungal-specific transcription factor domain-containing protein	857	0	93.54	P:GO:0009058; P:GO:0034641; F:GO:0003677; F:GO:0003700; F:GO:0043167	P:biosynthetic process; P:cellular nitrogen compound metabolic process; F:DNA binding; F:DNA-binding transcription factor activity; F:ion binding			P:GO:0006351; F:GO:0003677; F:GO:0008270	P:transcription, DNA-templated; F:DNA binding; F:zinc ion binding
000001F|arrow.g346.t1	cystathionine beta-lyase	434	0	97.25	P:GO:0006520; P:GO:0006790; P:GO:0009058; F:GO:0016829; F:GO:0043167; C:GO:0005737	P:cellular amino acid metabolic process; P:sulfur compound metabolic process; P:biosynthetic process; F:lyase activity; F:ion binding; C:cytoplasm	EC:4.4.1.8; EC:2; EC:4.4; EC:4; EC:4.4.1.1	Cystathionine beta-lyase; Transferases; Carbon-sulfur lyases; Lyases; Cystathionine gamma-lyase	P:GO:0019346; P:GO:0071266; F:GO:0003824; F:GO:0004121; F:GO:0030170	P:transsulfuration; P:'de novo' L-methionine biosynthetic process; F:catalytic activity; F:cystathionine beta-lyase activity; F:pyridoxal phosphate binding
000001F|arrow.g347.t1	sequence orphan	321	0	87.9	P:GO:0006520; P:GO:0006790; P:GO:0009058; F:GO:0016829; F:GO:0043167; C:GO:0005575	P:cellular amino acid metabolic process; P:sulfur compound metabolic process; P:biosynthetic process; F:lyase activity; F:ion binding; C:cellular_component	EC:4.4.1.8; EC:4.4; EC:4	Cystathionine beta-lyase; Carbon-sulfur lyases; Lyases	no GO terms	no GO terms
000001F|arrow.g348.t1	predicted protein	112	2.94374e-58	61.59	F:GO:0003674	F:molecular_function			no IPS match	no IPS match
000001F|arrow.g349.t1	predicted protein	305	0	87.82	F:GO:0003674	F:molecular_function	EC:3	Hydrolases	F:GO:0003824	F:catalytic activity
000001F|arrow.g350.t1	major facilitator superfamily domain, general substrate transporter	490	0	92.6	F:GO:0022857; C:GO:0005575	F:transmembrane transporter activity; C:cellular_component	EC:7	Translocases	P:GO:0055085; F:GO:0022857	P:transmembrane transport; F:transmembrane transporter activity
000001F|arrow.g351.t1	transcription factor, fungi	674	0	85.35	P:GO:0009058; P:GO:0034641; F:GO:0003677; F:GO:0003700; F:GO:0043167	P:biosynthetic process; P:cellular nitrogen compound metabolic process; F:DNA binding; F:DNA-binding transcription factor activity; F:ion binding			P:GO:0006351; P:GO:0006355; F:GO:0000981; F:GO:0003677; F:GO:0008270	P:transcription, DNA-templated; P:regulation of transcription, DNA-templated; F:DNA-binding transcription factor activity, RNA polymerase II-specific; F:DNA binding; F:zinc ion binding
000001F|arrow.g352.t1	hypothetical protein AOCH_004091	336	1.7875e-145	64.29	C:GO:0005575	C:cellular_component			no GO terms	no GO terms
000001F|arrow.g353.t1	transcription factor, fungi	331	1.60338e-148	73.88	P:GO:0009058; P:GO:0034641; F:GO:0003677; F:GO:0003700; F:GO:0043167	P:biosynthetic process; P:cellular nitrogen compound metabolic process; F:DNA binding; F:DNA-binding transcription factor activity; F:ion binding			no GO terms	no GO terms
000001F|arrow.g354.t1	MFS lactose permease, putative	555	0	90.07	F:GO:0022857; C:GO:0005886	F:transmembrane transporter activity; C:plasma membrane	EC:7	Translocases	P:GO:0055085; F:GO:0022857; C:GO:0016020; C:GO:0016021	P:transmembrane transport; F:transmembrane transporter activity; C:membrane; C:integral component of membrane
000001F|arrow.g355.t1	aldo-keto reductase yakc	339	0	92.3	P:GO:0008150; F:GO:0008168; F:GO:0016491	P:biological_process; F:methyltransferase activity; F:oxidoreductase activity	EC:2.1; EC:1.1; EC:1; EC:2; EC:1.1.1; EC:1.1.1.122; EC:2.1.1	Transferring one-carbon groups; Acting on the CH-OH group of donors; Oxidoreductases; Transferases; Acting on the CH-OH group of donors; D-threo-aldose 1-dehydrogenase; Transferring one-carbon groups	F:GO:0016491; F:GO:0047834	F:oxidoreductase activity; F:D-threo-aldose 1-dehydrogenase activity
000001F|arrow.g356.t1	S-adenosyl-L-methionine-dependent methyltransferase	266	8.83704e-127	67.84	P:GO:0008150; F:GO:0008168; F:GO:0016491	P:biological_process; F:methyltransferase activity; F:oxidoreductase activity	EC:2.1; EC:1; EC:2; EC:2.1.1	Transferring one-carbon groups; Oxidoreductases; Transferases; Transferring one-carbon groups	F:GO:0008168; F:GO:0008171	F:methyltransferase activity; F:O-methyltransferase activity
000001F|arrow.g357.t1	predicted protein	187	2.80704e-98	62.08					no GO terms	no GO terms
000001F|arrow.g358.t1	probable RNA-directed DNA polymerase from transposon X-element	236	1.15208e-27	75.61	P:GO:0006259; P:GO:0009058; F:GO:0004518; F:GO:0016779	P:DNA metabolic process; P:biosynthetic process; F:nuclease activity; F:nucleotidyltransferase activity	EC:3.1.30; EC:3.1; EC:2.7; EC:2; EC:3; EC:2.7.7.49; EC:3.1.26; EC:2.7.7; EC:3.1.26.4	Acting on ester bonds; Acting on ester bonds; Transferring phosphorus-containing groups; Transferases; Hydrolases; RNA-directed DNA polymerase; Acting on ester bonds; Transferring phosphorus-containing groups; Ribonuclease H	no GO terms	no GO terms
000001F|arrow.g359.t1	predicted protein	442	0	61.72					no IPS match	no IPS match
000001F|arrow.g360.t1	putative transporter	494	0	78.35	F:GO:0022857; C:GO:0005575	F:transmembrane transporter activity; C:cellular_component	EC:7	Translocases	P:GO:0055085; F:GO:0022857	P:transmembrane transport; F:transmembrane transporter activity
000001F|arrow.g361.t1	hypothetical protein P175DRAFT_0534595	208	4.17749e-59	59.18					no GO terms	no GO terms
000001F|arrow.g362.t1	predicted protein	512	0	55.52	F:GO:0003674	F:molecular_function			F:GO:0005515	F:protein binding
000001F|arrow.g363.t1	aromatic compound dioxygenase	374	6.57502e-175	81.46	P:GO:0008150; F:GO:0016491; F:GO:0043167	P:biological_process; F:oxidoreductase activity; F:ion binding	EC:1.13.11; EC:1.13; EC:1	Acting on single donors with incorporation of molecular oxygen (oxygenases). The oxygen incorporated need not be derived from O(2); Acting on single donors with incorporation of molecular oxygen (oxygenases). The oxygen incorporated need not be derived from O(2); Oxidoreductases	P:GO:0006725; F:GO:0003824; F:GO:0005506; F:GO:0008199; F:GO:0016702	P:cellular aromatic compound metabolic process; F:catalytic activity; F:iron ion binding; F:ferric iron binding; F:oxidoreductase activity, acting on single donors with incorporation of molecular oxygen, incorporation of two atoms of oxygen
000001F|arrow.g364.t1	monooxygenase, putative	390	0	86.54	P:GO:0009058; P:GO:0044281; F:GO:0016491; F:GO:0043167	P:biosynthetic process; P:small molecule metabolic process; F:oxidoreductase activity; F:ion binding	EC:1	Oxidoreductases	F:GO:0071949	F:FAD binding
000001F|arrow.g365.t1	cytochrome P450, putative	669	0	78.51	F:GO:0016491; F:GO:0043167; C:GO:0005575	F:oxidoreductase activity; F:ion binding; C:cellular_component	EC:1; EC:1.14	Oxidoreductases; Acting on paired donors, with incorporation or reduction of molecular oxygen. The oxygen incorporated need not be derived from O(2)	F:GO:0005506; F:GO:0016705; F:GO:0020037	F:iron ion binding; F:oxidoreductase activity, acting on paired donors, with incorporation or reduction of molecular oxygen; F:heme binding
000001F|arrow.g366.t1	3-oxoacyl-(acyl-carrier-protein) reductase	1092	8.33674e-144	61.22	P:GO:0009058; P:GO:0034641; F:GO:0003677; F:GO:0016491; F:GO:0043167	P:biosynthetic process; P:cellular nitrogen compound metabolic process; F:DNA binding; F:oxidoreductase activity; F:ion binding	EC:1.1; EC:1; EC:1.1.1	Acting on the CH-OH group of donors; Oxidoreductases; Acting on the CH-OH group of donors	P:GO:0006351; F:GO:0003677; F:GO:0008270; F:GO:0016491	P:transcription, DNA-templated; F:DNA binding; F:zinc ion binding; F:oxidoreductase activity
000001F|arrow.g367.t1	Pisatin demethylase	500	0	76.78	P:GO:0008150; F:GO:0008168; F:GO:0016491; F:GO:0043167; C:GO:0005575	P:biological_process; F:methyltransferase activity; F:oxidoreductase activity; F:ion binding; C:cellular_component	EC:2.1; EC:1; EC:1.14; EC:2; EC:2.1.1	Transferring one-carbon groups; Oxidoreductases; Acting on paired donors, with incorporation or reduction of molecular oxygen. The oxygen incorporated need not be derived from O(2); Transferases; Transferring one-carbon groups	F:GO:0004497; F:GO:0005506; F:GO:0016705; F:GO:0020037	F:monooxygenase activity; F:iron ion binding; F:oxidoreductase activity, acting on paired donors, with incorporation or reduction of molecular oxygen; F:heme binding
000001F|arrow.g368.t1	MFS general substrate transporter	481	0	74.33	F:GO:0022857; C:GO:0005575	F:transmembrane transporter activity; C:cellular_component	EC:7	Translocases	P:GO:0055085; F:GO:0022857	P:transmembrane transport; F:transmembrane transporter activity
000001F|arrow.g369.t1	aryl-alcohol oxidase; vanillyl-alcohol oxidase	604	0	90.92	F:GO:0016491; F:GO:0043167	F:oxidoreductase activity; F:ion binding	EC:1	Oxidoreductases	F:GO:0003824; F:GO:0016491; F:GO:0050660; F:GO:0071949	F:catalytic activity; F:oxidoreductase activity; F:flavin adenine dinucleotide binding; F:FAD binding
000001F|arrow.g370.t1	15-hydroxyprostaglandin dehydrogenase (NAD(+))	276	0	88.47	F:GO:0016491; F:GO:0016746	F:oxidoreductase activity; F:transferase activity, transferring acyl groups	EC:2.3.1.85; EC:1.1; EC:2.3; EC:1; EC:2; EC:1.1.1; EC:1.1.1.100; EC:2.3.1	Fatty-acid synthase system; Acting on the CH-OH group of donors; Acyltransferases; Oxidoreductases; Transferases; Acting on the CH-OH group of donors; 3-oxoacyl-[acyl-carrier-protein] reductase; Acyltransferases	F:GO:0016491	F:oxidoreductase activity
000001F|arrow.g371.t1	4-carboxymuconolactone decarboxylase	142	1.95892e-80	87.01	P:GO:0008150; F:GO:0016491	P:biological_process; F:oxidoreductase activity	EC:1.11; EC:1; EC:1.11.1.15	Acting on a peroxide as acceptor; Oxidoreductases; Acting on a peroxide as acceptor	F:GO:0051920	F:peroxiredoxin activity
000001F|arrow.g372.t1	3-hydroxyisobutyrate dehydrogenase, putative	320	1.60478e-179	81.14	P:GO:0006520; P:GO:0009056; F:GO:0016491	P:cellular amino acid metabolic process; P:catabolic process; F:oxidoreductase activity	EC:1.1; EC:1.1.1.31; EC:1; EC:1.1.1	Acting on the CH-OH group of donors; 3-hydroxyisobutyrate dehydrogenase; Oxidoreductases; Acting on the CH-OH group of donors	F:GO:0016491; F:GO:0050661; F:GO:0051287	F:oxidoreductase activity; F:NADP binding; F:NAD binding
000001F|arrow.g373.t1	N-acyl homoserine lactonase AttM	301	0	87.1	P:GO:0008150; C:GO:0005575	P:biological_process; C:cellular_component			no GO terms	no GO terms
000001F|arrow.g374.t1	alpha/beta fold family hydrolase, putative	290	0	88.88	F:GO:0003674	F:molecular_function	EC:3	Hydrolases	no GO terms	no GO terms
000001F|arrow.g375.t1	CoA-transferase family III	227	4.78202e-49	63.77	F:GO:0008410	F:CoA-transferase activity			no GO terms	no GO terms
000001F|arrow.g376.t1	hypothetical protein EYZ11_004488	449	0	77.87	P:GO:0009116; F:GO:0003824	P:nucleoside metabolic process; F:catalytic activity			no GO terms	no GO terms
000001F|arrow.g377.t1	hypothetical protein BDV40DRAFT_312670	379	0	82.41	F:GO:0003674	F:molecular_function			F:GO:0005515	F:protein binding
000001F|arrow.g378.t1	hypothetical protein CDV56_104575	330	0	88.52					no GO terms	no GO terms
000001F|arrow.g379.t1	MFS monosaccharide transporter	494	0	80.55	F:GO:0016491; F:GO:0022857; C:GO:0005886	F:oxidoreductase activity; F:transmembrane transporter activity; C:plasma membrane	EC:1; EC:7	Oxidoreductases; Translocases	P:GO:0055085; F:GO:0022857; C:GO:0016021	P:transmembrane transport; F:transmembrane transporter activity; C:integral component of membrane
000001F|arrow.g380.t1	NAD-binding Rossmann fold oxidoreductase	349	0	74.98	F:GO:0016491	F:oxidoreductase activity	EC:1	Oxidoreductases	F:GO:0000166	F:nucleotide binding
000001F|arrow.g381.t1	inosine-uridine preferring nucleoside hydrolase-domain-containing protein	342	3.53143e-158	73.21	C:GO:0005575	C:cellular_component			no GO terms	no GO terms
000001F|arrow.g382.t1	Hypothetical protein PENO1_055520	195	3.05365e-64	63.72	C:GO:0016020; C:GO:0016021	C:membrane; C:integral component of membrane			no IPS match	no IPS match
000001F|arrow.g383.t1	hypothetical protein PENNAL_c0012G08691	291	1.9908e-78	57.04	P:GO:0006468; F:GO:0004672; F:GO:0005524	P:protein phosphorylation; F:protein kinase activity; F:ATP binding			no IPS match	no IPS match
000001F|arrow.g384.t1	predicted protein	263	9.16384e-174	77.94					no IPS match	no IPS match
000001F|arrow.g385.t1	uncharacterized protein ATNIH1004_006611	216	3.31678e-69	65.23	F:GO:0016787	F:hydrolase activity			no IPS match	no IPS match
000001F|arrow.g386.t1	predicted protein	187	3.79205e-74	81.62	P:GO:0009058; P:GO:0034641; F:GO:0003700	P:biosynthetic process; P:cellular nitrogen compound metabolic process; F:DNA-binding transcription factor activity			no GO terms	no GO terms
000001F|arrow.g387.t1	PHD finger protein 8	447	1.297e-150	62.2	P:GO:0032259; F:GO:0008168	P:methylation; F:methyltransferase activity			no GO terms	no GO terms
000001F|arrow.g388.t1	uncharacterized protein BDW43DRAFT_313462	460	0	56.09					no GO terms	no GO terms
000001F|arrow.g389.t1	hypothetical protein PHISCL_09094	133	5.33864e-67	69.75	C:GO:0005575	C:cellular_component			no IPS match	no IPS match
000001F|arrow.g390.t1	predicted protein	244	1.78895e-30	53.37	P:GO:0008150; F:GO:0003674; C:GO:0005575	P:biological_process; F:molecular_function; C:cellular_component			no GO terms	no GO terms
000001F|arrow.g391.t1	---NA---	208							no GO terms	no GO terms
000001F|arrow.g392.t1	patatin-like phospholipase	1001	0	66.55	P:GO:0006629	P:lipid metabolic process			P:GO:0006629	P:lipid metabolic process
000001F|arrow.g393.t1	ferric reductase transmembrane component 3	155	2.41119e-27	65.09	P:GO:0055114; F:GO:0016491; C:GO:0016020; C:GO:0016021	P:obsolete oxidation-reduction process; F:oxidoreductase activity; C:membrane; C:integral component of membrane			no IPS match	no IPS match
000001F|arrow.g394.t1	hypothetical protein IFM53868_08432	191	1.61302e-47	60.4					no GO terms	no GO terms
000001F|arrow.g395.t1	uncharacterized protein ATNIH1004_011306	574	0	59.47	P:GO:0008150; F:GO:0003674; C:GO:0005575	P:biological_process; F:molecular_function; C:cellular_component			no GO terms	no GO terms
000001F|arrow.g396.t1	hypothetical protein AFUB_044240	363	3.75478e-105	62.69					no IPS match	no IPS match
000001F|arrow.g397.t1	uncharacterized protein BDV37DRAFT_229400	373	1.64346e-98	66.1					no GO terms	no GO terms
000001F|arrow.g398.t1	hypothetical protein BDV29DRAFT_185574	247	5.36635e-46	57.6					no IPS match	no IPS match
000001F|arrow.g399.t1	predicted protein	1165	0	69.83					no GO terms	no GO terms
000001F|arrow.g400.t1	predicted protein	300	2.64393e-63	58.53	P:GO:0006464; F:GO:0016301	P:cellular protein modification process; F:kinase activity	EC:2.7.1; EC:2.7; EC:2	Transferring phosphorus-containing groups; Transferring phosphorus-containing groups; Transferases	P:GO:0006468; F:GO:0004672	P:protein phosphorylation; F:protein kinase activity
000001F|arrow.g401.t1	Ferric/cupric reductase transmembrane component 2	267	1.23652e-82	66.01	F:GO:0016491	F:oxidoreductase activity	EC:1	Oxidoreductases	F:GO:0016491	F:oxidoreductase activity
000001F|arrow.g402.t1	uncharacterized protein ATNIH1004_011296	274	9.83446e-136	70.71	P:GO:0006464; F:GO:0016301; F:GO:0043167	P:cellular protein modification process; F:kinase activity; F:ion binding	EC:2.7.1; EC:2.7; EC:2	Transferring phosphorus-containing groups; Transferring phosphorus-containing groups; Transferases	P:GO:0006468; F:GO:0004672; F:GO:0005524	P:protein phosphorylation; F:protein kinase activity; F:ATP binding
000001F|arrow.g403.t1	kinase-like domain-containing protein	246	8.32398e-114	74.11	P:GO:0006464; F:GO:0016301; F:GO:0043167	P:cellular protein modification process; F:kinase activity; F:ion binding	EC:2.7.1; EC:2.7; EC:2	Transferring phosphorus-containing groups; Transferring phosphorus-containing groups; Transferases	P:GO:0006468; F:GO:0004672; F:GO:0005524	P:protein phosphorylation; F:protein kinase activity; F:ATP binding
000001F|arrow.g404.t1	hypothetical protein PDE_00696	151	5.02625e-89	64.57					no IPS match	no IPS match
000001F|arrow.g405.t1	Heterokaryon incompatibility protein (HET) family protein	463	0	68.93					no GO terms	no GO terms
000001F|arrow.g406.t1	hypothetical protein CNMCM8980_006747	285	1.89868e-79	67.15					no IPS match	no IPS match
000001F|arrow.g407.t1	hypothetical protein AKAW_11467, partial	255	1.26637e-90	76.9					no GO terms	no GO terms
000001F|arrow.g408.t1	P-loop containing nucleoside triphosphate hydrolase protein	789	0	68.96	F:GO:0016887; F:GO:0043167	F:ATPase activity; F:ion binding	EC:3.6.1; EC:3.6; EC:3; EC:3.6.1.15	Acting on acid anhydrides; Acting on acid anhydrides; Hydrolases; Nucleoside-triphosphate phosphatase	F:GO:0005524; F:GO:0016887	F:ATP binding; F:ATPase activity
000001F|arrow.g409.t1	predicted protein	334	1.42946e-141	65.93					no GO terms	no GO terms
000001F|arrow.g410.t1	amino acid permease-domain-containing protein	834	0	78.87	P:GO:0055085; F:GO:0003677; C:GO:0005575	P:transmembrane transport; F:DNA binding; C:cellular_component			F:GO:0003677	F:DNA binding
000001F|arrow.g411.t1	postreplication repair E3 ubiquitin-protein ligase rad18	396	0	82.24	P:GO:0006259; P:GO:0006464; P:GO:0006950; F:GO:0003677; F:GO:0043167	P:DNA metabolic process; P:cellular protein modification process; P:response to stress; F:DNA binding; F:ion binding	EC:2	Transferases	P:GO:0006281; P:GO:0006301; P:GO:0006513; F:GO:0003677; F:GO:0003697; F:GO:0061630	P:DNA repair; P:postreplication repair; P:protein monoubiquitination; F:DNA binding; F:single-stranded DNA binding; F:ubiquitin protein ligase activity
000001F|arrow.g412.t1	Snf7-domain-containing protein	501	0	83.12	P:GO:0007034	P:vacuolar transport			P:GO:0007034	P:vacuolar transport
000001F|arrow.g413.t1	ER-golgi trafficking TRAPP I complex 85 kDa subunit-domain-containing protein	743	0	90.93					no GO terms	no GO terms
000001F|arrow.g414.t1	poly(A) polymerase	522	0	87.21	P:GO:0034641; F:GO:0003723; F:GO:0016779; C:GO:0005739	P:cellular nitrogen compound metabolic process; F:RNA binding; F:nucleotidyltransferase activity; C:mitochondrion	EC:2.7; EC:2; EC:2.7.7	Transferring phosphorus-containing groups; Transferases; Transferring phosphorus-containing groups	P:GO:0006396; F:GO:0003723; F:GO:0016779	P:RNA processing; F:RNA binding; F:nucleotidyltransferase activity
000001F|arrow.g415.t1	ATP :tRNA-specific tRNA nucleotidyltransferase	589	0	79.2	F:GO:0003674; C:GO:0005654; C:GO:0005694; C:GO:0005829; C:GO:0032991	F:molecular_function; C:nucleoplasm; C:chromosome; C:cytosol; C:protein-containing complex	EC:2	Transferases	no GO terms	no GO terms
000001F|arrow.g416.t1	SacI homology domain-containing protein	1009	0	87.63	P:GO:0006629; P:GO:0009058; F:GO:0016791; C:GO:0005575	P:lipid metabolic process; P:biosynthetic process; F:phosphatase activity; C:cellular_component	EC:3.1; EC:3; EC:3.1.3	Acting on ester bonds; Hydrolases; Acting on ester bonds	P:GO:0046856; F:GO:0016791; F:GO:0043813	P:phosphatidylinositol dephosphorylation; F:phosphatase activity; F:phosphatidylinositol-3,5-bisphosphate 5-phosphatase activity
000001F|arrow.g417.t1	hypothetical protein BDV26DRAFT_294644	137	1.3415e-11	65.9					no GO terms	no GO terms
000001F|arrow.g418.t1	Acyl-CoA dehydrogenase	1165	0	92.05	P:GO:0006464; F:GO:0016301; F:GO:0016491; F:GO:0043167	P:cellular protein modification process; F:kinase activity; F:oxidoreductase activity; F:ion binding	EC:2.7.1; EC:1.3; EC:1; EC:2.7; EC:2	Transferring phosphorus-containing groups; Acting on the CH-CH group of donors; Oxidoreductases; Transferring phosphorus-containing groups; Transferases	P:GO:0006468; F:GO:0004672; F:GO:0005524; F:GO:0016627; F:GO:0050660	P:protein phosphorylation; F:protein kinase activity; F:ATP binding; F:oxidoreductase activity, acting on the CH-CH group of donors; F:flavin adenine dinucleotide binding
000001F|arrow.g419.t1	FAD dependent oxidoreductase	392	0	84.66	P:GO:0006259; P:GO:0009058; F:GO:0003677; F:GO:0016491; F:GO:0016779; F:GO:0043167	P:DNA metabolic process; P:biosynthetic process; F:DNA binding; F:oxidoreductase activity; F:nucleotidyltransferase activity; F:ion binding	EC:1; EC:2.7; EC:2; EC:2.7.7.7; EC:2.7.7	Oxidoreductases; Transferring phosphorus-containing groups; Transferases; DNA-directed DNA polymerase; Transferring phosphorus-containing groups	F:GO:0016491	F:oxidoreductase activity
000001F|arrow.g420.t1	DNA polymerase delta large chain	1104	0	95.5	P:GO:0000278; P:GO:0006259; P:GO:0006950; P:GO:0009058; F:GO:0003677; F:GO:0016779; F:GO:0043167; C:GO:0000228; C:GO:0032991	P:mitotic cell cycle; P:DNA metabolic process; P:response to stress; P:biosynthetic process; F:DNA binding; F:nucleotidyltransferase activity; F:ion binding; C:nuclear chromosome; C:protein-containing complex	EC:2.7; EC:2; EC:2.7.7.7; EC:2.7.7	Transferring phosphorus-containing groups; Transferases; DNA-directed DNA polymerase; Transferring phosphorus-containing groups	F:GO:0000166; F:GO:0003676; F:GO:0003677; F:GO:0003887	F:nucleotide binding; F:nucleic acid binding; F:DNA binding; F:DNA-directed DNA polymerase activity
000001F|arrow.g421.t1	predicted protein	169	9.57144e-68	70.64					no GO terms	no GO terms
000001F|arrow.g422.t1	predicted protein	197	3.28708e-34	63.76					no GO terms	no GO terms
000001F|arrow.g423.t1	hypothetical protein ATETN484_0004036700	183	5.163e-120	90.63	C:GO:0005575	C:cellular_component			no GO terms	no GO terms
000001F|arrow.g424.t1	conserved hypothetical protein	85	1.66729e-41	88.17					no GO terms	no GO terms
000001F|arrow.g425.t1	putative C2H2 finger domain protein	399	0	73.08	C:GO:0005634	C:nucleus			no GO terms	no GO terms
000001F|arrow.g426.t1	cyanate hydratase	160	1.54886e-115	96.06	P:GO:0034641; P:GO:0044281; F:GO:0003677; F:GO:0016829	P:cellular nitrogen compound metabolic process; P:small molecule metabolic process; F:DNA binding; F:lyase activity	EC:4.3; EC:4; EC:4.2.1.104	Carbon-nitrogen lyases; Lyases; Cyanase	P:GO:0009439; F:GO:0003677; F:GO:0008824	P:cyanate metabolic process; F:DNA binding; F:cyanate hydratase activity
000001F|arrow.g427.t1	HET-domain-containing protein	664	1.03303e-99	44.76					no GO terms	no GO terms
000001F|arrow.g428.t1	caffeine resistance protein	452	0	84.33	F:GO:0022857; C:GO:0005886	F:transmembrane transporter activity; C:plasma membrane	EC:7	Translocases	P:GO:0055085; F:GO:0022857	P:transmembrane transport; F:transmembrane transporter activity
000001F|arrow.g429.t1	NAD-dependent epimerase/dehydratase	387	0	92.78	F:GO:0003674	F:molecular_function			no GO terms	no GO terms
000001F|arrow.g430.t1	thermolabile L-asparaginase, putative	353	0	87.42	P:GO:0008150; F:GO:0003674; C:GO:0005575	P:biological_process; F:molecular_function; C:cellular_component			no GO terms	no GO terms
000001F|arrow.g431.t1	Probable transposable element	231	1.12303e-33	79.05					no GO terms	no GO terms
000001F|arrow.g432.t1	uncharacterized oxidoreductase C736.13	347	0	87.35	F:GO:0016491; C:GO:0005576	F:oxidoreductase activity; C:extracellular region	EC:1	Oxidoreductases	F:GO:0016491	F:oxidoreductase activity
000001F|arrow.g433.t1	ricin B lectin	355	0	92.22	F:GO:0003674; C:GO:0005576	F:molecular_function; C:extracellular region			no GO terms	no GO terms
000001F|arrow.g434.t1	phenol monooxygenase	655	0	89.34	P:GO:0009058; P:GO:0034641; F:GO:0003677; F:GO:0016491; F:GO:0043167	P:biosynthetic process; P:cellular nitrogen compound metabolic process; F:DNA binding; F:oxidoreductase activity; F:ion binding	EC:1	Oxidoreductases	F:GO:0071949	F:FAD binding
000001F|arrow.g435.t1	predicted protein	351	0	81.58	P:GO:0009058; P:GO:0034641; F:GO:0003677; F:GO:0043167	P:biosynthetic process; P:cellular nitrogen compound metabolic process; F:DNA binding; F:ion binding			no IPS match	no IPS match
000001F|arrow.g436.t1	fungal-specific transcription factor domain-containing protein	533	0	67.48	P:GO:0009058; P:GO:0034641; F:GO:0003677; F:GO:0043167	P:biosynthetic process; P:cellular nitrogen compound metabolic process; F:DNA binding; F:ion binding			P:GO:0006351; F:GO:0003677; F:GO:0008270	P:transcription, DNA-templated; F:DNA binding; F:zinc ion binding
000001F|arrow.g437.t1	NAD dependent epimerase/dehydratase	313	1.17573e-158	65.43	F:GO:0003674	F:molecular_function			F:GO:0003824	F:catalytic activity
000001F|arrow.g438.t1	macro domain-like protein	238	1.40566e-158	85.75					no GO terms	no GO terms
000001F|arrow.g439.t1	peptidase C12, ubiquitin carboxyl-terminal hydrolase 1	266	6.75425e-161	74.2	P:GO:0009056; F:GO:0008233	P:catabolic process; F:peptidase activity	EC:3.4; EC:3.4.19.9; EC:3; EC:3.4.19; EC:3.4.19.2; EC:3.4.19.12	Acting on peptide bonds (peptidases); Folate gamma-glutamyl hydrolase; Hydrolases; Acting on peptide bonds (peptidases); Peptidyl-glycinamidase; Ubiquitinyl hydrolase 1	P:GO:0006511; F:GO:0004843	P:ubiquitin-dependent protein catabolic process; F:thiol-dependent ubiquitin-specific protease activity
000001F|arrow.g440.t1	phospholipase D Active site motif protein	1092	0	83.77	P:GO:0006629; P:GO:0007165; P:GO:0009056; P:GO:0009058; F:GO:0003674	P:lipid metabolic process; P:signal transduction; P:catabolic process; P:biosynthetic process; F:molecular_function	EC:3.1.4; EC:3.1; EC:3; EC:3.1.4.4; EC:3.1.1	Acting on ester bonds; Acting on ester bonds; Hydrolases; Phospholipase D; Acting on ester bonds	P:GO:0006654; P:GO:0048017; F:GO:0003824; F:GO:0004630	P:phosphatidic acid biosynthetic process; P:inositol lipid-mediated signaling; F:catalytic activity; F:phospholipase D activity
000001F|arrow.g441.t1	YAP-binding/ALF4/Glomulin	674	0	86.36	P:GO:0006950	P:response to stress			P:GO:0034599	P:cellular response to oxidative stress
000001F|arrow.g442.t1	hypothetical protein M752DRAFT_106170	149	5.494e-91	95.38	C:GO:0005783	C:endoplasmic reticulum			no GO terms	no GO terms
000001F|arrow.g443.t1	rhomboid family membrane protein	518	0	85.95	F:GO:0008233; C:GO:0005575	F:peptidase activity; C:cellular_component	EC:3.4.21.73; EC:3.4.24.7; EC:3.4.21.71; EC:3.4.24.3; EC:3.4.21.34; EC:3.4.21.78; EC:3.4.21.75; EC:3.4.21.26; EC:3.4.21.27; EC:3.4.21.68; EC:3.4.21.69; EC:3.4.24.34; EC:3.4.21.41; EC:3.4.21.83; EC:3.4.21.88; EC:3.4.21.45; EC:3.4.21.89; EC:3.4.21.42; EC:3.4.19.1; EC:3.4.21.43; EC:3.4.21.87; EC:3.4.21.38; EC:3.4.21.35; EC:3.4.21.79; EC:3.4.21.36; EC:3.4.21.102; EC:3.4.21.39; EC:3.4.21; EC:3.4.21.4;…	U-plasminogen activator; Interstitial collagenase; Pancreatic elastase II; Microbial collagenase; Plasma kallikrein; Granzyme A; Furin; Prolyl oligopeptidase; Coagulation factor XIa; T-plasminogen activator; Protein C (activated); Neutrophil collagenase; Complement subcomponent C1r; Oligopeptidase B; Repressor LexA; Complement factor I; Signal peptidase I; Complement subcomponent C1s; Acylaminoac…	P:GO:0006508; F:GO:0004252; C:GO:0016021	P:proteolysis; F:serine-type endopeptidase activity; C:integral component of membrane
000001F|arrow.g444.t1	DHHC zinc finger membrane protein	533	0	82.83	P:GO:0006464; P:GO:0006605; P:GO:0009058; F:GO:0016746; C:GO:0005773	P:cellular protein modification process; P:protein targeting; P:biosynthetic process; F:transferase activity, transferring acyl groups; C:vacuole	EC:2.3; EC:2; EC:2.3.1.225; EC:2.3.1	Acyltransferases; Transferases; Protein S-acyltransferase; Acyltransferases	F:GO:0016409	F:palmitoyltransferase activity
000001F|arrow.g445.t1	ubiquitin-conjugating enzyme/RWD-like protein	287	3.4951e-156	72.78	F:GO:0016746; C:GO:0005575	F:transferase activity, transferring acyl groups; C:cellular_component	EC:2.3; EC:2; EC:2.3.1.225; EC:2.3.1	Acyltransferases; Transferases; Protein S-acyltransferase; Acyltransferases	no GO terms	no GO terms
000001F|arrow.g446.t1	predicted protein	214	7.62549e-149	91.64					no IPS match	no IPS match
000001F|arrow.g447.t1	TFIIIC transcription initiation factor complex subunits Tfc3	1810	0	70.23	P:GO:0009058; P:GO:0034641; F:GO:0003677; C:GO:0032991	P:biosynthetic process; P:cellular nitrogen compound metabolic process; F:DNA binding; C:protein-containing complex			P:GO:0006384; F:GO:0003677; C:GO:0000127	P:transcription initiation from RNA polymerase III promoter; F:DNA binding; C:transcription factor TFIIIC complex
000001F|arrow.g448.t1	hypothetical protein ATETN484_0004038800	337	0	88.97	C:GO:0005575	C:cellular_component			no GO terms	no GO terms
000001F|arrow.g449.t1	ribosomal N-lysine methyltransferase	395	0	69.06	F:GO:0003674	F:molecular_function			F:GO:0005515	F:protein binding
000001F|arrow.g450.t1	mitochondrial protein from FMP27-domain-containing protein	2893	0	91.58					no GO terms	no GO terms
000001F|arrow.g451.t1	NADH-cytochrome B5 reductase	205	5.33454e-139	92.63					no GO terms	no GO terms
000001F|arrow.g452.t1	translation initiation factor 4B	516	0	84.22	F:GO:0003723; F:GO:0022857; C:GO:0005575	F:RNA binding; F:transmembrane transporter activity; C:cellular_component	EC:7	Translocases	F:GO:0003676	F:nucleic acid binding
000001F|arrow.g453.t1	major facilitator superfamily domain-containing protein	480	0	79.58	F:GO:0022857; C:GO:0005575	F:transmembrane transporter activity; C:cellular_component	EC:7	Translocases	P:GO:0055085; F:GO:0022857	P:transmembrane transport; F:transmembrane transporter activity
000001F|arrow.g454.t1	predicted protein	423	2.19786e-85	51.95	P:GO:0006869; F:GO:0008289	P:lipid transport; F:lipid binding			no GO terms	no GO terms
000001F|arrow.g455.t1	---NA---	79							no IPS match	no IPS match
000001F|arrow.g456.t1	predicted protein	597	0	75.39	P:GO:0006464; P:GO:0009058; F:GO:0016757; C:GO:0005575	P:cellular protein modification process; P:biosynthetic process; F:transferase activity, transferring glycosyl groups; C:cellular_component	EC:2.4; EC:2	Glycosyltransferases; Transferases	P:GO:0006486; F:GO:0016757	P:protein glycosylation; F:transferase activity, transferring glycosyl groups
000001F|arrow.g457.t1	putative MoxY	582	0	84.06	F:GO:0016491; F:GO:0043167	F:oxidoreductase activity; F:ion binding	EC:1.14.13.8; EC:1; EC:1.14; EC:1.14.13	Flavin-containing monooxygenase; Oxidoreductases; Acting on paired donors, with incorporation or reduction of molecular oxygen. The oxygen incorporated need not be derived from O(2); Acting on paired donors, with incorporation or reduction of molecular oxygen. The oxygen incorporated need not be derived from O(2)	F:GO:0004499; F:GO:0050660; F:GO:0050661	F:N,N-dimethylaniline monooxygenase activity; F:flavin adenine dinucleotide binding; F:NADP binding
000001F|arrow.g458.t1	alpha/beta-hydrolase	333	1.80476e-153	69.75	P:GO:0008150; F:GO:0003674; C:GO:0005575	P:biological_process; F:molecular_function; C:cellular_component	EC:3	Hydrolases	F:GO:0016787	F:hydrolase activity
000001F|arrow.g459.t1	hypothetical protein BO66DRAFT_471398	700	0	55.19	P:GO:0009058; P:GO:0034641; F:GO:0003677; F:GO:0003700; F:GO:0043167	P:biosynthetic process; P:cellular nitrogen compound metabolic process; F:DNA binding; F:DNA-binding transcription factor activity; F:ion binding			P:GO:0006351; P:GO:0006355; F:GO:0000981; F:GO:0003677; F:GO:0008270	P:transcription, DNA-templated; P:regulation of transcription, DNA-templated; F:DNA-binding transcription factor activity, RNA polymerase II-specific; F:DNA binding; F:zinc ion binding
000001F|arrow.g460.t1	4-formylbenzenesulfonate dehydrogenase TsaC1/TsaC2	281	1.19799e-97	72.36	F:GO:0016491	F:oxidoreductase activity	EC:1	Oxidoreductases	F:GO:0016491	F:oxidoreductase activity
000001F|arrow.g461.t1	putative transporter	491	0	72.59	F:GO:0022857; C:GO:0005575	F:transmembrane transporter activity; C:cellular_component	EC:7	Translocases	P:GO:0055085; F:GO:0022857	P:transmembrane transport; F:transmembrane transporter activity
000001F|arrow.g462.t1	GPI anchored serine-threonine rich protein	205	3.77226e-46	60.76					no GO terms	no GO terms
000001F|arrow.g463.t1	predicted protein	255	1.36033e-109	77.51	F:GO:0030234	F:enzyme regulator activity			F:GO:0005085	F:guanyl-nucleotide exchange factor activity
000001F|arrow.g464.t1	oxidoreductase family	510	0	81	P:GO:0006412; F:GO:0003735; F:GO:0016491; C:GO:0005840	P:translation; F:structural constituent of ribosome; F:oxidoreductase activity; C:ribosome	EC:1	Oxidoreductases	P:GO:0006412; F:GO:0000166; F:GO:0003735; C:GO:0005840	P:translation; F:nucleotide binding; F:structural constituent of ribosome; C:ribosome
000001F|arrow.g465.t1	DRAP deaminase	764	0	85.7	P:GO:0034641; P:GO:0042254; F:GO:0003723; F:GO:0016829; F:GO:0016853; C:GO:0005777	P:cellular nitrogen compound metabolic process; P:ribosome biogenesis; F:RNA binding; F:lyase activity; F:isomerase activity; C:peroxisome	EC:4.2.1; EC:4.2.1.70; EC:4.2; EC:5.4; EC:4; EC:5	Carbon-oxygen lyases; Pseudouridylate synthase; Carbon-oxygen lyases; Intramolecular transferases; Lyases; Isomerases	P:GO:0001522; P:GO:0009451; P:GO:0016559; F:GO:0003723; F:GO:0009982; C:GO:0005779	P:pseudouridine synthesis; P:RNA modification; P:peroxisome fission; F:RNA binding; F:pseudouridine synthase activity; C:integral component of peroxisomal membrane
000001F|arrow.g466.t1	general amino acid permease (agp2)	555	0	90.38	P:GO:0055085; C:GO:0005575	P:transmembrane transport; C:cellular_component			P:GO:0055085; C:GO:0016020	P:transmembrane transport; C:membrane
000001F|arrow.g467.t1	predicted protein	572	0	84.48	F:GO:0008233; F:GO:0043167; C:GO:0005576	F:peptidase activity; F:ion binding; C:extracellular region	EC:3.4.17; EC:3.4.17.2; EC:3.4.17.1; EC:3.4.17.6; EC:3.4.17.4; EC:3.4.17.3; EC:3.4.17.11; EC:3.4.17.22; EC:3.4.17.10; EC:3.4.17.21; EC:3.4; EC:3; EC:3.4.17.17	Acting on peptide bonds (peptidases); Carboxypeptidase B; Carboxypeptidase A; Alanine carboxypeptidase; Gly-Xaa carboxypeptidase; Lysine carboxypeptidase; Glutamate carboxypeptidase; Metallocarboxypeptidase D; Carboxypeptidase E; Glutamate carboxypeptidase II; Acting on peptide bonds (peptidases); Hydrolases; Tubulinyl-Tyr carboxypeptidase	F:GO:0004181; F:GO:0016787	F:metallocarboxypeptidase activity; F:hydrolase activity
000001F|arrow.g468.t1	threonine aldolase	370	0	94.57	P:GO:0006520; P:GO:0009056; P:GO:0009058; F:GO:0016829; C:GO:0005829	P:cellular amino acid metabolic process; P:catabolic process; P:biosynthetic process; F:lyase activity; C:cytosol	EC:4.1.2; EC:4.1; EC:4.1.2.5; EC:4	Carbon-carbon lyases; Carbon-carbon lyases; L-threonine aldolase; Lyases	P:GO:0006520; F:GO:0003824; F:GO:0016829	P:cellular amino acid metabolic process; F:catalytic activity; F:lyase activity
000001F|arrow.g469.t1	peptidase M24	458	0	94.87	F:GO:0008233; F:GO:0043167	F:peptidase activity; F:ion binding	EC:3.4.11; EC:3.4; EC:3; EC:3.4.11.21; EC:3.4.11.6; EC:3.4.11.5; EC:3.4.11.9	Acting on peptide bonds (peptidases); Acting on peptide bonds (peptidases); Hydrolases; Aspartyl aminopeptidase; Aminopeptidase B; Prolyl aminopeptidase; Xaa-Pro aminopeptidase	F:GO:0016787	F:hydrolase activity
000001F|arrow.g470.t1	cytochrome P450	114	9.19028e-68	89.1	F:GO:0016491; F:GO:0043167; C:GO:0005575	F:oxidoreductase activity; F:ion binding; C:cellular_component	EC:1; EC:1.14	Oxidoreductases; Acting on paired donors, with incorporation or reduction of molecular oxygen. The oxygen incorporated need not be derived from O(2)	F:GO:0004497; F:GO:0005506; F:GO:0016705; F:GO:0020037	F:monooxygenase activity; F:iron ion binding; F:oxidoreductase activity, acting on paired donors, with incorporation or reduction of molecular oxygen; F:heme binding
000001F|arrow.g471.t1	glycoside hydrolase, family 71	187	5.68825e-66	61.3	P:GO:0005975; P:GO:0009056; F:GO:0016798; C:GO:0005575	P:carbohydrate metabolic process; P:catabolic process; F:hydrolase activity, acting on glycosyl bonds; C:cellular_component	EC:3.2; EC:3; EC:3.2.1.14; EC:3.2.1	Glycosylases; Hydrolases; Chitinase; Glycosylases	no GO terms	no GO terms
000001F|arrow.g472.t1	glyoxalase-like protein	304	0	91.02					no GO terms	no GO terms
000001F|arrow.g473.t1	predicted protein	1773	0	53.97	F:GO:0003674	F:molecular_function			F:GO:0005515	F:protein binding
000001F|arrow.g474.t1	putative alpha-galactosidase C	747	0	89.34	P:GO:0005975; P:GO:0009056; F:GO:0016798; C:GO:0005576	P:carbohydrate metabolic process; P:catabolic process; F:hydrolase activity, acting on glycosyl bonds; C:extracellular region	EC:3.2; EC:3; EC:3.2.1.22; EC:3.2.1	Glycosylases; Hydrolases; Alpha-galactosidase; Glycosylases	P:GO:0016052; F:GO:0003824; F:GO:0004557	P:carbohydrate catabolic process; F:catalytic activity; F:alpha-galactosidase activity
000001F|arrow.g475.t1	fungal-specific transcription factor domain-containing protein	512	0	75.27	P:GO:0009058; P:GO:0034641; F:GO:0003677; F:GO:0003700; F:GO:0022857; F:GO:0043167; C:GO:0005575	P:biosynthetic process; P:cellular nitrogen compound metabolic process; F:DNA binding; F:DNA-binding transcription factor activity; F:transmembrane transporter activity; F:ion binding; C:cellular_component	EC:7	Translocases	P:GO:0006351; P:GO:0006355; F:GO:0000981; F:GO:0003677; F:GO:0008270	P:transcription, DNA-templated; P:regulation of transcription, DNA-templated; F:DNA-binding transcription factor activity, RNA polymerase II-specific; F:DNA binding; F:zinc ion binding
000001F|arrow.g476.t1	HotDog domain-containing protein	174	3.50566e-120	85.11	F:GO:0016853	F:isomerase activity	EC:2; EC:5	Transferases; Isomerases	no GO terms	no GO terms
000001F|arrow.g477.t1	hypothetical protein ATETN484_0004041100	165	1.14188e-117	92.93					no IPS match	no IPS match
000001F|arrow.g478.t1	putative dihydroxy acid dehydratase	650	0	94.18	F:GO:0016829	F:lyase activity	EC:4	Lyases	F:GO:0003824	F:catalytic activity
000001F|arrow.g479.t1	dnaJ protein homolog xdj1	439	0	91.33	P:GO:0006457; P:GO:0006950; F:GO:0043167; F:GO:0051082	P:protein folding; P:response to stress; F:ion binding; F:unfolded protein binding			P:GO:0006457; P:GO:0009408; F:GO:0005524; F:GO:0030544; F:GO:0031072; F:GO:0051082	P:protein folding; P:response to heat; F:ATP binding; F:Hsp70 protein binding; F:heat shock protein binding; F:unfolded protein binding
000001F|arrow.g480.t1	glutamyl-tRNA synthetase	601	0	88.73	P:GO:0006399; P:GO:0006412; P:GO:0006520; F:GO:0003723; F:GO:0016874; F:GO:0043167	P:tRNA metabolic process; P:translation; P:cellular amino acid metabolic process; F:RNA binding; F:ligase activity; F:ion binding	EC:6.1; EC:6.1.1; EC:6; EC:6.1.1.17	Forming carbon-oxygen bonds; Forming carbon-oxygen bonds; Ligases; Glutamate--tRNA ligase	P:GO:0006424; P:GO:0043039; F:GO:0000049; F:GO:0000166; F:GO:0004812; F:GO:0004818; F:GO:0005524; F:GO:0008270	P:glutamyl-tRNA aminoacylation; P:tRNA aminoacylation; F:tRNA binding; F:nucleotide binding; F:aminoacyl-tRNA ligase activity; F:glutamate-tRNA ligase activity; F:ATP binding; F:zinc ion binding
000001F|arrow.g481.t1	putative microtubule associated protein	772	0	92.46	P:GO:0007010; F:GO:0008092	P:cytoskeleton organization; F:cytoskeletal protein binding			P:GO:0000226; F:GO:0008017	P:microtubule cytoskeleton organization; F:microtubule binding
000001F|arrow.g482.t1	COP9 signalosome complex subunit 5	335	0	95.66	F:GO:0008233; F:GO:0043167; C:GO:0005634; C:GO:0032991	F:peptidase activity; F:ion binding; C:nucleus; C:protein-containing complex	EC:3.4.24; EC:3.4.24.61; EC:3.4.24.23; EC:3.4.24.24; EC:3.4.24.69; EC:3.4.24.64; EC:3.4.24.21; EC:3.4.24.22; EC:3.4; EC:3.4.24.17; EC:3.4.24.18; EC:3.4.24.19; EC:3.4.24.70; EC:3.4.99; EC:3.4.24.71; EC:3.4.24.72; EC:3.4.24.56; EC:3.4.24.35; EC:3.4.24.57; EC:3.4.24.14; EC:3.4.24.37; EC:3.4.24.59; EC:3.4.24.11; EC:3.4.24.55; EC:3	Acting on peptide bonds (peptidases); Nardilysin; Matrilysin; Gelatinase A; Bontoxilysin; Mitochondrial processing peptidase; Astacin; Stromelysin 2; Acting on peptide bonds (peptidases); Stromelysin 1; Meprin A; Procollagen C-endopeptidase; Oligopeptidase A; Acting on peptide bonds (peptidases); Endothelin-converting enzyme 1; Fibrolase; Insulysin; Gelatinase B; O-sialoglycoprotein endopeptidase…	F:GO:0004222; F:GO:0005515; F:GO:0008237; F:GO:0070122; C:GO:0008180	F:metalloendopeptidase activity; F:protein binding; F:metallopeptidase activity; F:isopeptidase activity; C:COP9 signalosome
000001F|arrow.g483.t1	ras guanine nucleotide exchange factor domain-containing protein	1246	0	92.95	P:GO:0007165; P:GO:0051301; F:GO:0030234	P:signal transduction; P:cell division; F:enzyme regulator activity			P:GO:0007264; F:GO:0005085; F:GO:0005515	P:small GTPase mediated signal transduction; F:guanyl-nucleotide exchange factor activity; F:protein binding
000001F|arrow.g484.t1	fungal-specific transcription factor domain-containing protein	799	0	96.24	P:GO:0009058; P:GO:0034641; F:GO:0003677; F:GO:0043167	P:biosynthetic process; P:cellular nitrogen compound metabolic process; F:DNA binding; F:ion binding			P:GO:0006351; F:GO:0003677; F:GO:0008270	P:transcription, DNA-templated; F:DNA binding; F:zinc ion binding
000001F|arrow.g485.t1	CrcB-like protein-domain-containing protein	427	0	81.94	C:GO:0005886	C:plasma membrane			C:GO:0016021	C:integral component of membrane
000001F|arrow.g486.t1	PRTase-like protein	231	9.75635e-151	89.32	P:GO:0034641; P:GO:0044281; F:GO:0016757	P:cellular nitrogen compound metabolic process; P:small molecule metabolic process; F:transferase activity, transferring glycosyl groups	EC:2.4; EC:2	Glycosyltransferases; Transferases	P:GO:0009116	P:nucleoside metabolic process
000001F|arrow.g487.t1	predicted protein	139	1.05232e-83	77.75					no GO terms	no GO terms
000001F|arrow.g488.t1	Alpha/Beta hydrolase protein	353	0	87.09	F:GO:0003674	F:molecular_function	EC:3	Hydrolases	F:GO:0003824	F:catalytic activity
000001F|arrow.g489.t1	DNA-directed RNA polymerase III RPC4	577	0	72.67	P:GO:0009058; P:GO:0034641; F:GO:0003677; F:GO:0016779; C:GO:0005634; C:GO:0032991	P:biosynthetic process; P:cellular nitrogen compound metabolic process; F:DNA binding; F:nucleotidyltransferase activity; C:nucleus; C:protein-containing complex	EC:2.7; EC:2; EC:2.7.7; EC:2.7.7.6	Transferring phosphorus-containing groups; Transferases; Transferring phosphorus-containing groups; DNA-directed RNA polymerase	P:GO:0006383; F:GO:0003677; C:GO:0005666	P:transcription by RNA polymerase III; F:DNA binding; C:RNA polymerase III complex
000001F|arrow.g490.t1	putative C6 finger domain protein	687	0	88.74	P:GO:0009058; P:GO:0034641; F:GO:0003700; F:GO:0043167	P:biosynthetic process; P:cellular nitrogen compound metabolic process; F:DNA-binding transcription factor activity; F:ion binding			P:GO:0006355; F:GO:0000981; F:GO:0008270	P:regulation of transcription, DNA-templated; F:DNA-binding transcription factor activity, RNA polymerase II-specific; F:zinc ion binding
000001F|arrow.g491.t1	cyclin-like protein	613	0	84.14					no GO terms	no GO terms
000001F|arrow.g492.t1	P-loop containing nucleoside triphosphate hydrolase protein	1347	0	92.74	F:GO:0004386; F:GO:0016757; F:GO:0043167	F:helicase activity; F:transferase activity, transferring glycosyl groups; F:ion binding	EC:3.6.1; EC:2.4; EC:3.6; EC:2; EC:3; EC:3.6.1.15	Acting on acid anhydrides; Glycosyltransferases; Acting on acid anhydrides; Transferases; Hydrolases; Nucleoside-triphosphate phosphatase	F:GO:0003676; F:GO:0004386; F:GO:0005515; F:GO:0005524	F:nucleic acid binding; F:helicase activity; F:protein binding; F:ATP binding
000001F|arrow.g493.t1	HIT-like domain-containing protein	273	0	88.63	P:GO:0006259; P:GO:0006950; F:GO:0003677; F:GO:0004518; F:GO:0043167	P:DNA metabolic process; P:response to stress; F:DNA binding; F:nuclease activity; F:ion binding	EC:3.1; EC:3.1.11; EC:3; EC:3.1.15	Acting on ester bonds; Acting on ester bonds; Hydrolases; Acting on ester bonds	P:GO:0006281; F:GO:0003677; F:GO:0033699	P:DNA repair; F:DNA binding; F:DNA 5'-adenosine monophosphate hydrolase activity
000001F|arrow.g494.t1	putative translocon-associated protein, alpha subunit	256	0	90.27	C:GO:0005783	C:endoplasmic reticulum			C:GO:0005789	C:endoplasmic reticulum membrane
000001F|arrow.g495.t1	C-x8-C-x5-C-x3-H type zinc finger protein	458	0	89.67	F:GO:0043167	F:ion binding			F:GO:0046872	F:metal ion binding
000001F|arrow.g496.t1	telomere-binding alpha subunit central domain protein	583	0	67.56	P:GO:0006259; P:GO:0042592; P:GO:0051276; F:GO:0003677; C:GO:0005694	P:DNA metabolic process; P:homeostatic process; P:chromosome organization; F:DNA binding; C:chromosome			P:GO:0000723; F:GO:0003677; F:GO:0043047; C:GO:0000781	P:telomere maintenance; F:DNA binding; F:single-stranded telomeric DNA binding; C:chromosome, telomeric region
000001F|arrow.g497.t1	armadillo-type protein	552	0	99.28	P:GO:0006913; P:GO:0015031; F:GO:0003674; C:GO:0005654; C:GO:0005737	P:nucleocytoplasmic transport; P:protein transport; F:molecular_function; C:nucleoplasm; C:cytoplasm			P:GO:0006606; F:GO:0005515; F:GO:0061608; C:GO:0005737	P:protein import into nucleus; F:protein binding; F:nuclear import signal receptor activity; C:cytoplasm
000001F|arrow.g498.t1	putative nuclear cohesin complex subunit	1197	0	84.58					no GO terms	no GO terms
000001F|arrow.g499.t1	urease accessory protein UreD	362	0	89.67	P:GO:0008150; F:GO:0043167	P:biological_process; F:ion binding			P:GO:0006807; F:GO:0016151	P:nitrogen compound metabolic process; F:nickel cation binding
000001F|arrow.g500.t1	PLC-like phosphodiesterase	479	0	79.34	P:GO:0006629; F:GO:0003674; C:GO:0005575	P:lipid metabolic process; F:molecular_function; C:cellular_component	EC:3.1.4; EC:3.1; EC:3	Acting on ester bonds; Acting on ester bonds; Hydrolases	P:GO:0006629; F:GO:0008081	P:lipid metabolic process; F:phosphoric diester hydrolase activity
000001F|arrow.g501.t1	predicted protein	323	3.74161e-172	80.17					no GO terms	no GO terms
000001F|arrow.g502.t1	rRNA biogenesis protein RRP5	1808	0	91.49	P:GO:0006397; P:GO:0042254; F:GO:0003674; C:GO:0005730	P:mRNA processing; P:ribosome biogenesis; F:molecular_function; C:nucleolus			P:GO:0006396; F:GO:0003676; F:GO:0005515	P:RNA processing; F:nucleic acid binding; F:protein binding
000001F|arrow.g503.t1	WD domain protein	510	0	92.05	F:GO:0003674	F:molecular_function			F:GO:0005515	F:protein binding
000001F|arrow.g504.t1	chaperonin Cpn60/TCP-1 family	566	0	97	P:GO:0006457; F:GO:0016887; F:GO:0043167; F:GO:0051082; C:GO:0005829; C:GO:0032991	P:protein folding; F:ATPase activity; F:ion binding; F:unfolded protein binding; C:cytosol; C:protein-containing complex	EC:3.6.1; EC:3.6; EC:3; EC:3.6.1.15	Acting on acid anhydrides; Acting on acid anhydrides; Hydrolases; Nucleoside-triphosphate phosphatase	P:GO:0006457; F:GO:0005524; F:GO:0016887; F:GO:0051082	P:protein folding; F:ATP binding; F:ATPase activity; F:unfolded protein binding
000001F|arrow.g505.t1	prolyl-tRNA synthetase	592	0	93.62	P:GO:0006399; P:GO:0006412; P:GO:0006520; F:GO:0016874; F:GO:0043167; C:GO:0005737	P:tRNA metabolic process; P:translation; P:cellular amino acid metabolic process; F:ligase activity; F:ion binding; C:cytoplasm	EC:6.1; EC:6.1.1; EC:6.1.1.15; EC:6	Forming carbon-oxygen bonds; Forming carbon-oxygen bonds; Proline--tRNA ligase; Ligases	P:GO:0006418; P:GO:0006433; F:GO:0000166; F:GO:0004812; F:GO:0004827; F:GO:0005524; C:GO:0005737	P:tRNA aminoacylation for protein translation; P:prolyl-tRNA aminoacylation; F:nucleotide binding; F:aminoacyl-tRNA ligase activity; F:proline-tRNA ligase activity; F:ATP binding; C:cytoplasm
000001F|arrow.g506.t1	predicted protein	729	0	74.1					no GO terms	no GO terms
000001F|arrow.g507.t1	predicted protein	105	2.55934e-58	68.96					no GO terms	no GO terms
000001F|arrow.g508.t1	3' exoribonuclease family, domain 1-domain-containing protein	321	0	94.76	P:GO:0006629; P:GO:0009058; F:GO:0008168; C:GO:0005783	P:lipid metabolic process; P:biosynthetic process; F:methyltransferase activity; C:endoplasmic reticulum	EC:2.1; EC:2; EC:2.1.1.17; EC:2.1.1	Transferring one-carbon groups; Transferases; Phosphatidylethanolamine N-methyltransferase; Transferring one-carbon groups	no GO terms	no GO terms
000001F|arrow.g509.t1	phosphatidylethanolamine N-methyltransferase	967	0	94.22	P:GO:0006629; P:GO:0009058; F:GO:0008168; C:GO:0005783	P:lipid metabolic process; P:biosynthetic process; F:methyltransferase activity; C:endoplasmic reticulum	EC:2.1; EC:2; EC:2.1.1.17; EC:2.1.1	Transferring one-carbon groups; Transferases; Phosphatidylethanolamine N-methyltransferase; Transferring one-carbon groups	P:GO:0006644; F:GO:0004608	P:phospholipid metabolic process; F:phosphatidylethanolamine N-methyltransferase activity
000001F|arrow.g510.t1	P-loop containing nucleoside triphosphate hydrolase protein	343	0	95.67	P:GO:0006790; P:GO:0022607; F:GO:0016887; F:GO:0043167; C:GO:0005737	P:sulfur compound metabolic process; P:cellular component assembly; F:ATPase activity; F:ion binding; C:cytoplasm	EC:3.6.1; EC:3.6; EC:3; EC:3.6.1.15	Acting on acid anhydrides; Acting on acid anhydrides; Hydrolases; Nucleoside-triphosphate phosphatase	P:GO:0016226; F:GO:0005524; F:GO:0016887; F:GO:0051536; F:GO:0051539	P:iron-sulfur cluster assembly; F:ATP binding; F:ATPase activity; F:iron-sulfur cluster binding; F:4 iron, 4 sulfur cluster binding
000001F|arrow.g511.t1	aspartic peptidase domain-containing protein	424	0	85.74	F:GO:0008233	F:peptidase activity	EC:3.4.99; EC:3.4.23.1; EC:3.4.23; EC:3.4.23.32; EC:3.4.23.43; EC:3.4.23.20; EC:3.4.23.25; EC:3.4.23.36; EC:3.4.23.4; EC:3.4.23.35; EC:3.4.23.5; EC:3.4.23.34; EC:3.4.23.15; EC:3.4; EC:3	Acting on peptide bonds (peptidases); Pepsin A; Acting on peptide bonds (peptidases); Scytalidopepsin B; Prepilin peptidase; Penicillopepsin; Saccharopepsin; Signal peptidase II; Chymosin; Barrierpepsin; Cathepsin D; Cathepsin E; Renin; Acting on peptide bonds (peptidases); Hydrolases	P:GO:0006508; F:GO:0004190	P:proteolysis; F:aspartic-type endopeptidase activity
000001F|arrow.g512.t1	MFS general substrate transporter	519	0	87.25	F:GO:0022857; C:GO:0005575	F:transmembrane transporter activity; C:cellular_component	EC:7	Translocases	P:GO:0055085; F:GO:0022857	P:transmembrane transport; F:transmembrane transporter activity
000001F|arrow.g513.t1	leucoanthocyanidin dioxygenase	309	0	92.3	F:GO:0016491; F:GO:0043167	F:oxidoreductase activity; F:ion binding	EC:1	Oxidoreductases	F:GO:0016491	F:oxidoreductase activity
000001F|arrow.g514.t1	alpha/beta-hydrolase	331	0	88.74	F:GO:0003674	F:molecular_function	EC:3	Hydrolases	F:GO:0016787	F:hydrolase activity
000001F|arrow.g515.t1	oxidoreductase	476	0	85.23	F:GO:0016491; F:GO:0043167	F:oxidoreductase activity; F:ion binding	EC:1	Oxidoreductases	F:GO:0003824; F:GO:0016491; F:GO:0020037	F:catalytic activity; F:oxidoreductase activity; F:heme binding
000001F|arrow.g516.t1	predicted protein	636	0	80.39	P:GO:0009058; P:GO:0034641; F:GO:0003677; F:GO:0043167; C:GO:0005575	P:biosynthetic process; P:cellular nitrogen compound metabolic process; F:DNA binding; F:ion binding; C:cellular_component			P:GO:0006351; F:GO:0003677; F:GO:0008270	P:transcription, DNA-templated; F:DNA binding; F:zinc ion binding
000001F|arrow.g517.t1	phosphoglycerate mutase-like protein	547	0	78.72	F:GO:0016791	F:phosphatase activity	EC:3.1; EC:3.1.3.8; EC:3; EC:3.1.3	Acting on ester bonds; 3-phytase; Hydrolases; Acting on ester bonds	no GO terms	no GO terms
000001F|arrow.g518.t1	cofactor for methionyl and glutamyl-tRNA synthetase	443	0	90.2	F:GO:0003723; F:GO:0016874	F:RNA binding; F:ligase activity	EC:6.1; EC:6.1.1; EC:6	Forming carbon-oxygen bonds; Forming carbon-oxygen bonds; Ligases	F:GO:0000049	F:tRNA binding
000001F|arrow.g519.t1	TPA: LysM domain protein, putative (AFU_orthologue; AFUA_5G03980)	516	1.06161e-81	65.3	C:GO:0016020; C:GO:0016021	C:membrane; C:integral component of membrane			no GO terms	no GO terms
000001F|arrow.g520.t1	Killer toxin subunits alpha/beta	619	0	71.63	P:GO:0005975; P:GO:0009056; F:GO:0016798	P:carbohydrate metabolic process; P:catabolic process; F:hydrolase activity, acting on glycosyl bonds	EC:3.2; EC:3; EC:3.2.1	Glycosylases; Hydrolases; Glycosylases	no GO terms	no GO terms
000001F|arrow.g521.t1	alcohol dehydrogenase	353	0	89.97	P:GO:0006520; P:GO:0009058; F:GO:0016491; F:GO:0043167	P:cellular amino acid metabolic process; P:biosynthetic process; F:oxidoreductase activity; F:ion binding	EC:1.1.1.4; EC:1.1; EC:1; EC:1.1.1.103; EC:1.1.1	(R,R)-butanediol dehydrogenase; Acting on the CH-OH group of donors; Oxidoreductases; L-threonine 3-dehydrogenase; Acting on the CH-OH group of donors	F:GO:0008270; F:GO:0016491	F:zinc ion binding; F:oxidoreductase activity
000001F|arrow.g522.t1	glycosyltransferase family protein	344	0	93.23	F:GO:0016491; C:GO:0005575	F:oxidoreductase activity; C:cellular_component	EC:1; EC:2	Oxidoreductases; Transferases	F:GO:0016491	F:oxidoreductase activity
000001F|arrow.g523.t1	Anp1-domain-containing protein	515	0	90.6	C:GO:0005575	C:cellular_component			no GO terms	no GO terms
000001F|arrow.g524.t1	sister chromatid cohesion protein Dcc1	401	0	81.04	P:GO:0007059; P:GO:0009058; P:GO:0051276; P:GO:0140014; C:GO:0005694; C:GO:0032991	P:chromosome segregation; P:biosynthetic process; P:chromosome organization; P:mitotic nuclear division; C:chromosome; C:protein-containing complex			P:GO:0007064; C:GO:0031390	P:mitotic sister chromatid cohesion; C:Ctf18 RFC-like complex
000001F|arrow.g525.t1	GNAT family acetyltransferase	392	0	81.82	F:GO:0016746	F:transferase activity, transferring acyl groups	EC:2.3; EC:2; EC:2.3.1	Acyltransferases; Transferases; Acyltransferases	no GO terms	no GO terms
000001F|arrow.g526.t1	isoform 2 of E3 ubiquitin-protein ligase RNF216	738	0	61.56	F:GO:0046872	F:metal ion binding			no GO terms	no GO terms
000001F|arrow.g527.t1	DNA-binding protein	279	0	91.98	F:GO:0003677	F:DNA binding			no GO terms	no GO terms
000001F|arrow.g528.t1	armadillo-type protein	1039	0	95.43	P:GO:0015031; F:GO:0019899	P:protein transport; F:enzyme binding			P:GO:0006886; F:GO:0031267	P:intracellular protein transport; F:small GTPase binding
000001F|arrow.g529.t1	putative TAM domain methyltransferase	333	0	88.25	P:GO:0008150; F:GO:0008168	P:biological_process; F:methyltransferase activity	EC:2.1; EC:2; EC:2.1.1	Transferring one-carbon groups; Transferases; Transferring one-carbon groups	no GO terms	no GO terms
000001F|arrow.g530.t1	phytanoyl-CoA dioxygenase family protein	312	0	88.72	F:GO:0016491	F:oxidoreductase activity	EC:1	Oxidoreductases	no GO terms	no GO terms
000001F|arrow.g531.t1	HET-C domain protein HetC	795	0	84.46					no GO terms	no GO terms
000001F|arrow.g532.t1	alkylglycerol monooxygenase	345	0	87.38	P:GO:0006629; P:GO:0009058; F:GO:0016491; F:GO:0043167; C:GO:0005575	P:lipid metabolic process; P:biosynthetic process; F:oxidoreductase activity; F:ion binding; C:cellular_component	EC:1	Oxidoreductases	P:GO:0008610; F:GO:0005506; F:GO:0016491	P:lipid biosynthetic process; F:iron ion binding; F:oxidoreductase activity
000001F|arrow.g533.t1	TRAF-like signal transducer	447	0	89.05	P:GO:0006259; P:GO:0006950; F:GO:0003677; F:GO:0043167; C:GO:0005737	P:DNA metabolic process; P:response to stress; F:DNA binding; F:ion binding; C:cytoplasm			F:GO:0005515; F:GO:0008270	F:protein binding; F:zinc ion binding
000001F|arrow.g534.t1	SNARE complex subunit	269	0	89.46	C:GO:0005575	C:cellular_component			no GO terms	no GO terms
000001F|arrow.g535.t1	hypothetical protein ATETN484_0004055500	107	5.84145e-65	82.88					no GO terms	no GO terms
000001F|arrow.g536.t1	conserved hypothetical protein	198	2.28514e-142	95.65					no GO terms	no GO terms
000001F|arrow.g537.t1	RNA polymerase II holoenzyme cyclin-like subunit	302	0	97.15	P:GO:0006464; P:GO:0007049; P:GO:0009058; P:GO:0034641; F:GO:0016301; F:GO:0030234; C:GO:0005634; C:GO:0032991	P:cellular protein modification process; P:cell cycle; P:biosynthetic process; P:cellular nitrogen compound metabolic process; F:kinase activity; F:enzyme regulator activity; C:nucleus; C:protein-containing complex	EC:2.7.1; EC:2.7; EC:2	Transferring phosphorus-containing groups; Transferring phosphorus-containing groups; Transferases	P:GO:0006357; F:GO:0016538; C:GO:0016592	P:regulation of transcription by RNA polymerase II; F:cyclin-dependent protein serine/threonine kinase regulator activity; C:mediator complex
000001F|arrow.g538.t1	mitochondrial carrier domain-containing protein	593	0	92.27	F:GO:0022857; F:GO:0043167; C:GO:0005739	F:transmembrane transporter activity; F:ion binding; C:mitochondrion	EC:7	Translocases	P:GO:0055085; F:GO:0005509	P:transmembrane transport; F:calcium ion binding
000001F|arrow.g539.t1	ubiquitin-activating enzyme E1	1460	0	91.56	P:GO:0006464; P:GO:0006790; P:GO:0034641; F:GO:0016765; F:GO:0016874; F:GO:0043167	P:cellular protein modification process; P:sulfur compound metabolic process; P:cellular nitrogen compound metabolic process; F:transferase activity, transferring alkyl or aryl (other than methyl) groups; F:ligase activity; F:ion binding	EC:2.5.1; EC:2.5.1.18; EC:2.5; EC:2; EC:6.2; EC:6	Transferring alkyl or aryl groups, other than methyl groups; Glutathione transferase; Transferring alkyl or aryl groups, other than methyl groups; Transferases; Forming carbon-sulfur bonds; Ligases	P:GO:0006464; P:GO:0006749; F:GO:0004364; F:GO:0005515; F:GO:0008641	P:cellular protein modification process; P:glutathione metabolic process; F:glutathione transferase activity; F:protein binding; F:ubiquitin-like modifier activating enzyme activity
000001F|arrow.g540.t1	gamma-tubulin complex component GCP4	798	0	84.91	P:GO:0007010; P:GO:0065003; F:GO:0008092; C:GO:0005737; C:GO:0005815	P:cytoskeleton organization; P:protein-containing complex assembly; F:cytoskeletal protein binding; C:cytoplasm; C:microtubule organizing center			P:GO:0000226; P:GO:0007020; F:GO:0043015; C:GO:0000922; C:GO:0005815	P:microtubule cytoskeleton organization; P:microtubule nucleation; F:gamma-tubulin binding; C:spindle pole; C:microtubule organizing center
000001F|arrow.g541.t1	hypothetical protein BDV38DRAFT_241022	353	0	94.84					no GO terms	no GO terms
000001F|arrow.g542.t1	NAD(P)-binding protein	320	0	93.34	F:GO:0016491	F:oxidoreductase activity	EC:1	Oxidoreductases	F:GO:0016491	F:oxidoreductase activity
000001F|arrow.g543.t1	Oxidoreductase family NAD-binding Rossmann fold	354	0	87.42	F:GO:0016491	F:oxidoreductase activity	EC:1	Oxidoreductases	F:GO:0000166	F:nucleotide binding
000001F|arrow.g544.t1	Clavaminate synthase-like protein	336	0	85.68	F:GO:0016491	F:oxidoreductase activity	EC:1	Oxidoreductases	no GO terms	no GO terms
000001F|arrow.g545.t1	putative short chain dehydrogenase/reductase	276	9.26874e-146	69.45	F:GO:0016491	F:oxidoreductase activity	EC:1	Oxidoreductases	F:GO:0016491	F:oxidoreductase activity
000001F|arrow.g546.t1	Alpha/Beta hydrolase protein	575	0	93.76	F:GO:0008233	F:peptidase activity	EC:3.4; EC:3.4.14.1; EC:3; EC:3.4.14.5; EC:3.4.14.4; EC:3.4.14.2; EC:3.4.14.11	Acting on peptide bonds (peptidases); Dipeptidyl-peptidase I; Hydrolases; Dipeptidyl-peptidase IV; Dipeptidyl-peptidase III; Dipeptidyl-peptidase II; Xaa-Pro dipeptidyl-peptidase	F:GO:0008239; F:GO:0016787	F:dipeptidyl-peptidase activity; F:hydrolase activity
000001F|arrow.g547.t1	Phytanoyl-CoA dioxygenase PhyH	328	0	91.21	F:GO:0016491; F:GO:0022857; C:GO:0005575	F:oxidoreductase activity; F:transmembrane transporter activity; C:cellular_component	EC:1; EC:7	Oxidoreductases; Translocases	no GO terms	no GO terms
000001F|arrow.g548.t1	Major Facilitator Superfamily protein	542	0	85.04	F:GO:0016491; F:GO:0022857; C:GO:0005575	F:oxidoreductase activity; F:transmembrane transporter activity; C:cellular_component	EC:1; EC:7	Oxidoreductases; Translocases	P:GO:0055085; F:GO:0022857; C:GO:0016021	P:transmembrane transport; F:transmembrane transporter activity; C:integral component of membrane
000001F|arrow.g549.t1	fungal-specific transcription factor domain-containing protein	643	0	72.86	P:GO:0009058; P:GO:0034641; F:GO:0003677; F:GO:0043167; C:GO:0005575	P:biosynthetic process; P:cellular nitrogen compound metabolic process; F:DNA binding; F:ion binding; C:cellular_component			P:GO:0006351; F:GO:0003677; F:GO:0008270	P:transcription, DNA-templated; F:DNA binding; F:zinc ion binding
000001F|arrow.g550.t1	putative MFS transporter	462	0	88.23	F:GO:0022857; C:GO:0005575	F:transmembrane transporter activity; C:cellular_component	EC:7	Translocases	P:GO:0055085; F:GO:0022857	P:transmembrane transport; F:transmembrane transporter activity
000001F|arrow.g551.t1	major facilitator superfamily MFS_1	304	6.26272e-154	67.22	F:GO:0022857; C:GO:0005575	F:transmembrane transporter activity; C:cellular_component	EC:7	Translocases	no GO terms	no GO terms
000001F|arrow.g552.t1	Gamma interferon inducible lysosomal thiol reductase GILT	299	2.22215e-165	73.11	C:GO:0005575	C:cellular_component			no GO terms	no GO terms
000001F|arrow.g553.t1	putative hexokinase family protein XprF	621	0	89.82	P:GO:0005975; P:GO:0006091; P:GO:0009056; P:GO:0034641; P:GO:0042592; P:GO:0044281; F:GO:0016301; F:GO:0043167	P:carbohydrate metabolic process; P:generation of precursor metabolites and energy; P:catabolic process; P:cellular nitrogen compound metabolic process; P:homeostatic process; P:small molecule metabolic process; F:kinase activity; F:ion binding	EC:2.7.1; EC:2.7; EC:2; EC:2.7.1.1	Transferring phosphorus-containing groups; Transferring phosphorus-containing groups; Transferases; Hexokinase	P:GO:0001678; P:GO:0005975; F:GO:0004396; F:GO:0005524; F:GO:0005536; F:GO:0016773	P:cellular glucose homeostasis; P:carbohydrate metabolic process; F:hexokinase activity; F:ATP binding; F:glucose binding; F:phosphotransferase activity, alcohol group as acceptor
000001F|arrow.g554.t1	predicted protein	369	0	73.51					no GO terms	no GO terms
000001F|arrow.g555.t1	transcription initiation factor iia small chain	111	4.72962e-77	96.55	P:GO:0065003; F:GO:0003677; F:GO:0008134; F:GO:0008135; C:GO:0005654; C:GO:0032991	P:protein-containing complex assembly; F:DNA binding; F:transcription factor binding; F:translation factor activity, RNA binding; C:nucleoplasm; C:protein-containing complex			P:GO:0006367; C:GO:0005672	P:transcription initiation from RNA polymerase II promoter; C:transcription factor TFIIA complex
000001F|arrow.g556.t1	predicted protein	298	1.20755e-156	63.17	P:GO:0009058; P:GO:0034641; P:GO:0044281; F:GO:0016829	P:biosynthetic process; P:cellular nitrogen compound metabolic process; P:small molecule metabolic process; F:lyase activity	EC:4.2.1; EC:4.2; EC:4.2.1.96; EC:4	Carbon-oxygen lyases; Carbon-oxygen lyases; 4a-hydroxytetrahydrobiopterin dehydratase; Lyases	no IPS match	no IPS match
000001F|arrow.g557.t1	predicted protein	349	1.63865e-173	67.33					no GO terms	no GO terms
000001F|arrow.g558.t1	hypothetical protein ATETN484_0004054200	93	1.92832e-54	78.79					no IPS match	no IPS match
000001F|arrow.g559.t1	predicted protein	279	8.07801e-114	53.24					no GO terms	no GO terms
000001F|arrow.g560.t1	N-methyltransferase, putative	833	0	86.5	P:GO:0008150; F:GO:0008168; F:GO:0016491	P:biological_process; F:methyltransferase activity; F:oxidoreductase activity	EC:1.2; EC:2.1; EC:1; EC:2; EC:2.1.1; EC:1.2.1	Acting on the aldehyde or oxo group of donors; Transferring one-carbon groups; Oxidoreductases; Transferases; Transferring one-carbon groups; Acting on the aldehyde or oxo group of donors	no GO terms	no GO terms
000001F|arrow.g561.t1	predicted protein	261	6.81101e-147	54.61	F:GO:0003674	F:molecular_function			F:GO:0005515	F:protein binding
000001F|arrow.g562.t1	transmembrane protein 19	359	0	77.05	C:GO:0005575	C:cellular_component			C:GO:0016021	C:integral component of membrane
000001F|arrow.g563.t1	putative pyruvate formate lyase activating enzyme	389	0	89.68	F:GO:0016829; F:GO:0043167; C:GO:0005575	F:lyase activity; F:ion binding; C:cellular_component	EC:4	Lyases	F:GO:0003824; F:GO:0051536	F:catalytic activity; F:iron-sulfur cluster binding
000001F|arrow.g564.t1	Xylanolytic transcriptional activator xlnR	963	0	90.09	P:GO:0005975; P:GO:0009056; P:GO:0009058; P:GO:0034641; P:GO:0071554; F:GO:0003677; F:GO:0003700; F:GO:0043167	P:carbohydrate metabolic process; P:catabolic process; P:biosynthetic process; P:cellular nitrogen compound metabolic process; P:cell wall organization or biogenesis; F:DNA binding; F:DNA-binding transcription factor activity; F:ion binding			P:GO:0006351; P:GO:0006355; F:GO:0000981; F:GO:0003677; F:GO:0008270	P:transcription, DNA-templated; P:regulation of transcription, DNA-templated; F:DNA-binding transcription factor activity, RNA polymerase II-specific; F:DNA binding; F:zinc ion binding
000001F|arrow.g565.t1	DNA-dependent RNA polymerase family protein	1649	0	88.71	P:GO:0009058; P:GO:0034641; F:GO:0003677; F:GO:0016779; C:GO:0005634	P:biosynthetic process; P:cellular nitrogen compound metabolic process; F:DNA binding; F:nucleotidyltransferase activity; C:nucleus	EC:2.7; EC:2; EC:2.7.7; EC:2.7.7.6	Transferring phosphorus-containing groups; Transferases; Transferring phosphorus-containing groups; DNA-directed RNA polymerase	P:GO:0006351; F:GO:0003677; F:GO:0003899; C:GO:0005634	P:transcription, DNA-templated; F:DNA binding; F:DNA-directed 5'-3' RNA polymerase activity; C:nucleus
000001F|arrow.g566.t1	AhpC/TSA antioxidant enzyme-domain-containing protein	209	3.48789e-123	76.97	P:GO:0055114	P:obsolete oxidation-reduction process			no GO terms	no GO terms
000001F|arrow.g567.t1	sulfite reductase beta subunit	1529	0	95.53	P:GO:0006520; P:GO:0006790; P:GO:0009058; F:GO:0016491; F:GO:0043167; C:GO:0032991	P:cellular amino acid metabolic process; P:sulfur compound metabolic process; P:biosynthetic process; F:oxidoreductase activity; F:ion binding; C:protein-containing complex	EC:1.8.1; EC:1.6; EC:1.8.1.2; EC:1; EC:1.8	Acting on a sulfur group of donors; Acting on NADH or NADPH; Assimilatory sulfite reductase (NADPH); Oxidoreductases; Acting on a sulfur group of donors	F:GO:0003824; F:GO:0010181; F:GO:0016491; F:GO:0020037; F:GO:0051536	F:catalytic activity; F:FMN binding; F:oxidoreductase activity; F:heme binding; F:iron-sulfur cluster binding
000001F|arrow.g568.t1	Inositolphosphorylceramide synthase subunit Kei1-domain-containing protein	318	0	94.43	P:GO:0006629; F:GO:0030234; C:GO:0005575	P:lipid metabolic process; F:enzyme regulator activity; C:cellular_component			P:GO:0006673; F:GO:0070917	P:inositol phosphoceramide metabolic process; F:inositol phosphoceramide synthase regulator activity
000001F|arrow.g569.t1	Ras-related protein Rab-6A	208	1.75636e-154	98.8	P:GO:0006914; P:GO:0015031; P:GO:0016192; P:GO:0022607; F:GO:0003924; F:GO:0043167; C:GO:0005829	P:autophagy; P:protein transport; P:vesicle-mediated transport; P:cellular component assembly; F:GTPase activity; F:ion binding; C:cytosol	EC:3.6.1; EC:3.6; EC:3; EC:3.6.1.15	Acting on acid anhydrides; Acting on acid anhydrides; Hydrolases; Nucleoside-triphosphate phosphatase	F:GO:0003924; F:GO:0005525	F:GTPase activity; F:GTP binding
000001F|arrow.g570.t1	putative V-ATPase proteolipid subunit Ppa1	199	1.57983e-132	95.53	F:GO:0022857; C:GO:0032991	F:transmembrane transporter activity; C:protein-containing complex	EC:7	Translocases	P:GO:1902600; F:GO:0015078; C:GO:0033177; C:GO:0033179	P:proton transmembrane transport; F:proton transmembrane transporter activity; C:proton-transporting two-sector ATPase complex, proton-transporting domain; C:proton-transporting V-type ATPase, V0 domain
000001F|arrow.g571.t1	isoform 5 of gephyrin	711	0	91.68	P:GO:0009058; F:GO:0016779; F:GO:0043167	P:biosynthetic process; F:nucleotidyltransferase activity; F:ion binding	EC:2.10.1.1; EC:2.7; EC:2; EC:2.7.7.75; EC:2.7.7	Molybdopterin molybdotransferase; Transferring phosphorus-containing groups; Transferases; Molybdopterin adenylyltransferase; Transferring phosphorus-containing groups	P:GO:0006777; P:GO:0032324	P:Mo-molybdopterin cofactor biosynthetic process; P:molybdopterin cofactor biosynthetic process
000001F|arrow.g572.t1	acetyl-CoA synthetase-like protein	930	0	69.03	P:GO:0009058; F:GO:0003674	P:biosynthetic process; F:molecular_function	EC:3.1; EC:2; EC:3	Acting on ester bonds; Transferases; Hydrolases	P:GO:0009058; F:GO:0031177	P:biosynthetic process; F:phosphopantetheine binding
000001F|arrow.g573.t1	putative methyltransferase	271	1.04505e-163	68.13	F:GO:0008168	F:methyltransferase activity	EC:2.1; EC:2; EC:2.1.1	Transferring one-carbon groups; Transferases; Transferring one-carbon groups	no GO terms	no GO terms
000001F|arrow.g574.t1	DDHD domain-containing protein	957	0	83.13	F:GO:0043167	F:ion binding			F:GO:0046872	F:metal ion binding
000001F|arrow.g575.t1	DDHD domain protein	393	0	73.77	F:GO:0043167	F:ion binding			no GO terms	no GO terms
000001F|arrow.g576.t1	FAD binding domain-containing protein	635	0	95.57	P:GO:0006397; P:GO:0006399; P:GO:0022618; F:GO:0003723; F:GO:0016491; F:GO:0043167; C:GO:0005634; C:GO:0032991	P:mRNA processing; P:tRNA metabolic process; P:ribonucleoprotein complex assembly; F:RNA binding; F:oxidoreductase activity; F:ion binding; C:nucleus; C:protein-containing complex	EC:1	Oxidoreductases	F:GO:0071949	F:FAD binding
000001F|arrow.g577.t1	DUF866 domain protein	242	1.22995e-178	96.32	P:GO:0006397; P:GO:0006399; P:GO:0022618; F:GO:0003723; C:GO:0005634; C:GO:0032991	P:mRNA processing; P:tRNA metabolic process; P:ribonucleoprotein complex assembly; F:RNA binding; C:nucleus; C:protein-containing complex			P:GO:0000387; C:GO:0005681	P:spliceosomal snRNP assembly; C:spliceosomal complex
000001F|arrow.g578.t1	TPR domain protein	558	0	87.38	F:GO:0043167	F:ion binding	EC:3.1; EC:3; EC:3.1.1; EC:3.1.1.1	Acting on ester bonds; Hydrolases; Acting on ester bonds; Carboxylesterase	F:GO:0005515	F:protein binding
000001F|arrow.g579.t1	tannase-domain-containing protein	515	0	76.31	P:GO:0005975; P:GO:0009056; F:GO:0043167	P:carbohydrate metabolic process; P:catabolic process; F:ion binding	EC:3.1; EC:3; EC:3.1.1; EC:3.1.1.1	Acting on ester bonds; Hydrolases; Acting on ester bonds; Carboxylesterase	no GO terms	no GO terms
000001F|arrow.g580.t1	predicted protein	636	0	71.42	P:GO:0009058; P:GO:0034641; F:GO:0003677; F:GO:0003700; F:GO:0016491; F:GO:0043167	P:biosynthetic process; P:cellular nitrogen compound metabolic process; F:DNA binding; F:DNA-binding transcription factor activity; F:oxidoreductase activity; F:ion binding	EC:1	Oxidoreductases	P:GO:0006351; P:GO:0006355; F:GO:0000981; F:GO:0003677; F:GO:0008270	P:transcription, DNA-templated; P:regulation of transcription, DNA-templated; F:DNA-binding transcription factor activity, RNA polymerase II-specific; F:DNA binding; F:zinc ion binding
000001F|arrow.g581.t1	aldo/keto reductase	553	0	80.47	F:GO:0016491	F:oxidoreductase activity	EC:1.1; EC:1; EC:1.1.1; EC:1.1.1.122	Acting on the CH-OH group of donors; Oxidoreductases; Acting on the CH-OH group of donors; D-threo-aldose 1-dehydrogenase	F:GO:0016491; F:GO:0047834	F:oxidoreductase activity; F:D-threo-aldose 1-dehydrogenase activity
000001F|arrow.g582.t1	amino acid permease	543	0	88.93	P:GO:0055085; C:GO:0005575	P:transmembrane transport; C:cellular_component			P:GO:0055085; C:GO:0016020	P:transmembrane transport; C:membrane
000001F|arrow.g583.t1	hypothetical protein PENARI_c002G09509	113	3.77865e-73	91.83					no GO terms	no GO terms
000001F|arrow.g584.t1	predicted protein	303	1.2123e-79	62.93	C:GO:0016020; C:GO:0016021	C:membrane; C:integral component of membrane			no GO terms	no GO terms
000001F|arrow.g585.t1	hypothetical protein ATETN484_0004050900	465	0	87.49	P:GO:0008150; F:GO:0003674; C:GO:0005575	P:biological_process; F:molecular_function; C:cellular_component			no GO terms	no GO terms
000001F|arrow.g586.t1	amino acid transporter	448	0	95.01	C:GO:0005575	C:cellular_component			no GO terms	no GO terms
000001F|arrow.g587.t1	predicted protein	512	0	54.79	P:GO:0005975; F:GO:0003674	P:carbohydrate metabolic process; F:molecular_function			F:GO:0005515	F:protein binding
000001F|arrow.g588.t1	glycosyl hydrolase family 92-domain-containing protein	821	0	84.47	P:GO:0005975; F:GO:0003674	P:carbohydrate metabolic process; F:molecular_function	EC:3	Hydrolases	P:GO:0005975; F:GO:0030246	P:carbohydrate metabolic process; F:carbohydrate binding
000001F|arrow.g589.t1	hypothetical protein ATETN484_0004050300	266	8.85943e-176	84.93					no GO terms	no GO terms
000001F|arrow.g590.t1	putative MFS sugar transporter	251	9.59119e-174	87.43					no GO terms	no GO terms
000001F|arrow.g591.t1	L-xylulose reductase	266	0	95.9	F:GO:0016491	F:oxidoreductase activity	EC:1	Oxidoreductases	F:GO:0016491	F:oxidoreductase activity
000001F|arrow.g592.t1	MFS general substrate transporter	562	0	92.47	F:GO:0022857; C:GO:0005575	F:transmembrane transporter activity; C:cellular_component	EC:7	Translocases	P:GO:0055085; F:GO:0022857	P:transmembrane transport; F:transmembrane transporter activity
000001F|arrow.g593.t1	hybrid NRPS/PKS enzyme, putative	1273	0	91.75	F:GO:0016491	F:oxidoreductase activity	EC:1	Oxidoreductases	F:GO:0016491	F:oxidoreductase activity
000001F|arrow.g594.t1	alpha/beta superfamily hydrolase	349	0	76.27	C:GO:0005575	C:cellular_component			no GO terms	no GO terms
000001F|arrow.g595.t1	predicted protein	436	0	80.26	F:GO:0022857; C:GO:0005886	F:transmembrane transporter activity; C:plasma membrane	EC:7	Translocases	P:GO:0006812; P:GO:0055085; F:GO:0015299; C:GO:0016021	P:cation transport; P:transmembrane transport; F:solute:proton antiporter activity; C:integral component of membrane
000001F|arrow.g596.t1	Na+/K+-exchanging ATPase alpha chain	1042	0	85.3	F:GO:0016887; F:GO:0043167; C:GO:0005575	F:ATPase activity; F:ion binding; C:cellular_component	EC:3.6.1; EC:3.6; EC:3; EC:3.6.1.15	Acting on acid anhydrides; Acting on acid anhydrides; Hydrolases; Nucleoside-triphosphate phosphatase	F:GO:0000166; F:GO:0005524; F:GO:0016887; C:GO:0016021	F:nucleotide binding; F:ATP binding; F:ATPase activity; C:integral component of membrane
000001F|arrow.g597.t1	predicted protein	240	4.53109e-151	80.31	P:GO:0006629	P:lipid metabolic process			no GO terms	no GO terms
000001F|arrow.g598.t1	hypothetical protein ATETN484_0004049400	255	5.56623e-156	79.36	P:GO:0009056; P:GO:0034641; F:GO:0003674	P:catabolic process; P:cellular nitrogen compound metabolic process; F:molecular_function	EC:3.1.1.14; EC:3.1; EC:3; EC:3.1.1; EC:3.1.1.1	Chlorophyllase; Acting on ester bonds; Hydrolases; Acting on ester bonds; Carboxylesterase	P:GO:0015996; F:GO:0047746	P:chlorophyll catabolic process; F:chlorophyllase activity
000001F|arrow.g599.t1	MFS transporter	543	0	88.95	F:GO:0022857; C:GO:0005886	F:transmembrane transporter activity; C:plasma membrane	EC:7	Translocases	P:GO:0055085; F:GO:0022857; C:GO:0016021	P:transmembrane transport; F:transmembrane transporter activity; C:integral component of membrane
000001F|arrow.g600.t1	carbohydrate binding domain protein	164	1.26627e-76	73.68	P:GO:0005975; F:GO:0016798	P:carbohydrate metabolic process; F:hydrolase activity, acting on glycosyl bonds	EC:3.2; EC:3	Glycosylases; Hydrolases	F:GO:0016798	F:hydrolase activity, acting on glycosyl bonds
000001F|arrow.g601.t1	putative MFS transporter	505	0	86.62	F:GO:0022857; C:GO:0005575	F:transmembrane transporter activity; C:cellular_component	EC:7	Translocases	P:GO:0055085; F:GO:0022857	P:transmembrane transport; F:transmembrane transporter activity
000001F|arrow.g602.t1	MFS maltose permease MalP	533	0	83.89	F:GO:0022857; C:GO:0005886	F:transmembrane transporter activity; C:plasma membrane	EC:7	Translocases	P:GO:0055085; F:GO:0022857; C:GO:0016020; C:GO:0016021	P:transmembrane transport; F:transmembrane transporter activity; C:membrane; C:integral component of membrane
000001F|arrow.g603.t1	nitronate monooxygenase	364	0	86.39	P:GO:0009058; P:GO:0034641; F:GO:0003677; F:GO:0003700; F:GO:0016491; F:GO:0043167	P:biosynthetic process; P:cellular nitrogen compound metabolic process; F:DNA binding; F:DNA-binding transcription factor activity; F:oxidoreductase activity; F:ion binding	EC:1.13; EC:1; EC:1.13.12.16; EC:1.13.12	Acting on single donors with incorporation of molecular oxygen (oxygenases). The oxygen incorporated need not be derived from O(2); Oxidoreductases; Nitronate monooxygenase; Acting on single donors with incorporation of molecular oxygen (oxygenases). The oxygen incorporated need not be derived from O(2)	F:GO:0003824; F:GO:0018580	F:catalytic activity; F:nitronate monooxygenase activity
000001F|arrow.g604.t1	bicyclomycin resistance protein	484	0	79.94	P:GO:0009058; P:GO:0034641; F:GO:0003677; F:GO:0003700; F:GO:0016491; F:GO:0043167; C:GO:0005575	P:biosynthetic process; P:cellular nitrogen compound metabolic process; F:DNA binding; F:DNA-binding transcription factor activity; F:oxidoreductase activity; F:ion binding; C:cellular_component	EC:1.13; EC:1; EC:1.13.12.16; EC:1.13.12	Acting on single donors with incorporation of molecular oxygen (oxygenases). The oxygen incorporated need not be derived from O(2); Oxidoreductases; Nitronate monooxygenase; Acting on single donors with incorporation of molecular oxygen (oxygenases). The oxygen incorporated need not be derived from O(2)	no GO terms	no GO terms
000001F|arrow.g605.t1	predicted protein	127	9.87711e-45	59.4	P:GO:0055114; F:GO:0016705	P:obsolete oxidation-reduction process; F:oxidoreductase activity, acting on paired donors, with incorporation or reduction of molecular oxygen			no IPS match	no IPS match
000001F|arrow.g606.t1	hypothetical protein ATETN484_0004048800	286	3.57586e-104	53.64	P:GO:0008150; F:GO:0003674; C:GO:0005575	P:biological_process; F:molecular_function; C:cellular_component			no GO terms	no GO terms
000001F|arrow.g607.t1	hypothetical protein BDV33DRAFT_187910	256	3.76733e-132	74.81	P:GO:0008150; F:GO:0003674; C:GO:0005575	P:biological_process; F:molecular_function; C:cellular_component			no IPS match	no IPS match
000001F|arrow.g608.t1	C6 zinc finger domain protein	78	1.32494e-06	60.32	P:GO:0006355; P:GO:0006357; F:GO:0000981; F:GO:0003677; F:GO:0008270; C:GO:0005634; C:GO:0016020; C:GO:0016021	P:regulation of transcription, DNA-templated; P:regulation of transcription by RNA polymerase II; F:DNA-binding transcription factor activity, RNA polymerase II-specific; F:DNA binding; F:zinc ion binding; C:nucleus; C:membrane; C:integral component of membrane			no GO terms	no GO terms
000001F|arrow.g609.t1	predicted protein	460	0	75.4	C:GO:0005575	C:cellular_component			no GO terms	no GO terms
000001F|arrow.g610.t1	predicted protein	389	0	92.5	P:GO:0005975	P:carbohydrate metabolic process			P:GO:0005975	P:carbohydrate metabolic process
000001F|arrow.g611.t1	predicted protein	90	3.11641e-30	68.91					no GO terms	no GO terms
000001F|arrow.g612.t1	alkaline-phosphatase-like protein	578	0	88.3	P:GO:0008150; F:GO:0003674	P:biological_process; F:molecular_function	EC:3.1.6; EC:3.1; EC:3; EC:3.1.6.1	Acting on ester bonds; Acting on ester bonds; Hydrolases; Arylsulfatase (type I)	P:GO:0018958; F:GO:0003824; F:GO:0004065; F:GO:0008484	P:phenol-containing compound metabolic process; F:catalytic activity; F:arylsulfatase activity; F:sulfuric ester hydrolase activity
000001F|arrow.g613.t1	uncharacterized N-acetyltransferase YoaA	218	6.55581e-121	82.06	F:GO:0016746	F:transferase activity, transferring acyl groups	EC:2.3; EC:2; EC:2.3.1	Acyltransferases; Transferases; Acyltransferases	F:GO:0008080	F:N-acetyltransferase activity
000001F|arrow.g614.t1	putative short-chain dehydrogenase	253	7.68927e-154	86.74	F:GO:0016491	F:oxidoreductase activity	EC:1	Oxidoreductases	F:GO:0016491	F:oxidoreductase activity
000001F|arrow.g615.t1	nucleoporin NUP49/NSP49 [Aspergillus nomiae NRRL 13137]	461	0	85.3	P:GO:0006913; P:GO:0015031; F:GO:0005198; C:GO:0005635; C:GO:0032991	P:nucleocytoplasmic transport; P:protein transport; F:structural molecule activity; C:nuclear envelope; C:protein-containing complex			P:GO:0006913; F:GO:0008139; F:GO:0017056; C:GO:0005643	P:nucleocytoplasmic transport; F:nuclear localization sequence binding; F:structural constituent of nuclear pore; C:nuclear pore
000001F|arrow.g616.t1	WD repeat-containing protein	965	0	87.54	F:GO:0003674	F:molecular_function			F:GO:0005515	F:protein binding
000001F|arrow.g617.t1	alpha-ketoglutarate-dependent taurine dioxygenase	398	0	93.21	F:GO:0016491	F:oxidoreductase activity	EC:1	Oxidoreductases	F:GO:0016491	F:oxidoreductase activity
000001F|arrow.g618.t1	10 kDa heat shock protein, mitochondrial	103	1.32828e-66	94.75	P:GO:0006457; P:GO:0006605; P:GO:0007005; P:GO:0055085; P:GO:0065003; F:GO:0016887; F:GO:0043167; F:GO:0051082; C:GO:0005739	P:protein folding; P:protein targeting; P:mitochondrion organization; P:transmembrane transport; P:protein-containing complex assembly; F:ATPase activity; F:ion binding; F:unfolded protein binding; C:mitochondrion	EC:3.6.1; EC:3.6; EC:3; EC:3.6.1.15	Acting on acid anhydrides; Acting on acid anhydrides; Hydrolases; Nucleoside-triphosphate phosphatase	P:GO:0006457; F:GO:0005524; F:GO:0016887	P:protein folding; F:ATP binding; F:ATPase activity
000001F|arrow.g619.t1	predicted protein	332	3.85543e-146	60.43	P:GO:0008150; F:GO:0003674; C:GO:0005575	P:biological_process; F:molecular_function; C:cellular_component			no GO terms	no GO terms
000001F|arrow.g620.t1	predicted protein	186	9.886e-98	75.84	C:GO:0005575	C:cellular_component			no GO terms	no GO terms
000001F|arrow.g621.t1	Ankyrin repeat protein	564	4.1662e-104	84.06	F:GO:0003674	F:molecular_function			F:GO:0005515	F:protein binding
000001F|arrow.g622.t1	ATP citrate lyase subunit	485	0	98.1	F:GO:0016746; F:GO:0016829; F:GO:0043167	F:transferase activity, transferring acyl groups; F:lyase activity; F:ion binding	EC:2.3.3; EC:2.3; EC:2; EC:4; EC:2.3.3.8	Acyltransferases; Acyltransferases; Transferases; Lyases; ATP citrate synthase	no GO terms	no GO terms
000001F|arrow.g623.t1	ATP-citrate synthase subunit 1	656	0	98.67	P:GO:0006629; F:GO:0016746; F:GO:0043167; C:GO:0005737	P:lipid metabolic process; F:transferase activity, transferring acyl groups; F:ion binding; C:cytoplasm	EC:2.3.3; EC:2.3; EC:2; EC:2.3.3.8	Acyltransferases; Acyltransferases; Transferases; ATP citrate synthase	F:GO:0003824; F:GO:0046912	F:catalytic activity; F:transferase activity, transferring acyl groups, acyl groups converted into alkyl on transfer
000001F|arrow.g624.t1	Rpp14/Pop5 family-domain-containing protein	212	2.20991e-98	78.54	P:GO:0006399; F:GO:0004518	P:tRNA metabolic process; F:nuclease activity	EC:3.1.30; EC:3.1; EC:3; EC:3.1.26; EC:3.1.26.5	Acting on ester bonds; Acting on ester bonds; Hydrolases; Acting on ester bonds; Ribonuclease P	P:GO:0008033	P:tRNA processing
000001F|arrow.g625.t1	GPN-loop GTPase 2 homolog	351	0	95.39	F:GO:0003924; F:GO:0043167	F:GTPase activity; F:ion binding	EC:3.6.1; EC:3.6; EC:3; EC:3.6.1.15	Acting on acid anhydrides; Acting on acid anhydrides; Hydrolases; Nucleoside-triphosphate phosphatase	no GO terms	no GO terms
000001F|arrow.g626.t1	nuclear pore complex subunit	354	0	96.44	F:GO:0003674	F:molecular_function			F:GO:0005515	F:protein binding
000001F|arrow.g627.t1	ribose 5-phosphate isomerase	277	0	92.92	P:GO:0006091; F:GO:0016853	P:generation of precursor metabolites and energy; F:isomerase activity	EC:5.3; EC:5; EC:5.3.1; EC:5.3.1.6	Intramolecular oxidoreductases; Isomerases; Intramolecular oxidoreductases; Ribose-5-phosphate isomerase	P:GO:0009052; F:GO:0004751	P:pentose-phosphate shunt, non-oxidative branch; F:ribose-5-phosphate isomerase activity
000001F|arrow.g628.t1	ubiquitin-like activating enzyme (UlaA)	557	0	91.43	P:GO:0006464; F:GO:0016874	P:cellular protein modification process; F:ligase activity	EC:6.2; EC:6	Forming carbon-sulfur bonds; Ligases	P:GO:0045116; F:GO:0008641; F:GO:0019781	P:protein neddylation; F:ubiquitin-like modifier activating enzyme activity; F:NEDD8 activating enzyme activity
000001F|arrow.g629.t1	ubiquitin-protein ligase (Asi3)	960	0	86.27	F:GO:0016874; C:GO:0005575	F:ligase activity; C:cellular_component	EC:6	Ligases	no GO terms	no GO terms
000001F|arrow.g630.t1	predicted protein	192	1.78069e-38	65.51					no GO terms	no GO terms
000001F|arrow.g631.t1	predicted protein	315	7.56675e-180	83.21	P:GO:0009058; P:GO:0034641; F:GO:0003677; F:GO:0003700; F:GO:0043167; C:GO:0005575	P:biosynthetic process; P:cellular nitrogen compound metabolic process; F:DNA binding; F:DNA-binding transcription factor activity; F:ion binding; C:cellular_component			no GO terms	no GO terms
000001F|arrow.g632.t1	CFEM-domain-containing protein	201	1.46396e-64	61.92	C:GO:0005576; C:GO:0005618; C:GO:0005886	C:extracellular region; C:cell wall; C:plasma membrane			no GO terms	no GO terms
000001F|arrow.g633.t1	DNA polymerase delta subunit 4	195	4.8594e-122	84.71	P:GO:0006259; P:GO:0006950; P:GO:0009058; F:GO:0016779; F:GO:0016853	P:DNA metabolic process; P:response to stress; P:biosynthetic process; F:nucleotidyltransferase activity; F:isomerase activity	EC:2.7; EC:2; EC:5; EC:2.7.7.7; EC:2.7.7	Transferring phosphorus-containing groups; Transferases; Isomerases; DNA-directed DNA polymerase; Transferring phosphorus-containing groups	P:GO:0000731; P:GO:0006260	P:DNA synthesis involved in DNA repair; P:DNA replication
000001F|arrow.g634.t1	arrestin domain protein	401	0	98.36					no GO terms	no GO terms
000001F|arrow.g635.t1	hypothetical protein ATETN484_0004046000	75	5.75491e-33	76.75					no IPS match	no IPS match
000001F|arrow.g636.t1	tRNA-splicing endonuclease subunit sen54 N-term-domain-containing protein	440	0	80.88	P:GO:0006399	P:tRNA metabolic process			no GO terms	no GO terms
000001F|arrow.g637.t1	putative transcriptional elongation regulator Elc1/Elongin C	102	1.48448e-63	96.51	P:GO:0009056	P:catabolic process			P:GO:0006511	P:ubiquitin-dependent protein catabolic process
000001F|arrow.g638.t1	3-oxoacyl-acyl carrier protein reductase	334	2.2175e-155	79.97	F:GO:0016491	F:oxidoreductase activity	EC:1	Oxidoreductases	F:GO:0016491	F:oxidoreductase activity
000001F|arrow.g639.t1	ubiquitin-activating enzyme E1-like protein	630	0	87.32	P:GO:0006464; F:GO:0016874; F:GO:0043167; C:GO:0005634; C:GO:0032991	P:cellular protein modification process; F:ligase activity; F:ion binding; C:nucleus; C:protein-containing complex	EC:6.2; EC:6	Forming carbon-sulfur bonds; Ligases	P:GO:0016925; F:GO:0008641; F:GO:0019948	P:protein sumoylation; F:ubiquitin-like modifier activating enzyme activity; F:SUMO activating enzyme activity
000001F|arrow.g640.t1	UPF0553 protein c	416	0	88.25					no GO terms	no GO terms
000001F|arrow.g641.t1	origin recognition complex, subunit 6	443	0	84.41	P:GO:0009058; F:GO:0003677; C:GO:0000228; C:GO:0032991	P:biosynthetic process; F:DNA binding; C:nuclear chromosome; C:protein-containing complex			P:GO:0006260; F:GO:0003677; C:GO:0005664	P:DNA replication; F:DNA binding; C:nuclear origin of replication recognition complex
000001F|arrow.g642.t1	cyclophilin-like domain-containing protein	213	9.01841e-154	95.63	P:GO:0006457; P:GO:0006464; F:GO:0016853	P:protein folding; P:cellular protein modification process; F:isomerase activity	EC:5.2.1.8; EC:5.2; EC:5	Peptidylprolyl isomerase; Cis-trans-isomerases; Isomerases	P:GO:0000413; P:GO:0006457; F:GO:0003755	P:protein peptidyl-prolyl isomerization; P:protein folding; F:peptidyl-prolyl cis-trans isomerase activity
000001F|arrow.g643.t1	ZPR1 zinc-finger domain-containing protein	461	0	93.92	F:GO:0043167	F:ion binding			F:GO:0008270	F:zinc ion binding
000001F|arrow.g644.t1	fungal-specific transcription factor	678	0	80.03	P:GO:0009058; P:GO:0034641; F:GO:0003677; F:GO:0003700; F:GO:0043167	P:biosynthetic process; P:cellular nitrogen compound metabolic process; F:DNA binding; F:DNA-binding transcription factor activity; F:ion binding			P:GO:0006351; P:GO:0006355; F:GO:0000981; F:GO:0003677; F:GO:0008270	P:transcription, DNA-templated; P:regulation of transcription, DNA-templated; F:DNA-binding transcription factor activity, RNA polymerase II-specific; F:DNA binding; F:zinc ion binding
000001F|arrow.g645.t1	protein required for cell viability	849	0	84.45					no GO terms	no GO terms
000001F|arrow.g646.t1	RNA lariat debranching enzyme	705	0	78.32	P:GO:0006397; F:GO:0003674	P:mRNA processing; F:molecular_function	EC:3.1; EC:3	Acting on ester bonds; Hydrolases	P:GO:0006397; F:GO:0016787; F:GO:0016788	P:mRNA processing; F:hydrolase activity; F:hydrolase activity, acting on ester bonds
000001F|arrow.g647.t1	cullin binding protein CanA	128	1.05619e-33	52.42					no GO terms	no GO terms
000001F|arrow.g648.t1	cullin-associated NEDD8-dissociated protein 1, C-terminal part	1035	0	95.35	P:GO:0065003	P:protein-containing complex assembly			P:GO:0010265	P:SCF complex assembly
000001F|arrow.g649.t1	predicted protein	580	0	75.27	P:GO:0009058; P:GO:0034641; F:GO:0003677; F:GO:0043167	P:biosynthetic process; P:cellular nitrogen compound metabolic process; F:DNA binding; F:ion binding			P:GO:0006351; F:GO:0003677; F:GO:0008270	P:transcription, DNA-templated; F:DNA binding; F:zinc ion binding
000001F|arrow.g650.t1	Riboflavin transporter MCH5	451	0	85.11	F:GO:0022857; C:GO:0005575	F:transmembrane transporter activity; C:cellular_component	EC:7	Translocases	P:GO:0055085; F:GO:0022857	P:transmembrane transport; F:transmembrane transporter activity
000001F|arrow.g651.t1	leucine rich repeat 4	1795	0	77.23	F:GO:0003674	F:molecular_function	EC:3	Hydrolases	F:GO:0005515	F:protein binding
000001F|arrow.g652.t1	predicted protein	694	0	62.74					no GO terms	no GO terms
000001F|arrow.g653.t1	vacuolar protein sorting protein	1568	0	81.94	P:GO:0015031; P:GO:0016192; F:GO:0043167; C:GO:0005768; C:GO:0032991	P:protein transport; P:vesicle-mediated transport; F:ion binding; C:endosome; C:protein-containing complex	EC:2	Transferases	P:GO:0006886; P:GO:0016192; F:GO:0005515	P:intracellular protein transport; P:vesicle-mediated transport; F:protein binding
000001F|arrow.g654.t1	TIP120 protein	630	0	88.69	P:GO:0005975; P:GO:0065003; F:GO:0016810; C:GO:0005575	P:carbohydrate metabolic process; P:protein-containing complex assembly; F:hydrolase activity, acting on carbon-nitrogen (but not peptide) bonds; C:cellular_component	EC:3.5; EC:3	Acting on carbon-nitrogen bonds, other than peptide bonds; Hydrolases	P:GO:0005975; F:GO:0003824; F:GO:0016810	P:carbohydrate metabolic process; F:catalytic activity; F:hydrolase activity, acting on carbon-nitrogen (but not peptide) bonds
000001F|arrow.g655.t1	demethylmenaquinone methyltransferase	222	8.59264e-112	80.37	P:GO:0008150; F:GO:0008168	P:biological_process; F:methyltransferase activity	EC:2.1; EC:2; EC:2.1.1	Transferring one-carbon groups; Transferases; Transferring one-carbon groups	F:GO:0008168	F:methyltransferase activity
000001F|arrow.g656.t1	predicted protein	160	2.55271e-84	67.41	P:GO:0008150; F:GO:0003674; C:GO:0005575	P:biological_process; F:molecular_function; C:cellular_component			no GO terms	no GO terms
000001F|arrow.g657.t1	ceramide synthase membrane component	440	0	91.47	C:GO:0005575	C:cellular_component			C:GO:0016021	C:integral component of membrane
000001F|arrow.g658.t1	sugar transporter	534	0	92.24	F:GO:0022857; C:GO:0005886	F:transmembrane transporter activity; C:plasma membrane	EC:7	Translocases	P:GO:0055085; F:GO:0022857; C:GO:0016020; C:GO:0016021	P:transmembrane transport; F:transmembrane transporter activity; C:membrane; C:integral component of membrane
000001F|arrow.g659.t1	kyphoscoliosis peptidase	674	0	78.69					no GO terms	no GO terms
000001F|arrow.g660.t1	C6 transcription factor	692	0	86.72	P:GO:0009058; P:GO:0034641; F:GO:0003677; F:GO:0003700; F:GO:0016810; F:GO:0043167	P:biosynthetic process; P:cellular nitrogen compound metabolic process; F:DNA binding; F:DNA-binding transcription factor activity; F:hydrolase activity, acting on carbon-nitrogen (but not peptide) bonds; F:ion binding	EC:3.5; EC:3	Acting on carbon-nitrogen bonds, other than peptide bonds; Hydrolases	P:GO:0006351; P:GO:0006355; F:GO:0000981; F:GO:0003677; F:GO:0008270	P:transcription, DNA-templated; P:regulation of transcription, DNA-templated; F:DNA-binding transcription factor activity, RNA polymerase II-specific; F:DNA binding; F:zinc ion binding
000001F|arrow.g661.t1	guanine deaminase	457	0	82.33	P:GO:0009056; P:GO:0009058; P:GO:0034641; P:GO:0044281; F:GO:0003677; F:GO:0003700; F:GO:0016810; F:GO:0043167	P:catabolic process; P:biosynthetic process; P:cellular nitrogen compound metabolic process; P:small molecule metabolic process; F:DNA binding; F:DNA-binding transcription factor activity; F:hydrolase activity, acting on carbon-nitrogen (but not peptide) bonds; F:ion binding	EC:3.5.4; EC:3.5; EC:3; EC:3.5.4.3	Acting on carbon-nitrogen bonds, other than peptide bonds; Acting on carbon-nitrogen bonds, other than peptide bonds; Hydrolases; Guanine deaminase	P:GO:0006147; F:GO:0008270; F:GO:0008892; F:GO:0016787; F:GO:0016810	P:guanine catabolic process; F:zinc ion binding; F:guanine deaminase activity; F:hydrolase activity; F:hydrolase activity, acting on carbon-nitrogen (but not peptide) bonds
000001F|arrow.g662.t1	bacteriocin-protection, YdeI or OmpD-associated-domain-containing protein	217	1.01775e-85	70.99					no GO terms	no GO terms
000001F|arrow.g663.t1	uncharacterized protein IFM58399_00585	157	2.78536e-64	66.96					no GO terms	no GO terms
000001F|arrow.g664.t1	OPT oligopeptide transporter protein-domain-containing protein	759	0	90.74	P:GO:0015031; P:GO:0055085; C:GO:0005575	P:protein transport; P:transmembrane transport; C:cellular_component			P:GO:0055085	P:transmembrane transport
000001F|arrow.g665.t1	D-amino-acid oxidase	352	0	87.34	P:GO:0006520; F:GO:0016491; F:GO:0043167; C:GO:0005575	P:cellular amino acid metabolic process; F:oxidoreductase activity; F:ion binding; C:cellular_component	EC:1.4; EC:1.4.3; EC:1; EC:1.4.3.3	Acting on the CH-NH(2) group of donors; Acting on the CH-NH(2) group of donors; Oxidoreductases; D-amino-acid oxidase	P:GO:0046416; F:GO:0003884; F:GO:0016491; F:GO:0071949	P:D-amino acid metabolic process; F:D-amino-acid oxidase activity; F:oxidoreductase activity; F:FAD binding
000001F|arrow.g666.t1	two-component system protein A	699	0	82.37	P:GO:0007165; P:GO:0009058; P:GO:0034641; F:GO:0016301	P:signal transduction; P:biosynthetic process; P:cellular nitrogen compound metabolic process; F:kinase activity	EC:2.7.1; EC:2.7; EC:2.7.3; EC:2; EC:2.7.13.3	Transferring phosphorus-containing groups; Transferring phosphorus-containing groups; Transferring phosphorus-containing groups; Transferases; Histidine kinase	P:GO:0000160; P:GO:0007165; P:GO:0016310; F:GO:0000155; F:GO:0016772	P:phosphorelay signal transduction system; P:signal transduction; P:phosphorylation; F:phosphorelay sensor kinase activity; F:transferase activity, transferring phosphorus-containing groups
000001F|arrow.g667.t1	peptidase S8/S53 domain-containing protein	645	0	87.07	F:GO:0008233; F:GO:0043167; C:GO:0005615	F:peptidase activity; F:ion binding; C:extracellular space	EC:3.4.21.73; EC:3.4.24.7; EC:3.4.21.71; EC:3.4.24.3; EC:3.4.21.34; EC:3.4.21.78; EC:3.4.21.75; EC:3.4.21.26; EC:3.4.21.27; EC:3.4.21.68; EC:3.4.21.69; EC:3.4.24.34; EC:3.4.21.41; EC:3.4.21.83; EC:3.4.21.88; EC:3.4.21.45; EC:3.4.21.89; EC:3.4.21.42; EC:3.4.19.1; EC:3.4.21.43; EC:3.4.21.87; EC:3.4.21.38; EC:3.4.21.35; EC:3.4.21.79; EC:3.4.21.36; EC:3.4.21.102; EC:3.4.21.39; EC:3.4.21; EC:3.4.21.4;…	U-plasminogen activator; Interstitial collagenase; Pancreatic elastase II; Microbial collagenase; Plasma kallikrein; Granzyme A; Furin; Prolyl oligopeptidase; Coagulation factor XIa; T-plasminogen activator; Protein C (activated); Neutrophil collagenase; Complement subcomponent C1r; Oligopeptidase B; Repressor LexA; Complement factor I; Signal peptidase I; Complement subcomponent C1s; Acylaminoac…	P:GO:0006508; F:GO:0004252; F:GO:0008236	P:proteolysis; F:serine-type endopeptidase activity; F:serine-type peptidase activity
000001F|arrow.g668.t1	putative Spore-associated protein A	145	2.29368e-63	78.4					no GO terms	no GO terms
000001F|arrow.g669.t1	predicted protein	196	2.79143e-36	64.23					no GO terms	no GO terms
000001F|arrow.g670.t1	uncharacterized alpha/beta hydrolase domain DUF2235	513	0	81.83	P:GO:0008150; F:GO:0003674; C:GO:0005575	P:biological_process; F:molecular_function; C:cellular_component			no GO terms	no GO terms
000001F|arrow.g671.t1	fatty acid hydroxylase superfamily	349	0	87.92	P:GO:0006629; P:GO:0009058; F:GO:0016491; F:GO:0043167; C:GO:0005575	P:lipid metabolic process; P:biosynthetic process; F:oxidoreductase activity; F:ion binding; C:cellular_component	EC:1	Oxidoreductases	P:GO:0008610; F:GO:0005506; F:GO:0016491	P:lipid biosynthetic process; F:iron ion binding; F:oxidoreductase activity
000001F|arrow.g672.t1	emopamil binding protein	230	1.32841e-136	88.26	P:GO:0006629; F:GO:0016853; C:GO:0005783	P:lipid metabolic process; F:isomerase activity; C:endoplasmic reticulum	EC:5.3; EC:5; EC:5.3.3.5; EC:5.3.3	Intramolecular oxidoreductases; Isomerases; Cholestenol Delta-isomerase; Intramolecular oxidoreductases	P:GO:0016125; F:GO:0047750; C:GO:0016021	P:sterol metabolic process; F:cholestenol delta-isomerase activity; C:integral component of membrane
000001F|arrow.g673.t1	NAD(P)-binding protein	329	6.43449e-96	73.63	F:GO:0016491	F:oxidoreductase activity	EC:1	Oxidoreductases	F:GO:0016491	F:oxidoreductase activity
000001F|arrow.g674.t1	aldehyde reductase 1	334	0	92.68	F:GO:0016491	F:oxidoreductase activity	EC:1.1; EC:1; EC:1.1.1; EC:1.1.1.122	Acting on the CH-OH group of donors; Oxidoreductases; Acting on the CH-OH group of donors; D-threo-aldose 1-dehydrogenase	F:GO:0016491; F:GO:0047834	F:oxidoreductase activity; F:D-threo-aldose 1-dehydrogenase activity
000001F|arrow.g675.t1	predicted protein	441	0	74.97	P:GO:0009058; F:GO:0043167	P:biosynthetic process; F:ion binding			P:GO:0009058; F:GO:0003824; F:GO:0030170	P:biosynthetic process; F:catalytic activity; F:pyridoxal phosphate binding
000001F|arrow.g676.t1	trascription factor	155	7.12888e-48	73.24	P:GO:0009058; P:GO:0034641; F:GO:0003677; F:GO:0003700; F:GO:0043167	P:biosynthetic process; P:cellular nitrogen compound metabolic process; F:DNA binding; F:DNA-binding transcription factor activity; F:ion binding			no GO terms	no GO terms
000001F|arrow.g677.t1	hypothetical protein ATETN484_0004060400	323	0	83.73					no GO terms	no GO terms
000001F|arrow.g678.t1	major facilitator superfamily transporter	223	1.11185e-34	70.26	P:GO:0055085; F:GO:0022857; C:GO:0016020; C:GO:0016021	P:transmembrane transport; F:transmembrane transporter activity; C:membrane; C:integral component of membrane			no GO terms	no GO terms
000001F|arrow.g679.t1	E1-E2 ATPase-domain-containing protein	1123	0	78.68	F:GO:0016887; F:GO:0022857; F:GO:0043167; C:GO:0005575	F:ATPase activity; F:transmembrane transporter activity; F:ion binding; C:cellular_component	EC:3.6.1; EC:3.6; EC:3; EC:7; EC:3.6.1.15	Acting on acid anhydrides; Acting on acid anhydrides; Hydrolases; Translocases; Nucleoside-triphosphate phosphatase	P:GO:0006812; F:GO:0000166; F:GO:0005524; F:GO:0016887; F:GO:0019829; F:GO:0046872; C:GO:0016021	P:cation transport; F:nucleotide binding; F:ATP binding; F:ATPase activity; F:ATPase-coupled cation transmembrane transporter activity; F:metal ion binding; C:integral component of membrane
000001F|arrow.g680.t1	cell wall mannoprotein PST1	425	0	61.57	C:GO:0005575	C:cellular_component			no GO terms	no GO terms
000001F|arrow.g681.t1	RNA binding protein	395	0	68.87	F:GO:0003723	F:RNA binding			F:GO:0003676	F:nucleic acid binding
000001F|arrow.g682.t1	cell division control protein 16	451	0	90.68	P:GO:0051301	P:cell division			no GO terms	no GO terms
000001F|arrow.g683.t1	calmodulin [Aspergillus nomiae NRRL 13137]	293	0	86.97	F:GO:0043167	F:ion binding			F:GO:0005509	F:calcium ion binding
000001F|arrow.g684.t1	protein mesA	780	0	89.3					no GO terms	no GO terms
000001F|arrow.g685.t1	MFS general substrate transporter	487	0	76.43	F:GO:0022857; C:GO:0005575	F:transmembrane transporter activity; C:cellular_component	EC:7	Translocases	P:GO:0055085; F:GO:0022857	P:transmembrane transport; F:transmembrane transporter activity
000001F|arrow.g686.t1	AMP-dependent synthetase/ligase	866	0	72.26	F:GO:0016874	F:ligase activity			no GO terms	no GO terms
000001F|arrow.g687.t1	cytochrome P450	549	0	81.2	F:GO:0016491; F:GO:0043167; C:GO:0005575	F:oxidoreductase activity; F:ion binding; C:cellular_component	EC:1; EC:1.14	Oxidoreductases; Acting on paired donors, with incorporation or reduction of molecular oxygen. The oxygen incorporated need not be derived from O(2)	F:GO:0004497; F:GO:0005506; F:GO:0016705; F:GO:0020037	F:monooxygenase activity; F:iron ion binding; F:oxidoreductase activity, acting on paired donors, with incorporation or reduction of molecular oxygen; F:heme binding
000001F|arrow.g688.t1	APH-domain-containing protein	363	0	82.23	F:GO:0003674	F:molecular_function	EC:2	Transferases	no GO terms	no GO terms
000001F|arrow.g689.t1	alpha/beta-hydrolase	442	0	72.97	F:GO:0016787	F:hydrolase activity			no GO terms	no GO terms
000001F|arrow.g690.t1	peroxisomal D3,D2-enoyl-CoA isomerase	275	1.56236e-123	78.81	F:GO:0016853	F:isomerase activity	EC:5.3; EC:5; EC:5.3.3.8; EC:5.3.3	Intramolecular oxidoreductases; Isomerases; Delta(3)-Delta(2)-enoyl-CoA isomerase; Intramolecular oxidoreductases	F:GO:0003824	F:catalytic activity
000001F|arrow.g691.t1	hypothetical protein ATETN484_0004061500	354	0	69.66					no GO terms	no GO terms
000001F|arrow.g692.t1	hypothetical protein ATETN484_0004061600	119	7.59444e-63	63.61					no GO terms	no GO terms
000001F|arrow.g693.t1	26S proteasome non-ATPase regulatory subunit 10	769	0	72.96	F:GO:0003674	F:molecular_function			F:GO:0005515	F:protein binding
000001F|arrow.g694.t1	pyridoxine kinase	179	2.61699e-37	61.36	P:GO:0009443; P:GO:0016310; F:GO:0008478	P:pyridoxal 5'-phosphate salvage; P:phosphorylation; F:pyridoxal kinase activity			no GO terms	no GO terms
000001F|arrow.g695.t1	pyridoxine kinase	370	0	89.59	P:GO:0009058; P:GO:0034641; P:GO:0044281; F:GO:0016301	P:biosynthetic process; P:cellular nitrogen compound metabolic process; P:small molecule metabolic process; F:kinase activity	EC:2.7.1; EC:2.7; EC:2; EC:2.7.1.35	Transferring phosphorus-containing groups; Transferring phosphorus-containing groups; Transferases; Pyridoxal kinase	P:GO:0009443; F:GO:0008478	P:pyridoxal 5'-phosphate salvage; F:pyridoxal kinase activity
000001F|arrow.g696.t1	dUTPase (Dut), putaive	221	4.32363e-102	81.54	P:GO:0009058; P:GO:0034655; P:GO:0044281; F:GO:0043167	P:biosynthetic process; P:nucleobase-containing compound catabolic process; P:small molecule metabolic process; F:ion binding	EC:3.6.1.23; EC:3.6.1; EC:3.6; EC:3; EC:3.6.1.9	dUTP diphosphatase; Acting on acid anhydrides; Acting on acid anhydrides; Hydrolases; Nucleotide diphosphatase	P:GO:0006226; P:GO:0046081; F:GO:0000287; F:GO:0004170	P:dUMP biosynthetic process; P:dUTP catabolic process; F:magnesium ion binding; F:dUTP diphosphatase activity
000001F|arrow.g697.t1	phosphotransferase enzyme family domain protein	362	0	91.74	F:GO:0003674	F:molecular_function	EC:2	Transferases	no GO terms	no GO terms
000001F|arrow.g698.t1	C2H2 finger domain transcription factor	510	0	70.84					no GO terms	no GO terms
000001F|arrow.g699.t1	C2H2 type zinc finger domain protein	361	0	74.32					no GO terms	no GO terms
000001F|arrow.g700.t1	L-cystine transporter	290	0	87.67	C:GO:0005575	C:cellular_component			no GO terms	no GO terms
000001F|arrow.g701.t1	predicted protein	744	0	86.84	P:GO:0007049; P:GO:0051301; C:GO:0000228; C:GO:0032991	P:cell cycle; P:cell division; C:nuclear chromosome; C:protein-containing complex			C:GO:0000818	C:nuclear MIS12/MIND complex
000001F|arrow.g702.t1	ATP synthase	165	1.44963e-113	98	P:GO:0009058; P:GO:0034641; P:GO:0044281; F:GO:0016874; F:GO:0022857; C:GO:0005622; C:GO:0032991	P:biosynthetic process; P:cellular nitrogen compound metabolic process; P:small molecule metabolic process; F:ligase activity; F:transmembrane transporter activity; C:intracellular anatomical structure; C:protein-containing complex	EC:7.1.2.2; EC:6; EC:7	H(+)-transporting two-sector ATPase; Ligases; Translocases	P:GO:0015986; F:GO:0046933; C:GO:0045261	P:ATP synthesis coupled proton transport; F:proton-transporting ATP synthase activity, rotational mechanism; C:proton-transporting ATP synthase complex, catalytic core F(1)
000001F|arrow.g703.t1	predicted protein	491	0	82.04	F:GO:0003674	F:molecular_function			F:GO:0005515	F:protein binding
000001F|arrow.g704.t1	PCI domain family protein	458	0	86.28	F:GO:0003729; F:GO:0022857; C:GO:0005886	F:mRNA binding; F:transmembrane transporter activity; C:plasma membrane	EC:7	Translocases	F:GO:0000340; F:GO:0003729	F:RNA 7-methylguanosine cap binding; F:mRNA binding
000001F|arrow.g705.t1	general substrate transporter	541	0	88.54	F:GO:0003729; F:GO:0022857; C:GO:0005886	F:mRNA binding; F:transmembrane transporter activity; C:plasma membrane	EC:7	Translocases	P:GO:0055085; F:GO:0022857; C:GO:0016020; C:GO:0016021	P:transmembrane transport; F:transmembrane transporter activity; C:membrane; C:integral component of membrane
000001F|arrow.g706.t1	putative glycosyl hydrolase	654	0	95.15	P:GO:0005975; F:GO:0016798	P:carbohydrate metabolic process; F:hydrolase activity, acting on glycosyl bonds	EC:3.2; EC:3; EC:3.2.1	Glycosylases; Hydrolases; Glycosylases	P:GO:0005975; F:GO:0003824; F:GO:0004553; F:GO:0030246	P:carbohydrate metabolic process; F:catalytic activity; F:hydrolase activity, hydrolyzing O-glycosyl compounds; F:carbohydrate binding
000001F|arrow.g707.t1	MYB family conidiophore development protein FlbD	315	0	85.97	F:GO:0003677	F:DNA binding			no GO terms	no GO terms
000001F|arrow.g708.t1	short-chain dehydrogenase/reductase	314	0	83.99	F:GO:0016491	F:oxidoreductase activity	EC:1	Oxidoreductases	F:GO:0016491	F:oxidoreductase activity
000001F|arrow.g709.t1	predicted protein	411	0	87.23	F:GO:0022857; C:GO:0005575	F:transmembrane transporter activity; C:cellular_component	EC:7	Translocases	P:GO:0055085; F:GO:0022857	P:transmembrane transport; F:transmembrane transporter activity
000001F|arrow.g710.t1	tetratricopeptide repeat domain protein	569	0	92.13	F:GO:0003674	F:molecular_function			F:GO:0005515	F:protein binding
000001F|arrow.g711.t1	TPR domain protein	566	0	92.14	F:GO:0003674	F:molecular_function	EC:3	Hydrolases	F:GO:0005515	F:protein binding
000001F|arrow.g712.t1	hypothetical protein ASPCAL09074	210	1.12162e-75	73.68	C:GO:0005575	C:cellular_component			no GO terms	no GO terms
000001F|arrow.g713.t1	Zn(II)2Cys6 transcription factor	1030	0	63.94	P:GO:0009058; P:GO:0034641; F:GO:0003677; F:GO:0003700; F:GO:0043167	P:biosynthetic process; P:cellular nitrogen compound metabolic process; F:DNA binding; F:DNA-binding transcription factor activity; F:ion binding			P:GO:0006351; F:GO:0003677; F:GO:0008270	P:transcription, DNA-templated; F:DNA binding; F:zinc ion binding
000001F|arrow.g714.t1	glycosyl transferase family 41-domain-containing protein	1641	0	86.31	F:GO:0016757	F:transferase activity, transferring glycosyl groups	EC:2.4; EC:2	Glycosyltransferases; Transferases	F:GO:0005515	F:protein binding
000001F|arrow.g715.t1	60S ribosomal protein L12	165	3.97081e-114	98.91	P:GO:0006412; F:GO:0003735; C:GO:0005840	P:translation; F:structural constituent of ribosome; C:ribosome			P:GO:0006412; F:GO:0003735; C:GO:0005840	P:translation; F:structural constituent of ribosome; C:ribosome
000001F|arrow.g716.t1	transport protein SEC23	771	0	96.38	P:GO:0015031; P:GO:0016192; P:GO:0061024; F:GO:0043167; C:GO:0005783; C:GO:0005794; C:GO:0031410; C:GO:0032991	P:protein transport; P:vesicle-mediated transport; P:membrane organization; F:ion binding; C:endoplasmic reticulum; C:Golgi apparatus; C:cytoplasmic vesicle; C:protein-containing complex			P:GO:0006886; P:GO:0006888; P:GO:0090114; F:GO:0008270; C:GO:0030127	P:intracellular protein transport; P:endoplasmic reticulum to Golgi vesicle-mediated transport; P:COPII-coated vesicle budding; F:zinc ion binding; C:COPII vesicle coat
000001F|arrow.g717.t1	eukaryotic and archaeal DNA primase, large subunit-domain-containing protein	500	0	96.8	P:GO:0006259; P:GO:0009058; F:GO:0003677; F:GO:0043167	P:DNA metabolic process; P:biosynthetic process; F:DNA binding; F:ion binding			P:GO:0006269	P:DNA replication, synthesis of RNA primer
000001F|arrow.g718.t1	adenylate kinase 2	234	6.44163e-169	96.32	P:GO:0009058; P:GO:0034641; P:GO:0044281; F:GO:0016301; F:GO:0043167; C:GO:0005739	P:biosynthetic process; P:cellular nitrogen compound metabolic process; P:small molecule metabolic process; F:kinase activity; F:ion binding; C:mitochondrion	EC:2.7.4.4; EC:2.7.4.3; EC:2.7; EC:2; EC:2.7.4; EC:2.7.4.10	Nucleoside-phosphate kinase; Adenylate kinase; Transferring phosphorus-containing groups; Transferases; Transferring phosphorus-containing groups; Nucleoside-triphosphate--adenylate kinase	P:GO:0006139; F:GO:0004017; F:GO:0005524; F:GO:0016776; F:GO:0019205; C:GO:0005739	P:nucleobase-containing compound metabolic process; F:adenylate kinase activity; F:ATP binding; F:phosphotransferase activity, phosphate group as acceptor; F:nucleobase-containing compound kinase activity; C:mitochondrion
000001F|arrow.g719.t1	RecName: Full=Probable endonuclease lcl3	299	0	85	F:GO:0004518; F:GO:0043167; C:GO:0005575	F:nuclease activity; F:ion binding; C:cellular_component	EC:3.1; EC:3	Acting on ester bonds; Hydrolases	no GO terms	no GO terms
000001F|arrow.g720.t1	mitochondrial carrier domain-containing protein	335	0	94.9	F:GO:0022857; C:GO:0005739	F:transmembrane transporter activity; C:mitochondrion	EC:7	Translocases	P:GO:0055085	P:transmembrane transport
000001F|arrow.g721.t1	calpain-like protease palB/RIM13	840	0	89.2	F:GO:0008233	F:peptidase activity	EC:3.4.22; EC:3.4.22.1; EC:3.4.99; EC:3.4.22.41; EC:3.4.22.40; EC:3.4.22.34; EC:3.4.22.8; EC:3.4.22.28; EC:3.4.22.16; EC:3.4.22.27; EC:3.4.22.38; EC:3.4.22.15; EC:3.4.22.14; EC:3.4; EC:3	Acting on peptide bonds (peptidases); Cathepsin B; Acting on peptide bonds (peptidases); Cathepsin F; Bleomycin hydrolase; Legumain; Clostripain; Picornain 3C; Cathepsin H; Cathepsin S; Cathepsin K; Cathepsin L; Actinidain; Acting on peptide bonds (peptidases); Hydrolases	P:GO:0006508; F:GO:0004198	P:proteolysis; F:calcium-dependent cysteine-type endopeptidase activity
000001F|arrow.g722.t1	Vta1 like-domain-containing protein	415	0	77.41	P:GO:0007034; P:GO:0015031; P:GO:0016192; C:GO:0005768	P:vacuolar transport; P:protein transport; P:vesicle-mediated transport; C:endosome			P:GO:0032511	P:late endosome to vacuole transport via multivesicular body sorting pathway
000001F|arrow.g723.t1	predicted protein	393	0	56.38					no GO terms	no GO terms
000001F|arrow.g724.t1	epimerase/dehydratase family protein	374	0	94.59	F:GO:0003674	F:molecular_function			F:GO:0003824	F:catalytic activity
000001F|arrow.g725.t1	predicted protein	521	0	52.23					no GO terms	no GO terms
000001F|arrow.g726.t1	ATP synthase subunit gamma	290	0	96.72	P:GO:0009058; P:GO:0034641; P:GO:0044281; F:GO:0016874; F:GO:0022857; C:GO:0005622; C:GO:0032991	P:biosynthetic process; P:cellular nitrogen compound metabolic process; P:small molecule metabolic process; F:ligase activity; F:transmembrane transporter activity; C:intracellular anatomical structure; C:protein-containing complex	EC:7.1.2.2; EC:6; EC:7	H(+)-transporting two-sector ATPase; Ligases; Translocases	P:GO:0015986; F:GO:0046933; C:GO:0045261	P:ATP synthesis coupled proton transport; F:proton-transporting ATP synthase activity, rotational mechanism; C:proton-transporting ATP synthase complex, catalytic core F(1)
000001F|arrow.g727.t1	topoisomerase I	848	0	93.13	P:GO:0006259; P:GO:0051276; F:GO:0003677; F:GO:0016853; C:GO:0005694	P:DNA metabolic process; P:chromosome organization; F:DNA binding; F:isomerase activity; C:chromosome	EC:5.6.2.1; EC:5; EC:5.6.2	DNA topoisomerase; Isomerases; Isomerases altering macromolecular conformation	P:GO:0006265; F:GO:0003677; F:GO:0003917; C:GO:0005694	P:DNA topological change; F:DNA binding; F:DNA topoisomerase type I (single strand cut, ATP-independent) activity; C:chromosome
000001F|arrow.g728.t1	sugar transporter	566	0	93.68	F:GO:0022857; C:GO:0005886	F:transmembrane transporter activity; C:plasma membrane	EC:7	Translocases	P:GO:0055085; F:GO:0022857; C:GO:0016020; C:GO:0016021	P:transmembrane transport; F:transmembrane transporter activity; C:membrane; C:integral component of membrane
000001F|arrow.g729.t1	F-box domain protein	507	0	89.13	F:GO:0003674	F:molecular_function			F:GO:0005515	F:protein binding
000001F|arrow.g730.t1	PDI related protein A	461	0	88.71	F:GO:0016853	F:isomerase activity	EC:5.3.4.1; EC:5.3; EC:5.3.4; EC:5	Protein disulfide-isomerase; Intramolecular oxidoreductases; Intramolecular oxidoreductases; Isomerases	F:GO:0003756	F:protein disulfide isomerase activity
000001F|arrow.g731.t1	nucleolar ATPase Kre33	1067	0	96.55	P:GO:0006399; P:GO:0042254; F:GO:0003723; F:GO:0016746; F:GO:0043167; C:GO:0005730; C:GO:0032991	P:tRNA metabolic process; P:ribosome biogenesis; F:RNA binding; F:transferase activity, transferring acyl groups; F:ion binding; C:nucleolus; C:protein-containing complex	EC:2.3; EC:2; EC:2.3.1	Acyltransferases; Transferases; Acyltransferases	P:GO:0016072; P:GO:0034470; F:GO:0005524; F:GO:0008080	P:rRNA metabolic process; P:ncRNA processing; F:ATP binding; F:N-acetyltransferase activity
000001F|arrow.g732.t1	capsular associated protein	855	0	81.63	C:GO:0005575	C:cellular_component			no GO terms	no GO terms
000001F|arrow.g733.t1	concanavalin A-like lectin/glucanase domain-containing protein	348	0	82.13	P:GO:0005975; F:GO:0016798; C:GO:0005886	P:carbohydrate metabolic process; F:hydrolase activity, acting on glycosyl bonds; C:plasma membrane	EC:3.2; EC:3; EC:3.2.1	Glycosylases; Hydrolases; Glycosylases	P:GO:0005975; F:GO:0004553	P:carbohydrate metabolic process; F:hydrolase activity, hydrolyzing O-glycosyl compounds
000001F|arrow.g734.t1	Golgi CORVET complex core vacuolar protein 8-domain-containing protein	1691	0	88.38	F:GO:0003674; C:GO:0005575	F:molecular_function; C:cellular_component			F:GO:0005515	F:protein binding
000001F|arrow.g735.t1	PLC-like phosphodiesterase	304	0	86.96	P:GO:0006629; F:GO:0003674	P:lipid metabolic process; F:molecular_function	EC:3.1.4; EC:3.1; EC:3	Acting on ester bonds; Acting on ester bonds; Hydrolases	P:GO:0006629; F:GO:0008081	P:lipid metabolic process; F:phosphoric diester hydrolase activity
000001F|arrow.g736.t1	DNA-directed DNA polymerase theta	949	0	89.73	P:GO:0006259; P:GO:0009058; F:GO:0016779; F:GO:0043167	P:DNA metabolic process; P:biosynthetic process; F:nucleotidyltransferase activity; F:ion binding	EC:2.7; EC:2; EC:3; EC:2.7.7.7; EC:2.7.7	Transferring phosphorus-containing groups; Transferases; Hydrolases; DNA-directed DNA polymerase; Transferring phosphorus-containing groups	F:GO:0003676; F:GO:0005524	F:nucleic acid binding; F:ATP binding
000001F|arrow.g737.t1	PHD finger and BAH domain protein (Snt2), putative	1665	0	86.36	P:GO:0007165; F:GO:0043167	P:signal transduction; F:ion binding			P:GO:0035556; F:GO:0003682	P:intracellular signal transduction; F:chromatin binding
000001F|arrow.g738.t1	high affinity cAMP phosphodiesterase	998	0	85.14	P:GO:0007165; F:GO:0043167	P:signal transduction; F:ion binding	EC:3.1.4; EC:3.1.4.17; EC:3.1; EC:3	Acting on ester bonds; 3',5'-cyclic-nucleotide phosphodiesterase; Acting on ester bonds; Hydrolases	P:GO:0007165; F:GO:0004114; F:GO:0008081	P:signal transduction; F:3',5'-cyclic-nucleotide phosphodiesterase activity; F:phosphoric diester hydrolase activity
000001F|arrow.g739.t1	Rdx family-domain-containing protein	156	3.48386e-89	82.55	C:GO:0005575	C:cellular_component			no GO terms	no GO terms
000001F|arrow.g740.t1	Rab5-interacting protein Rab5ip	143	1.76712e-95	89.66	C:GO:0005783; C:GO:0032991	C:endoplasmic reticulum; C:protein-containing complex			C:GO:0005783; C:GO:0016021; C:GO:0072546	C:endoplasmic reticulum; C:integral component of membrane; C:EMC complex
000001F|arrow.g741.t1	sulfate transporter family-domain-containing protein	841	0	93.3	F:GO:0022857; C:GO:0005575	F:transmembrane transporter activity; C:cellular_component	EC:7	Translocases	P:GO:0008272; P:GO:0055085; F:GO:0008271; F:GO:0015116; C:GO:0016020; C:GO:0016021	P:sulfate transport; P:transmembrane transport; F:secondary active sulfate transmembrane transporter activity; F:sulfate transmembrane transporter activity; C:membrane; C:integral component of membrane
000001F|arrow.g742.t1	P-loop containing nucleoside triphosphate hydrolase protein	280	3.37157e-137	79.08	F:GO:0003674; C:GO:0005575	F:molecular_function; C:cellular_component	EC:3	Hydrolases	no GO terms	no GO terms
000001F|arrow.g743.t1	uroporphyrinogen decarboxylase	363	0	97.27	P:GO:0009058; P:GO:0034641; F:GO:0016829	P:biosynthetic process; P:cellular nitrogen compound metabolic process; F:lyase activity	EC:4.1.1; EC:4.1.1.37; EC:4.1; EC:4	Carbon-carbon lyases; Uroporphyrinogen decarboxylase; Carbon-carbon lyases; Lyases	P:GO:0006779; F:GO:0004853	P:porphyrin-containing compound biosynthetic process; F:uroporphyrinogen decarboxylase activity
000001F|arrow.g744.t1	cytosine deaminase	148	7.71345e-105	96.35	P:GO:0006399; P:GO:0009058; P:GO:0044281; F:GO:0016810; C:GO:0032991	P:tRNA metabolic process; P:biosynthetic process; P:small molecule metabolic process; F:hydrolase activity, acting on carbon-nitrogen (but not peptide) bonds; C:protein-containing complex	EC:3.5.4.1; EC:3.5.4; EC:3.5; EC:3; EC:3.5.4.4	Cytosine deaminase; Acting on carbon-nitrogen bonds, other than peptide bonds; Acting on carbon-nitrogen bonds, other than peptide bonds; Hydrolases; Adenosine deaminase	F:GO:0003824	F:catalytic activity
000001F|arrow.g745.t1	mitochondrial protein import protein MAS5	413	0	96.65	P:GO:0006457; P:GO:0006950; F:GO:0043167; F:GO:0051082	P:protein folding; P:response to stress; F:ion binding; F:unfolded protein binding			P:GO:0006457; P:GO:0009408; F:GO:0005524; F:GO:0030544; F:GO:0031072; F:GO:0051082	P:protein folding; P:response to heat; F:ATP binding; F:Hsp70 protein binding; F:heat shock protein binding; F:unfolded protein binding
000001F|arrow.g746.t1	uncharacterized protein BDW43DRAFT_279236	74	4.3284e-21	71.82					no GO terms	no GO terms
000001F|arrow.g747.t1	tRNA methyltransferase	490	0	78.14	P:GO:0006399; F:GO:0003674	P:tRNA metabolic process; F:molecular_function	EC:2	Transferases	P:GO:0036265; F:GO:0005515	P:RNA (guanine-N7)-methylation; F:protein binding
000001F|arrow.g748.t1	60S acidic ribosomal protein P0	312	0	94.3	P:GO:0006412; P:GO:0022618; P:GO:0042254; F:GO:0003735; F:GO:0019843	P:translation; P:ribonucleoprotein complex assembly; P:ribosome biogenesis; F:structural constituent of ribosome; F:rRNA binding			P:GO:0042254	P:ribosome biogenesis
000001F|arrow.g749.t1	GARP complex subunit Vps53, putative	845	0	92.68	P:GO:0016192; C:GO:0005768; C:GO:0005794; C:GO:0005829; C:GO:0032991	P:vesicle-mediated transport; C:endosome; C:Golgi apparatus; C:cytosol; C:protein-containing complex			P:GO:0042147; C:GO:0000938	P:retrograde transport, endosome to Golgi; C:GARP complex
000001F|arrow.g750.t1	aldo/keto reductase	331	0	95.08	F:GO:0016491; F:GO:0043167	F:oxidoreductase activity; F:ion binding	EC:1.1; EC:1; EC:1.1.1; EC:1.1.1.122	Acting on the CH-OH group of donors; Oxidoreductases; Acting on the CH-OH group of donors; D-threo-aldose 1-dehydrogenase	F:GO:0047834	F:D-threo-aldose 1-dehydrogenase activity
000001F|arrow.g751.t1	mRNA export factor mex67	661	0	88.64	P:GO:0016192; F:GO:0003674; C:GO:0005654; C:GO:0005768; C:GO:0005794; C:GO:0005829; C:GO:0032991	P:vesicle-mediated transport; F:molecular_function; C:nucleoplasm; C:endosome; C:Golgi apparatus; C:cytosol; C:protein-containing complex			P:GO:0051028; F:GO:0005515; C:GO:0005634	P:mRNA transport; F:protein binding; C:nucleus
000001F|arrow.g752.t1	endoplasmic reticulum vesicle transporter-domain-containing protein	438	0	93.86	C:GO:0005575	C:cellular_component			no GO terms	no GO terms
000001F|arrow.g753.t1	PH domain protein	1173	0	83.3	F:GO:0016757	F:transferase activity, transferring glycosyl groups	EC:2.4; EC:2	Glycosyltransferases; Transferases	no GO terms	no GO terms
000001F|arrow.g754.t1	predicted protein	503	0	77.53	P:GO:0008150; F:GO:0003674; C:GO:0005575	P:biological_process; F:molecular_function; C:cellular_component			no IPS match	no IPS match
000001F|arrow.g755.t1	C2H2 transcription factor (TFIIIA)	569	0	86.01					no GO terms	no GO terms
000001F|arrow.g756.t1	DNA-directed RNA polymerase I, II, and III subunit Rpb6	161	2.49703e-112	95.53	P:GO:0009058; P:GO:0034641; F:GO:0003677; F:GO:0016779; C:GO:0005654; C:GO:0032991	P:biosynthetic process; P:cellular nitrogen compound metabolic process; F:DNA binding; F:nucleotidyltransferase activity; C:nucleoplasm; C:protein-containing complex	EC:2.7; EC:2; EC:2.7.7; EC:2.7.7.6	Transferring phosphorus-containing groups; Transferases; Transferring phosphorus-containing groups; DNA-directed RNA polymerase	P:GO:0006351; F:GO:0003677; F:GO:0003899; C:GO:0005634; C:GO:0005665	P:transcription, DNA-templated; F:DNA binding; F:DNA-directed 5'-3' RNA polymerase activity; C:nucleus; C:RNA polymerase II, core complex
000001F|arrow.g757.t1	predicted protein	87	6.62935e-36	80.46					no GO terms	no GO terms
000001F|arrow.g758.t1	MFS general substrate transporter	477	0	90.4	F:GO:0022857; C:GO:0005575	F:transmembrane transporter activity; C:cellular_component	EC:7	Translocases	P:GO:0055085; F:GO:0022857	P:transmembrane transport; F:transmembrane transporter activity
000001F|arrow.g759.t1	acyl-CoA N-acyltransferase	200	4.52026e-137	91.9	F:GO:0016746	F:transferase activity, transferring acyl groups	EC:2.3; EC:2; EC:2.3.1	Acyltransferases; Transferases; Acyltransferases	F:GO:0008080	F:N-acetyltransferase activity
000001F|arrow.g760.t1	putative integral membrane protein	416	0	88.98					no GO terms	no GO terms
000001F|arrow.g761.t1	eukaryotic translation initiation factor 3 subunit A	1039	0	94.8	P:GO:0022618; F:GO:0008135; C:GO:0005737; C:GO:0032991	P:ribonucleoprotein complex assembly; F:translation factor activity, RNA binding; C:cytoplasm; C:protein-containing complex			C:GO:0005852	C:eukaryotic translation initiation factor 3 complex
000001F|arrow.g762.t1	G-protein complex gamma subunit Ste18/GpgA	90	1.97409e-61	99.22	P:GO:0000003; P:GO:0007165; F:GO:0003674	P:reproduction; P:signal transduction; F:molecular_function			P:GO:0000750; P:GO:0007186; F:GO:0031681	P:pheromone-dependent signal transduction involved in conjugation with cellular fusion; P:G protein-coupled receptor signaling pathway; F:G-protein beta-subunit binding
000001F|arrow.g763.t1	cysteine-rich secreted protein	374	0	74.03	P:GO:0008150; F:GO:0003674; C:GO:0005575	P:biological_process; F:molecular_function; C:cellular_component			no GO terms	no GO terms
000001F|arrow.g764.t1	SAM domain protein	615	0	96.68	P:GO:0015031; P:GO:0034655; F:GO:0003677; F:GO:0003729; C:GO:0005737	P:protein transport; P:nucleobase-containing compound catabolic process; F:DNA binding; F:mRNA binding; C:cytoplasm			P:GO:0043488; F:GO:0003729; F:GO:0005515	P:regulation of mRNA stability; F:mRNA binding; F:protein binding
000001F|arrow.g765.t1	RNA polymerase III transcription factor TFIIIC subunit Tfc4	1084	0	85.19	P:GO:0009058; P:GO:0034641; F:GO:0003674	P:biosynthetic process; P:cellular nitrogen compound metabolic process; F:molecular_function			P:GO:0006383; F:GO:0005515	P:transcription by RNA polymerase III; F:protein binding
000001F|arrow.g766.t1	predicted protein	520	0	78.97	F:GO:0016491; F:GO:0043167	F:oxidoreductase activity; F:ion binding	EC:1	Oxidoreductases	F:GO:0016491; F:GO:0050660; F:GO:0071949	F:oxidoreductase activity; F:flavin adenine dinucleotide binding; F:FAD binding
000001F|arrow.g767.t1	Patatin-like serine hydrolase, putative	715	0	89.97	P:GO:0006629; P:GO:0009056; F:GO:0003674; C:GO:0005811	P:lipid metabolic process; P:catabolic process; F:molecular_function; C:lipid droplet	EC:3.1; EC:3; EC:3.1.1; EC:3.1.1.1; EC:3.1.1.3	Acting on ester bonds; Hydrolases; Acting on ester bonds; Carboxylesterase; Triacylglycerol lipase	P:GO:0006629; F:GO:0004806	P:lipid metabolic process; F:triglyceride lipase activity
000001F|arrow.g768.t1	leucine Rich Repeat domain protein	797	0	87.92	F:GO:0003674	F:molecular_function			F:GO:0005515	F:protein binding
000001F|arrow.g769.t1	metallo-dependent phosphatase	324	0	99.54	P:GO:0006464; P:GO:0007010; P:GO:0007059; P:GO:0040007; P:GO:0051276; P:GO:0051301; P:GO:0140014; F:GO:0016791; F:GO:0043167; C:GO:0005730; C:GO:0005737; C:GO:0005840	P:cellular protein modification process; P:cytoskeleton organization; P:chromosome segregation; P:growth; P:chromosome organization; P:cell division; P:mitotic nuclear division; F:phosphatase activity; F:ion binding; C:nucleolus; C:cytoplasm; C:ribosome	EC:3.1.3.16; EC:3.1; EC:3; EC:3.1.3	Protein-serine/threonine phosphatase; Acting on ester bonds; Hydrolases; Acting on ester bonds	F:GO:0016787	F:hydrolase activity
000001F|arrow.g770.t1	Small COPII coat GTPase sar1	189	7.20313e-139	99.95	P:GO:0015031; P:GO:0016192; P:GO:0061024; P:GO:0065003; F:GO:0003924; F:GO:0043167; C:GO:0005783; C:GO:0005794; C:GO:0031410; C:GO:0032991	P:protein transport; P:vesicle-mediated transport; P:membrane organization; P:protein-containing complex assembly; F:GTPase activity; F:ion binding; C:endoplasmic reticulum; C:Golgi apparatus; C:cytoplasmic vesicle; C:protein-containing complex	EC:3.6.1; EC:3.6; EC:3; EC:3.6.1.15	Acting on acid anhydrides; Acting on acid anhydrides; Hydrolases; Nucleoside-triphosphate phosphatase	P:GO:0006886; F:GO:0005525	P:intracellular protein transport; F:GTP binding
000001F|arrow.g771.t1	HMG (high mobility group) box family protein	715	0	84.51					no GO terms	no GO terms
000001F|arrow.g772.t1	calmodulin-binding protein Sha1	1002	0	75.56	F:GO:0003674	F:molecular_function			F:GO:0005515	F:protein binding
000001F|arrow.g773.t1	proliferating cell nuclear antigen	615	0	92.19	P:GO:0006259; P:GO:0009058; F:GO:0003677; F:GO:0008092; F:GO:0030234; C:GO:0005575	P:DNA metabolic process; P:biosynthetic process; F:DNA binding; F:cytoskeletal protein binding; F:enzyme regulator activity; C:cellular_component			F:GO:0017022	F:myosin binding
000001F|arrow.g774.t1	proliferating cell nuclear antigen	363	0	95.93	P:GO:0000003; P:GO:0006259; P:GO:0006950; P:GO:0007059; P:GO:0009056; P:GO:0009058; P:GO:0022607; P:GO:0051276; P:GO:0140014; F:GO:0003677; F:GO:0008092; F:GO:0030234; C:GO:0000228; C:GO:0005654; C:GO:0032991	P:reproduction; P:DNA metabolic process; P:response to stress; P:chromosome segregation; P:catabolic process; P:biosynthetic process; P:cellular component assembly; P:chromosome organization; P:mitotic nuclear division; F:DNA binding; F:cytoskeletal protein binding; F:enzyme regulator activity; C:nuclear chromosome; C:nucleoplasm; C:protein-containing complex			P:GO:0006275; F:GO:0003677; F:GO:0030337	P:regulation of DNA replication; F:DNA binding; F:DNA polymerase processivity factor activity
000001F|arrow.g775.t1	zinc-binding oxidoreductase	286	3.79646e-56	65.56	P:GO:0055114; F:GO:0016491	P:obsolete oxidation-reduction process; F:oxidoreductase activity			no GO terms	no GO terms
000001F|arrow.g776.t1	hypothetical protein BDV36DRAFT_296403	263	1.77701e-107	65.15					no IPS match	no IPS match
000001F|arrow.g777.t1	predicted protein	301	2.15578e-162	68.8	C:GO:0005575	C:cellular_component			no GO terms	no GO terms
000001F|arrow.g778.t1	hypothetical protein BO78DRAFT_329788	162	1.26481e-22	77.41					no IPS match	no IPS match
000001F|arrow.g779.t1	hypothetical protein BO80DRAFT_468702	140	2.36803e-26	56.49					no GO terms	no GO terms
000001F|arrow.g780.t1	predicted protein	378	0	85.13	C:GO:0005575	C:cellular_component			no GO terms	no GO terms
000001F|arrow.g781.t1	predicted protein	518	0	84.89	F:GO:0003674	F:molecular_function	EC:3	Hydrolases	no GO terms	no GO terms
000001F|arrow.g782.t1	dimethylaniline monooxygenase	585	0	85.93	F:GO:0016491; F:GO:0043167	F:oxidoreductase activity; F:ion binding	EC:1.14.13.8; EC:1; EC:1.14; EC:1.14.13	Flavin-containing monooxygenase; Oxidoreductases; Acting on paired donors, with incorporation or reduction of molecular oxygen. The oxygen incorporated need not be derived from O(2); Acting on paired donors, with incorporation or reduction of molecular oxygen. The oxygen incorporated need not be derived from O(2)	F:GO:0004499; F:GO:0050660; F:GO:0050661	F:N,N-dimethylaniline monooxygenase activity; F:flavin adenine dinucleotide binding; F:NADP binding
000001F|arrow.g783.t1	chitinase, putative	203	1.16186e-43	64.23	P:GO:0008150; F:GO:0016798	P:biological_process; F:hydrolase activity, acting on glycosyl bonds	EC:3.2; EC:3	Glycosylases; Hydrolases	no GO terms	no GO terms
000001F|arrow.g784.t1	glycoside hydrolase	491	2.48328e-108	53.81	P:GO:0008150; F:GO:0003674	P:biological_process; F:molecular_function	EC:3	Hydrolases	no GO terms	no GO terms
000001F|arrow.g785.t1	predicted protein	464	0	72.65					no IPS match	no IPS match
000001F|arrow.g786.t1	FAD/NAD(P)-binding domain-containing protein	545	0	88.33	F:GO:0016491; F:GO:0043167	F:oxidoreductase activity; F:ion binding	EC:1.14.13.8; EC:1; EC:1.14; EC:1.14.13	Flavin-containing monooxygenase; Oxidoreductases; Acting on paired donors, with incorporation or reduction of molecular oxygen. The oxygen incorporated need not be derived from O(2); Acting on paired donors, with incorporation or reduction of molecular oxygen. The oxygen incorporated need not be derived from O(2)	F:GO:0004499; F:GO:0050660; F:GO:0050661	F:N,N-dimethylaniline monooxygenase activity; F:flavin adenine dinucleotide binding; F:NADP binding
000001F|arrow.g787.t1	MFS general substrate transporter	513	0	87.45	F:GO:0022857; C:GO:0005575	F:transmembrane transporter activity; C:cellular_component	EC:7	Translocases	P:GO:0055085; F:GO:0022857	P:transmembrane transport; F:transmembrane transporter activity
000001F|arrow.g788.t1	putative lipase/esterase	360	0	83.1	F:GO:0003674	F:molecular_function	EC:3	Hydrolases	F:GO:0016787	F:hydrolase activity
000001F|arrow.g789.t1	transcription factor, fungi	658	0	70.69	P:GO:0009058; P:GO:0034641; F:GO:0003677; F:GO:0003700; F:GO:0043167	P:biosynthetic process; P:cellular nitrogen compound metabolic process; F:DNA binding; F:DNA-binding transcription factor activity; F:ion binding			P:GO:0006351; P:GO:0006355; F:GO:0000981; F:GO:0003677; F:GO:0008270	P:transcription, DNA-templated; P:regulation of transcription, DNA-templated; F:DNA-binding transcription factor activity, RNA polymerase II-specific; F:DNA binding; F:zinc ion binding
000001F|arrow.g790.t1	predicted protein	336	1.3409e-76	46.67					no IPS match	no IPS match
000001F|arrow.g791.t1	metallo-beta-lactamase superfamily protein	360	0	83.85	F:GO:0003674	F:molecular_function	EC:3	Hydrolases	no GO terms	no GO terms
000001F|arrow.g792.t1	short chain dehydrogenase/ reductase	321	0	91.42	F:GO:0016491; F:GO:0043167	F:oxidoreductase activity; F:ion binding	EC:1	Oxidoreductases	F:GO:0016491	F:oxidoreductase activity
000001F|arrow.g793.t1	alcohol dehydrogenase	352	0	86.49	F:GO:0016491; F:GO:0043167	F:oxidoreductase activity; F:ion binding	EC:1	Oxidoreductases	F:GO:0008270; F:GO:0016491	F:zinc ion binding; F:oxidoreductase activity
000001F|arrow.g794.t1	UPF0658 Golgi apparatus membrane protein C23H3.04	335	0	93.01	C:GO:0005575	C:cellular_component			no GO terms	no GO terms
000001F|arrow.g795.t1	sin3 complex subunit (Stb2)	863	0	82.84					no GO terms	no GO terms
000001F|arrow.g796.t1	Tim10/DDP family zinc finger-domain-containing protein	93	6.84535e-63	96.24	P:GO:0006605; P:GO:0007005; P:GO:0061024; C:GO:0005739; C:GO:0032991	P:protein targeting; P:mitochondrion organization; P:membrane organization; C:mitochondrion; C:protein-containing complex			P:GO:0045039; C:GO:0042719	P:protein insertion into mitochondrial inner membrane; C:mitochondrial intermembrane space protein transporter complex
000001F|arrow.g797.t1	lysyl-tRNA synthetase	557	0	89.15	P:GO:0006399; P:GO:0006412; P:GO:0006520; F:GO:0016874; F:GO:0043167; C:GO:0005737	P:tRNA metabolic process; P:translation; P:cellular amino acid metabolic process; F:ligase activity; F:ion binding; C:cytoplasm	EC:6.1; EC:6.1.1.6; EC:6.1.1; EC:6	Forming carbon-oxygen bonds; Lysine--tRNA ligase; Forming carbon-oxygen bonds; Ligases	P:GO:0006418; P:GO:0006430; F:GO:0000166; F:GO:0003676; F:GO:0004812; F:GO:0004824; F:GO:0005524; C:GO:0005737	P:tRNA aminoacylation for protein translation; P:lysyl-tRNA aminoacylation; F:nucleotide binding; F:nucleic acid binding; F:aminoacyl-tRNA ligase activity; F:lysine-tRNA ligase activity; F:ATP binding; C:cytoplasm
000001F|arrow.g798.t1	clavaminate synthase-like protein	321	0	75.28					no GO terms	no GO terms
000001F|arrow.g799.t1	transcription-silencing protein Clr2-domain-containing protein	727	0	73.93	P:GO:0009058; P:GO:0034641; P:GO:0051276; F:GO:0003674; C:GO:0005654; C:GO:0032991	P:biosynthetic process; P:cellular nitrogen compound metabolic process; P:chromosome organization; F:molecular_function; C:nucleoplasm; C:protein-containing complex			P:GO:0006342; C:GO:0070824	P:chromatin silencing; C:SHREC complex
000001F|arrow.g800.t1	ABC transporter transmembrane region 2-domain-containing protein	820	0	95.47	P:GO:0006629; P:GO:0009056; P:GO:0044281; F:GO:0016887; F:GO:0022857; F:GO:0043167; C:GO:0005777	P:lipid metabolic process; P:catabolic process; P:small molecule metabolic process; F:ATPase activity; F:transmembrane transporter activity; F:ion binding; C:peroxisome	EC:3.6.1; EC:3.6; EC:3; EC:7; EC:7.2.2; EC:3.6.1.15	Acting on acid anhydrides; Acting on acid anhydrides; Hydrolases; Translocases; Catalysing the translocation of inorganic cations; Nucleoside-triphosphate phosphatase	P:GO:0055085; F:GO:0005524; F:GO:0042626; C:GO:0016021	P:transmembrane transport; F:ATP binding; F:ATPase-coupled transmembrane transporter activity; C:integral component of membrane
000001F|arrow.g801.t1	HAD-like domain-containing protein	564	0	77.84	F:GO:0016791	F:phosphatase activity	EC:3.1; EC:3; EC:3.1.3	Acting on ester bonds; Hydrolases; Acting on ester bonds	F:GO:0016791	F:phosphatase activity
000001F|arrow.g802.t1	protein phosphatase 1 regulatory subunit SDS22	343	0	94.96	F:GO:0003674	F:molecular_function	EC:3	Hydrolases	F:GO:0005515	F:protein binding
000001F|arrow.g803.t1	probable NAD(P)H-dependent D-xylose reductase xyl1	207	1.0423e-91	70.37	P:GO:0008150; F:GO:0003674; C:GO:0005575	P:biological_process; F:molecular_function; C:cellular_component			no GO terms	no GO terms
000001F|arrow.g804.t1	putative NAD(P)H-dependent D-xylose reductase xyl1	320	0	95.94	P:GO:0005975; P:GO:0009056; P:GO:0044281; F:GO:0016491; C:GO:0005576	P:carbohydrate metabolic process; P:catabolic process; P:small molecule metabolic process; F:oxidoreductase activity; C:extracellular region	EC:1.1.1.21; EC:1.1; EC:1; EC:1.1.1; EC:1.1.1.122; EC:1.1.1.2	Aldose reductase; Acting on the CH-OH group of donors; Oxidoreductases; Acting on the CH-OH group of donors; D-threo-aldose 1-dehydrogenase; Alcohol dehydrogenase (NADP(+))	P:GO:0042843; F:GO:0016491; F:GO:0032866; F:GO:0047834	P:D-xylose catabolic process; F:oxidoreductase activity; F:D-xylose:NADP reductase activity; F:D-threo-aldose 1-dehydrogenase activity
000001F|arrow.g805.t1	regulatory protein AbaA	799	0	84.46	P:GO:0009058; P:GO:0034641; F:GO:0003700	P:biosynthetic process; P:cellular nitrogen compound metabolic process; F:DNA-binding transcription factor activity			P:GO:0006355; F:GO:0003700	P:regulation of transcription, DNA-templated; F:DNA-binding transcription factor activity
000001F|arrow.g806.t1	multiple RNA-binding domain-containing protein 1	814	0	90.86	P:GO:0034641; P:GO:0042254; F:GO:0003723	P:cellular nitrogen compound metabolic process; P:ribosome biogenesis; F:RNA binding			F:GO:0003676	F:nucleic acid binding
000001F|arrow.g807.t1	putative dynein light chain type 1	94	4.04104e-65	99.89	P:GO:0000003; P:GO:0007049; P:GO:0015031; P:GO:0030154; P:GO:0030705; P:GO:0048646; F:GO:0003674; C:GO:0005635; C:GO:0005737; C:GO:0005856; C:GO:0032991	P:reproduction; P:cell cycle; P:protein transport; P:cell differentiation; P:cytoskeleton-dependent intracellular transport; P:anatomical structure formation involved in morphogenesis; F:molecular_function; C:nuclear envelope; C:cytoplasm; C:cytoskeleton; C:protein-containing complex	EC:3.6.1; EC:3.6; EC:3; EC:3.6.1.15	Acting on acid anhydrides; Acting on acid anhydrides; Hydrolases; Nucleoside-triphosphate phosphatase	P:GO:0007017; C:GO:0005875; C:GO:0030286	P:microtubule-based process; C:microtubule associated complex; C:dynein complex
000001F|arrow.g808.t1	rhodopsin family protein	124	1.0026e-86	89.08	C:GO:0005840	C:ribosome			no GO terms	no GO terms
000001F|arrow.g809.t1	urea active transporter 1	679	0	93.8	F:GO:0022857; C:GO:0005575	F:transmembrane transporter activity; C:cellular_component	EC:7	Translocases	P:GO:0055085; P:GO:0071918; F:GO:0015204; F:GO:0022857; C:GO:0016020; C:GO:0016021	P:transmembrane transport; P:urea transmembrane transport; F:urea transmembrane transporter activity; F:transmembrane transporter activity; C:membrane; C:integral component of membrane
000001F|arrow.g810.t1	transport protein sec61 subunit beta	127	7.57912e-82	94.56	P:GO:0015031; C:GO:0005783; C:GO:0032991	P:protein transport; C:endoplasmic reticulum; C:protein-containing complex			P:GO:0006886; C:GO:0005784	P:intracellular protein transport; C:Sec61 translocon complex
000001F|arrow.g811.t1	mitochondrial 37S ribosomal protein NAM9	459	0	91.81	P:GO:0006412; F:GO:0003735; F:GO:0019843; C:GO:0005840; C:GO:0032991	P:translation; F:structural constituent of ribosome; F:rRNA binding; C:ribosome; C:protein-containing complex			P:GO:0006412; F:GO:0003723; F:GO:0003735; F:GO:0019843; C:GO:0015935	P:translation; F:RNA binding; F:structural constituent of ribosome; F:rRNA binding; C:small ribosomal subunit
000001F|arrow.g812.t1	heterokaryon incompatibility protein-domain-containing protein	238	3.01467e-11	47.45					no IPS match	no IPS match
000001F|arrow.g813.t1	ankyrin repeat-containing domain protein	158	5.68585e-71	77.1	P:GO:0008150; F:GO:0003674; C:GO:0005575	P:biological_process; F:molecular_function; C:cellular_component			no GO terms	no GO terms
000001F|arrow.g814.t1	WD-repeat protein	738	0	62.49	P:GO:0034641; P:GO:0044281; F:GO:0003674	P:cellular nitrogen compound metabolic process; P:small molecule metabolic process; F:molecular_function			P:GO:0009116; F:GO:0003824	P:nucleoside metabolic process; F:catalytic activity
000001F|arrow.g815.t1	DNA repair protein Rad26	795	0	79.91	P:GO:0000077; C:GO:0005634	P:DNA damage checkpoint; C:nucleus			no GO terms	no GO terms
000001F|arrow.g816.t1	phosphatidate cytidylyltransferase	454	0	96.5	P:GO:0006629; P:GO:0009058; F:GO:0016779; C:GO:0005575	P:lipid metabolic process; P:biosynthetic process; F:nucleotidyltransferase activity; C:cellular_component	EC:2.7.7.41; EC:2.7; EC:2; EC:2.7.7	Phosphatidate cytidylyltransferase; Transferring phosphorus-containing groups; Transferases; Transferring phosphorus-containing groups	F:GO:0004605; F:GO:0016772; C:GO:0016020	F:phosphatidate cytidylyltransferase activity; F:transferase activity, transferring phosphorus-containing groups; C:membrane
000001F|arrow.g817.t1	cyclin-like protein	416	0	88.05	P:GO:0007049; P:GO:0009058; P:GO:0034641; F:GO:0008233; F:GO:0030234	P:cell cycle; P:biosynthetic process; P:cellular nitrogen compound metabolic process; F:peptidase activity; F:enzyme regulator activity	EC:3.4.21.73; EC:3.4.24.7; EC:3.4.21.71; EC:3.4.24.3; EC:3.4.21.34; EC:3.4.21.78; EC:3.4.21.75; EC:3.4.21.26; EC:3.4.21.27; EC:3.4.21.68; EC:3.4.21.69; EC:3.4.24.34; EC:3.4.21.41; EC:3.4.21.83; EC:3.4.21.88; EC:3.4.21.45; EC:3.4.21.89; EC:3.4.21.42; EC:3.4.19.1; EC:3.4.21.43; EC:3.4.21.87; EC:3.4.21.38; EC:3.4.21.35; EC:3.4.21.79; EC:3.4.21.36; EC:3.4.21.102; EC:3.4.21.39; EC:3.4.21; EC:3.4.21.4;…	U-plasminogen activator; Interstitial collagenase; Pancreatic elastase II; Microbial collagenase; Plasma kallikrein; Granzyme A; Furin; Prolyl oligopeptidase; Coagulation factor XIa; T-plasminogen activator; Protein C (activated); Neutrophil collagenase; Complement subcomponent C1r; Oligopeptidase B; Repressor LexA; Complement factor I; Signal peptidase I; Complement subcomponent C1s; Acylaminoac…	P:GO:0006357; F:GO:0016538	P:regulation of transcription by RNA polymerase II; F:cyclin-dependent protein serine/threonine kinase regulator activity
000001F|arrow.g818.t1	glutathione S-transferase	279	6.33914e-153	83.47	P:GO:0006790; P:GO:0034641; F:GO:0016765; F:GO:0022857; C:GO:0005737	P:sulfur compound metabolic process; P:cellular nitrogen compound metabolic process; F:transferase activity, transferring alkyl or aryl (other than methyl) groups; F:transmembrane transporter activity; C:cytoplasm	EC:2.5.1; EC:2.5.1.18; EC:2.5; EC:2; EC:7	Transferring alkyl or aryl groups, other than methyl groups; Glutathione transferase; Transferring alkyl or aryl groups, other than methyl groups; Transferases; Translocases	P:GO:0006749; F:GO:0005515	P:glutathione metabolic process; F:protein binding
000001F|arrow.g819.t1	phosphotransferase enzyme family protein	351	0	89.84	F:GO:0016301; C:GO:0005737	F:kinase activity; C:cytoplasm	EC:2.7.1; EC:2.7.1.172; EC:2.7; EC:2	Transferring phosphorus-containing groups; Protein-ribulosamine 3-kinase; Transferring phosphorus-containing groups; Transferases	no GO terms	no GO terms
000001F|arrow.g820.t1	armadillo-type protein	1000	0	90.44	F:GO:0003674; C:GO:0005737	F:molecular_function; C:cytoplasm			F:GO:0005515	F:protein binding
000001F|arrow.g821.t1	cyclin-dependent protein kinase regulator Pho80	251	1.31593e-152	80.63	P:GO:0006464; P:GO:0007049; F:GO:0016301; F:GO:0019899	P:cellular protein modification process; P:cell cycle; F:kinase activity; F:enzyme binding	EC:2.7; EC:2	Transferring phosphorus-containing groups; Transferases	P:GO:0000079; F:GO:0019901	P:regulation of cyclin-dependent protein serine/threonine kinase activity; F:protein kinase binding
000001F|arrow.g822.t1	tRNA-specific adenosine deaminase subunit tad3	495	0	73.37	P:GO:0006464; P:GO:0007049; F:GO:0019899	P:cellular protein modification process; P:cell cycle; F:enzyme binding			F:GO:0003824	F:catalytic activity
000001F|arrow.g823.t1	topoisomerase II-associated protein PAT1	1465	0	80.69	F:GO:0003674	F:molecular_function			F:GO:0005515	F:protein binding
000001F|arrow.g824.t1	BC10-like protein	152	4.35662e-96	84.19	C:GO:0005575	C:cellular_component			no GO terms	no GO terms
000001F|arrow.g825.t1	chitin synthase III catalytic subunit	287	0	89.43	C:GO:0005575	C:cellular_component			no GO terms	no GO terms
000001F|arrow.g826.t1	dienelactone hydrolase family protein	271	0	98.15	F:GO:0003674; C:GO:0005575	F:molecular_function; C:cellular_component	EC:3	Hydrolases	F:GO:0016787	F:hydrolase activity
000001F|arrow.g827.t1	Delta(24(24(1)))-sterol reductase	548	0	93.27	P:GO:0006629; P:GO:0009058; F:GO:0016491; C:GO:0005575	P:lipid metabolic process; P:biosynthetic process; F:oxidoreductase activity; C:cellular_component	EC:1.3; EC:1; EC:3; EC:1.3.1	Acting on the CH-CH group of donors; Oxidoreductases; Hydrolases; Acting on the CH-CH group of donors	P:GO:0016126; F:GO:0016628; C:GO:0016020	P:sterol biosynthetic process; F:oxidoreductase activity, acting on the CH-CH group of donors, NAD or NADP as acceptor; C:membrane
000001F|arrow.g828.t1	RING finger domain protein	707	0	83.95	F:GO:0043167; C:GO:0005737	F:ion binding; C:cytoplasm			no GO terms	no GO terms
000001F|arrow.g829.t1	ubiquitin hydrolase	860	0	85.71	P:GO:0009056; F:GO:0008233	P:catabolic process; F:peptidase activity	EC:3.4; EC:3.4.19.9; EC:3; EC:3.4.19; EC:3.4.19.2; EC:3.4.19.12	Acting on peptide bonds (peptidases); Folate gamma-glutamyl hydrolase; Hydrolases; Acting on peptide bonds (peptidases); Peptidyl-glycinamidase; Ubiquitinyl hydrolase 1	P:GO:0006511; P:GO:0016579; F:GO:0004843	P:ubiquitin-dependent protein catabolic process; P:protein deubiquitination; F:thiol-dependent ubiquitin-specific protease activity
000001F|arrow.g830.t1	Na/H antiporter, putative	553	0	93.52	F:GO:0022857; C:GO:0005575	F:transmembrane transporter activity; C:cellular_component	EC:7	Translocases	P:GO:0006812; P:GO:0055085; F:GO:0015299; C:GO:0016021	P:cation transport; P:transmembrane transport; F:solute:proton antiporter activity; C:integral component of membrane
000001F|arrow.g831.t1	ribonuclease H	389	0	87	P:GO:0006259; P:GO:0034655; F:GO:0004518; F:GO:0043167	P:DNA metabolic process; P:nucleobase-containing compound catabolic process; F:nuclease activity; F:ion binding	EC:3.1.30; EC:3.1; EC:3; EC:3.1.26; EC:3.1.26.4	Acting on ester bonds; Acting on ester bonds; Hydrolases; Acting on ester bonds; Ribonuclease H	F:GO:0000287; F:GO:0003676; F:GO:0004523	F:magnesium ion binding; F:nucleic acid binding; F:RNA-DNA hybrid ribonuclease activity
000001F|arrow.g832.t1	ANK ankyrin repeat protein	251	1.30686e-124	74.37	F:GO:0016491; F:GO:0043167; C:GO:0005575	F:oxidoreductase activity; F:ion binding; C:cellular_component	EC:1; EC:1.14	Oxidoreductases; Acting on paired donors, with incorporation or reduction of molecular oxygen. The oxygen incorporated need not be derived from O(2)	no GO terms	no GO terms
000001F|arrow.g833.t1	predicted protein	582	0	87.69	F:GO:0043167	F:ion binding	EC:3.1; EC:3; EC:3.1.1; EC:3.1.1.1	Acting on ester bonds; Hydrolases; Acting on ester bonds; Carboxylesterase	no GO terms	no GO terms
000001F|arrow.g834.t1	benzoate 4-monooxygenase cytochrome P450	505	0	76.28	F:GO:0016491; F:GO:0022857; F:GO:0043167; C:GO:0005575	F:oxidoreductase activity; F:transmembrane transporter activity; F:ion binding; C:cellular_component	EC:1; EC:7	Oxidoreductases; Translocases	P:GO:0055085; F:GO:0022857	P:transmembrane transport; F:transmembrane transporter activity
000001F|arrow.g835.t1	predicted protein	154	1.98602e-22	68.82					no IPS match	no IPS match
000001F|arrow.g836.t1	hypothetical protein ATETN484_0004074900	115	1.4809e-56	67.88	P:GO:0008150; F:GO:0003674; C:GO:0005575	P:biological_process; F:molecular_function; C:cellular_component			no IPS match	no IPS match
000001F|arrow.g837.t1	hypothetical protein BDW42DRAFT_197485	220	5.45137e-12	40.48					no GO terms	no GO terms
000001F|arrow.g838.t1	Galactose oxidase	663	0	72.73	F:GO:0003674	F:molecular_function			F:GO:0005515	F:protein binding
000001F|arrow.g839.t1	Dye-decolorizing peroxidase	486	0	67.44	P:GO:0008150; F:GO:0016491	P:biological_process; F:oxidoreductase activity	EC:1.11; EC:1; EC:1.11.1	Acting on a peroxide as acceptor; Oxidoreductases; Acting on a peroxide as acceptor	F:GO:0004601; F:GO:0020037	F:peroxidase activity; F:heme binding
000001F|arrow.g840.t1	acyl-coenzyme A synthetase ACSM3	714	0	66.28	F:GO:0016491	F:oxidoreductase activity	EC:1.11; EC:1; EC:1.11.1	Acting on a peroxide as acceptor; Oxidoreductases; Acting on a peroxide as acceptor	F:GO:0004601	F:peroxidase activity
000001F|arrow.g841.t1	fatty acid synthase S-acetyltransferase	2585	0	62.1	P:GO:0006629; P:GO:0009058; P:GO:0044281; F:GO:0016491; F:GO:0016746	P:lipid metabolic process; P:biosynthetic process; P:small molecule metabolic process; F:oxidoreductase activity; F:transferase activity, transferring acyl groups	EC:2.3.1.41; EC:2.3.1.85; EC:2.3; EC:1; EC:2; EC:2.3.1	Beta-ketoacyl-[acyl-carrier-protein] synthase I; Fatty-acid synthase system; Acyltransferases; Oxidoreductases; Transferases; Acyltransferases	P:GO:0006633; F:GO:0004315; F:GO:0016491; F:GO:0016740; F:GO:0016746; F:GO:0031177	P:fatty acid biosynthetic process; F:3-oxoacyl-[acyl-carrier-protein] synthase activity; F:oxidoreductase activity; F:transferase activity; F:transferase activity, transferring acyl groups; F:phosphopantetheine binding
000001F|arrow.g842.t1	predicted protein	175	1.01307e-110	72.81					no GO terms	no GO terms
000001F|arrow.g843.t1	beta-glucosidase 1A	620	0	91.27	P:GO:0005975; F:GO:0016798	P:carbohydrate metabolic process; F:hydrolase activity, acting on glycosyl bonds	EC:3.2; EC:3; EC:3.2.1	Glycosylases; Hydrolases; Glycosylases	P:GO:0005975; F:GO:0004553	P:carbohydrate metabolic process; F:hydrolase activity, hydrolyzing O-glycosyl compounds
000001F|arrow.g844.t1	putative flavo protein	560	0	90.21	F:GO:0016491; F:GO:0043167	F:oxidoreductase activity; F:ion binding	EC:1.14.13.8; EC:1; EC:1.14; EC:1.14.13	Flavin-containing monooxygenase; Oxidoreductases; Acting on paired donors, with incorporation or reduction of molecular oxygen. The oxygen incorporated need not be derived from O(2); Acting on paired donors, with incorporation or reduction of molecular oxygen. The oxygen incorporated need not be derived from O(2)	F:GO:0004499; F:GO:0050660; F:GO:0050661	F:N,N-dimethylaniline monooxygenase activity; F:flavin adenine dinucleotide binding; F:NADP binding
000001F|arrow.g845.t1	hypothetical protein ATETN484_0004075600	383	0	82.16	C:GO:0005575	C:cellular_component			no GO terms	no GO terms
000001F|arrow.g846.t1	hscarg dehydrogenase	332	0	80.71	P:GO:0008150; F:GO:0003674; C:GO:0005575	P:biological_process; F:molecular_function; C:cellular_component			no GO terms	no GO terms
000001F|arrow.g847.t1	choline transport protein	466	0	85.08	P:GO:0006629; P:GO:0009056; P:GO:0034641; F:GO:0016798; F:GO:0022857; C:GO:0005575	P:lipid metabolic process; P:catabolic process; P:cellular nitrogen compound metabolic process; F:hydrolase activity, acting on glycosyl bonds; F:transmembrane transporter activity; C:cellular_component	EC:3.2; EC:3; EC:3.2.1.46; EC:3.2.1.45; EC:7; EC:3.2.1	Glycosylases; Hydrolases; Galactosylceramidase; Glucosylceramidase; Translocases; Glycosylases	P:GO:0006665; P:GO:0006683; F:GO:0004336; F:GO:0004348	P:sphingolipid metabolic process; P:galactosylceramide catabolic process; F:galactosylceramidase activity; F:glucosylceramidase activity
000001F|arrow.g848.t1	NAD(P)-binding protein	302	0	85.63					no GO terms	no GO terms
000001F|arrow.g849.t1	predicted protein	68	1.0988e-29	70.93					no GO terms	no GO terms
000001F|arrow.g850.t1	FAD-binding domain-containing protein	490	0	81.7	F:GO:0016491; F:GO:0043167	F:oxidoreductase activity; F:ion binding	EC:1	Oxidoreductases	F:GO:0016491; F:GO:0050660; F:GO:0071949	F:oxidoreductase activity; F:flavin adenine dinucleotide binding; F:FAD binding
000001F|arrow.g851.t1	predicted protein	668	0	66.12					no GO terms	no GO terms
000001F|arrow.g852.t1	hypothetical protein ATETN484_0004076400	297	0	85.81	F:GO:0016491	F:oxidoreductase activity	EC:1	Oxidoreductases	F:GO:0016491	F:oxidoreductase activity
000001F|arrow.g853.t1	carboxylesterase, type B	680	0	81.79	F:GO:0003674	F:molecular_function	EC:3	Hydrolases	no GO terms	no GO terms
000001F|arrow.g854.t1	MFS general substrate transporter	573	0	84.94	F:GO:0022857; C:GO:0005886	F:transmembrane transporter activity; C:plasma membrane	EC:7	Translocases	P:GO:0055085; F:GO:0022857; C:GO:0016021	P:transmembrane transport; F:transmembrane transporter activity; C:integral component of membrane
000001F|arrow.g855.t1	cellobiose dehydrogenase	231	9.60742e-139	70.16					no GO terms	no GO terms
000001F|arrow.g856.t1	mannan endo-1,4-beta-mannosidase F	395	0	87.39	P:GO:0005975; F:GO:0016798; C:GO:0005576	P:carbohydrate metabolic process; F:hydrolase activity, acting on glycosyl bonds; C:extracellular region	EC:3.2; EC:3; EC:3.2.1.25; EC:3.2.1.78; EC:3.2.1	Glycosylases; Hydrolases; Beta-mannosidase; Mannan endo-1,4-beta-mannosidase; Glycosylases	P:GO:0071704; F:GO:0004553	P:organic substance metabolic process; F:hydrolase activity, hydrolyzing O-glycosyl compounds
000001F|arrow.g857.t1	Putative Phosphate-repressible phosphate permease	576	0	85.23	F:GO:0022857; C:GO:0005886	F:transmembrane transporter activity; C:plasma membrane	EC:7	Translocases	P:GO:0006817; F:GO:0005315; C:GO:0016020	P:phosphate ion transport; F:inorganic phosphate transmembrane transporter activity; C:membrane
000001F|arrow.g858.t1	predicted protein	137	8.47983e-28	68.25	P:GO:0009058; P:GO:0034641; F:GO:0003674; C:GO:0005575	P:biosynthetic process; P:cellular nitrogen compound metabolic process; F:molecular_function; C:cellular_component			F:GO:0046983	F:protein dimerization activity
000001F|arrow.g859.t1	isoprenoid synthase domain-containing protein	137	1.66694e-71	69.63	F:GO:0016829; F:GO:0043167	F:lyase activity; F:ion binding	EC:4.4; EC:4	Carbon-sulfur lyases; Lyases	no GO terms	no GO terms
000001F|arrow.g860.t1	Mss4-like protein	355	0	73.94	F:GO:0016829; F:GO:0043167	F:lyase activity; F:ion binding	EC:4.4; EC:4	Carbon-sulfur lyases; Lyases	F:GO:0016846	F:carbon-sulfur lyase activity
000001F|arrow.g861.t1	hypothetical protein CNMCM6069_008823	212	2.27972e-65	57.9					no IPS match	no IPS match
000001F|arrow.g862.t1	Alpha/Beta hydrolase protein	550	0	91.59	F:GO:0003674	F:molecular_function	EC:3	Hydrolases	no GO terms	no GO terms
000001F|arrow.g863.t1	Peptidoglycan-binding Lysin subgroup	516	1.2254e-109	52.64	F:GO:0003674	F:molecular_function			F:GO:0008061	F:chitin binding
000001F|arrow.g864.t1	predicted protein	566	0	53.1					no GO terms	no GO terms
000001F|arrow.g865.t1	L-xylulose reductase	271	0	94.1	F:GO:0016491	F:oxidoreductase activity	EC:1	Oxidoreductases	F:GO:0016491	F:oxidoreductase activity
000001F|arrow.g866.t1	C6 transcription factor	1252	0	73.25	P:GO:0009058; P:GO:0034641; F:GO:0003677; F:GO:0003700; F:GO:0022857; F:GO:0043167; C:GO:0005575	P:biosynthetic process; P:cellular nitrogen compound metabolic process; F:DNA binding; F:DNA-binding transcription factor activity; F:transmembrane transporter activity; F:ion binding; C:cellular_component	EC:7	Translocases	P:GO:0006351; P:GO:0006355; P:GO:0055085; F:GO:0000981; F:GO:0003677; F:GO:0008270; F:GO:0022857; C:GO:0016020; C:GO:0016021	P:transcription, DNA-templated; P:regulation of transcription, DNA-templated; P:transmembrane transport; F:DNA-binding transcription factor activity, RNA polymerase II-specific; F:DNA binding; F:zinc ion binding; F:transmembrane transporter activity; C:membrane; C:integral component of membrane
000001F|arrow.g867.t1	NAD(P)-binding protein	263	0	92.18	F:GO:0016491	F:oxidoreductase activity	EC:1	Oxidoreductases	F:GO:0016491	F:oxidoreductase activity
000001F|arrow.g868.t1	putative uridine kinase C227.14	257	4.57247e-138	75.66	F:GO:0016301; F:GO:0016491; F:GO:0043167	F:kinase activity; F:oxidoreductase activity; F:ion binding	EC:1; EC:2.7; EC:2	Oxidoreductases; Transferring phosphorus-containing groups; Transferases	no GO terms	no GO terms
000001F|arrow.g869.t1	GroES-like protein	363	0	93.91	F:GO:0016301; F:GO:0016491; F:GO:0043167	F:kinase activity; F:oxidoreductase activity; F:ion binding	EC:1; EC:2.7; EC:2	Oxidoreductases; Transferring phosphorus-containing groups; Transferases	F:GO:0008270; F:GO:0016491	F:zinc ion binding; F:oxidoreductase activity
000001F|arrow.g870.t1	putative beta-glucosidase D [Aspergillus niger CBS 101883]	905	0	77.26	P:GO:0005975; P:GO:0009056; P:GO:0019748; F:GO:0016798; C:GO:0005576	P:carbohydrate metabolic process; P:catabolic process; P:secondary metabolic process; F:hydrolase activity, acting on glycosyl bonds; C:extracellular region	EC:3.2; EC:3.2.1.21; EC:3; EC:3.2.1	Glycosylases; Beta-glucosidase; Hydrolases; Glycosylases	P:GO:0005975; F:GO:0004553	P:carbohydrate metabolic process; F:hydrolase activity, hydrolyzing O-glycosyl compounds
000001F|arrow.g871.t1	cytochrome P450	1179	0	81.28	F:GO:0016491; F:GO:0043167	F:oxidoreductase activity; F:ion binding	EC:1; EC:1.14	Oxidoreductases; Acting on paired donors, with incorporation or reduction of molecular oxygen. The oxygen incorporated need not be derived from O(2)	F:GO:0005506; F:GO:0016705; F:GO:0020037	F:iron ion binding; F:oxidoreductase activity, acting on paired donors, with incorporation or reduction of molecular oxygen; F:heme binding
000001F|arrow.g872.t1	predicted protein	129	4.61637e-05	72.78					no GO terms	no GO terms
000001F|arrow.g873.t1	Pyruvate/Phosphoenolpyruvate kinase-like domain-containing protein	271	2.39849e-180	86.51	F:GO:0016301	F:kinase activity	EC:2.7; EC:2	Transferring phosphorus-containing groups; Transferases	F:GO:0003824	F:catalytic activity
000001F|arrow.g874.t1	integral membrane protein Pth11-like, putative	326	0	83.91	C:GO:0005575	C:cellular_component			no GO terms	no GO terms
000001F|arrow.g875.t1	predicted protein	473	0	88.95					no GO terms	no GO terms
000001F|arrow.g876.t1	predicted protein	717	0	82.2	C:GO:0005575	C:cellular_component			no GO terms	no GO terms
000001F|arrow.g877.t1	CHAT domain-domain-containing protein	1352	0	74.62	F:GO:0003674	F:molecular_function			F:GO:0005515	F:protein binding
000001F|arrow.g878.t1	predicted protein	317	0	80.84					no IPS match	no IPS match
000001F|arrow.g879.t1	predicted protein	259	7.49784e-126	67.5	F:GO:0022857; C:GO:0005575	F:transmembrane transporter activity; C:cellular_component	EC:7	Translocases	P:GO:0030001; P:GO:0055085; F:GO:0046873; C:GO:0016020	P:metal ion transport; P:transmembrane transport; F:metal ion transmembrane transporter activity; C:membrane
000001F|arrow.g880.t1	hypothetical protein ATETN484_0004079000	146	4.20298e-91	78.84					no GO terms	no GO terms
000001F|arrow.g881.t1	MFS multidrug transporter	519	0	86.79	F:GO:0022857; C:GO:0005886	F:transmembrane transporter activity; C:plasma membrane	EC:7	Translocases	P:GO:0055085; F:GO:0022857; C:GO:0016021	P:transmembrane transport; F:transmembrane transporter activity; C:integral component of membrane
000001F|arrow.g882.t1	LEA domain protein	407	0	79.34	F:GO:0016787	F:hydrolase activity			no GO terms	no GO terms
000001F|arrow.g883.t1	FAD/NAD(P)-binding domain-containing protein	571	0	87	F:GO:0016491; F:GO:0043167	F:oxidoreductase activity; F:ion binding	EC:1	Oxidoreductases	F:GO:0016491	F:oxidoreductase activity
000001F|arrow.g884.t1	fungal-specific transcription factor domain-domain-containing protein	655	0	74.47	P:GO:0009058; P:GO:0034641; F:GO:0003677; F:GO:0043167	P:biosynthetic process; P:cellular nitrogen compound metabolic process; F:DNA binding; F:ion binding			P:GO:0006351; F:GO:0003677; F:GO:0008270	P:transcription, DNA-templated; F:DNA binding; F:zinc ion binding
000001F|arrow.g885.t1	glutathione S-transferase	276	7.82828e-165	86.83	P:GO:0006790; P:GO:0009058; P:GO:0034641; F:GO:0003677; F:GO:0043167	P:sulfur compound metabolic process; P:biosynthetic process; P:cellular nitrogen compound metabolic process; F:DNA binding; F:ion binding	EC:2	Transferases	P:GO:0006749; F:GO:0005515	P:glutathione metabolic process; F:protein binding
000001F|arrow.g886.t1	major facilitator superfamily domain-containing protein	478	0	89.79	F:GO:0022857; C:GO:0005575	F:transmembrane transporter activity; C:cellular_component	EC:7	Translocases	P:GO:0055085; F:GO:0022857	P:transmembrane transport; F:transmembrane transporter activity
000001F|arrow.g887.t1	sugar transporter	538	0	91.86	P:GO:0009058; P:GO:0034641; F:GO:0003677; F:GO:0016491; F:GO:0022857; F:GO:0043167; C:GO:0005886	P:biosynthetic process; P:cellular nitrogen compound metabolic process; F:DNA binding; F:oxidoreductase activity; F:transmembrane transporter activity; F:ion binding; C:plasma membrane	EC:1.1; EC:1; EC:1.1.1; EC:7	Acting on the CH-OH group of donors; Oxidoreductases; Acting on the CH-OH group of donors; Translocases	P:GO:0055085; F:GO:0022857; C:GO:0016020; C:GO:0016021	P:transmembrane transport; F:transmembrane transporter activity; C:membrane; C:integral component of membrane
000001F|arrow.g888.t1	gluconolactonase precursor	312	0	93.9	P:GO:0008150; F:GO:0003674; C:GO:0005575	P:biological_process; F:molecular_function; C:cellular_component			no GO terms	no GO terms
000001F|arrow.g889.t1	D-3-phosphoglycerate dehydrogenase	324	0	92.16	P:GO:0009058; P:GO:0034641; F:GO:0003677; F:GO:0003700; F:GO:0016491; F:GO:0043167	P:biosynthetic process; P:cellular nitrogen compound metabolic process; F:DNA binding; F:DNA-binding transcription factor activity; F:oxidoreductase activity; F:ion binding	EC:1.1; EC:1; EC:3; EC:1.1.1; EC:1.1.1.95	Acting on the CH-OH group of donors; Oxidoreductases; Hydrolases; Acting on the CH-OH group of donors; Phosphoglycerate dehydrogenase	F:GO:0016616; F:GO:0051287	F:oxidoreductase activity, acting on the CH-OH group of donors, NAD or NADP as acceptor; F:NAD binding
000001F|arrow.g890.t1	Zn(II)2Cys6 transcription factor	381	0	76.16	P:GO:0009058; P:GO:0034641; F:GO:0043167	P:biosynthetic process; P:cellular nitrogen compound metabolic process; F:ion binding			no GO terms	no GO terms
000001F|arrow.g891.t1	putative 4-hydroxy-2-oxovalerate aldolase	272	0	94.37	F:GO:0016301; F:GO:0016829	F:kinase activity; F:lyase activity	EC:2.7; EC:2; EC:4	Transferring phosphorus-containing groups; Transferases; Lyases	F:GO:0003824	F:catalytic activity
000001F|arrow.g892.t1	vitamin H transporter	495	0	91.33	F:GO:0022857; C:GO:0005575	F:transmembrane transporter activity; C:cellular_component	EC:7	Translocases	P:GO:0055085; F:GO:0022857	P:transmembrane transport; F:transmembrane transporter activity
000001F|arrow.g893.t1	permease of the major facilitator superfamily	477	0	71.98	F:GO:0022857; C:GO:0005575	F:transmembrane transporter activity; C:cellular_component	EC:7	Translocases	P:GO:0055085; F:GO:0022857	P:transmembrane transport; F:transmembrane transporter activity
000001F|arrow.g894.t1	capsule polysaccharide synthase Cps1	414	0	86.56	C:GO:0005575	C:cellular_component			no GO terms	no GO terms
000001F|arrow.g895.t1	---NA---	129							no GO terms	no GO terms
000001F|arrow.g896.t1	phosphoglycerate mutase	234	4.50449e-166	91.74					no GO terms	no GO terms
000001F|arrow.g897.t1	MFS general substrate transporter	456	0	76.72	F:GO:0022857; C:GO:0005575	F:transmembrane transporter activity; C:cellular_component	EC:7	Translocases	P:GO:0055085; F:GO:0022857	P:transmembrane transport; F:transmembrane transporter activity
000001F|arrow.g898.t1	FMN-linked oxidoreductase	365	0	85.68	F:GO:0016491; F:GO:0043167	F:oxidoreductase activity; F:ion binding	EC:1	Oxidoreductases	F:GO:0003824; F:GO:0010181; F:GO:0016491	F:catalytic activity; F:FMN binding; F:oxidoreductase activity
000001F|arrow.g899.t1	Glycerate kinase	227	3.50991e-64	72.64	P:GO:0044281; F:GO:0016301	P:small molecule metabolic process; F:kinase activity	EC:2.7.1; EC:2.7; EC:2; EC:2.7.1.31	Transferring phosphorus-containing groups; Transferring phosphorus-containing groups; Transferases; Glycerate 3-kinase	P:GO:0031388; F:GO:0008887	P:organic acid phosphorylation; F:glycerate kinase activity
000001F|arrow.g900.t1	ganglioside induced differentiation associated protein	448	0	82.1	P:GO:0006464; F:GO:0016791; F:GO:0016798	P:cellular protein modification process; F:phosphatase activity; F:hydrolase activity, acting on glycosyl bonds	EC:3.2; EC:3.1; EC:2; EC:3; EC:3.1.3	Glycosylases; Acting on ester bonds; Transferases; Hydrolases; Acting on ester bonds	no GO terms	no GO terms
000001F|arrow.g901.t1	putative cyclase-domain-containing protein	312	2.89533e-176	75.98	P:GO:0006520; P:GO:0009056; P:GO:0034641; F:GO:0016810	P:cellular amino acid metabolic process; P:catabolic process; P:cellular nitrogen compound metabolic process; F:hydrolase activity, acting on carbon-nitrogen (but not peptide) bonds	EC:3.5.1; EC:3.5; EC:3; EC:3.5.1.9	Acting on carbon-nitrogen bonds, other than peptide bonds; Acting on carbon-nitrogen bonds, other than peptide bonds; Hydrolases; Arylformamidase	P:GO:0019441; F:GO:0004061	P:tryptophan catabolic process to kynurenine; F:arylformamidase activity
000001F|arrow.g902.t1	Vacuolar basic amino acid transporter 5 [Phialophora attinorum]	592	0	73.88	F:GO:0022857; C:GO:0005575	F:transmembrane transporter activity; C:cellular_component	EC:7	Translocases	P:GO:0055085; F:GO:0022857	P:transmembrane transport; F:transmembrane transporter activity
000001F|arrow.g903.t1	NAD(P)-binding protein	199	1.07362e-85	73.87	F:GO:0016491	F:oxidoreductase activity	EC:1	Oxidoreductases	F:GO:0016491	F:oxidoreductase activity
000001F|arrow.g904.t1	predicted protein	320	0	66.77	F:GO:0003677; C:GO:0000786	F:DNA binding; C:nucleosome			no GO terms	no GO terms
000001F|arrow.g905.t1	predicted protein	809	0	54.89	F:GO:0003674	F:molecular_function			F:GO:0005515	F:protein binding
000001F|arrow.g906.t1	acetyl-CoA synthetase-like protein	537	0	83.24	C:GO:0005575	C:cellular_component			no GO terms	no GO terms
000001F|arrow.g907.t1	putative hydrolases or acyltransferase	411	1.49209e-179	73.93	F:GO:0003674	F:molecular_function	EC:2	Transferases	no GO terms	no GO terms
000001F|arrow.g908.t1	siderophore iron transporter mirB	593	0	89.26	F:GO:0022857; C:GO:0005575	F:transmembrane transporter activity; C:cellular_component	EC:7	Translocases	P:GO:0055085; F:GO:0022857	P:transmembrane transport; F:transmembrane transporter activity
000001F|arrow.g909.t1	P-loop containing nucleoside triphosphate hydrolase protein	1329	0	88.56	F:GO:0016887; F:GO:0022857; F:GO:0043167; C:GO:0005575	F:ATPase activity; F:transmembrane transporter activity; F:ion binding; C:cellular_component	EC:3.6.1; EC:3.6; EC:3; EC:7; EC:7.2.2; EC:3.6.1.15	Acting on acid anhydrides; Acting on acid anhydrides; Hydrolases; Translocases; Catalysing the translocation of inorganic cations; Nucleoside-triphosphate phosphatase	P:GO:0055085; F:GO:0005524; F:GO:0042626; C:GO:0016021	P:transmembrane transport; F:ATP binding; F:ATPase-coupled transmembrane transporter activity; C:integral component of membrane
000001F|arrow.g910.t1	nonribosomal siderophore peptide synthase Sid2	2084	0	77.61	F:GO:0016874	F:ligase activity	EC:6	Ligases	F:GO:0003824; F:GO:0031177	F:catalytic activity; F:phosphopantetheine binding
000001F|arrow.g911.t1	enoyl-CoA hydratase/isomerase family protein	267	4.43604e-160	89.35	P:GO:0006629; P:GO:0006950; P:GO:0009058; P:GO:0019748; P:GO:0042592; P:GO:0044281; F:GO:0016829; F:GO:0016853; C:GO:0005777	P:lipid metabolic process; P:response to stress; P:biosynthetic process; P:secondary metabolic process; P:homeostatic process; P:small molecule metabolic process; F:lyase activity; F:isomerase activity; C:peroxisome	EC:4; EC:5	Lyases; Isomerases	F:GO:0003824	F:catalytic activity
000001F|arrow.g912.t1	putative siderophore biosynthesis acetylase AceI	458	0	89.87	P:GO:0006629; P:GO:0009058; P:GO:0019748; P:GO:0034641; P:GO:0044281; F:GO:0016746; C:GO:0005777	P:lipid metabolic process; P:biosynthetic process; P:secondary metabolic process; P:cellular nitrogen compound metabolic process; P:small molecule metabolic process; F:transferase activity, transferring acyl groups; C:peroxisome	EC:2.3; EC:2; EC:2.3.1	Acyltransferases; Transferases; Acyltransferases	P:GO:0019290; F:GO:0016746	P:siderophore biosynthetic process; F:transferase activity, transferring acyl groups
000001F|arrow.g913.t1	DUF1749-domain-containing protein	355	0	87.85					no GO terms	no GO terms
000001F|arrow.g914.t1	uncharacterized transcriptional regulatory protein C3C7.04	724	0	68.1	P:GO:0009058; P:GO:0034641; F:GO:0003677; F:GO:0043167	P:biosynthetic process; P:cellular nitrogen compound metabolic process; F:DNA binding; F:ion binding			P:GO:0006351; F:GO:0003677; F:GO:0008270	P:transcription, DNA-templated; F:DNA binding; F:zinc ion binding
000001F|arrow.g915.t1	hypothetical protein ATETN484_0007008700	75	3.79035e-42	91.47					no GO terms	no GO terms
000001F|arrow.g916.t1	NAD(P)-binding protein	598	0	93.55					no GO terms	no GO terms
000001F|arrow.g917.t1	hypothetical protein BA78_7804	803	0	75.22	F:GO:0005524; F:GO:0016887	F:ATP binding; F:ATPase activity			no GO terms	no GO terms
000001F|arrow.g918.t1	predicted protein	165	2.2996e-96	69.4					no GO terms	no GO terms
000001F|arrow.g919.t1	predicted protein	400	0	67.59	P:GO:0009058; P:GO:0034641; F:GO:0003674	P:biosynthetic process; P:cellular nitrogen compound metabolic process; F:molecular_function			no IPS match	no IPS match
000001F|arrow.g920.t1	flavin-binding monooxygenase	931	0	91.14	F:GO:0016491	F:oxidoreductase activity	EC:1	Oxidoreductases	no GO terms	no GO terms
000001F|arrow.g921.t1	probable beta-glucosidase G	817	0	93.93	P:GO:0005975; P:GO:0009056; F:GO:0016798; C:GO:0005576	P:carbohydrate metabolic process; P:catabolic process; F:hydrolase activity, acting on glycosyl bonds; C:extracellular region	EC:3.2; EC:3.2.1.21; EC:3; EC:3.2.1	Glycosylases; Beta-glucosidase; Hydrolases; Glycosylases	P:GO:0005975; F:GO:0004553	P:carbohydrate metabolic process; F:hydrolase activity, hydrolyzing O-glycosyl compounds
000001F|arrow.g922.t1	predicted protein	476	0	77.19					no GO terms	no GO terms
000001F|arrow.g923.t1	boletus edulis lectin	147	5.01331e-81	79.29	F:GO:0003674	F:molecular_function			no GO terms	no GO terms
000001F|arrow.g924.t1	hypothetical protein ATETN484_0004081700	985	0	80.85	F:GO:0003674	F:molecular_function	EC:3	Hydrolases	F:GO:0016787	F:hydrolase activity
000001F|arrow.g925.t1	hypothetical protein CNMCM5878_006091	341	0	74	P:GO:0008150; F:GO:0003674; C:GO:0005575	P:biological_process; F:molecular_function; C:cellular_component			no GO terms	no GO terms
000001F|arrow.g926.t1	F-box domain protein	471	0	85.11	F:GO:0003674	F:molecular_function			F:GO:0005515	F:protein binding
000001F|arrow.g927.t1	uncharacterized protein IFM58399_09976	335	0	73.64					no GO terms	no GO terms
000001F|arrow.g928.t1	glucan 1,3-beta-glucosidase	1184	0	93.47	C:GO:0005576	C:extracellular region			no GO terms	no GO terms
000001F|arrow.g929.t1	predicted protein	200	2.18158e-134	85.79	F:GO:0003674	F:molecular_function	EC:3	Hydrolases	no GO terms	no GO terms
000001F|arrow.g930.t1	lovastatin diketide synthase LovF	158	2.92377e-58	63.29	F:GO:0003674; C:GO:0005575	F:molecular_function; C:cellular_component			no GO terms	no GO terms
000001F|arrow.g931.t1	periplasmic beta-glucosidase precursor	726	0	88.8	P:GO:0005975; P:GO:0009056; F:GO:0016798	P:carbohydrate metabolic process; P:catabolic process; F:hydrolase activity, acting on glycosyl bonds	EC:3.2; EC:3; EC:3.2.1	Glycosylases; Hydrolases; Glycosylases	P:GO:0005975; F:GO:0004553	P:carbohydrate metabolic process; F:hydrolase activity, hydrolyzing O-glycosyl compounds
000001F|arrow.g932.t1	adaptin N terminal region-domain-containing protein	1020	0	95.38	P:GO:0015031; P:GO:0016192; F:GO:0030674; C:GO:0005886; C:GO:0031410; C:GO:0032991	P:protein transport; P:vesicle-mediated transport; F:protein-macromolecule adaptor activity; C:plasma membrane; C:cytoplasmic vesicle; C:protein-containing complex			P:GO:0006886; P:GO:0015031; P:GO:0016192; P:GO:0072583; F:GO:0035615; C:GO:0030117; C:GO:0030122; C:GO:0030131	P:intracellular protein transport; P:protein transport; P:vesicle-mediated transport; P:clathrin-dependent endocytosis; F:clathrin adaptor activity; C:membrane coat; C:AP-2 adaptor complex; C:clathrin adaptor complex
000001F|arrow.g933.t1	copper resistance protein Crd2	109	2.05979e-62	91.06					no GO terms	no GO terms
000001F|arrow.g934.t1	homeobox transcription factor	553	0	78.88	F:GO:0003677	F:DNA binding			F:GO:0003677	F:DNA binding
000001F|arrow.g935.t1	THO complex subunit Tho1	662	0	87.63					no GO terms	no GO terms
000001F|arrow.g936.t1	P-loop containing nucleoside triphosphate hydrolase protein	1530	0	94.61	P:GO:0006397; F:GO:0004386; C:GO:0005634; C:GO:0032991	P:mRNA processing; F:helicase activity; C:nucleus; C:protein-containing complex	EC:3.6.1; EC:3.6; EC:3; EC:3.6.1.15	Acting on acid anhydrides; Acting on acid anhydrides; Hydrolases; Nucleoside-triphosphate phosphatase	P:GO:0000398; F:GO:0004386; C:GO:0005681	P:mRNA splicing, via spliceosome; F:helicase activity; C:spliceosomal complex
000001F|arrow.g937.t1	predicted protein	410	1.76575e-159	75.29	P:GO:0008150; F:GO:0003674; C:GO:0005575	P:biological_process; F:molecular_function; C:cellular_component			no GO terms	no GO terms
000001F|arrow.g938.t1	putative TFIIH and nucleotide excision repair factor 3 complexes subunit	478	0	95.65	P:GO:0006259; P:GO:0006950; F:GO:0030234; C:GO:0005634; C:GO:0032991	P:DNA metabolic process; P:response to stress; F:enzyme regulator activity; C:nucleus; C:protein-containing complex			P:GO:0006289; F:GO:0001671; C:GO:0000439	P:nucleotide-excision repair; F:ATPase activator activity; C:transcription factor TFIIH core complex
000001F|arrow.g939.t1	putative esterase C31F10.02	157	3.03859e-107	96.72	F:GO:0016853	F:isomerase activity	EC:3.1; EC:2; EC:3; EC:5; EC:3.1.2.20; EC:3.1.2	Acting on ester bonds; Transferases; Hydrolases; Isomerases; Acyl-CoA hydrolase; Acting on ester bonds	F:GO:0047617	F:acyl-CoA hydrolase activity
000001F|arrow.g940.t1	predicted protein	292	4.34726e-167	70.3	C:GO:0016020; C:GO:0016021	C:membrane; C:integral component of membrane			no GO terms	no GO terms
000001F|arrow.g941.t1	hypothetical protein BO94DRAFT_575108	240	1.3965e-08	43.8					no IPS match	no IPS match
000001F|arrow.g942.t1	topoisomerase 1-associated factor 1	1142	0	85.17	P:GO:0000003; P:GO:0006259; P:GO:0006950; P:GO:0007049; P:GO:0009058; F:GO:0016853	P:reproduction; P:DNA metabolic process; P:response to stress; P:cell cycle; P:biosynthetic process; F:isomerase activity	EC:5	Isomerases	no GO terms	no GO terms
000001F|arrow.g943.t1	3-hydroxybutyryl-CoA dehydrogenase	319	0	97.52	P:GO:0006629; P:GO:0044281; F:GO:0016491; F:GO:0043167	P:lipid metabolic process; P:small molecule metabolic process; F:oxidoreductase activity; F:ion binding	EC:1.1; EC:1; EC:1.1.1.35; EC:1.1.1	Acting on the CH-OH group of donors; Oxidoreductases; 3-hydroxyacyl-CoA dehydrogenase; Acting on the CH-OH group of donors	P:GO:0006631; F:GO:0016491; F:GO:0016616; F:GO:0070403	P:fatty acid metabolic process; F:oxidoreductase activity; F:oxidoreductase activity, acting on the CH-OH group of donors, NAD or NADP as acceptor; F:NAD+ binding
000001F|arrow.g944.t1	3-Hydroxybutyryl-CoA dehydrogenase	366	0	80.45	P:GO:0006629; P:GO:0007049; P:GO:0044281; F:GO:0016491	P:lipid metabolic process; P:cell cycle; P:small molecule metabolic process; F:oxidoreductase activity	EC:1.1; EC:1; EC:1.1.1.35; EC:1.1.1	Acting on the CH-OH group of donors; Oxidoreductases; 3-hydroxyacyl-CoA dehydrogenase; Acting on the CH-OH group of donors	P:GO:0051726	P:regulation of cell cycle
000001F|arrow.g945.t1	leucine-rich repeat protein	980	0	83.13	F:GO:0003674	F:molecular_function	EC:3	Hydrolases	F:GO:0005515	F:protein binding
000001F|arrow.g946.t1	hypothetical protein ATETN484_0004083900	476	0	83.91					no GO terms	no GO terms
000001F|arrow.g947.t1	ribosomal protein L13e	226	5.95673e-161	95.22	P:GO:0006412; F:GO:0003735; C:GO:0005840	P:translation; F:structural constituent of ribosome; C:ribosome			P:GO:0006412; F:GO:0003735; C:GO:0005840	P:translation; F:structural constituent of ribosome; C:ribosome
000001F|arrow.g948.t1	hypothetical protein ATETN484_0004084100	631	0	68.4					no GO terms	no GO terms
000001F|arrow.g949.t1	oxidoreductase-like protein	279	9.69305e-142	79.42					no GO terms	no GO terms
000001F|arrow.g950.t1	hypothetical protein ATETN484_0004084300	217	1.3378e-104	76.35	P:GO:0008150; F:GO:0003674; C:GO:0005575	P:biological_process; F:molecular_function; C:cellular_component			no GO terms	no GO terms
000001F|arrow.g951.t1	HSF-type DNA-binding-domain-containing protein	585	0	88.17	P:GO:0009058; P:GO:0034641; F:GO:0003677; F:GO:0003700	P:biosynthetic process; P:cellular nitrogen compound metabolic process; F:DNA binding; F:DNA-binding transcription factor activity			P:GO:0006355; F:GO:0000981; F:GO:0003700; F:GO:0043565	P:regulation of transcription, DNA-templated; F:DNA-binding transcription factor activity, RNA polymerase II-specific; F:DNA-binding transcription factor activity; F:sequence-specific DNA binding
000001F|arrow.g952.t1	F-box domain protein	468	0	64.5	F:GO:0003674	F:molecular_function			F:GO:0005515	F:protein binding
000001F|arrow.g953.t1	succinate-CoA ligase	443	0	97.86	P:GO:0006091; P:GO:0006790; P:GO:0034641; P:GO:0044281; F:GO:0016874; F:GO:0043167	P:generation of precursor metabolites and energy; P:sulfur compound metabolic process; P:cellular nitrogen compound metabolic process; P:small molecule metabolic process; F:ligase activity; F:ion binding	EC:6.2.1.5; EC:6.2; EC:6; EC:6.2.1	Succinate--CoA ligase (ADP-forming); Forming carbon-sulfur bonds; Ligases; Forming carbon-sulfur bonds	P:GO:0006099; F:GO:0003824; F:GO:0005524	P:tricarboxylic acid cycle; F:catalytic activity; F:ATP binding
000001F|arrow.g954.t1	short chain dehydrogenase/reductase Ayr1	296	0	91.77	P:GO:0006629; P:GO:0009056; P:GO:0009058; F:GO:0016491; C:GO:0005811	P:lipid metabolic process; P:catabolic process; P:biosynthetic process; F:oxidoreductase activity; C:lipid droplet	EC:1.1; EC:3.1; EC:1; EC:3; EC:1.1.1.101; EC:1.1.1; EC:3.1.1; EC:3.1.1.1; EC:3.1.1.3	Acting on the CH-OH group of donors; Acting on ester bonds; Oxidoreductases; Hydrolases; Acylglycerone-phosphate reductase; Acting on the CH-OH group of donors; Acting on ester bonds; Carboxylesterase; Triacylglycerol lipase	F:GO:0016491	F:oxidoreductase activity
000001F|arrow.g955.t1	C4-dicarboxylate/malic acid transporter	478	0	87.77	P:GO:0034641; P:GO:0044281; F:GO:0016757; F:GO:0022857; C:GO:0005575	P:cellular nitrogen compound metabolic process; P:small molecule metabolic process; F:transferase activity, transferring glycosyl groups; F:transmembrane transporter activity; C:cellular_component	EC:2.4; EC:2; EC:7	Glycosyltransferases; Transferases; Translocases	P:GO:0055085; P:GO:0071423; F:GO:0015140; C:GO:0016021	P:transmembrane transport; P:malate transmembrane transport; F:malate transmembrane transporter activity; C:integral component of membrane
000001F|arrow.g956.t1	xanthine phosphoribosyltransferase 1	204	9.67157e-151	97.4	P:GO:0009058; P:GO:0034641; P:GO:0044281; F:GO:0016757; F:GO:0016853	P:biosynthetic process; P:cellular nitrogen compound metabolic process; P:small molecule metabolic process; F:transferase activity, transferring glycosyl groups; F:isomerase activity	EC:2.4.2; EC:2.4; EC:5.4; EC:2; EC:5.4.2.8; EC:5; EC:2.4.2.8; EC:2.4.2.22; EC:5.4.2	Glycosyltransferases; Glycosyltransferases; Intramolecular transferases; Transferases; Phosphomannomutase; Isomerases; Hypoxanthine phosphoribosyltransferase; Xanthine phosphoribosyltransferase; Intramolecular transferases	P:GO:0009116	P:nucleoside metabolic process
000001F|arrow.g957.t1	dolichol-phosphate mannosyltransferase subunit 3	92	7.26859e-48	87.07	P:GO:0006464; P:GO:0006629; P:GO:0009058; F:GO:0016757; C:GO:0005783; C:GO:0032991	P:cellular protein modification process; P:lipid metabolic process; P:biosynthetic process; F:transferase activity, transferring glycosyl groups; C:endoplasmic reticulum; C:protein-containing complex	EC:2.4; EC:2; EC:2.4.1.83; EC:2.4.1	Glycosyltransferases; Transferases; Dolichyl-phosphate beta-D-mannosyltransferase; Glycosyltransferases	P:GO:0006486	P:protein glycosylation
000001F|arrow.g958.t1	armadillo-type protein	665	0	79.7	F:GO:0030234	F:enzyme regulator activity			P:GO:0043547; F:GO:0005096	P:positive regulation of GTPase activity; F:GTPase activator activity
000001F|arrow.g959.t1	predicted protein	417	0	72	C:GO:0005575	C:cellular_component			no GO terms	no GO terms
000001F|arrow.g960.t1	ubiquinone biosynthesis protein	687	0	91.16	P:GO:0006464; F:GO:0016301; F:GO:0043167; C:GO:0005575	P:cellular protein modification process; F:kinase activity; F:ion binding; C:cellular_component	EC:2.7.1; EC:2.7; EC:2	Transferring phosphorus-containing groups; Transferring phosphorus-containing groups; Transferases	P:GO:0006468; F:GO:0004672; F:GO:0005524	P:protein phosphorylation; F:protein kinase activity; F:ATP binding
000001F|arrow.g961.t1	cytochrome C1 heme lyase	330	0	86.84	F:GO:0016829; F:GO:0043167; C:GO:0005739	F:lyase activity; F:ion binding; C:mitochondrion	EC:4.4; EC:4.4.1.17; EC:4	Carbon-sulfur lyases; Holocytochrome-c synthase; Lyases	F:GO:0004408; C:GO:0005739	F:holocytochrome-c synthase activity; C:mitochondrion
000001F|arrow.g962.t1	tachykinin family protein	564	0	70.79					no GO terms	no GO terms
000001F|arrow.g963.t1	ubiquitin-protein ligase	266	6.00147e-180	92.85	F:GO:0016874; C:GO:0005575	F:ligase activity; C:cellular_component	EC:6	Ligases	no GO terms	no GO terms
000001F|arrow.g964.t1	Yip1-domain-containing protein	516	0	94.86	C:GO:0005575	C:cellular_component			C:GO:0019867	C:outer membrane
000001F|arrow.g965.t1	Yip1-domain-containing protein	316	0	91.61	C:GO:0005575	C:cellular_component			C:GO:0016020	C:membrane
000001F|arrow.g966.t1	ubiquitin fusion degradation protein 1	768	0	83.27	P:GO:0009056	P:catabolic process			P:GO:0006511	P:ubiquitin-dependent protein catabolic process
000001F|arrow.g967.t1	ubiquitin fusion degradation protein	583	0	83.57					no GO terms	no GO terms
000001F|arrow.g968.t1	proteasome regulatory particle subunit Rpt6	389	0	99.79	P:GO:0009056; P:GO:0009058; P:GO:0034641; P:GO:0065003; F:GO:0008134; F:GO:0008233; F:GO:0016887; F:GO:0043167; C:GO:0005634; C:GO:0005829; C:GO:0032991	P:catabolic process; P:biosynthetic process; P:cellular nitrogen compound metabolic process; P:protein-containing complex assembly; F:transcription factor binding; F:peptidase activity; F:ATPase activity; F:ion binding; C:nucleus; C:cytosol; C:protein-containing complex	EC:3.6.1; EC:3.4; EC:3.6; EC:3; EC:3.6.1.15	Acting on acid anhydrides; Acting on peptide bonds (peptidases); Acting on acid anhydrides; Hydrolases; Nucleoside-triphosphate phosphatase	P:GO:0030163; F:GO:0005524; F:GO:0016887; F:GO:0036402; C:GO:0005737	P:protein catabolic process; F:ATP binding; F:ATPase activity; F:proteasome-activating ATPase activity; C:cytoplasm
000001F|arrow.g969.t1	calcium/ hydrogen exchanger	1022	0	88.8	P:GO:0055085; C:GO:0005575	P:transmembrane transport; C:cellular_component			P:GO:0055085; C:GO:0016021	P:transmembrane transport; C:integral component of membrane
000001F|arrow.g970.t1	FGGY-family carbohydrate kinase	612	0	96.53	P:GO:0005975; P:GO:0044281; F:GO:0008135; F:GO:0016301; C:GO:0005737	P:carbohydrate metabolic process; P:small molecule metabolic process; F:translation factor activity, RNA binding; F:kinase activity; C:cytoplasm	EC:2.7.1; EC:2.7; EC:2; EC:2.7.1.47	Transferring phosphorus-containing groups; Transferring phosphorus-containing groups; Transferases; D-ribulokinase	P:GO:0005975; F:GO:0016773	P:carbohydrate metabolic process; F:phosphotransferase activity, alcohol group as acceptor
000001F|arrow.g971.t1	hypothetical protein ATETN484_0004086400	202	3.49298e-101	76.81					no GO terms	no GO terms
000001F|arrow.g972.t1	F-box domain-containing protein	549	0	79.48	F:GO:0003674	F:molecular_function			F:GO:0005515	F:protein binding
000001F|arrow.g973.t1	protein-tyrosine phosphatase-like protein	723	0	78.35	P:GO:0006464; F:GO:0016791	P:cellular protein modification process; F:phosphatase activity	EC:3.1; EC:3.1.3.48; EC:3; EC:3.1.3	Acting on ester bonds; Protein-tyrosine-phosphatase; Hydrolases; Acting on ester bonds	P:GO:0006470; P:GO:0016311; F:GO:0004725; F:GO:0016791	P:protein dephosphorylation; P:dephosphorylation; F:protein tyrosine phosphatase activity; F:phosphatase activity
000001F|arrow.g974.t1	hypothetical protein BDV35DRAFT_359200	1247	6.36619e-163	72.01					no GO terms	no GO terms
000001F|arrow.g975.t1	cytochrome c oxidase assembly protein cox16, mitochondrial	134	6.31008e-88	96.27	P:GO:0007005; P:GO:0065003; C:GO:0005739	P:mitochondrion organization; P:protein-containing complex assembly; C:mitochondrion			C:GO:0031966	C:mitochondrial membrane
000001F|arrow.g976.t1	Nup93/Nic96-domain-containing protein	1026	0	90.9	P:GO:0006913; F:GO:0005198; C:GO:0005635; C:GO:0032991	P:nucleocytoplasmic transport; F:structural molecule activity; C:nuclear envelope; C:protein-containing complex			F:GO:0017056; C:GO:0005643	F:structural constituent of nuclear pore; C:nuclear pore
000001F|arrow.g977.t1	dihydrofolate reductase-like domain-containing protein	638	0	86.37	P:GO:0009058; P:GO:0034641; P:GO:0044281; F:GO:0016491	P:biosynthetic process; P:cellular nitrogen compound metabolic process; P:small molecule metabolic process; F:oxidoreductase activity	EC:1.1; EC:1; EC:1.1.1; EC:1.1.1.193	Acting on the CH-OH group of donors; Oxidoreductases; Acting on the CH-OH group of donors; 5-amino-6-(5-phosphoribosylamino)uracil reductase	P:GO:0009231; F:GO:0008703	P:riboflavin biosynthetic process; F:5-amino-6-(5-phosphoribosylamino)uracil reductase activity
000001F|arrow.g978.t1	Ran exchange factor Prp20/Pim1	523	0	88.37					no GO terms	no GO terms
000001F|arrow.g979.t1	chromosome segregation in meiosis protein 3	289	6.24433e-179	72.64	P:GO:0000003; P:GO:0006259; P:GO:0006950; P:GO:0007049; P:GO:0009058; C:GO:0005634	P:reproduction; P:DNA metabolic process; P:response to stress; P:cell cycle; P:biosynthetic process; C:nucleus			P:GO:0000076; P:GO:0006974; P:GO:0048478; C:GO:0005634	P:DNA replication checkpoint; P:cellular response to DNA damage stimulus; P:replication fork protection; C:nucleus
000001F|arrow.g980.t1	NADH-ubiquinone oxidoreductase 21 kDa subunit	187	2.06622e-138	95.27	C:GO:0005575	C:cellular_component			no GO terms	no GO terms
000001F|arrow.g981.t1	protein kinase	2357	0	83.59	P:GO:0000003; P:GO:0000278; P:GO:0006259; P:GO:0006464; P:GO:0006950; P:GO:0009058; P:GO:0042592; P:GO:0051276; F:GO:0016301; F:GO:0043167; C:GO:0000228; C:GO:0005730; C:GO:0032991	P:reproduction; P:mitotic cell cycle; P:DNA metabolic process; P:cellular protein modification process; P:response to stress; P:biosynthetic process; P:homeostatic process; P:chromosome organization; F:kinase activity; F:ion binding; C:nuclear chromosome; C:nucleolus; C:protein-containing complex	EC:2.7.1; EC:2.7.11; EC:2.7.11.1; EC:2.7; EC:2	Transferring phosphorus-containing groups; Transferring phosphorus-containing groups; Non-specific serine/threonine protein kinase; Transferring phosphorus-containing groups; Transferases	F:GO:0004674; F:GO:0005515; F:GO:0016301	F:protein serine/threonine kinase activity; F:protein binding; F:kinase activity
000001F|arrow.g982.t1	RNA-binding domain-containing protein	249	9.57068e-32	52.62	F:GO:0003674	F:molecular_function			F:GO:0003676	F:nucleic acid binding
000001F|arrow.g983.t1	P-loop containing nucleoside triphosphate hydrolase protein	748	0	88.01	F:GO:0016887; F:GO:0043167	F:ATPase activity; F:ion binding	EC:3.6.1; EC:3.6; EC:3; EC:3.6.1.15	Acting on acid anhydrides; Acting on acid anhydrides; Hydrolases; Nucleoside-triphosphate phosphatase	F:GO:0005524; F:GO:0016887	F:ATP binding; F:ATPase activity
000001F|arrow.g984.t1	ras family-domain-containing protein	206	1.37445e-150	95.92	P:GO:0016192; F:GO:0003924; F:GO:0043167; C:GO:0005815	P:vesicle-mediated transport; F:GTPase activity; F:ion binding; C:microtubule organizing center	EC:3.6.1; EC:3.6; EC:3; EC:3.6.1.15	Acting on acid anhydrides; Acting on acid anhydrides; Hydrolases; Nucleoside-triphosphate phosphatase	F:GO:0003924; F:GO:0005525	F:GTPase activity; F:GTP binding
000001F|arrow.g985.t1	ATP synthase regulation protein NCA2-domain-containing protein	650	0	74.72	C:GO:0005575	C:cellular_component			no GO terms	no GO terms
000001F|arrow.g986.t1	C-4 sterol methyl oxidase	299	0	96.07	P:GO:0006629; P:GO:0009058; F:GO:0016491; F:GO:0043167	P:lipid metabolic process; P:biosynthetic process; F:oxidoreductase activity; F:ion binding	EC:1	Oxidoreductases	P:GO:0008610; F:GO:0005506; F:GO:0016491	P:lipid biosynthetic process; F:iron ion binding; F:oxidoreductase activity
000001F|arrow.g987.t1	actin family	448	0	86.25	P:GO:0051276; C:GO:0005634	P:chromosome organization; C:nucleus			P:GO:0006338; C:GO:0005634	P:chromatin remodeling; C:nucleus
000001F|arrow.g988.t1	S-adenosyl-L-methionine-dependent methyltransferase	260	1.33671e-70	64.67	P:GO:0008150; F:GO:0008168	P:biological_process; F:methyltransferase activity	EC:2.1; EC:2; EC:2.1.1	Transferring one-carbon groups; Transferases; Transferring one-carbon groups	P:GO:0032259; F:GO:0003676; F:GO:0008168	P:methylation; F:nucleic acid binding; F:methyltransferase activity
000001F|arrow.g989.t1	putative aspartic-type endopeptidase opsB	486	0	89.57	F:GO:0008233; C:GO:0005886	F:peptidase activity; C:plasma membrane	EC:3.4.99; EC:3.4.23.1; EC:3.4.23; EC:3.4.23.32; EC:3.4.23.43; EC:3.4.23.20; EC:3.4.23.25; EC:3.4.23.36; EC:3.4.23.4; EC:3.4.23.35; EC:3.4.23.5; EC:3.4.23.34; EC:3.4.23.15; EC:3.4; EC:3	Acting on peptide bonds (peptidases); Pepsin A; Acting on peptide bonds (peptidases); Scytalidopepsin B; Prepilin peptidase; Penicillopepsin; Saccharopepsin; Signal peptidase II; Chymosin; Barrierpepsin; Cathepsin D; Cathepsin E; Renin; Acting on peptide bonds (peptidases); Hydrolases	P:GO:0006508; F:GO:0004190	P:proteolysis; F:aspartic-type endopeptidase activity
000001F|arrow.g990.t1	tryptophan--tRNA ligase	339	0	90.21	P:GO:0006399; P:GO:0006412; P:GO:0006520; F:GO:0003735; F:GO:0016874; F:GO:0043167; C:GO:0005840	P:tRNA metabolic process; P:translation; P:cellular amino acid metabolic process; F:structural constituent of ribosome; F:ligase activity; F:ion binding; C:ribosome	EC:6.1.1.2; EC:6.1; EC:6.1.1; EC:6	Tryptophan--tRNA ligase; Forming carbon-oxygen bonds; Forming carbon-oxygen bonds; Ligases	P:GO:0006418; P:GO:0006436; F:GO:0000166; F:GO:0004812; F:GO:0004830; F:GO:0005524	P:tRNA aminoacylation for protein translation; P:tryptophanyl-tRNA aminoacylation; F:nucleotide binding; F:aminoacyl-tRNA ligase activity; F:tryptophan-tRNA ligase activity; F:ATP binding
000001F|arrow.g991.t1	37 ribosomal protein Rsm10, putative	248	1.3721e-154	81.15	P:GO:0006399; P:GO:0006412; P:GO:0006520; F:GO:0003735; F:GO:0016874; F:GO:0043167; C:GO:0005739; C:GO:0005840; C:GO:0032991	P:tRNA metabolic process; P:translation; P:cellular amino acid metabolic process; F:structural constituent of ribosome; F:ligase activity; F:ion binding; C:mitochondrion; C:ribosome; C:protein-containing complex	EC:6.1.1.2; EC:6.1; EC:6.1.1; EC:6	Tryptophan--tRNA ligase; Forming carbon-oxygen bonds; Forming carbon-oxygen bonds; Ligases	P:GO:0006412; F:GO:0003735; C:GO:0005840	P:translation; F:structural constituent of ribosome; C:ribosome
000001F|arrow.g992.t1	purine nucleoside phosphorylase	309	0	86.05	P:GO:0034641; P:GO:0044281; F:GO:0016757; C:GO:0005737	P:cellular nitrogen compound metabolic process; P:small molecule metabolic process; F:transferase activity, transferring glycosyl groups; C:cytoplasm	EC:2.4.2; EC:2.4.2.1; EC:2.4; EC:2	Glycosyltransferases; Purine-nucleoside phosphorylase; Glycosyltransferases; Transferases	P:GO:0006139; P:GO:0009116; F:GO:0003824; F:GO:0004731	P:nucleobase-containing compound metabolic process; P:nucleoside metabolic process; F:catalytic activity; F:purine-nucleoside phosphorylase activity
000001F|arrow.g993.t1	rRNA-processing protein fcf2	232	2.47066e-140	75.53					no GO terms	no GO terms
000001F|arrow.g994.t1	histone-fold-containing protein	282	0	94.99	P:GO:0009058; P:GO:0034641; F:GO:0003677; F:GO:0003700; C:GO:0005634; C:GO:0032991	P:biosynthetic process; P:cellular nitrogen compound metabolic process; F:DNA binding; F:DNA-binding transcription factor activity; C:nucleus; C:protein-containing complex			P:GO:0006355; F:GO:0003677; F:GO:0003700; F:GO:0046982; C:GO:0016602	P:regulation of transcription, DNA-templated; F:DNA binding; F:DNA-binding transcription factor activity; F:protein heterodimerization activity; C:CCAAT-binding factor complex
000001F|arrow.g995.t1	exocyst complex component Sec15	768	0	95.71	P:GO:0016192; C:GO:0005737; C:GO:0032991	P:vesicle-mediated transport; C:cytoplasm; C:protein-containing complex			P:GO:0006904; C:GO:0000145	P:vesicle docking involved in exocytosis; C:exocyst
000001F|arrow.g996.t1	meiosis protein MEI2	705	0	78.37	F:GO:0003723	F:RNA binding			F:GO:0003676	F:nucleic acid binding
000001F|arrow.g997.t1	predicted protein	205	1.61575e-115	70.04					no GO terms	no GO terms
000001F|arrow.g998.t1	GPI ethanolamine phosphate transferase 2	695	0	79.69	P:GO:0006464; P:GO:0006629; P:GO:0009058; F:GO:0003674; C:GO:0005783	P:cellular protein modification process; P:lipid metabolic process; P:biosynthetic process; F:molecular_function; C:endoplasmic reticulum	EC:2.7; EC:2; EC:2.7.8	Transferring phosphorus-containing groups; Transferases; Transferring phosphorus-containing groups	P:GO:0006506; F:GO:0003824; F:GO:0051377	P:GPI anchor biosynthetic process; F:catalytic activity; F:mannose-ethanolamine phosphotransferase activity
000001F|arrow.g999.t1	predicted protein	132	4.96157e-65	74.83	F:GO:0003674; C:GO:0005575	F:molecular_function; C:cellular_component	EC:2	Transferases	no GO terms	no GO terms
000001F|arrow.g1000.t1	MIZ zinc finger protein	520	0	81.88	P:GO:0006464; F:GO:0043167	P:cellular protein modification process; F:ion binding	EC:2	Transferases	F:GO:0008270	F:zinc ion binding
000001F|arrow.g1001.t1	BET3 family protein	188	7.02321e-129	93.52	P:GO:0016192	P:vesicle-mediated transport			P:GO:0043087; P:GO:0048193	P:regulation of GTPase activity; P:Golgi vesicle transport
000001F|arrow.g1002.t1	malate dehydrogenase, NAD-dependent	329	0	95.52	P:GO:0005975; P:GO:0006091; P:GO:0044281; F:GO:0016491	P:carbohydrate metabolic process; P:generation of precursor metabolites and energy; P:small molecule metabolic process; F:oxidoreductase activity	EC:1.1; EC:1; EC:1.1.1.37; EC:1.1.1	Acting on the CH-OH group of donors; Oxidoreductases; Malate dehydrogenase; Acting on the CH-OH group of donors	P:GO:0005975; P:GO:0006099; P:GO:0019752; F:GO:0003824; F:GO:0016491; F:GO:0016616; F:GO:0030060	P:carbohydrate metabolic process; P:tricarboxylic acid cycle; P:carboxylic acid metabolic process; F:catalytic activity; F:oxidoreductase activity; F:oxidoreductase activity, acting on the CH-OH group of donors, NAD or NADP as acceptor; F:L-malate dehydrogenase activity
000001F|arrow.g1003.t1	60S ribosomal protein L28	153	5.83392e-105	94.51	P:GO:0006412; F:GO:0003735; C:GO:0005840	P:translation; F:structural constituent of ribosome; C:ribosome			P:GO:0006412; F:GO:0003735; C:GO:0005840	P:translation; F:structural constituent of ribosome; C:ribosome
000001F|arrow.g1004.t1	UPF0357 protein AAL017W	124	2.31383e-81	91.21	C:GO:0005575	C:cellular_component			no GO terms	no GO terms
000001F|arrow.g1005.t1	splicing factor 3b subunit 4	325	0	85.39	F:GO:0003723	F:RNA binding			F:GO:0003676	F:nucleic acid binding
000001F|arrow.g1006.t1	mitochondrial carrier	404	0	78.64	P:GO:0006605; P:GO:0007005; F:GO:0022857; C:GO:0005739; C:GO:0032991	P:protein targeting; P:mitochondrion organization; F:transmembrane transporter activity; C:mitochondrion; C:protein-containing complex	EC:7	Translocases	P:GO:0006862; P:GO:0030150; P:GO:0055085; C:GO:0005742	P:nucleotide transport; P:protein import into mitochondrial matrix; P:transmembrane transport; C:mitochondrial outer membrane translocase complex
000001F|arrow.g1007.t1	C2H2 transcription factor	436	0	86.49					no GO terms	no GO terms
000001F|arrow.g1008.t1	transcriptional repressor rco-1	586	0	97.2	F:GO:0003674	F:molecular_function			F:GO:0005515	F:protein binding
000001F|arrow.g1009.t1	C-5 sterol desaturase	352	0	95.85	P:GO:0006629; P:GO:0009058; F:GO:0016491; F:GO:0043167; C:GO:0005575	P:lipid metabolic process; P:biosynthetic process; F:oxidoreductase activity; F:ion binding; C:cellular_component	EC:1	Oxidoreductases	P:GO:0008610; F:GO:0005506; F:GO:0016491	P:lipid biosynthetic process; F:iron ion binding; F:oxidoreductase activity
000001F|arrow.g1010.t1	nuclear cap-binding protein subunit 1	848	0	89.5	P:GO:0006397; P:GO:0006810; F:GO:0003723; C:GO:0032991	P:mRNA processing; P:transport; F:RNA binding; C:protein-containing complex			P:GO:0016070; P:GO:0045292; P:GO:0051028; F:GO:0000339; C:GO:0005846	P:RNA metabolic process; P:mRNA cis splicing, via spliceosome; P:mRNA transport; F:RNA cap binding; C:nuclear cap binding complex
000001F|arrow.g1011.t1	pkinase-domain-containing protein	394	0	99.21	P:GO:0006464; P:GO:0006950; P:GO:0007059; P:GO:0007165; P:GO:0051276; P:GO:0140014; F:GO:0016301; F:GO:0043167	P:cellular protein modification process; P:response to stress; P:chromosome segregation; P:signal transduction; P:chromosome organization; P:mitotic nuclear division; F:kinase activity; F:ion binding	EC:2.7.1; EC:2.7.10; EC:2.7.11; EC:2.7.12.1; EC:2.7; EC:2	Transferring phosphorus-containing groups; Transferring phosphorus-containing groups; Transferring phosphorus-containing groups; Dual-specificity kinase; Transferring phosphorus-containing groups; Transferases	P:GO:0006468; F:GO:0004672; F:GO:0005524	P:protein phosphorylation; F:protein kinase activity; F:ATP binding
000001F|arrow.g1012.t1	eukaryotic porin/Tom40	355	0	98.42	P:GO:0006605; P:GO:0007005; F:GO:0022857; C:GO:0005739; C:GO:0032991	P:protein targeting; P:mitochondrion organization; F:transmembrane transporter activity; C:mitochondrion; C:protein-containing complex	EC:7	Translocases	P:GO:0030150; P:GO:0055085; F:GO:0008320; C:GO:0005741	P:protein import into mitochondrial matrix; P:transmembrane transport; F:protein transmembrane transporter activity; C:mitochondrial outer membrane
000001F|arrow.g1013.t1	6PF2K-domain-containing protein	477	0	87.72	P:GO:0005975; P:GO:0006399; P:GO:0044281; F:GO:0016301; F:GO:0043167; C:GO:0005737; C:GO:0032991	P:carbohydrate metabolic process; P:tRNA metabolic process; P:small molecule metabolic process; F:kinase activity; F:ion binding; C:cytoplasm; C:protein-containing complex	EC:2.7.1; EC:2.7; EC:2; EC:2.7.1.105	Transferring phosphorus-containing groups; Transferring phosphorus-containing groups; Transferases; 6-phosphofructo-2-kinase	P:GO:0006000; P:GO:0006003; F:GO:0003824; F:GO:0003873; F:GO:0005524	P:fructose metabolic process; P:fructose 2,6-bisphosphate metabolic process; F:catalytic activity; F:6-phosphofructo-2-kinase activity; F:ATP binding
000001F|arrow.g1014.t1	ubiquitin-related modifier 1	120	2.36129e-77	87.97	P:GO:0006399; P:GO:0006464; C:GO:0005829	P:tRNA metabolic process; P:cellular protein modification process; C:cytosol	EC:2.8.1.4	tRNA uracil 4-sulfurtransferase	P:GO:0034227; C:GO:0005737	P:tRNA thio-modification; C:cytoplasm
000001F|arrow.g1015.t1	6PF2K-domain-containing protein	806	0	88.54	P:GO:0005975; P:GO:0006399; P:GO:0009058; P:GO:0044281; F:GO:0003677; F:GO:0003700; F:GO:0016301; F:GO:0043167; C:GO:0005737; C:GO:0032991	P:carbohydrate metabolic process; P:tRNA metabolic process; P:biosynthetic process; P:small molecule metabolic process; F:DNA binding; F:DNA-binding transcription factor activity; F:kinase activity; F:ion binding; C:cytoplasm; C:protein-containing complex	EC:2.7.1; EC:2.7; EC:2; EC:2.7.1.105	Transferring phosphorus-containing groups; Transferring phosphorus-containing groups; Transferases; 6-phosphofructo-2-kinase	P:GO:0002098; F:GO:0005515; C:GO:0033588	P:tRNA wobble uridine modification; F:protein binding; C:elongator holoenzyme complex
000001F|arrow.g1016.t1	P-loop containing nucleoside triphosphate hydrolase protein	276	0	94.85	F:GO:0043167	F:ion binding	EC:3	Hydrolases	F:GO:0005524	F:ATP binding
000001F|arrow.g1017.t1	tRNA isopentenyltransferase	455	0	86.67	P:GO:0006399; F:GO:0016765; F:GO:0043167; C:GO:0005737	P:tRNA metabolic process; F:transferase activity, transferring alkyl or aryl (other than methyl) groups; F:ion binding; C:cytoplasm	EC:2.5.1; EC:2.5; EC:2; EC:2.5.1.75	Transferring alkyl or aryl groups, other than methyl groups; Transferring alkyl or aryl groups, other than methyl groups; Transferases; tRNA dimethylallyltransferase	P:GO:0008033; F:GO:0005524; F:GO:0052381	P:tRNA processing; F:ATP binding; F:tRNA dimethylallyltransferase activity
000001F|arrow.g1018.t1	RAI1-domain-containing protein	371	0	93.73					no GO terms	no GO terms
000001F|arrow.g1019.t1	DUF410 domain protein	344	0	93.57	P:GO:0061024; F:GO:0003674	P:membrane organization; F:molecular_function			P:GO:0045048; F:GO:0005515	P:protein insertion into ER membrane; F:protein binding
000001F|arrow.g1020.t1	hypothetical protein ATETN484_0009005600	175	2.05862e-99	81.36	P:GO:0008150; F:GO:0003674; C:GO:0005575	P:biological_process; F:molecular_function; C:cellular_component			no GO terms	no GO terms
000001F|arrow.g1021.t1	replication factor C subunit 4	352	0	98.89	P:GO:0006259; P:GO:0007049; P:GO:0007059; P:GO:0009058; P:GO:0051276; F:GO:0003677; F:GO:0016887; F:GO:0043167; C:GO:0005694; C:GO:0005829; C:GO:0032991	P:DNA metabolic process; P:cell cycle; P:chromosome segregation; P:biosynthetic process; P:chromosome organization; F:DNA binding; F:ATPase activity; F:ion binding; C:chromosome; C:cytosol; C:protein-containing complex	EC:3.6.1; EC:3.6; EC:3; EC:3.6.1.15	Acting on acid anhydrides; Acting on acid anhydrides; Hydrolases; Nucleoside-triphosphate phosphatase	P:GO:0006260; F:GO:0003677; F:GO:0005524; F:GO:0016887	P:DNA replication; F:DNA binding; F:ATP binding; F:ATPase activity
000001F|arrow.g1022.t1	polysaccharide deacetylase family protein	302	0	96.8	P:GO:0005975; F:GO:0016810	P:carbohydrate metabolic process; F:hydrolase activity, acting on carbon-nitrogen (but not peptide) bonds	EC:3.5; EC:3	Acting on carbon-nitrogen bonds, other than peptide bonds; Hydrolases	P:GO:0005975; F:GO:0003824; F:GO:0016810	P:carbohydrate metabolic process; F:catalytic activity; F:hydrolase activity, acting on carbon-nitrogen (but not peptide) bonds
000001F|arrow.g1023.t1	amino acid/polyamine transporter	544	0	89.44	F:GO:0022857; C:GO:0005575	F:transmembrane transporter activity; C:cellular_component	EC:7	Translocases	no GO terms	no GO terms
000001F|arrow.g1024.t1	ankyrin repeat protein	1067	0	74.59	F:GO:0003674	F:molecular_function			F:GO:0005515	F:protein binding
000001F|arrow.g1025.t1	mitochondrial Homoaconitase	788	0	92.76	P:GO:0006520; P:GO:0009058; F:GO:0016491; F:GO:0016829; F:GO:0043167	P:cellular amino acid metabolic process; P:biosynthetic process; F:oxidoreductase activity; F:lyase activity; F:ion binding	EC:4.2.1; EC:1; EC:4.2; EC:4; EC:4.2.1.36	Carbon-oxygen lyases; Oxidoreductases; Carbon-oxygen lyases; Lyases; Homoaconitate hydratase	P:GO:0009085; F:GO:0004409; F:GO:0051539	P:lysine biosynthetic process; F:homoaconitate hydratase activity; F:4 iron, 4 sulfur cluster binding
000001F|arrow.g1026.t1	oxidoreductase, FAD-binding family protein [Aspergillus nomiae NRRL 13137]	377	0	80.68	F:GO:0016491	F:oxidoreductase activity	EC:1	Oxidoreductases	F:GO:0016491	F:oxidoreductase activity
000001F|arrow.g1027.t1	amino acid permease-domain-containing protein	613	0	93.04	F:GO:0022857; C:GO:0005575	F:transmembrane transporter activity; C:cellular_component	EC:7	Translocases	P:GO:0055085; F:GO:0022857; C:GO:0016020	P:transmembrane transport; F:transmembrane transporter activity; C:membrane
000001F|arrow.g1028.t1	general substrate transporter	540	0	84.06	F:GO:0022857; C:GO:0005886	F:transmembrane transporter activity; C:plasma membrane	EC:7	Translocases	P:GO:0055085; F:GO:0022857; C:GO:0016020; C:GO:0016021	P:transmembrane transport; F:transmembrane transporter activity; C:membrane; C:integral component of membrane
000001F|arrow.g1029.t1	C6 transcription factor	720	0	83.3	P:GO:0009058; P:GO:0034641; F:GO:0003677; F:GO:0003700; F:GO:0043167; C:GO:0005575	P:biosynthetic process; P:cellular nitrogen compound metabolic process; F:DNA binding; F:DNA-binding transcription factor activity; F:ion binding; C:cellular_component			P:GO:0006351; P:GO:0006355; F:GO:0000981; F:GO:0003677; F:GO:0008270	P:transcription, DNA-templated; P:regulation of transcription, DNA-templated; F:DNA-binding transcription factor activity, RNA polymerase II-specific; F:DNA binding; F:zinc ion binding
000001F|arrow.g1030.t1	GTP-binding protein TrmE N-terminus-domain-containing protein	605	0	86.7	P:GO:0006399; P:GO:0007010; F:GO:0003924; F:GO:0008092; F:GO:0043167	P:tRNA metabolic process; P:cytoskeleton organization; F:GTPase activity; F:cytoskeletal protein binding; F:ion binding	EC:3.6.1; EC:3.6; EC:3; EC:3.6.1.15	Acting on acid anhydrides; Acting on acid anhydrides; Hydrolases; Nucleoside-triphosphate phosphatase	P:GO:0006400; F:GO:0003924; F:GO:0005515; F:GO:0005525	P:tRNA modification; F:GTPase activity; F:protein binding; F:GTP binding
000001F|arrow.g1031.t1	cytokinesis protein sepA	1802	0	81.43	P:GO:0006399; P:GO:0007010; F:GO:0003924; F:GO:0008092; F:GO:0019899; F:GO:0043167	P:tRNA metabolic process; P:cytoskeleton organization; F:GTPase activity; F:cytoskeletal protein binding; F:enzyme binding; F:ion binding	EC:3.6.1; EC:3.6; EC:3; EC:3.6.1.15	Acting on acid anhydrides; Acting on acid anhydrides; Hydrolases; Nucleoside-triphosphate phosphatase	P:GO:0016043; P:GO:0030036; F:GO:0003779; F:GO:0031267	P:cellular component organization; P:actin cytoskeleton organization; F:actin binding; F:small GTPase binding
000001F|arrow.g1032.t1	conserved hypothetical protein	145	9.43135e-89	87.38	C:GO:0005575	C:cellular_component			no GO terms	no GO terms
000001F|arrow.g1033.t1	formate dehydrogenase	418	0	97.47	P:GO:0009056; P:GO:0044281; F:GO:0016491; C:GO:0005737; C:GO:0032991	P:catabolic process; P:small molecule metabolic process; F:oxidoreductase activity; C:cytoplasm; C:protein-containing complex	EC:1.2; EC:1.1; EC:1; EC:1.1.1; EC:1.17.1.9; EC:1.2.1	Acting on the aldehyde or oxo group of donors; Acting on the CH-OH group of donors; Oxidoreductases; Acting on the CH-OH group of donors; Formate dehydrogenase; Acting on the aldehyde or oxo group of donors	F:GO:0008863; F:GO:0016616; F:GO:0051287	F:formate dehydrogenase (NAD+) activity; F:oxidoreductase activity, acting on the CH-OH group of donors, NAD or NADP as acceptor; F:NAD binding
000001F|arrow.g1034.t1	leucyl-tRNA synthetase	983	0	87.21	P:GO:0006399; P:GO:0006412; P:GO:0006520; F:GO:0016874; F:GO:0043167	P:tRNA metabolic process; P:translation; P:cellular amino acid metabolic process; F:ligase activity; F:ion binding	EC:3.1; EC:6.1; EC:6.1.1.4; EC:3; EC:6.1.1; EC:6; EC:3.1.1; EC:3.1.1.1	Acting on ester bonds; Forming carbon-oxygen bonds; Leucine--tRNA ligase; Hydrolases; Forming carbon-oxygen bonds; Ligases; Acting on ester bonds; Carboxylesterase	P:GO:0006418; P:GO:0006429; F:GO:0000166; F:GO:0002161; F:GO:0004812; F:GO:0004823; F:GO:0005524	P:tRNA aminoacylation for protein translation; P:leucyl-tRNA aminoacylation; F:nucleotide binding; F:aminoacyl-tRNA editing activity; F:aminoacyl-tRNA ligase activity; F:leucine-tRNA ligase activity; F:ATP binding
000001F|arrow.g1035.t1	putative zinc-binding dehydrogenase family oxidoreductase	347	0	84.45	F:GO:0016491	F:oxidoreductase activity	EC:1	Oxidoreductases	F:GO:0016491	F:oxidoreductase activity
000001F|arrow.g1036.t1	allantoinase [Aspergillus nomiae NRRL 13137]	506	0	94.33	P:GO:0009056; P:GO:0034641; F:GO:0016810; F:GO:0043167	P:catabolic process; P:cellular nitrogen compound metabolic process; F:hydrolase activity, acting on carbon-nitrogen (but not peptide) bonds; F:ion binding	EC:3.5.2; EC:3.5; EC:3; EC:3.5.2.5	Acting on carbon-nitrogen bonds, other than peptide bonds; Acting on carbon-nitrogen bonds, other than peptide bonds; Hydrolases; Allantoinase	F:GO:0016787; F:GO:0016810; F:GO:0016812	F:hydrolase activity; F:hydrolase activity, acting on carbon-nitrogen (but not peptide) bonds; F:hydrolase activity, acting on carbon-nitrogen (but not peptide) bonds, in cyclic amides
000001F|arrow.g1037.t1	predicted protein	317	1.67269e-147	74.14	P:GO:0065003; C:GO:0005783	P:protein-containing complex assembly; C:endoplasmic reticulum			P:GO:0070072	P:vacuolar proton-transporting V-type ATPase complex assembly
000001F|arrow.g1038.t1	Prefoldin subunit-domain-containing protein	197	1.47341e-142	90.38	P:GO:0006457; P:GO:0065003; F:GO:0008092; C:GO:0005737; C:GO:0032991	P:protein folding; P:protein-containing complex assembly; F:cytoskeletal protein binding; C:cytoplasm; C:protein-containing complex			P:GO:0006457; C:GO:0016272	P:protein folding; C:prefoldin complex
000001F|arrow.g1039.t1	sterol 3-beta-glucosyltransferase	1409	0	86.89	P:GO:0000003; P:GO:0005975; P:GO:0006629; P:GO:0006914; P:GO:0007049; P:GO:0009058; P:GO:0015031; P:GO:0022607; P:GO:0030154; P:GO:0048646; P:GO:0061024; F:GO:0016757; C:GO:0005737	P:reproduction; P:carbohydrate metabolic process; P:lipid metabolic process; P:autophagy; P:cell cycle; P:biosynthetic process; P:protein transport; P:cellular component assembly; P:cell differentiation; P:anatomical structure formation involved in morphogenesis; P:membrane organization; F:transferase activity, transferring glycosyl groups; C:cytoplasm	EC:2.4.1.173; EC:2.4; EC:2; EC:2.4.1	Sterol 3-beta-glucosyltransferase; Glycosyltransferases; Transferases; Glycosyltransferases	P:GO:0005975; P:GO:0030259; F:GO:0016758	P:carbohydrate metabolic process; P:lipid glycosylation; F:transferase activity, transferring hexosyl groups
000001F|arrow.g1040.t1	DNA-directed RNA polymerase I subunit RPA34.5-domain-containing protein	327	6.95306e-152	81.19	P:GO:0009058; P:GO:0034641; F:GO:0016779	P:biosynthetic process; P:cellular nitrogen compound metabolic process; F:nucleotidyltransferase activity	EC:2.7; EC:2; EC:2.7.7; EC:2.7.7.6	Transferring phosphorus-containing groups; Transferases; Transferring phosphorus-containing groups; DNA-directed RNA polymerase	P:GO:0006360	P:transcription by RNA polymerase I
000001F|arrow.g1041.t1	polynucleotide 5'-hydroxyl-kinase grc3	815	0	84.34	P:GO:0034641; P:GO:0042254; F:GO:0016301; F:GO:0043167; C:GO:0005730	P:cellular nitrogen compound metabolic process; P:ribosome biogenesis; F:kinase activity; F:ion binding; C:nucleolus	EC:2.7.1; EC:2.7; EC:2	Transferring phosphorus-containing groups; Transferring phosphorus-containing groups; Transferases	no GO terms	no GO terms
000001F|arrow.g1042.t1	vesicle coat protein	458	0	90.67					no GO terms	no GO terms
000001F|arrow.g1043.t1	predicted protein	1038	0	72.86	C:GO:0005575	C:cellular_component			no GO terms	no GO terms
000001F|arrow.g1044.t1	glutathione S-transferase	219	4.19346e-118	86.37	P:GO:0006790; P:GO:0034641; F:GO:0016765	P:sulfur compound metabolic process; P:cellular nitrogen compound metabolic process; F:transferase activity, transferring alkyl or aryl (other than methyl) groups	EC:2.5.1; EC:2.5.1.18; EC:2.5; EC:2	Transferring alkyl or aryl groups, other than methyl groups; Glutathione transferase; Transferring alkyl or aryl groups, other than methyl groups; Transferases	P:GO:0006749; F:GO:0005515	P:glutathione metabolic process; F:protein binding
000001F|arrow.g1045.t1	nuclear condensin complex subunit Smc4, putative	1447	0	93.24	P:GO:0007059; P:GO:0051276; P:GO:0051301; P:GO:0140014; F:GO:0016887; F:GO:0043167; C:GO:0005694	P:chromosome segregation; P:chromosome organization; P:cell division; P:mitotic nuclear division; F:ATPase activity; F:ion binding; C:chromosome	EC:3.6.1; EC:3.6; EC:3; EC:3.6.1.15	Acting on acid anhydrides; Acting on acid anhydrides; Hydrolases; Nucleoside-triphosphate phosphatase	P:GO:0051276; F:GO:0005515; F:GO:0005524; F:GO:0016887; C:GO:0005694	P:chromosome organization; F:protein binding; F:ATP binding; F:ATPase activity; C:chromosome
000001F|arrow.g1046.t1	nuclear pore complex assembly-domain-containing protein	318	0	92.2	F:GO:0043167	F:ion binding			no GO terms	no GO terms
000001F|arrow.g1047.t1	CCCH zinc finger domain protein	565	0	77.44	F:GO:0043167	F:ion binding			F:GO:0046872	F:metal ion binding
000001F|arrow.g1048.t1	ribosomal protein S10	116	1.65273e-79	99.74	P:GO:0006412; F:GO:0003723; F:GO:0003735; C:GO:0005840; C:GO:0032991	P:translation; F:RNA binding; F:structural constituent of ribosome; C:ribosome; C:protein-containing complex			P:GO:0006412; F:GO:0003723; F:GO:0003735; C:GO:0005840; C:GO:0015935	P:translation; F:RNA binding; F:structural constituent of ribosome; C:ribosome; C:small ribosomal subunit
000001F|arrow.g1049.t1	CUE domain protein, putative	703	0	81.97	F:GO:0032182	F:ubiquitin-like protein binding			F:GO:0005515; F:GO:0043130	F:protein binding; F:ubiquitin binding
000001F|arrow.g1050.t1	fatty acid desaturase-domain-containing protein	557	0	93.28	P:GO:0006629; F:GO:0016491; C:GO:0005575	P:lipid metabolic process; F:oxidoreductase activity; C:cellular_component	EC:1	Oxidoreductases	P:GO:0006629; F:GO:0016491; C:GO:0016021	P:lipid metabolic process; F:oxidoreductase activity; C:integral component of membrane
000001F|arrow.g1051.t1	phosphoglucomutase	594	0	91.75	P:GO:0005975; F:GO:0016853; F:GO:0043167	P:carbohydrate metabolic process; F:isomerase activity; F:ion binding	EC:5.4; EC:5; EC:5.4.2	Intramolecular transferases; Isomerases; Intramolecular transferases	P:GO:0005975; P:GO:0071704; F:GO:0000287; F:GO:0016868	P:carbohydrate metabolic process; P:organic substance metabolic process; F:magnesium ion binding; F:intramolecular transferase activity, phosphotransferases
000001F|arrow.g1052.t1	---NA---	250							no GO terms	no GO terms
000001F|arrow.g1053.t1	dihydrolipoyl dehydrogenase, mitochondrial precursor	529	0	94.5	P:GO:0006520; P:GO:0009056; P:GO:0009058; P:GO:0042592; F:GO:0016491; F:GO:0043167; C:GO:0005739; C:GO:0032991	P:cellular amino acid metabolic process; P:catabolic process; P:biosynthetic process; P:homeostatic process; F:oxidoreductase activity; F:ion binding; C:mitochondrion; C:protein-containing complex	EC:1.2; EC:1.8.1; EC:1.4; EC:1.4.4; EC:1.6; EC:1; EC:1.8; EC:1.8.1.4; EC:1.2.4; EC:1.2.4.2; EC:1.4.4.2	Acting on the aldehyde or oxo group of donors; Acting on a sulfur group of donors; Acting on the CH-NH(2) group of donors; Acting on the CH-NH(2) group of donors; Acting on NADH or NADPH; Oxidoreductases; Acting on a sulfur group of donors; Dihydrolipoyl dehydrogenase; Acting on the aldehyde or oxo group of donors; Oxoglutarate dehydrogenase (succinyl-transferring); Glycine dehydrogenase (aminome…	P:GO:0045454; F:GO:0004148; F:GO:0016491; F:GO:0016668; F:GO:0050660	P:cell redox homeostasis; F:dihydrolipoyl dehydrogenase activity; F:oxidoreductase activity; F:oxidoreductase activity, acting on a sulfur group of donors, NAD(P) as acceptor; F:flavin adenine dinucleotide binding
000001F|arrow.g1054.t1	---NA---	94							no GO terms	no GO terms
000001F|arrow.g1055.t1	general substrate transporter	552	0	96.19	F:GO:0022857; C:GO:0005886	F:transmembrane transporter activity; C:plasma membrane	EC:7	Translocases	P:GO:0055085; F:GO:0022857; C:GO:0016020; C:GO:0016021	P:transmembrane transport; F:transmembrane transporter activity; C:membrane; C:integral component of membrane
000001F|arrow.g1056.t1	methylated-DNA--protein-cysteine methyltransferase	133	2.33917e-72	81.64	P:GO:0006259; P:GO:0006950; F:GO:0008168	P:DNA metabolic process; P:response to stress; F:methyltransferase activity	EC:2.1; EC:2; EC:2.1.1.63; EC:2.1.1	Transferring one-carbon groups; Transferases; Methylated-DNA--[protein]-cysteine S-methyltransferase; Transferring one-carbon groups	P:GO:0006281; F:GO:0003824; F:GO:0003908	P:DNA repair; F:catalytic activity; F:methylated-DNA-[protein]-cysteine S-methyltransferase activity
000001F|arrow.g1057.t1	C2H2 finger domain protein	220	8.93136e-109	69.62	C:GO:0005634	C:nucleus			no GO terms	no GO terms
000001F|arrow.g1058.t1	Not1 N-terminal domain, CCR4-Not complex component-domain-containing protein	614	0	92.16	P:GO:0009058; P:GO:0034641; C:GO:0005634; C:GO:0005737; C:GO:0032991	P:biosynthetic process; P:cellular nitrogen compound metabolic process; C:nucleus; C:cytoplasm; C:protein-containing complex			P:GO:0006355; C:GO:0005634; C:GO:0030015	P:regulation of transcription, DNA-templated; C:nucleus; C:CCR4-NOT core complex
000001F|arrow.g1059.t1	COG1490 domain protein	213	4.45184e-142	84.88	P:GO:0006399; F:GO:0003723; C:GO:0005737	P:tRNA metabolic process; F:RNA binding; C:cytoplasm	EC:3.1; EC:3; EC:3.1.1.96; EC:3.1.1; EC:3.1.1.1	Acting on ester bonds; Hydrolases; D-aminoacyl-tRNA deacylase; Acting on ester bonds; Carboxylesterase	F:GO:0002161; F:GO:0051499; C:GO:0005737	F:aminoacyl-tRNA editing activity; F:D-aminoacyl-tRNA deacylase activity; C:cytoplasm
000001F|arrow.g1060.t1	peptidyl-prolyl cis-trans isomerase D	373	0	93.67	P:GO:0006457; P:GO:0006464; F:GO:0016853	P:protein folding; P:cellular protein modification process; F:isomerase activity	EC:5.2.1.8; EC:5.2; EC:5	Peptidylprolyl isomerase; Cis-trans-isomerases; Isomerases	P:GO:0000413; P:GO:0006457; F:GO:0003755; F:GO:0005515	P:protein peptidyl-prolyl isomerization; P:protein folding; F:peptidyl-prolyl cis-trans isomerase activity; F:protein binding
000001F|arrow.g1061.t1	major facilitator superfamily domain-containing protein	532	0	87.93	F:GO:0022857; C:GO:0005575	F:transmembrane transporter activity; C:cellular_component	EC:7	Translocases	P:GO:0055085; F:GO:0022857	P:transmembrane transport; F:transmembrane transporter activity
000001F|arrow.g1062.t1	fructosyl amine:oxygen oxidoreductase	388	0	92.5	F:GO:0016491	F:oxidoreductase activity	EC:1.5.3; EC:1.5; EC:1	Acting on the CH-NH group of donors; Acting on the CH-NH group of donors; Oxidoreductases	F:GO:0016491	F:oxidoreductase activity
000001F|arrow.g1063.t1	formamidase FmdS	411	0	98.03	F:GO:0016810; C:GO:0005575	F:hydrolase activity, acting on carbon-nitrogen (but not peptide) bonds; C:cellular_component	EC:3.5.1; EC:3.5; EC:3; EC:3.5.1.49	Acting on carbon-nitrogen bonds, other than peptide bonds; Acting on carbon-nitrogen bonds, other than peptide bonds; Hydrolases; Formamidase	F:GO:0016811	F:hydrolase activity, acting on carbon-nitrogen (but not peptide) bonds, in linear amides
000001F|arrow.g1064.t1	predicted protein	464	0	67.13					no GO terms	no GO terms
000001F|arrow.g1065.t1	nuclear protein (Sgd1)	860	0	86.59	F:GO:0008135	F:translation factor activity, RNA binding			F:GO:0003723; F:GO:0005515	F:RNA binding; F:protein binding
000001F|arrow.g1066.t1	signal recognition particle, SRP14 subunit	134	1.59515e-65	86.29	P:GO:0006605; F:GO:0003723; C:GO:0005737; C:GO:0032991	P:protein targeting; F:RNA binding; C:cytoplasm; C:protein-containing complex			P:GO:0006614; F:GO:0008312; F:GO:0030942; C:GO:0005786; C:GO:0048500	P:SRP-dependent cotranslational protein targeting to membrane; F:7S RNA binding; F:endoplasmic reticulum signal peptide binding; C:signal recognition particle, endoplasmic reticulum targeting; C:signal recognition particle
000001F|arrow.g1067.t1	inheritance of peroxisomes protein 1-domain-containing protein	548	0	80.29	P:GO:0008150; C:GO:0005777	P:biological_process; C:peroxisome			P:GO:0045033; C:GO:0005780	P:peroxisome inheritance; C:extrinsic component of intraperoxisomal membrane
000001F|arrow.g1068.t1	transmembrane protein UsgS	363	0	90.61	C:GO:0005575	C:cellular_component			no GO terms	no GO terms
000001F|arrow.g1069.t1	conserved hypothetical protein	549	0	88.04	P:GO:0009058; P:GO:0034641; F:GO:0003677; F:GO:0003700; F:GO:0043167; C:GO:0005575	P:biosynthetic process; P:cellular nitrogen compound metabolic process; F:DNA binding; F:DNA-binding transcription factor activity; F:ion binding; C:cellular_component			P:GO:0006351; F:GO:0003677; F:GO:0008270	P:transcription, DNA-templated; F:DNA binding; F:zinc ion binding
000001F|arrow.g1070.t1	GPR1/FUN34/yaaH family-domain-containing protein	243	1.38085e-107	91.07	C:GO:0005575	C:cellular_component			C:GO:0016021	C:integral component of membrane
000001F|arrow.g1071.t1	fumarylacetoacetate hydrolase	582	0	94.55	F:GO:0003674	F:molecular_function	EC:3	Hydrolases	F:GO:0003824	F:catalytic activity
000001F|arrow.g1072.t1	cytochrome b5-like heme/steroid binding domain-containing protein	144	1.09481e-74	75.8	F:GO:0003674	F:molecular_function			F:GO:0020037	F:heme binding
000001F|arrow.g1073.t1	Amidohydrolase family protein	486	0	95.97	F:GO:0016810	F:hydrolase activity, acting on carbon-nitrogen (but not peptide) bonds	EC:3.5; EC:3	Acting on carbon-nitrogen bonds, other than peptide bonds; Hydrolases	F:GO:0016787; F:GO:0016810	F:hydrolase activity; F:hydrolase activity, acting on carbon-nitrogen (but not peptide) bonds
000001F|arrow.g1074.t1	Short-chain dehydrogenase/reductase SDR	293	2.55939e-137	76.56	F:GO:0016491	F:oxidoreductase activity	EC:1	Oxidoreductases	F:GO:0016491	F:oxidoreductase activity
000001F|arrow.g1075.t1	Nuclear transport factor 2	124	1.53672e-62	79.16					no GO terms	no GO terms
000001F|arrow.g1076.t1	PLP-dependent transferase	490	0	83.56	F:GO:0003674	F:molecular_function	EC:2.6.1; EC:2; EC:2.6	Transferring nitrogenous groups; Transferases; Transferring nitrogenous groups	F:GO:0003824	F:catalytic activity
000001F|arrow.g1077.t1	P-loop containing nucleoside triphosphate hydrolase protein	618	0	79.14	F:GO:0016887; F:GO:0022857; F:GO:0043167; C:GO:0005575	F:ATPase activity; F:transmembrane transporter activity; F:ion binding; C:cellular_component	EC:3.6.1; EC:3.6; EC:3; EC:7; EC:7.2.2; EC:3.6.1.15	Acting on acid anhydrides; Acting on acid anhydrides; Hydrolases; Translocases; Catalysing the translocation of inorganic cations; Nucleoside-triphosphate phosphatase	F:GO:0005524; F:GO:0042626; C:GO:0016020	F:ATP binding; F:ATPase-coupled transmembrane transporter activity; C:membrane
000001F|arrow.g1078.t1	fungal-specific transcription factor domain-containing protein	1397	0	92.07	P:GO:0009058; P:GO:0034641; F:GO:0003677; F:GO:0003700; F:GO:0043167	P:biosynthetic process; P:cellular nitrogen compound metabolic process; F:DNA binding; F:DNA-binding transcription factor activity; F:ion binding			P:GO:0006351; P:GO:0006355; F:GO:0000981; F:GO:0003677; F:GO:0008270	P:transcription, DNA-templated; P:regulation of transcription, DNA-templated; F:DNA-binding transcription factor activity, RNA polymerase II-specific; F:DNA binding; F:zinc ion binding
000001F|arrow.g1079.t1	predicted protein	118	2.45354e-67	86.26					no GO terms	no GO terms
000001F|arrow.g1080.t1	MFS sugar transporter	543	0	88.62	P:GO:0042592; F:GO:0022857; F:GO:0043167; C:GO:0005886	P:homeostatic process; F:transmembrane transporter activity; F:ion binding; C:plasma membrane	EC:7	Translocases	P:GO:0055085; F:GO:0022857; C:GO:0016020; C:GO:0016021	P:transmembrane transport; F:transmembrane transporter activity; C:membrane; C:integral component of membrane
000001F|arrow.g1081.t1	monooxygenase	448	0	92.89	F:GO:0016491; F:GO:0043167	F:oxidoreductase activity; F:ion binding	EC:1	Oxidoreductases	F:GO:0071949	F:FAD binding
000001F|arrow.g1082.t1	hypothetical protein ATETN484_0009011100	389	2.20945e-170	62.04	F:GO:0043167	F:ion binding			no GO terms	no GO terms
000001F|arrow.g1083.t1	hypothetical protein ATETN484_0009011200	514	0	76.22					no GO terms	no GO terms
000001F|arrow.g1084.t1	putative uncharacterized hydrolase C7D4.05	314	0	76.42	F:GO:0016787	F:hydrolase activity			no GO terms	no GO terms
000001F|arrow.g1085.t1	MRC1-like domain-containing protein	1262	0	80.53					no GO terms	no GO terms
000001F|arrow.g1086.t1	RNA polymerase II transcription elongation factor Rtf1p	607	0	91.13	F:GO:0003677	F:DNA binding			F:GO:0003677	F:DNA binding
000001F|arrow.g1087.t1	ubiquinone biosynthesis protein COQ7-domain-containing protein	254	8.499e-175	88.43	P:GO:0009058; P:GO:0044281; F:GO:0016491; F:GO:0043167; C:GO:0005739	P:biosynthetic process; P:small molecule metabolic process; F:oxidoreductase activity; F:ion binding; C:mitochondrion	EC:1; EC:1.14; EC:1.14.13	Oxidoreductases; Acting on paired donors, with incorporation or reduction of molecular oxygen. The oxygen incorporated need not be derived from O(2); Acting on paired donors, with incorporation or reduction of molecular oxygen. The oxygen incorporated need not be derived from O(2)	P:GO:0006744; F:GO:0004497	P:ubiquinone biosynthetic process; F:monooxygenase activity
000001F|arrow.g1088.t1	phosphotyrosine protein phosphatase I superfamily	211	8.12828e-126	90.07	P:GO:0006464; F:GO:0016791; C:GO:0005737	P:cellular protein modification process; F:phosphatase activity; C:cytoplasm	EC:3.1; EC:3.1.3.48; EC:3; EC:3.1.3.2; EC:3.1.3	Acting on ester bonds; Protein-tyrosine-phosphatase; Hydrolases; Acid phosphatase; Acting on ester bonds	P:GO:0006470; F:GO:0003993; F:GO:0004725; F:GO:0004726; C:GO:0005737	P:protein dephosphorylation; F:acid phosphatase activity; F:protein tyrosine phosphatase activity; F:non-membrane spanning protein tyrosine phosphatase activity; C:cytoplasm
000001F|arrow.g1089.t1	copper amine oxidase	765	0	88.65	P:GO:0008150; F:GO:0016491; F:GO:0016829; F:GO:0043167	P:biological_process; F:oxidoreductase activity; F:lyase activity; F:ion binding	EC:1.4; EC:1.4.3; EC:1; EC:4.4; EC:4; EC:1.4.3.21	Acting on the CH-NH(2) group of donors; Acting on the CH-NH(2) group of donors; Oxidoreductases; Carbon-sulfur lyases; Lyases; Primary-amine oxidase	P:GO:0009308; F:GO:0005507; F:GO:0008131; F:GO:0016846; F:GO:0048038	P:amine metabolic process; F:copper ion binding; F:primary amine oxidase activity; F:carbon-sulfur lyase activity; F:quinone binding
000001F|arrow.g1090.t1	chitin synthase-domain-containing protein	900	0	94.9	P:GO:0009058; P:GO:0071554; F:GO:0016757; C:GO:0005886	P:biosynthetic process; P:cell wall organization or biogenesis; F:transferase activity, transferring glycosyl groups; C:plasma membrane	EC:2.4; EC:2.4.1.16; EC:2; EC:2.4.1	Glycosyltransferases; Chitin synthase; Transferases; Glycosyltransferases	P:GO:0006031; F:GO:0004100; F:GO:0016758	P:chitin biosynthetic process; F:chitin synthase activity; F:transferase activity, transferring hexosyl groups
000001F|arrow.g1091.t1	integral membrane protein	211	1.91004e-96	77.99	C:GO:0005575	C:cellular_component			no GO terms	no GO terms
000001F|arrow.g1092.t1	hypothetical protein ATETN484_0009012500	292	2.46028e-99	52.65					no IPS match	no IPS match
000001F|arrow.g1093.t1	2-dehydropantoate 2-reductase	337	0	83.57	P:GO:0009058; P:GO:0034641; P:GO:0044281; F:GO:0016491	P:biosynthetic process; P:cellular nitrogen compound metabolic process; P:small molecule metabolic process; F:oxidoreductase activity	EC:1.1; EC:1; EC:1.1.1.169; EC:3; EC:1.1.1	Acting on the CH-OH group of donors; Oxidoreductases; 2-dehydropantoate 2-reductase; Hydrolases; Acting on the CH-OH group of donors	P:GO:0015940; F:GO:0008677; F:GO:0016491	P:pantothenate biosynthetic process; F:2-dehydropantoate 2-reductase activity; F:oxidoreductase activity
000001F|arrow.g1094.t1	predicted protein	714	0	79.18	F:GO:0003674	F:molecular_function	EC:3	Hydrolases	F:GO:0016787	F:hydrolase activity
000001F|arrow.g1095.t1	major facilitator superfamily domain-containing protein	522	0	83.57	F:GO:0022857; C:GO:0005575	F:transmembrane transporter activity; C:cellular_component	EC:7	Translocases	P:GO:0055085; F:GO:0022857	P:transmembrane transport; F:transmembrane transporter activity
000001F|arrow.g1096.t1	major facilitator superfamily transporter	526	0	84.77	F:GO:0022857; C:GO:0005575	F:transmembrane transporter activity; C:cellular_component	EC:7	Translocases	P:GO:0055085; F:GO:0022857	P:transmembrane transport; F:transmembrane transporter activity
000001F|arrow.g1097.t1	DUF521 domain protein	577	0	79.59					no GO terms	no GO terms
000001F|arrow.g1098.t1	Alpha/Beta hydrolase protein	325	0	83.32	F:GO:0003674	F:molecular_function	EC:3	Hydrolases	F:GO:0016787	F:hydrolase activity
000001F|arrow.g1099.t1	acetyl-CoA synthetase-like protein	1456	0	75.52	F:GO:0016491; F:GO:0043167	F:oxidoreductase activity; F:ion binding	EC:1; EC:1.14	Oxidoreductases; Acting on paired donors, with incorporation or reduction of molecular oxygen. The oxygen incorporated need not be derived from O(2)	F:GO:0005506; F:GO:0016705; F:GO:0020037	F:iron ion binding; F:oxidoreductase activity, acting on paired donors, with incorporation or reduction of molecular oxygen; F:heme binding
000001F|arrow.g1100.t1	L-PSP endoribonuclease family protein	152	5.73013e-108	97.3					no GO terms	no GO terms
000001F|arrow.g1101.t1	putative sulfate transporter	435	0	92.82	F:GO:0016746; F:GO:0022857; C:GO:0005575	F:transferase activity, transferring acyl groups; F:transmembrane transporter activity; C:cellular_component	EC:2.3; EC:2.3.1.5; EC:2; EC:7; EC:2.3.1	Acyltransferases; Arylamine N-acetyltransferase; Transferases; Translocases; Acyltransferases	P:GO:0015689; F:GO:0015098	P:molybdate ion transport; F:molybdate ion transmembrane transporter activity
000001F|arrow.g1102.t1	catalytic protein	518	0	58.67	F:GO:0043167	F:ion binding			F:GO:0043531	F:ADP binding
000001F|arrow.g1103.t1	trypsin-like cysteine/serine peptidase domain-containing protein	245	1.2665e-125	64.2	F:GO:0008233	F:peptidase activity	EC:3.4.21.73; EC:3.4.24.7; EC:3.4.21.71; EC:3.4.24.3; EC:3.4.21.34; EC:3.4.21.78; EC:3.4.21.75; EC:3.4.21.26; EC:3.4.21.27; EC:3.4.21.68; EC:3.4.21.69; EC:3.4.24.34; EC:3.4.21.41; EC:3.4.21.83; EC:3.4.21.88; EC:3.4.21.45; EC:3.4.21.89; EC:3.4.21.42; EC:3.4.19.1; EC:3.4.21.43; EC:3.4.21.87; EC:3.4.21.38; EC:3.4.21.35; EC:3.4.21.79; EC:3.4.21.36; EC:3.4.21.102; EC:3.4.21.39; EC:3.4.21; EC:3.4.21.4;…	U-plasminogen activator; Interstitial collagenase; Pancreatic elastase II; Microbial collagenase; Plasma kallikrein; Granzyme A; Furin; Prolyl oligopeptidase; Coagulation factor XIa; T-plasminogen activator; Protein C (activated); Neutrophil collagenase; Complement subcomponent C1r; Oligopeptidase B; Repressor LexA; Complement factor I; Signal peptidase I; Complement subcomponent C1s; Acylaminoac…	P:GO:0006508; F:GO:0004252	P:proteolysis; F:serine-type endopeptidase activity
000001F|arrow.g1104.t1	hypothetical protein ATETN484_0009013600	102	2.1044e-46	72.46					no GO terms	no GO terms
000001F|arrow.g1105.t1	putative cytochrome P450	733	0	85.94	F:GO:0016491; F:GO:0043167; C:GO:0005575	F:oxidoreductase activity; F:ion binding; C:cellular_component	EC:1; EC:1.14	Oxidoreductases; Acting on paired donors, with incorporation or reduction of molecular oxygen. The oxygen incorporated need not be derived from O(2)	F:GO:0005506; F:GO:0016705; F:GO:0020037	F:iron ion binding; F:oxidoreductase activity, acting on paired donors, with incorporation or reduction of molecular oxygen; F:heme binding
000001F|arrow.g1106.t1	putative AflR-like C6 zinc cluster transcription factor	411	0	95.14	P:GO:0009058; P:GO:0034641; F:GO:0003677; F:GO:0003700; F:GO:0043167	P:biosynthetic process; P:cellular nitrogen compound metabolic process; F:DNA binding; F:DNA-binding transcription factor activity; F:ion binding			P:GO:0006355; F:GO:0000981; F:GO:0008270	P:regulation of transcription, DNA-templated; F:DNA-binding transcription factor activity, RNA polymerase II-specific; F:zinc ion binding
000001F|arrow.g1107.t1	RecName: Full=Asperlin biosynthesis cluster protein G	259	1.60386e-152	82.35	C:GO:0005575	C:cellular_component			no GO terms	no GO terms
000001F|arrow.g1108.t1	membrane bound O-acyl transferase family-domain-containing protein	391	0	96.39	F:GO:0003674; C:GO:0005575	F:molecular_function; C:cellular_component	EC:2	Transferases	no GO terms	no GO terms
000001F|arrow.g1109.t1	MFS general substrate transporter	557	0	97.9	F:GO:0022857; C:GO:0005575	F:transmembrane transporter activity; C:cellular_component	EC:7	Translocases	P:GO:0055085; F:GO:0022857	P:transmembrane transport; F:transmembrane transporter activity
000001F|arrow.g1110.t1	cytochrome P450 82A2	556	0	90.07	F:GO:0016491; F:GO:0043167; C:GO:0005575	F:oxidoreductase activity; F:ion binding; C:cellular_component	EC:1; EC:1.14	Oxidoreductases; Acting on paired donors, with incorporation or reduction of molecular oxygen. The oxygen incorporated need not be derived from O(2)	F:GO:0004497; F:GO:0005506; F:GO:0016705; F:GO:0020037	F:monooxygenase activity; F:iron ion binding; F:oxidoreductase activity, acting on paired donors, with incorporation or reduction of molecular oxygen; F:heme binding
000001F|arrow.g1111.t1	inducible nitrate reductase 2	467	0	66.07	F:GO:0016491	F:oxidoreductase activity	EC:1	Oxidoreductases	F:GO:0016491	F:oxidoreductase activity
000001F|arrow.g1112.t1	serine hydrolase FSH	284	0	85.15	P:GO:0006629; P:GO:0009058; P:GO:0044281; F:GO:0016491; F:GO:0016746; C:GO:0005737	P:lipid metabolic process; P:biosynthetic process; P:small molecule metabolic process; F:oxidoreductase activity; F:transferase activity, transferring acyl groups; C:cytoplasm	EC:2.3.1.41; EC:2.3.1.85; EC:2.3; EC:1; EC:2; EC:3; EC:2.3.1	Beta-ketoacyl-[acyl-carrier-protein] synthase I; Fatty-acid synthase system; Acyltransferases; Oxidoreductases; Transferases; Hydrolases; Acyltransferases	no GO terms	no GO terms
000001F|arrow.g1113.t1	putative polyketide synthase	2432	0	79.64	P:GO:0006629; P:GO:0009058; P:GO:0019748; P:GO:0044281; F:GO:0016491; F:GO:0016746; C:GO:0005575	P:lipid metabolic process; P:biosynthetic process; P:secondary metabolic process; P:small molecule metabolic process; F:oxidoreductase activity; F:transferase activity, transferring acyl groups; C:cellular_component	EC:2.3.1.41; EC:2.3.1.85; EC:2.3; EC:1; EC:2; EC:2.3.1	Beta-ketoacyl-[acyl-carrier-protein] synthase I; Fatty-acid synthase system; Acyltransferases; Oxidoreductases; Transferases; Acyltransferases	P:GO:0006633; F:GO:0004315; F:GO:0016491; F:GO:0016740; F:GO:0016746; F:GO:0031177	P:fatty acid biosynthetic process; F:3-oxoacyl-[acyl-carrier-protein] synthase activity; F:oxidoreductase activity; F:transferase activity; F:transferase activity, transferring acyl groups; F:phosphopantetheine binding
000001F|arrow.g1114.t1	pectin lyase fold/virulence factor	451	0	95.89	P:GO:0005975; P:GO:0071554; F:GO:0016798; F:GO:0016829; C:GO:0005576	P:carbohydrate metabolic process; P:cell wall organization or biogenesis; F:hydrolase activity, acting on glycosyl bonds; F:lyase activity; C:extracellular region	EC:3.2; EC:3; EC:4; EC:3.2.1.15; EC:3.2.1	Glycosylases; Hydrolases; Lyases; Endo-polygalacturonase; Glycosylases	P:GO:0005975; F:GO:0004650	P:carbohydrate metabolic process; F:polygalacturonase activity
000001F|arrow.g1115.t1	phytanoyl-CoA dioxygenase family protein	322	0	89.57	F:GO:0016491	F:oxidoreductase activity	EC:1	Oxidoreductases	no GO terms	no GO terms
000001F|arrow.g1116.t1	WD40 repeat-like protein	541	0	96.5	P:GO:0034641; P:GO:0042254; F:GO:0003674; C:GO:0005730	P:cellular nitrogen compound metabolic process; P:ribosome biogenesis; F:molecular_function; C:nucleolus			P:GO:0006364; F:GO:0005515; C:GO:0005730	P:rRNA processing; F:protein binding; C:nucleolus
000001F|arrow.g1117.t1	ATP-dependent RNA helicase MSS116	560	0	90.19	F:GO:0004386; F:GO:0043167	F:helicase activity; F:ion binding	EC:3.6.1; EC:3.6.4.13; EC:3.6; EC:3; EC:3.6.1.15	Acting on acid anhydrides; RNA helicase; Acting on acid anhydrides; Hydrolases; Nucleoside-triphosphate phosphatase	F:GO:0003676; F:GO:0004386; F:GO:0005524	F:nucleic acid binding; F:helicase activity; F:ATP binding
000001F|arrow.g1118.t1	predicted protein	90	1.50404e-47	63.39	P:GO:0006950	P:response to stress			P:GO:0006952	P:defense response
000001F|arrow.g1119.t1	putative allantoinase	498	0	87.45	F:GO:0016810; C:GO:0005737	F:hydrolase activity, acting on carbon-nitrogen (but not peptide) bonds; C:cytoplasm	EC:3.5; EC:3	Acting on carbon-nitrogen bonds, other than peptide bonds; Hydrolases	F:GO:0016787; F:GO:0016810; C:GO:0005737	F:hydrolase activity; F:hydrolase activity, acting on carbon-nitrogen (but not peptide) bonds; C:cytoplasm
000001F|arrow.g1120.t1	hypothetical protein ATETN484_0009014300	158	5.90872e-60	67.36	P:GO:0008150; F:GO:0003674; C:GO:0005575	P:biological_process; F:molecular_function; C:cellular_component			no GO terms	no GO terms
000001F|arrow.g1121.t1	C2 and Extensin domain protein [Aspergillus nomiae NRRL 13137]	909	0	75.25					no GO terms	no GO terms
000001F|arrow.g1122.t1	hypothetical pathogenicity factor	302	4.61482e-108	59.85					no GO terms	no GO terms
000001F|arrow.g1123.t1	hypothetical protein ATETN484_0009014600	208	1.54281e-145	93.45	C:GO:0005575	C:cellular_component			no GO terms	no GO terms
000001F|arrow.g1124.t1	pre-mRNA splicing factor	1273	0	87.15	P:GO:0006397; F:GO:0003723; C:GO:0005575	P:mRNA processing; F:RNA binding; C:cellular_component			P:GO:0006396; F:GO:0003676; F:GO:0005515	P:RNA processing; F:nucleic acid binding; F:protein binding
000001F|arrow.g1125.t1	54S ribosomal protein L22, mitochondrial	360	0	87.53	P:GO:0006412; P:GO:0022607; P:GO:0042254; F:GO:0003735; C:GO:0005840; C:GO:0032991	P:translation; P:cellular component assembly; P:ribosome biogenesis; F:structural constituent of ribosome; C:ribosome; C:protein-containing complex			P:GO:0006412; F:GO:0003735; C:GO:0005840; C:GO:0015934	P:translation; F:structural constituent of ribosome; C:ribosome; C:large ribosomal subunit
000001F|arrow.g1126.t1	phosphomutase-like protein 3	379	0	83.96	C:GO:0005575	C:cellular_component			no GO terms	no GO terms
000001F|arrow.g1127.t1	predicted protein	523	2.27589e-157	60.7	C:GO:0016020; C:GO:0016021	C:membrane; C:integral component of membrane			no GO terms	no GO terms
000001F|arrow.g1128.t1	predicted protein	172	7.51371e-41	65.67	F:GO:0003674	F:molecular_function			F:GO:0005515	F:protein binding
000001F|arrow.g1129.t1	AMP-binding enzyme, putative	832	0	89.03	P:GO:0006464; P:GO:0006629; P:GO:0044281; F:GO:0016301; F:GO:0016874; F:GO:0016887; F:GO:0043167	P:cellular protein modification process; P:lipid metabolic process; P:small molecule metabolic process; F:kinase activity; F:ligase activity; F:ATPase activity; F:ion binding	EC:2.7.1; EC:3.6.1.15; EC:3.6.1; EC:2.7; EC:3.6; EC:2; EC:6.2; EC:3; EC:6.2.1.3; EC:6; EC:6.2.1.2; EC:6.2.1	Transferring phosphorus-containing groups; Nucleoside-triphosphate phosphatase; Acting on acid anhydrides; Transferring phosphorus-containing groups; Acting on acid anhydrides; Transferases; Forming carbon-sulfur bonds; Hydrolases; Long-chain-fatty-acid--CoA ligase; Ligases; Medium-chain acyl-CoA ligase; Forming carbon-sulfur bonds	P:GO:0006468; F:GO:0004672; F:GO:0005524	P:protein phosphorylation; F:protein kinase activity; F:ATP binding
000001F|arrow.g1130.t1	alcohol dehydrogenase, putative	388	0	88.08	F:GO:0016491; F:GO:0043167	F:oxidoreductase activity; F:ion binding	EC:1	Oxidoreductases	F:GO:0016491	F:oxidoreductase activity
000001F|arrow.g1131.t1	O-methylsterigmatocystin oxidoreductase	1172	0	90.65	P:GO:0009058; P:GO:0034641; F:GO:0003677; F:GO:0003700; F:GO:0016491; F:GO:0043167; C:GO:0005575	P:biosynthetic process; P:cellular nitrogen compound metabolic process; F:DNA binding; F:DNA-binding transcription factor activity; F:oxidoreductase activity; F:ion binding; C:cellular_component	EC:1; EC:1.14	Oxidoreductases; Acting on paired donors, with incorporation or reduction of molecular oxygen. The oxygen incorporated need not be derived from O(2)	P:GO:0006351; F:GO:0003677; F:GO:0005506; F:GO:0008270; F:GO:0016705; F:GO:0020037	P:transcription, DNA-templated; F:DNA binding; F:iron ion binding; F:zinc ion binding; F:oxidoreductase activity, acting on paired donors, with incorporation or reduction of molecular oxygen; F:heme binding
000001F|arrow.g1132.t1	serine/threonine protein kinase, putative	337	1.27056e-164	57.89	P:GO:0006464; F:GO:0016301; F:GO:0043167	P:cellular protein modification process; F:kinase activity; F:ion binding	EC:2.7.1; EC:2.7; EC:2	Transferring phosphorus-containing groups; Transferring phosphorus-containing groups; Transferases	P:GO:0006468; F:GO:0004672; F:GO:0005524	P:protein phosphorylation; F:protein kinase activity; F:ATP binding
000001F|arrow.g1133.t1	coiled-coil domain-containing protein-domain-containing protein	201	1.14979e-139	91.77					no GO terms	no GO terms
000001F|arrow.g1134.t1	spermine/spermidine synthase family protein	551	0	86.21	C:GO:0005575	C:cellular_component			no GO terms	no GO terms
000001F|arrow.g1135.t1	peptidase aspartic, active site	258	2.59204e-137	68.91	F:GO:0003674	F:molecular_function			F:GO:0005515	F:protein binding
000001F|arrow.g1136.t1	dynein light intermediate chain	521	0	95.03	P:GO:0008150; C:GO:0005737; C:GO:0005856; C:GO:0032991	P:biological_process; C:cytoplasm; C:cytoskeleton; C:protein-containing complex			P:GO:0007018; C:GO:0005868	P:microtubule-based movement; C:cytoplasmic dynein complex
000001F|arrow.g1137.t1	RNA recognition motif containing protein	290	1.81222e-136	88.08	F:GO:0003723	F:RNA binding			F:GO:0003676	F:nucleic acid binding
000001F|arrow.g1138.t1	WD40-repeat-containing domain protein	376	0	92.01	F:GO:0003674	F:molecular_function			F:GO:0005515	F:protein binding
000001F|arrow.g1139.t1	septin spn3	382	0	96.13	F:GO:0043167	F:ion binding			F:GO:0005525	F:GTP binding
000001F|arrow.g1140.t1	Rho guanyl nucleotide exchange factor	1204	0	94.86	P:GO:0007165; F:GO:0030234	P:signal transduction; F:enzyme regulator activity			P:GO:0035556; F:GO:0005085	P:intracellular signal transduction; F:guanyl-nucleotide exchange factor activity
000001F|arrow.g1141.t1	vacuolar ATPase proteolipid subunit C	162	4.64669e-108	97.51	F:GO:0022857; C:GO:0005773; C:GO:0032991	F:transmembrane transporter activity; C:vacuole; C:protein-containing complex	EC:7	Translocases	P:GO:1902600; F:GO:0015078; C:GO:0033177; C:GO:0033179	P:proton transmembrane transport; F:proton transmembrane transporter activity; C:proton-transporting two-sector ATPase complex, proton-transporting domain; C:proton-transporting V-type ATPase, V0 domain
000001F|arrow.g1142.t1	kinase-like domain-containing protein	396	0	91.26	P:GO:0006464; F:GO:0016301; F:GO:0043167	P:cellular protein modification process; F:kinase activity; F:ion binding	EC:2.7.1; EC:2.7.11; EC:2.7; EC:2	Transferring phosphorus-containing groups; Transferring phosphorus-containing groups; Transferring phosphorus-containing groups; Transferases	P:GO:0006468; F:GO:0004672; F:GO:0004674; F:GO:0005524	P:protein phosphorylation; F:protein kinase activity; F:protein serine/threonine kinase activity; F:ATP binding
000001F|arrow.g1143.t1	initiation-specific alpha-1,6-mannosyltransferase	359	0	90.5	P:GO:0008150; F:GO:0016757	P:biological_process; F:transferase activity, transferring glycosyl groups	EC:2.4; EC:2; EC:2.4.1.232; EC:2.4.1	Glycosyltransferases; Transferases; Initiation-specific alpha-1,6-mannosyltransferase; Glycosyltransferases	F:GO:0000009	F:alpha-1,6-mannosyltransferase activity
000001F|arrow.g1144.t1	---NA---	101							no GO terms	no GO terms
000001F|arrow.g1145.t1	glycosyl hydrolase family 43 protein	407	0	82.54	P:GO:0005975; F:GO:0016798; C:GO:0005575	P:carbohydrate metabolic process; F:hydrolase activity, acting on glycosyl bonds; C:cellular_component	EC:3.2; EC:3; EC:3.2.1	Glycosylases; Hydrolases; Glycosylases	P:GO:0005975; F:GO:0004553	P:carbohydrate metabolic process; F:hydrolase activity, hydrolyzing O-glycosyl compounds
000001F|arrow.g1146.t1	putative epoxide hydrolase	328	5.51245e-155	73.76	F:GO:0003674	F:molecular_function			F:GO:0003824	F:catalytic activity
000001F|arrow.g1147.t1	Alpha/Beta hydrolase protein	534	0	91.46	P:GO:0009058; F:GO:0016746	P:biosynthetic process; F:transferase activity, transferring acyl groups	EC:2.3; EC:2; EC:3; EC:2.3.1	Acyltransferases; Transferases; Hydrolases; Acyltransferases	P:GO:0009058; F:GO:0016747	P:biosynthetic process; F:transferase activity, transferring acyl groups other than amino-acyl groups
000001F|arrow.g1148.t1	ThiF domain protein	510	0	91.43	F:GO:0016874; C:GO:0005575	F:ligase activity; C:cellular_component	EC:6.2; EC:6	Forming carbon-sulfur bonds; Ligases	F:GO:0008641	F:ubiquitin-like modifier activating enzyme activity
000001F|arrow.g1149.t1	Metallo-dependent phosphatase-like protein	419	0	84.02	F:GO:0003674; C:GO:0005575	F:molecular_function; C:cellular_component	EC:3	Hydrolases	F:GO:0016787	F:hydrolase activity
000001F|arrow.g1150.t1	collagen-like protein	493	1.81735e-103	56.2	P:GO:0008150; F:GO:0003674; F:GO:0016787; C:GO:0005575	P:biological_process; F:molecular_function; F:hydrolase activity; C:cellular_component			no GO terms	no GO terms
000001F|arrow.g1151.t1	hypothetical protein Y699_05436	255	3.40979e-145	77.04					no GO terms	no GO terms
000001F|arrow.g1152.t1	hypothetical protein BA78_8684	573	1.93534e-37	65.63					no GO terms	no GO terms
000001F|arrow.g1153.t1	hypothetical protein BDV26DRAFT_79354	412	7.58628e-68	50.62					no GO terms	no GO terms
000001F|arrow.g1154.t1	hypothetical protein BDV24DRAFT_137919	321	1.42344e-17	47.35	F:GO:0008061; C:GO:0005576	F:chitin binding; C:extracellular region			no GO terms	no GO terms
000001F|arrow.g1155.t1	LCCL domain protein	794	0	82.81	C:GO:0005575	C:cellular_component			C:GO:0016020	C:membrane
000001F|arrow.g1156.t1	beta-lactamase-like protein	226	9.54809e-158	91.86	P:GO:0008150; C:GO:0005575	P:biological_process; C:cellular_component			no GO terms	no GO terms
000001F|arrow.g1157.t1	Nse4 C-terminal-domain-containing protein	404	0	90.97	P:GO:0006259; P:GO:0006950; C:GO:0005634; C:GO:0005694; C:GO:0032991	P:DNA metabolic process; P:response to stress; C:nucleus; C:chromosome; C:protein-containing complex			P:GO:0006281; C:GO:0005634; C:GO:0030915	P:DNA repair; C:nucleus; C:Smc5-Smc6 complex
000001F|arrow.g1158.t1	kinase-like domain-containing protein	902	0	94.29	P:GO:0006629; P:GO:0007165; P:GO:0009058; F:GO:0016301; F:GO:0043167	P:lipid metabolic process; P:signal transduction; P:biosynthetic process; F:kinase activity; F:ion binding	EC:2.7.1; EC:2.7; EC:2; EC:2.7.1.137	Transferring phosphorus-containing groups; Transferring phosphorus-containing groups; Transferases; Phosphatidylinositol 3-kinase	P:GO:0046854; P:GO:0048015; F:GO:0016301; F:GO:0016303	P:phosphatidylinositol phosphorylation; P:phosphatidylinositol-mediated signaling; F:kinase activity; F:1-phosphatidylinositol-3-kinase activity
000001F|arrow.g1159.t1	HCO3- transporter family protein	990	0	86.57	F:GO:0022857; C:GO:0005575	F:transmembrane transporter activity; C:cellular_component	EC:7	Translocases	P:GO:0006820; F:GO:0005452; C:GO:0016020; C:GO:0016021	P:anion transport; F:inorganic anion exchanger activity; C:membrane; C:integral component of membrane
000001F|arrow.g1160.t1	phenol 2-monooxygenase	829	0	77.33	F:GO:0043167	F:ion binding			F:GO:0003824; F:GO:0071949	F:catalytic activity; F:FAD binding
000001F|arrow.g1161.t1	mitochondrial GTPase (YlqF)	199	1.71038e-138	94.93	F:GO:0043167; C:GO:0005739	F:ion binding; C:mitochondrion	EC:3	Hydrolases	F:GO:0005525	F:GTP binding
000001F|arrow.g1162.t1	Isy1-like splicing factor	251	7.38151e-179	98.28	P:GO:0006397; P:GO:0022618; F:GO:0008092; F:GO:0043167; C:GO:0005856; C:GO:0032991	P:mRNA processing; P:ribonucleoprotein complex assembly; F:cytoskeletal protein binding; F:ion binding; C:cytoskeleton; C:protein-containing complex	EC:3.6.1; EC:3.6; EC:3; EC:3.6.1.15	Acting on acid anhydrides; Acting on acid anhydrides; Hydrolases; Nucleoside-triphosphate phosphatase	P:GO:0000350	P:generation of catalytic spliceosome for second transesterification step
000001F|arrow.g1163.t1	DNA damage repair protein Mus42, putative	1160	0	83.15	P:GO:0006259; P:GO:0006950; P:GO:0009058; F:GO:0003677; F:GO:0016779	P:DNA metabolic process; P:response to stress; P:biosynthetic process; F:DNA binding; F:nucleotidyltransferase activity	EC:2.7; EC:2; EC:2.7.7	Transferring phosphorus-containing groups; Transferases; Transferring phosphorus-containing groups	P:GO:0006281; P:GO:0042276; F:GO:0003684; F:GO:0016779	P:DNA repair; P:error-prone translesion synthesis; F:damaged DNA binding; F:nucleotidyltransferase activity
000001F|arrow.g1164.t1	NRPS-like enzyme	1046	0	87.25	P:GO:0009058; P:GO:0034641; F:GO:0003677; F:GO:0003700; F:GO:0043167	P:biosynthetic process; P:cellular nitrogen compound metabolic process; F:DNA binding; F:DNA-binding transcription factor activity; F:ion binding			F:GO:0031177	F:phosphopantetheine binding
000001F|arrow.g1165.t1	fungal-specific transcription factor domain protein	760	0	79.76	P:GO:0009058; P:GO:0034641; F:GO:0003677; F:GO:0003700; F:GO:0043167; C:GO:0005575	P:biosynthetic process; P:cellular nitrogen compound metabolic process; F:DNA binding; F:DNA-binding transcription factor activity; F:ion binding; C:cellular_component			P:GO:0006351; P:GO:0006355; F:GO:0000981; F:GO:0003677; F:GO:0008270	P:transcription, DNA-templated; P:regulation of transcription, DNA-templated; F:DNA-binding transcription factor activity, RNA polymerase II-specific; F:DNA binding; F:zinc ion binding
000001F|arrow.g1166.t1	C6 finger domain protein	179	9.4686e-79	79.53	P:GO:0009058; P:GO:0034641; F:GO:0003677; F:GO:0003700; F:GO:0043167	P:biosynthetic process; P:cellular nitrogen compound metabolic process; F:DNA binding; F:DNA-binding transcription factor activity; F:ion binding			no GO terms	no GO terms
000001F|arrow.g1167.t1	---NA---	130							no IPS match	no IPS match
000001F|arrow.g1168.t1	sister chromatid separation protein (Src1)	513	0	86.71	C:GO:0005635	C:nuclear envelope			no GO terms	no GO terms
000001F|arrow.g1169.t1	adenylate cyclase AcyA	2110	0	89.26	P:GO:0007165; P:GO:0009058; P:GO:0034641; P:GO:0044281; F:GO:0016791; F:GO:0016829; F:GO:0043167	P:signal transduction; P:biosynthetic process; P:cellular nitrogen compound metabolic process; P:small molecule metabolic process; F:phosphatase activity; F:lyase activity; F:ion binding	EC:3.1; EC:3; EC:4; EC:4.6; EC:4.6.1.1; EC:3.1.3	Acting on ester bonds; Hydrolases; Lyases; Phosphorus-oxygen lyases; Adenylate cyclase; Acting on ester bonds	P:GO:0006171; P:GO:0007165; P:GO:0009190; P:GO:0035556; F:GO:0000287; F:GO:0004016; F:GO:0005515; F:GO:0016791	P:cAMP biosynthetic process; P:signal transduction; P:cyclic nucleotide biosynthetic process; P:intracellular signal transduction; F:magnesium ion binding; F:adenylate cyclase activity; F:protein binding; F:phosphatase activity
000001F|arrow.g1170.t1	cell wall glucanase	371	0	87.75	P:GO:0005975; P:GO:0071554; F:GO:0016798; C:GO:0005618; C:GO:0005886	P:carbohydrate metabolic process; P:cell wall organization or biogenesis; F:hydrolase activity, acting on glycosyl bonds; C:cell wall; C:plasma membrane	EC:3.2; EC:3; EC:3.2.1	Glycosylases; Hydrolases; Glycosylases	P:GO:0005975; P:GO:0071555; F:GO:0004553; F:GO:0016798; C:GO:0005618	P:carbohydrate metabolic process; P:cell wall organization; F:hydrolase activity, hydrolyzing O-glycosyl compounds; F:hydrolase activity, acting on glycosyl bonds; C:cell wall
000001F|arrow.g1171.t1	aquaglyceroporin, putative	254	2.41705e-165	91.77	F:GO:0022857; C:GO:0005575	F:transmembrane transporter activity; C:cellular_component	EC:7	Translocases	P:GO:0055085; F:GO:0015267; C:GO:0016020	P:transmembrane transport; F:channel activity; C:membrane
000001F|arrow.g1172.t1	glycerol kinase 2	588	0	91.65	P:GO:0005975; P:GO:0009056; P:GO:0044281; F:GO:0016301; F:GO:0043167; C:GO:0005737	P:carbohydrate metabolic process; P:catabolic process; P:small molecule metabolic process; F:kinase activity; F:ion binding; C:cytoplasm	EC:2.7.1; EC:2.7; EC:2; EC:2.7.1.30	Transferring phosphorus-containing groups; Transferring phosphorus-containing groups; Transferases; Glycerol kinase	P:GO:0005975; P:GO:0006072; F:GO:0004370; F:GO:0016773	P:carbohydrate metabolic process; P:glycerol-3-phosphate metabolic process; F:glycerol kinase activity; F:phosphotransferase activity, alcohol group as acceptor
000001F|arrow.g1173.t1	predicted protein	568	0	51.72	F:GO:0003674	F:molecular_function			F:GO:0005515	F:protein binding
000001F|arrow.g1174.t1	cytochrome P450 alkane hydroxylase	540	0	90.14	F:GO:0016491; F:GO:0043167; C:GO:0005575	F:oxidoreductase activity; F:ion binding; C:cellular_component	EC:1; EC:1.14.14; EC:1.14	Oxidoreductases; Acting on paired donors, with incorporation or reduction of molecular oxygen. The oxygen incorporated need not be derived from O(2); Acting on paired donors, with incorporation or reduction of molecular oxygen. The oxygen incorporated need not be derived from O(2)	F:GO:0005506; F:GO:0016705; F:GO:0020037	F:iron ion binding; F:oxidoreductase activity, acting on paired donors, with incorporation or reduction of molecular oxygen; F:heme binding
000001F|arrow.g1175.t1	hypothetical protein ASPVEDRAFT_38374	300	3.66684e-68	50.77	F:GO:0003674	F:molecular_function			F:GO:0005515	F:protein binding
000001F|arrow.g1176.t1	major facilitator superfamily domain-containing protein	577	0	84.28	F:GO:0022857; C:GO:0005575	F:transmembrane transporter activity; C:cellular_component	EC:7	Translocases	no GO terms	no GO terms
000001F|arrow.g1177.t1	thiazole biosynthesis enzyme	333	0	96.2	P:GO:0006790; P:GO:0007005; P:GO:0009058; P:GO:0034641; P:GO:0044281; F:GO:0016757; F:GO:0043167; C:GO:0005829	P:sulfur compound metabolic process; P:mitochondrion organization; P:biosynthetic process; P:cellular nitrogen compound metabolic process; P:small molecule metabolic process; F:transferase activity, transferring glycosyl groups; F:ion binding; C:cytosol	EC:2.4.2; EC:2.4; EC:2	Glycosyltransferases; Glycosyltransferases; Transferases	P:GO:0009228	P:thiamine biosynthetic process
000001F|arrow.g1178.t1	sphingomyelinase family protein	454	0	88.11	P:GO:0006629; F:GO:0004518; C:GO:0005575	P:lipid metabolic process; F:nuclease activity; C:cellular_component	EC:3.1.4; EC:3.1; EC:3; EC:3.1.4.12; EC:3.1.1	Acting on ester bonds; Acting on ester bonds; Hydrolases; Sphingomyelin phosphodiesterase; Acting on ester bonds	F:GO:0004767	F:sphingomyelin phosphodiesterase activity
000001F|arrow.g1179.t1	WD repeat protein	516	0	83.58	F:GO:0003674	F:molecular_function			F:GO:0005515	F:protein binding
000001F|arrow.g1180.t1	alkali-sensitive linkage protein 1	266	4.24659e-177	82.4	P:GO:0005975; P:GO:0071554	P:carbohydrate metabolic process; P:cell wall organization or biogenesis			no GO terms	no GO terms
000001F|arrow.g1181.t1	RED-like, N-terminal	559	0	78.88					no GO terms	no GO terms
000001F|arrow.g1182.t1	prolyl 4-hydroxylase, alpha subunit	320	2.94392e-159	75.46	F:GO:0016491; F:GO:0043167	F:oxidoreductase activity; F:ion binding	EC:1; EC:1.14	Oxidoreductases; Acting on paired donors, with incorporation or reduction of molecular oxygen. The oxygen incorporated need not be derived from O(2)	F:GO:0005506; F:GO:0016705; F:GO:0031418	F:iron ion binding; F:oxidoreductase activity, acting on paired donors, with incorporation or reduction of molecular oxygen; F:L-ascorbic acid binding
000001F|arrow.g1183.t1	ubiquitin-protein ligase E3 component (UBR1), putative	2157	0	91.18	P:GO:0006464; P:GO:0009056; F:GO:0016874; F:GO:0043167	P:cellular protein modification process; P:catabolic process; F:ligase activity; F:ion binding	EC:2; EC:6	Transferases; Ligases	P:GO:0071596; F:GO:0008270; F:GO:0061630	P:ubiquitin-dependent protein catabolic process via the N-end rule pathway; F:zinc ion binding; F:ubiquitin protein ligase activity
000001F|arrow.g1184.t1	UQCRX/QCR9 like ubiquinol-cytochrome C reductase family protein	129	1.10294e-19	75.14	P:GO:0006091; C:GO:0005739; C:GO:0032991	P:generation of precursor metabolites and energy; C:mitochondrion; C:protein-containing complex			P:GO:0006122; C:GO:0005743; C:GO:0005750	P:mitochondrial electron transport, ubiquinol to cytochrome c; C:mitochondrial inner membrane; C:mitochondrial respiratory chain complex III
000001F|arrow.g1185.t1	RNA binding protein Pym	208	2.5746e-123	84.41	P:GO:0008150; C:GO:0005737	P:biological_process; C:cytoplasm			P:GO:1903259	P:exon-exon junction complex disassembly
000001F|arrow.g1186.t1	protoporphyrinogen oxidase	608	0	78.63	P:GO:0009058; P:GO:0034641; F:GO:0016491; C:GO:0005739	P:biosynthetic process; P:cellular nitrogen compound metabolic process; F:oxidoreductase activity; C:mitochondrion	EC:1.3; EC:1; EC:1.3.3.4; EC:1.3.3	Acting on the CH-CH group of donors; Oxidoreductases; Protoporphyrinogen oxidase; Acting on the CH-CH group of donors	P:GO:0006779; F:GO:0004729; F:GO:0016491	P:porphyrin-containing compound biosynthetic process; F:oxygen-dependent protoporphyrinogen oxidase activity; F:oxidoreductase activity
000001F|arrow.g1187.t1	nuclear polyadenylated RNA-binding protein Nab2	498	0	86.61	P:GO:0006397; P:GO:0034655; F:GO:0003723; F:GO:0043167	P:mRNA processing; P:nucleobase-containing compound catabolic process; F:RNA binding; F:ion binding			P:GO:0043488; P:GO:1900364; F:GO:0008143	P:regulation of mRNA stability; P:negative regulation of mRNA polyadenylation; F:poly(A) binding
000001F|arrow.g1188.t1	predicted protein	345	0	81.04	P:GO:0009056; F:GO:0016810; F:GO:0043167; C:GO:0005575	P:catabolic process; F:hydrolase activity, acting on carbon-nitrogen (but not peptide) bonds; F:ion binding; C:cellular_component	EC:3.5.1; EC:3.5; EC:3; EC:3.5.1.28	Acting on carbon-nitrogen bonds, other than peptide bonds; Acting on carbon-nitrogen bonds, other than peptide bonds; Hydrolases; N-acetylmuramoyl-L-alanine amidase	P:GO:0009253; F:GO:0008270; F:GO:0008745	P:peptidoglycan catabolic process; F:zinc ion binding; F:N-acetylmuramoyl-L-alanine amidase activity
000001F|arrow.g1189.t1	predicted protein	184	1.66926e-12	60.16	F:GO:0004386; F:GO:0016787	F:helicase activity; F:hydrolase activity			no GO terms	no GO terms
000001F|arrow.g1190.t1	DUF1750-domain-containing protein	745	0	87.28					no GO terms	no GO terms
000001F|arrow.g1191.t1	MFS general substrate transporter	516	0	86.49	F:GO:0022857; C:GO:0005575	F:transmembrane transporter activity; C:cellular_component	EC:7	Translocases	P:GO:0055085; F:GO:0022857	P:transmembrane transport; F:transmembrane transporter activity
000001F|arrow.g1192.t1	predicted protein	173	3.42346e-38	65.12	P:GO:0006469; P:GO:0006897; P:GO:0008150; P:GO:0070941; F:GO:0003674; F:GO:0008289; C:GO:0005886; C:GO:0036286	P:negative regulation of protein kinase activity; P:endocytosis; P:biological_process; P:eisosome assembly; F:molecular_function; F:lipid binding; C:plasma membrane; C:eisosome filament			no GO terms	no GO terms
000001F|arrow.g1193.t1	sphingolipid long chain base-responsive protein PIL1	648	0	77.56	C:GO:0005575	C:cellular_component			no GO terms	no GO terms
000001F|arrow.g1194.t1	proteasome-domain-containing protein	296	0	99.02	P:GO:0009056; P:GO:0065003; F:GO:0008233; C:GO:0005622; C:GO:0032991	P:catabolic process; P:protein-containing complex assembly; F:peptidase activity; C:intracellular anatomical structure; C:protein-containing complex	EC:3.4.99; EC:3.4; EC:3.4.25; EC:3	Acting on peptide bonds (peptidases); Acting on peptide bonds (peptidases); Acting on peptide bonds (peptidases); Hydrolases	P:GO:0051603; F:GO:0004298; C:GO:0005839	P:proteolysis involved in cellular protein catabolic process; F:threonine-type endopeptidase activity; C:proteasome core complex
000001F|arrow.g1195.t1	DNA-directed RNA polymerase I subunit RPA2	1728	0	96.71	P:GO:0009058; P:GO:0034641; F:GO:0003677; F:GO:0016779; F:GO:0016829; C:GO:0005634	P:biosynthetic process; P:cellular nitrogen compound metabolic process; F:DNA binding; F:nucleotidyltransferase activity; F:lyase activity; C:nucleus	EC:2.7; EC:2; EC:4; EC:2.7.7; EC:2.7.7.6	Transferring phosphorus-containing groups; Transferases; Lyases; Transferring phosphorus-containing groups; DNA-directed RNA polymerase	P:GO:0006351; F:GO:0003677; F:GO:0003899; F:GO:0016829; F:GO:0032549; C:GO:0005634	P:transcription, DNA-templated; F:DNA binding; F:DNA-directed 5'-3' RNA polymerase activity; F:lyase activity; F:ribonucleoside binding; C:nucleus
000001F|arrow.g1196.t1	P-loop containing nucleoside triphosphate hydrolase protein	183	1.42314e-133	98.91	P:GO:0015031; F:GO:0003924; F:GO:0043167; C:GO:0031410	P:protein transport; F:GTPase activity; F:ion binding; C:cytoplasmic vesicle	EC:3.6.1; EC:3.6; EC:3; EC:3.6.1.15	Acting on acid anhydrides; Acting on acid anhydrides; Hydrolases; Nucleoside-triphosphate phosphatase	P:GO:0015031; F:GO:0003924; F:GO:0005525	P:protein transport; F:GTPase activity; F:GTP binding
000001F|arrow.g1197.t1	chitin synthesis regulation, resistance to congo red-domain-containing protein	150	5.79379e-67	84.25	C:GO:0005575	C:cellular_component			no GO terms	no GO terms
000001F|arrow.g1198.t1	predicted protein	405	0	72.24	C:GO:0005575	C:cellular_component			no GO terms	no GO terms
000001F|arrow.g1199.t1	CwfJ C-terminus 2-domain-containing protein-like protein	554	0	89.1	F:GO:0003674	F:molecular_function	EC:3	Hydrolases	no GO terms	no GO terms
000001F|arrow.g1200.t1	armadillo-type protein	2612	0	90.95					no GO terms	no GO terms
000001F|arrow.g1201.t1	DNL zinc finger-domain-containing protein	201	8.50968e-131	79.67	F:GO:0043167	F:ion binding			F:GO:0008270	F:zinc ion binding
000001F|arrow.g1202.t1	cullin-3 [Aspergillus nomiae NRRL 13137]	828	0	89.99	P:GO:0009056; F:GO:0019899; C:GO:0032991	P:catabolic process; F:enzyme binding; C:protein-containing complex			P:GO:0006511; F:GO:0031625; C:GO:0031461	P:ubiquitin-dependent protein catabolic process; F:ubiquitin protein ligase binding; C:cullin-RING ubiquitin ligase complex
000001F|arrow.g1203.t1	ankyrin and HET domain protein	829	0	75.64	F:GO:0003674	F:molecular_function			F:GO:0005515	F:protein binding
000001F|arrow.g1204.t1	DNA replication complex GINS protein SLD5	262	1.4603e-180	86.85	P:GO:0006259; P:GO:0006950; P:GO:0009058; P:GO:0051276; F:GO:0004386; C:GO:0000228; C:GO:0005654; C:GO:0032991	P:DNA metabolic process; P:response to stress; P:biosynthetic process; P:chromosome organization; F:helicase activity; C:nuclear chromosome; C:nucleoplasm; C:protein-containing complex	EC:3.6.1; EC:3.6.4.12; EC:3.6; EC:3; EC:3.6.1.15	Acting on acid anhydrides; DNA helicase; Acting on acid anhydrides; Hydrolases; Nucleoside-triphosphate phosphatase	P:GO:0006261	P:DNA-dependent DNA replication
000001F|arrow.g1205.t1	M-phase inducer phosphatase	559	0	90.96	P:GO:0006464; P:GO:0007049; P:GO:0051301; F:GO:0016791	P:cellular protein modification process; P:cell cycle; P:cell division; F:phosphatase activity	EC:3.1; EC:3.1.3.48; EC:3; EC:3.1.3	Acting on ester bonds; Protein-tyrosine-phosphatase; Hydrolases; Acting on ester bonds	P:GO:0006470; P:GO:1902751; F:GO:0004725	P:protein dephosphorylation; P:positive regulation of cell cycle G2/M phase transition; F:protein tyrosine phosphatase activity
000001F|arrow.g1206.t1	DNA polymerase V	982	0	90.34	P:GO:0009058; P:GO:0034641; F:GO:0003677; F:GO:0008134; C:GO:0005730	P:biosynthetic process; P:cellular nitrogen compound metabolic process; F:DNA binding; F:transcription factor binding; C:nucleolus			P:GO:0006355; F:GO:0003677; F:GO:0008134; C:GO:0005730	P:regulation of transcription, DNA-templated; F:DNA binding; F:transcription factor binding; C:nucleolus
000001F|arrow.g1207.t1	MOSC-domain-containing protein	353	0	84.47	F:GO:0043167; C:GO:0005575	F:ion binding; C:cellular_component			F:GO:0003824; F:GO:0030151; F:GO:0030170	F:catalytic activity; F:molybdenum ion binding; F:pyridoxal phosphate binding
000001F|arrow.g1208.t1	peptidase C15, pyroglutamyl peptidase I-like protein	276	0	81.14	F:GO:0008233; C:GO:0005829	F:peptidase activity; C:cytosol	EC:3.4; EC:3.4.19.9; EC:3; EC:3.4.19; EC:3.4.19.2	Acting on peptide bonds (peptidases); Folate gamma-glutamyl hydrolase; Hydrolases; Acting on peptide bonds (peptidases); Peptidyl-glycinamidase	no GO terms	no GO terms
000001F|arrow.g1209.t1	cytochrome P450	527	0	87.93	F:GO:0016491; F:GO:0043167; C:GO:0005575	F:oxidoreductase activity; F:ion binding; C:cellular_component	EC:1; EC:1.14	Oxidoreductases; Acting on paired donors, with incorporation or reduction of molecular oxygen. The oxygen incorporated need not be derived from O(2)	F:GO:0004497; F:GO:0005506; F:GO:0016705; F:GO:0020037	F:monooxygenase activity; F:iron ion binding; F:oxidoreductase activity, acting on paired donors, with incorporation or reduction of molecular oxygen; F:heme binding
000001F|arrow.g1210.t1	hypothetical protein ATETN484_0009023100	670	0	80.12					no GO terms	no GO terms
000001F|arrow.g1211.t1	enoyl-CoA hydratase	282	3.77203e-172	73.98	F:GO:0003674; C:GO:0005777	F:molecular_function; C:peroxisome			F:GO:0003824	F:catalytic activity
000001F|arrow.g1212.t1	checkpoint protein kinase	1230	0	82.95	P:GO:0006464; P:GO:0007059; P:GO:0051276; P:GO:0140014; F:GO:0016301; F:GO:0043167	P:cellular protein modification process; P:chromosome segregation; P:chromosome organization; P:mitotic nuclear division; F:kinase activity; F:ion binding	EC:2.7.1; EC:2.7; EC:2	Transferring phosphorus-containing groups; Transferring phosphorus-containing groups; Transferases	P:GO:0006468; P:GO:0007094; F:GO:0004672; F:GO:0005524	P:protein phosphorylation; P:mitotic spindle assembly checkpoint; F:protein kinase activity; F:ATP binding
000001F|arrow.g1213.t1	xylose isomerase-like protein	530	0	78.92	P:GO:0006259; P:GO:0006950; F:GO:0003677; F:GO:0043167	P:DNA metabolic process; P:response to stress; F:DNA binding; F:ion binding	EC:3	Hydrolases	P:GO:0006281; F:GO:0003677; F:GO:0008270	P:DNA repair; F:DNA binding; F:zinc ion binding
000001F|arrow.g1214.t1	triose-phosphate transporter family-domain-containing protein	606	0	88.81	P:GO:0006810; C:GO:0005575	P:transport; C:cellular_component			no GO terms	no GO terms
000001F|arrow.g1215.t1	anticodon-binding domain-containing protein	230	2.41627e-161	86.71					no GO terms	no GO terms
000001F|arrow.g1216.t1	6-phosphogluconate dehydrogenase	508	0	96.25	P:GO:0005975; P:GO:0006091; P:GO:0044281; F:GO:0016491	P:carbohydrate metabolic process; P:generation of precursor metabolites and energy; P:small molecule metabolic process; F:oxidoreductase activity	EC:1.1.1.44; EC:1.1; EC:1; EC:1.1.1	Phosphogluconate dehydrogenase (NADP(+)-dependent, decarboxylating); Acting on the CH-OH group of donors; Oxidoreductases; Acting on the CH-OH group of donors	P:GO:0006098; F:GO:0004616; F:GO:0016491; F:GO:0050661	P:pentose-phosphate shunt; F:phosphogluconate dehydrogenase (decarboxylating) activity; F:oxidoreductase activity; F:NADP binding
000001F|arrow.g1217.t1	RNA-binding domain-containing protein	377	0	83.66	F:GO:0003723	F:RNA binding			F:GO:0003676	F:nucleic acid binding
000001F|arrow.g1218.t1	hypothetical protein ATETN484_0009023900	173	1.43825e-82	71.72					no IPS match	no IPS match
000001F|arrow.g1219.t1	predicted protein	180	1.72614e-106	76.7	F:GO:0016746; F:GO:0016887; F:GO:0022857; F:GO:0043167; C:GO:0005886	F:transferase activity, transferring acyl groups; F:ATPase activity; F:transmembrane transporter activity; F:ion binding; C:plasma membrane	EC:2.3; EC:3.6.1; EC:3.6; EC:2; EC:3; EC:7; EC:7.2.2; EC:3.6.1.15; EC:2.3.1	Acyltransferases; Acting on acid anhydrides; Acting on acid anhydrides; Transferases; Hydrolases; Translocases; Catalysing the translocation of inorganic cations; Nucleoside-triphosphate phosphatase; Acyltransferases	F:GO:0008080	F:N-acetyltransferase activity
000001F|arrow.g1220.t1	ABC-2 type transporter-domain-containing protein	1492	0	90.7	F:GO:0016746; F:GO:0016887; F:GO:0022857; F:GO:0043167; C:GO:0005886	F:transferase activity, transferring acyl groups; F:ATPase activity; F:transmembrane transporter activity; F:ion binding; C:plasma membrane	EC:2.3; EC:3.6.1; EC:3.6; EC:2; EC:3; EC:7; EC:7.2.2; EC:3.6.1.15; EC:2.3.1	Acyltransferases; Acting on acid anhydrides; Acting on acid anhydrides; Transferases; Hydrolases; Translocases; Catalysing the translocation of inorganic cations; Nucleoside-triphosphate phosphatase; Acyltransferases	P:GO:0055085; F:GO:0005524; F:GO:0042626; C:GO:0016020; C:GO:0016021	P:transmembrane transport; F:ATP binding; F:ATPase-coupled transmembrane transporter activity; C:membrane; C:integral component of membrane
000001F|arrow.g1221.t1	amidase signature domain-containing protein	556	0	87.84					no GO terms	no GO terms
000001F|arrow.g1222.t1	amidase signature domain-containing protein	544	0	85.53	F:GO:0016810	F:hydrolase activity, acting on carbon-nitrogen (but not peptide) bonds	EC:3.5.1; EC:3.5.1.4; EC:3.5; EC:3	Acting on carbon-nitrogen bonds, other than peptide bonds; Amidase; Acting on carbon-nitrogen bonds, other than peptide bonds; Hydrolases	no GO terms	no GO terms
000001F|arrow.g1223.t1	putative cell division control protein 2 kinase	323	0	97.71	P:GO:0000278; P:GO:0006464; P:GO:0007165; P:GO:0051301; F:GO:0016301; F:GO:0043167; C:GO:0005737; C:GO:0032991	P:mitotic cell cycle; P:cellular protein modification process; P:signal transduction; P:cell division; F:kinase activity; F:ion binding; C:cytoplasm; C:protein-containing complex	EC:2.7.1; EC:2.7.11; EC:2.7.11.1; EC:2.7; EC:2; EC:2.7.11.22	Transferring phosphorus-containing groups; Transferring phosphorus-containing groups; Non-specific serine/threonine protein kinase; Transferring phosphorus-containing groups; Transferases; Cyclin-dependent kinase	P:GO:0006468; F:GO:0004672; F:GO:0005524	P:protein phosphorylation; F:protein kinase activity; F:ATP binding
000001F|arrow.g1224.t1	calpain-like protein	862	0	86.98	F:GO:0008233	F:peptidase activity	EC:3.4.22; EC:3.4.22.1; EC:3.4.99; EC:3.4.22.41; EC:3.4.22.40; EC:3.4.22.34; EC:3.4.22.8; EC:3.4.22.28; EC:3.4.22.16; EC:3.4.22.27; EC:3.4.22.38; EC:3.4.22.15; EC:3.4.22.14; EC:3.4; EC:3	Acting on peptide bonds (peptidases); Cathepsin B; Acting on peptide bonds (peptidases); Cathepsin F; Bleomycin hydrolase; Legumain; Clostripain; Picornain 3C; Cathepsin H; Cathepsin S; Cathepsin K; Cathepsin L; Actinidain; Acting on peptide bonds (peptidases); Hydrolases	P:GO:0006508; F:GO:0004198	P:proteolysis; F:calcium-dependent cysteine-type endopeptidase activity
000001F|arrow.g1225.t1	predicted protein	437	0	73.48					no IPS match	no IPS match
000001F|arrow.g1226.t1	predicted protein	439	8.74612e-150	60.2	F:GO:0003674	F:molecular_function	EC:3	Hydrolases	F:GO:0016787	F:hydrolase activity
000001F|arrow.g1227.t1	Zinc finger, C6HC-type	440	0	74.22	P:GO:0006464; F:GO:0003674	P:cellular protein modification process; F:molecular_function	EC:2	Transferases	P:GO:0016567; F:GO:0004842	P:protein ubiquitination; F:ubiquitin-protein transferase activity
000001F|arrow.g1228.t1	Zn(II)2Cys6 transcription factor	911	0	85.25	P:GO:0009058; P:GO:0034641; F:GO:0003677; F:GO:0003700; F:GO:0043167	P:biosynthetic process; P:cellular nitrogen compound metabolic process; F:DNA binding; F:DNA-binding transcription factor activity; F:ion binding			P:GO:0006351; P:GO:0006355; F:GO:0000981; F:GO:0003677; F:GO:0008270	P:transcription, DNA-templated; P:regulation of transcription, DNA-templated; F:DNA-binding transcription factor activity, RNA polymerase II-specific; F:DNA binding; F:zinc ion binding
000001F|arrow.g1229.t1	lactoylglutathione lyase	318	0	97.1	P:GO:0006790; P:GO:0009056; P:GO:0009058; P:GO:0034641; P:GO:0044281; F:GO:0003677; F:GO:0003700; F:GO:0016829; F:GO:0043167	P:sulfur compound metabolic process; P:catabolic process; P:biosynthetic process; P:cellular nitrogen compound metabolic process; P:small molecule metabolic process; F:DNA binding; F:DNA-binding transcription factor activity; F:lyase activity; F:ion binding	EC:4.4.1.5; EC:4.4; EC:4	Lactoylglutathione lyase; Carbon-sulfur lyases; Lyases	F:GO:0004462; F:GO:0046872	F:lactoylglutathione lyase activity; F:metal ion binding
000001F|arrow.g1230.t1	hypothetical protein ATETN484_0009025200	353	0	80.31					no GO terms	no GO terms
000001F|arrow.g1231.t1	PH domain protein	531	0	85.1	F:GO:0016757	F:transferase activity, transferring glycosyl groups	EC:2.4; EC:2	Glycosyltransferases; Transferases	no GO terms	no GO terms
000001F|arrow.g1232.t1	putative HECT-type ubiquitin ligase-interacting protein cred	594	0	93.22	P:GO:0006464; F:GO:0016874	P:cellular protein modification process; F:ligase activity	EC:6	Ligases	no GO terms	no GO terms
000001F|arrow.g1233.t1	Alpha/Beta hydrolase protein	276	5.21938e-125	70.9	F:GO:0003674	F:molecular_function	EC:3	Hydrolases	F:GO:0016787	F:hydrolase activity
000001F|arrow.g1234.t1	protein transport protein sft1	97	6.15098e-64	95.67	P:GO:0015031; C:GO:0005794	P:protein transport; C:Golgi apparatus			P:GO:0015031; C:GO:0030173	P:protein transport; C:integral component of Golgi membrane
000001F|arrow.g1235.t1	telomere silencing protein Zds1	823	0	83.91					no GO terms	no GO terms
000001F|arrow.g1236.t1	kinase-like domain-containing protein	378	0	89.79	F:GO:0016301	F:kinase activity	EC:2.7; EC:2	Transferring phosphorus-containing groups; Transferases	no GO terms	no GO terms
000001F|arrow.g1237.t1	DUF500-domain-containing protein	414	0	96.11	F:GO:0003674	F:molecular_function			F:GO:0005515	F:protein binding
000001F|arrow.g1238.t1	mitochondrial GTPase (Miro-2), putative	633	0	98.54	P:GO:0007005; F:GO:0003924; F:GO:0043167; C:GO:0005739	P:mitochondrion organization; F:GTPase activity; F:ion binding; C:mitochondrion	EC:3.6.1; EC:3.6; EC:3; EC:3.6.1.15	Acting on acid anhydrides; Acting on acid anhydrides; Hydrolases; Nucleoside-triphosphate phosphatase	P:GO:0007005; F:GO:0003924; F:GO:0005509; F:GO:0005525; C:GO:0031307	P:mitochondrion organization; F:GTPase activity; F:calcium ion binding; F:GTP binding; C:integral component of mitochondrial outer membrane
000001F|arrow.g1239.t1	catabolite repression protein creC	550	0	85.23	P:GO:0009058; P:GO:0034641; F:GO:0003924; F:GO:0043167; C:GO:0005739	P:biosynthetic process; P:cellular nitrogen compound metabolic process; F:GTPase activity; F:ion binding; C:mitochondrion	EC:3.6.1; EC:3.6; EC:3; EC:3.6.1.15	Acting on acid anhydrides; Acting on acid anhydrides; Hydrolases; Nucleoside-triphosphate phosphatase	F:GO:0005515	F:protein binding
000001F|arrow.g1240.t1	Ser-Thr-rich glycosyl-phosphatidyl-inositol-anchored membrane family-domain-containing protein	233	1.7676e-105	65.09					no GO terms	no GO terms
000001F|arrow.g1241.t1	predicted protein	435	3.28716e-47	61.18	F:GO:0016787	F:hydrolase activity			no GO terms	no GO terms
000001F|arrow.g1242.t1	stromal membrane-associated protein	570	0	82.18	F:GO:0016491; F:GO:0030234; F:GO:0032182	F:oxidoreductase activity; F:enzyme regulator activity; F:ubiquitin-like protein binding	EC:1; EC:1.8; EC:1.8.4; EC:1.8.4.12	Oxidoreductases; Acting on a sulfur group of donors; Acting on a sulfur group of donors; Peptide-methionine (R)-S-oxide reductase	F:GO:0005515; F:GO:0043130	F:protein binding; F:ubiquitin binding
000001F|arrow.g1243.t1	methionine-R-sulfoxide reductase SelR	213	5.41782e-117	83.53	P:GO:0006950; F:GO:0016491; F:GO:0016829; F:GO:0043167	P:response to stress; F:oxidoreductase activity; F:lyase activity; F:ion binding	EC:1; EC:1.8; EC:1.8.4; EC:4; EC:1.8.4.12	Oxidoreductases; Acting on a sulfur group of donors; Acting on a sulfur group of donors; Lyases; Peptide-methionine (R)-S-oxide reductase	P:GO:0006979; P:GO:0030091; F:GO:0016671; F:GO:0033743	P:response to oxidative stress; P:protein repair; F:oxidoreductase activity, acting on a sulfur group of donors, disulfide as acceptor; F:peptide-methionine (R)-S-oxide reductase activity
000001F|arrow.g1244.t1	stromal membrane-associated protein	581	0	86.84	F:GO:0016491; F:GO:0030234	F:oxidoreductase activity; F:enzyme regulator activity	EC:1; EC:1.8; EC:1.8.4; EC:1.8.4.12	Oxidoreductases; Acting on a sulfur group of donors; Acting on a sulfur group of donors; Peptide-methionine (R)-S-oxide reductase	F:GO:0005096	F:GTPase activator activity
000001F|arrow.g1245.t1	putative integral membrane protein	364	0	81.41	C:GO:0005575	C:cellular_component			no GO terms	no GO terms
000001F|arrow.g1246.t1	C6 transcription factor	627	0	72.64	P:GO:0009058; P:GO:0034641; F:GO:0003677; F:GO:0003700; F:GO:0016491; F:GO:0043167	P:biosynthetic process; P:cellular nitrogen compound metabolic process; F:DNA binding; F:DNA-binding transcription factor activity; F:oxidoreductase activity; F:ion binding	EC:1	Oxidoreductases	P:GO:0006351; P:GO:0006355; F:GO:0000981; F:GO:0003677; F:GO:0008270	P:transcription, DNA-templated; P:regulation of transcription, DNA-templated; F:DNA-binding transcription factor activity, RNA polymerase II-specific; F:DNA binding; F:zinc ion binding
000001F|arrow.g1247.t1	chromatin remodeling complex subunit	710	0	93.06	P:GO:0009058; P:GO:0034641; F:GO:0003677	P:biosynthetic process; P:cellular nitrogen compound metabolic process; F:DNA binding			P:GO:0006355; F:GO:0003677	P:regulation of transcription, DNA-templated; F:DNA binding
000001F|arrow.g1248.t1	predicted protein	255	4.25355e-66	63.32					no GO terms	no GO terms
000001F|arrow.g1249.t1	C6 finger domain protein [Aspergillus nomiae NRRL 13137]	780	0	89.81	P:GO:0009058; P:GO:0034641; F:GO:0003677; F:GO:0003700; F:GO:0043167	P:biosynthetic process; P:cellular nitrogen compound metabolic process; F:DNA binding; F:DNA-binding transcription factor activity; F:ion binding			P:GO:0006355; F:GO:0000981; F:GO:0008270	P:regulation of transcription, DNA-templated; F:DNA-binding transcription factor activity, RNA polymerase II-specific; F:zinc ion binding
000001F|arrow.g1250.t1	copper fist DNA binding domain protein	520	0	85.53	P:GO:0009058; P:GO:0034641; F:GO:0003677; F:GO:0003700; F:GO:0043167; C:GO:0005634	P:biosynthetic process; P:cellular nitrogen compound metabolic process; F:DNA binding; F:DNA-binding transcription factor activity; F:ion binding; C:nucleus			P:GO:0006355; F:GO:0003677; F:GO:0003700; F:GO:0005507; C:GO:0005634	P:regulation of transcription, DNA-templated; F:DNA binding; F:DNA-binding transcription factor activity; F:copper ion binding; C:nucleus
000001F|arrow.g1251.t1	pyridoxal phosphate-dependent transferase	495	0	94.4	P:GO:0009058; F:GO:0043167	P:biosynthetic process; F:ion binding	EC:2.6.1; EC:2; EC:2.6	Transferring nitrogenous groups; Transferases; Transferring nitrogenous groups	P:GO:0009058; F:GO:0003824; F:GO:0030170	P:biosynthetic process; F:catalytic activity; F:pyridoxal phosphate binding
000001F|arrow.g1252.t1	26S proteasome subunit RPN7-domain-containing protein	490	0	96.44	P:GO:0007059; P:GO:0051276; P:GO:0140014; F:GO:0005198; F:GO:0030234; C:GO:0005622; C:GO:0032991	P:chromosome segregation; P:chromosome organization; P:mitotic nuclear division; F:structural molecule activity; F:enzyme regulator activity; C:intracellular anatomical structure; C:protein-containing complex			F:GO:0030234	F:enzyme regulator activity
000001F|arrow.g1253.t1	major facilitator superfamily domain-containing protein	494	0	93.65	F:GO:0022857; C:GO:0005575	F:transmembrane transporter activity; C:cellular_component	EC:7	Translocases	P:GO:0055085; F:GO:0022857; C:GO:0016021	P:transmembrane transport; F:transmembrane transporter activity; C:integral component of membrane
000001F|arrow.g1254.t1	peroxisomal biogenesis factor	235	1.65313e-169	98.6	P:GO:0006629; P:GO:0044281; C:GO:0005777	P:lipid metabolic process; P:small molecule metabolic process; C:peroxisome			P:GO:0016559; C:GO:0005779	P:peroxisome fission; C:integral component of peroxisomal membrane
000001F|arrow.g1255.t1	sodium ion/proton exchanger	568	0	85.36	F:GO:0022857; C:GO:0005575	F:transmembrane transporter activity; C:cellular_component	EC:7	Translocases	P:GO:0006812; P:GO:0055085; F:GO:0015299; C:GO:0016021	P:cation transport; P:transmembrane transport; F:solute:proton antiporter activity; C:integral component of membrane
000001F|arrow.g1256.t1	phosphoenolpyruvate carboxykinase	556	0	98.56	P:GO:0005975; P:GO:0006091; P:GO:0009056; P:GO:0009058; P:GO:0034641; P:GO:0044281; F:GO:0016301; F:GO:0016829; F:GO:0043167; C:GO:0005829	P:carbohydrate metabolic process; P:generation of precursor metabolites and energy; P:catabolic process; P:biosynthetic process; P:cellular nitrogen compound metabolic process; P:small molecule metabolic process; F:kinase activity; F:lyase activity; F:ion binding; C:cytosol	EC:4.1.1; EC:4.1; EC:4.1.1.49; EC:2.7; EC:2; EC:4; EC:4.1.1.32	Carbon-carbon lyases; Carbon-carbon lyases; Phosphoenolpyruvate carboxykinase (ATP); Transferring phosphorus-containing groups; Transferases; Lyases; Phosphoenolpyruvate carboxykinase (GTP)	P:GO:0006094; F:GO:0004611; F:GO:0004612; F:GO:0005524; F:GO:0017076	P:gluconeogenesis; F:phosphoenolpyruvate carboxykinase activity; F:phosphoenolpyruvate carboxykinase (ATP) activity; F:ATP binding; F:purine nucleotide binding
000001F|arrow.g1257.t1	mitochondrial carrier domain-containing protein	312	0	95.75	F:GO:0022857; C:GO:0005739	F:transmembrane transporter activity; C:mitochondrion	EC:7	Translocases	P:GO:0055085	P:transmembrane transport
000001F|arrow.g1258.t1	chromosomal organization and DNA repair protein Mms21, putative	462	0	72.57	P:GO:0006259; P:GO:0006397; P:GO:0006464; P:GO:0006950; F:GO:0003723; F:GO:0008168; F:GO:0016853; F:GO:0043167; C:GO:0005694; C:GO:0032991	P:DNA metabolic process; P:mRNA processing; P:cellular protein modification process; P:response to stress; F:RNA binding; F:methyltransferase activity; F:isomerase activity; F:ion binding; C:chromosome; C:protein-containing complex	EC:2.1; EC:5.2.1.8; EC:5.2; EC:2; EC:2.1.1.56; EC:5; EC:2.1.1	Transferring one-carbon groups; Peptidylprolyl isomerase; Cis-trans-isomerases; Transferases; mRNA (guanine-N(7)-)-methyltransferase; Isomerases; Transferring one-carbon groups	P:GO:0000724; P:GO:0016567; F:GO:0004842; F:GO:0008270; F:GO:0019789; C:GO:0030915	P:double-strand break repair via homologous recombination; P:protein ubiquitination; F:ubiquitin-protein transferase activity; F:zinc ion binding; F:SUMO transferase activity; C:Smc5-Smc6 complex
000001F|arrow.g1259.t1	mRNA cap guanine-N7 methyltransferase	536	0	87.67	P:GO:0006397; P:GO:0006464; F:GO:0003723; F:GO:0008168; F:GO:0016853; F:GO:0043167	P:mRNA processing; P:cellular protein modification process; F:RNA binding; F:methyltransferase activity; F:isomerase activity; F:ion binding	EC:2.1; EC:5.2.1.8; EC:5.2; EC:2; EC:2.1.1.56; EC:5; EC:2.1.1	Transferring one-carbon groups; Peptidylprolyl isomerase; Cis-trans-isomerases; Transferases; mRNA (guanine-N(7)-)-methyltransferase; Isomerases; Transferring one-carbon groups	F:GO:0004482	F:mRNA (guanine-N7-)-methyltransferase activity
000001F|arrow.g1260.t1	flavo protein monooxygenase	447	0	75.96	F:GO:0043167; C:GO:0005575	F:ion binding; C:cellular_component			F:GO:0071949	F:FAD binding
000001F|arrow.g1261.t1	predicted protein	448	0	79.82	F:GO:0043167	F:ion binding			F:GO:0008270	F:zinc ion binding
000001F|arrow.g1262.t1	cytochrome oxidase assembly protein-domain-containing protein	502	0	92.68	P:GO:0009058; P:GO:0034641; F:GO:0016491; C:GO:0005575	P:biosynthetic process; P:cellular nitrogen compound metabolic process; F:oxidoreductase activity; C:cellular_component	EC:1.3; EC:1	Acting on the CH-CH group of donors; Oxidoreductases	P:GO:0006784; F:GO:0016627; C:GO:0016020; C:GO:0016021	P:heme A biosynthetic process; F:oxidoreductase activity, acting on the CH-CH group of donors; C:membrane; C:integral component of membrane
000001F|arrow.g1263.t1	predicted protein	407	7.8073e-94	72.14					no GO terms	no GO terms
000001F|arrow.g1264.t1	lysyl-tRNA synthetase	605	0	97.1	P:GO:0006399; P:GO:0006412; P:GO:0006520; F:GO:0003723; F:GO:0016874; F:GO:0043167; C:GO:0005829	P:tRNA metabolic process; P:translation; P:cellular amino acid metabolic process; F:RNA binding; F:ligase activity; F:ion binding; C:cytosol	EC:6.1; EC:6.1.1.6; EC:6.1.1; EC:6	Forming carbon-oxygen bonds; Lysine--tRNA ligase; Forming carbon-oxygen bonds; Ligases	P:GO:0006418; P:GO:0006430; F:GO:0000166; F:GO:0003676; F:GO:0004812; F:GO:0004824; F:GO:0005524; C:GO:0005737	P:tRNA aminoacylation for protein translation; P:lysyl-tRNA aminoacylation; F:nucleotide binding; F:nucleic acid binding; F:aminoacyl-tRNA ligase activity; F:lysine-tRNA ligase activity; F:ATP binding; C:cytoplasm
000001F|arrow.g1265.t1	interferon-induced GTP-binding protein Mx	791	0	83.71	F:GO:0003924; F:GO:0043167	F:GTPase activity; F:ion binding	EC:3.6.1; EC:3.6; EC:3; EC:3.6.1.15	Acting on acid anhydrides; Acting on acid anhydrides; Hydrolases; Nucleoside-triphosphate phosphatase	F:GO:0003924; F:GO:0005525	F:GTPase activity; F:GTP binding
000001F|arrow.g1266.t1	nucleotide-diphospho-sugar transferase	437	0	98.74	P:GO:0009058; P:GO:0034641; P:GO:0044281; F:GO:0016779; F:GO:0043167	P:biosynthetic process; P:cellular nitrogen compound metabolic process; P:small molecule metabolic process; F:nucleotidyltransferase activity; F:ion binding	EC:2.7; EC:2; EC:2.7.7; EC:2.7.7.13	Transferring phosphorus-containing groups; Transferases; Transferring phosphorus-containing groups; Mannose-1-phosphate guanylyltransferase	P:GO:0009058; F:GO:0016740; F:GO:0016779	P:biosynthetic process; F:transferase activity; F:nucleotidyltransferase activity
000001F|arrow.g1267.t1	predicted protein	332	0	66.69	C:GO:0005575	C:cellular_component			no GO terms	no GO terms
000001F|arrow.g1268.t1	oxidoreductase FAD-binding protein	784	0	76.09	F:GO:0016491	F:oxidoreductase activity	EC:1	Oxidoreductases	F:GO:0016491	F:oxidoreductase activity
000001F|arrow.g1269.t1	essential cytoplasmic protein Ctr86	918	0	96.39	P:GO:0006520; P:GO:0009058; F:GO:0016746; C:GO:0005575	P:cellular amino acid metabolic process; P:biosynthetic process; F:transferase activity, transferring acyl groups; C:cellular_component	EC:2.3; EC:2; EC:2.3.1	Acyltransferases; Transferases; Acyltransferases	no GO terms	no GO terms
000001F|arrow.g1270.t1	DHHC zinc finger domain protein	203	8.89543e-138	83.3	F:GO:0016746; C:GO:0005575	F:transferase activity, transferring acyl groups; C:cellular_component	EC:2.3; EC:2; EC:2.3.1.225; EC:2.3.1	Acyltransferases; Transferases; Protein S-acyltransferase; Acyltransferases	no GO terms	no GO terms
000001F|arrow.g1271.t1	heterochromatin protein, putative	231	2.63619e-124	79.82	C:GO:0005634	C:nucleus			C:GO:0005634	C:nucleus
000001F|arrow.g1272.t1	T-complex protein 1 subunit epsilon	548	0	99.07	P:GO:0006457; F:GO:0016887; F:GO:0043167; F:GO:0051082	P:protein folding; F:ATPase activity; F:ion binding; F:unfolded protein binding	EC:3.6.1; EC:3.6; EC:3; EC:3.6.1.15	Acting on acid anhydrides; Acting on acid anhydrides; Hydrolases; Nucleoside-triphosphate phosphatase	P:GO:0006457; F:GO:0005524; F:GO:0016887; F:GO:0051082	P:protein folding; F:ATP binding; F:ATPase activity; F:unfolded protein binding
000001F|arrow.g1273.t1	DUF1752-domain-containing protein	568	0	89.8					no GO terms	no GO terms
000001F|arrow.g1274.t1	cytochrome P450	514	0	89.51	P:GO:0008150; F:GO:0008168; F:GO:0016491; F:GO:0043167; C:GO:0005575	P:biological_process; F:methyltransferase activity; F:oxidoreductase activity; F:ion binding; C:cellular_component	EC:2.1; EC:1; EC:1.14; EC:2; EC:2.1.1	Transferring one-carbon groups; Oxidoreductases; Acting on paired donors, with incorporation or reduction of molecular oxygen. The oxygen incorporated need not be derived from O(2); Transferases; Transferring one-carbon groups	F:GO:0004497; F:GO:0005506; F:GO:0016705; F:GO:0020037	F:monooxygenase activity; F:iron ion binding; F:oxidoreductase activity, acting on paired donors, with incorporation or reduction of molecular oxygen; F:heme binding
000001F|arrow.g1275.t1	CHY zinc finger domain protein	616	0	73.44	F:GO:0043167	F:ion binding			F:GO:0008270	F:zinc ion binding
[truncated: 9,547 more rows]

## Sheet: analyses
	GO Terms
[truncated: 62 more rows]
