# Supplementary material for: Genome Mining and Molecular Networking-Based Metabolomics of the Marine Facultative Aspergillus sp. MEXU 27854
Source: Molecules. 2021 Sep 3;26(17):5362. doi: 10.3390/molecules26175362 (PMC8433890; doi:10.3390/molecules26175362)
Supplement: Supplementary file 1 [file molecules-26-05362-s001.zip › Table S3_KEGG pathway classification in the Aspergillus sp. MEXU 27854 genome_draft02.xlsx]

## Sheet: kegg
Table S3. KEGG pathway classification in the Aspergillus sp. MEXU 27854 genome
Enzyme	Pathway	Pathway ID	#Enzs in Pathway	#Seqs in Pathway	Seqs
ec:1.1.1.4 - dehydrogenase	Butanoate metabolism	map00650	19	1	000001F|arrow.g521.t1
ec:2.8.1.12 - synthase	Folate biosynthesis	map00790	19	1	000002F|arrow.g2229.t1
ec:4.99.1.1 - ferrochelatase	Porphyrin and chlorophyll metabolism	map00860	15	1	000005F|arrow.g4201.t1
ec:1.1.1.14 - 2-dehydrogenase	Pentose and glucuronate interconversions, Fructose and mannose metabolism	map00040, map00051	16, 23	1	000003F|arrow.g5557.t1
ec:4.1.1.1 - decarboxylase	Glycolysis / Gluconeogenesis	map00010	25	1	000001F|arrow.g166.t1
ec:4.2.1.79 - dehydratase	Propanoate metabolism	map00640	16	1	000005F|arrow.g3352.t1
ec:1.6.2.2 - reductase	Amino sugar and nucleotide sugar metabolism	map00520	32	1	000002F|arrow.g2651.t1
ec:5.1.1.10 - racemase	Cysteine and methionine metabolism, D-Arginine and D-ornithine metabolism, D-Glutamine and D-glutamate metabolism, Glycine, serine and threonine metabolism	map00270, map00472, map00471, map00260	27, 2, 3, 27	1	000002F|arrow.g2822.t1
ec:3.1.1.11 - pectin demethoxylase	Pentose and glucuronate interconversions	map00040	16	1	000002F|arrow.g2307.t1
ec:3.2.1.51 - alpha-fucosidase	Other glycan degradation	map00511	7	1	000002F|arrow.g2468.t1
ec:1.1.1.284 - dehydrogenase	Methane metabolism	map00680	16	1	000005F|arrow.g3485.t1
ec:3.1.1.3 - lipase	Glycerolipid metabolism	map00561	13	1	000001F|arrow.g767.t1
ec:2.2.1.1 - glycolaldehydetransferase	Pentose phosphate pathway, Carbon fixation in photosynthetic organisms, Biosynthesis of ansamycins	map00030, map00710, map01051	15, 14, 1	1	000002F|arrow.g1695.t1
ec:6.1.1.6 - ligase	Aminoacyl-tRNA biosynthesis	map00970	22	1	000001F|arrow.g797.t1
ec:1.1.1.169 - 2-reductase	Pantothenate and CoA biosynthesis	map00770	13	1	000001F|arrow.g1093.t1
ec:1.1.1.95 - dehydrogenase	Cysteine and methionine metabolism, Methane metabolism, Glycine, serine and threonine metabolism	map00270, map00680, map00260	27, 16, 27	1	000001F|arrow.g889.t1
ec:4.2.1.104 - cyanate lyase	Nitrogen metabolism	map00910	13	1	000001F|arrow.g426.t1
ec:2.7.4.8 - kinase	Purine metabolism	map00230	49	1	000005F|arrow.g3264.t1
ec:3.4.17.21 - carboxypeptidase II	Alanine, aspartate and glutamate metabolism	map00250	24	1	000001F|arrow.g467.t1
ec:2.5.1.29 - diphosphate synthase	Terpenoid backbone biosynthesis	map00900	13	1	000006F|arrow.g4799.t1
ec:3.1.3.27 - phosphatidylglycerol phosphate phosphatase	Glycerophospholipid metabolism	map00564	18	1	000003F|arrow.g5493.t1
ec:6.1.1.1 - ligase	Aminoacyl-tRNA biosynthesis	map00970	22	1	000006F|arrow.g4801.t1
ec:2.4.2.22 - phosphoribosyltransferase	Purine metabolism	map00230	49	1	000001F|arrow.g956.t1
ec:2.2.1.2 - dihydroxyacetonetransferase	Pentose phosphate pathway	map00030	15	1	000004F|arrow.g8764.t1
ec:1.1.1.22 - 6-dehydrogenase	Amino sugar and nucleotide sugar metabolism, Ascorbate and aldarate metabolism, O-Antigen nucleotide sugar biosynthesis, Pentose and glucuronate interconversions	map00520, map00053, map00541, map00040	32, 7, 7, 16	1	000006F|arrow.g4525.t1
ec:2.3.1.85 - synthase system	Fatty acid biosynthesis	map00061	10	1	000001F|arrow.g119.t1
ec:6.3.4.5 - synthase	Alanine, aspartate and glutamate metabolism, Arginine biosynthesis	map00250, map00220	24, 16	1	000004F|arrow.g9242.t1
ec:1.16.3.1 - ceruloplasmin	Porphyrin and chlorophyll metabolism	map00860	15	1	000004F|arrow.g9434.t1
ec:2.5.1.1 - geranyl-diphosphate synthase	Terpenoid backbone biosynthesis	map00900	13	1	000002F|arrow.g1827.t1
ec:4.3.2.2 - lyase	Alanine, aspartate and glutamate metabolism, Purine metabolism	map00250, map00230	24, 49	1	000002F|arrow.g2919.t1
ec:4.2.1.22 - beta-synthase	Cysteine and methionine metabolism, Glycine, serine and threonine metabolism	map00270, map00260	27, 27	1	000003F|arrow.g5965.t1
ec:2.4.1.258 - alpha-1,3-mannosyltransferase	N-Glycan biosynthesis, Various types of N-glycan biosynthesis	map00510, map00513	21, 12	1	000001F|arrow.g177.t1
ec:2.3.1.86 - synthase system	Fatty acid biosynthesis	map00061	10	1	000000F|arrow.g7744.t1
ec:2.4.2.7 - phosphoribosyltransferase	Purine metabolism	map00230	49	1	000002F|arrow.g2147.t1
ec:2.7.1.1 - hexokinase type IV glucokinase	Amino sugar and nucleotide sugar metabolism, Neomycin, kanamycin and gentamicin biosynthesis, Galactose metabolism, Glycolysis / Gluconeogenesis, Starch and sucrose metabolism, Streptomycin biosynthesis, Fructose and mannose metabolism	map00520, map00524, map00052, map00010, map00500, map00521, map00051	32, 2, 17, 25, 24, 4, 23	1	000001F|arrow.g553.t1
ec:1.14.13.7 - 2-monooxygenase (NADPH)	Toluene degradation, Aminobenzoate degradation	map00623, map00627	4, 6	1	000007F|arrow.g9955.t1
ec:2.6.1.44 - transaminase	Cysteine and methionine metabolism, Alanine, aspartate and glutamate metabolism, Glycine, serine and threonine metabolism	map00270, map00250, map00260	27, 24, 27	1	000004F|arrow.g9195.t1
ec:1.2.1.3 - dehydrogenase (NAD+)	Limonene and pinene degradation, Ascorbate and aldarate metabolism, Glycerolipid metabolism, Fatty acid degradation, Arginine and proline metabolism, Tryptophan metabolism, Histidine metabolism, Chloroalkane and chloroalkene degradation, Pantothenate and CoA biosynthesis, Insect hormone biosynthesis, Pyruvate metabolism, beta-Alanine metabolism, Glycolysis / Gluconeogenesis, Lysine degradation, V…	map00903, map00053, map00561, map00071, map00330, map00380, map00340, map00625, map00770, map00981, map00620, map00410, map00010, map00310, map00280	2, 7, 13, 10, 14, 17, 11, 3, 13, 1, 28, 11, 25, 11, 16	4	000005F|arrow.g3685.t1, 000005F|arrow.g4142.t1, 000000F|arrow.g8029.t1, 000000F|arrow.g8230.t1
ec:2.7.1.153 - 3-kinase	Human immunodeficiency virus 1 infection, Human cytomegalovirus infection, mTOR signaling pathway, Human papillomavirus infection, PI3K-Akt signaling pathway, Inositol phosphate metabolism, Phosphatidylinositol signaling system	map05170, map05163, map04150, map05165, map04151, map00562, map04070	2, 2, 4, 2, 2, 16, 16	1	000007F|arrow.g10231.t1
ec:2.3.3.13 - synthase	Pyruvate metabolism, Valine, leucine and isoleucine biosynthesis	map00620, map00290	28, 8	1	000003F|arrow.g5329.t1
ec:3.3.1.1 - S-adenosylhomocysteine synthase	Cysteine and methionine metabolism	map00270	27	1	000005F|arrow.g3824.t1
ec:2.7.2.3 - kinase	Glycolysis / Gluconeogenesis, Carbon fixation in photosynthetic organisms	map00010, map00710	25, 14	1	000005F|arrow.g3901.t1
ec:1.1.3.37 - oxidase	Ascorbate and aldarate metabolism	map00053	7	3	000000F|arrow.g8191.t1, 000003F|arrow.g5325.t1, 000004F|arrow.g9839.t1
ec:4.2.2.2 - lyase	Pentose and glucuronate interconversions	map00040	16	1	000006F|arrow.g4910.t1
ec:2.1.1.64 - 3-O-methyltransferase	Ubiquinone and other terpenoid-quinone biosynthesis	map00130	6	1	000003F|arrow.g5509.t1
ec:3.1.2.1 - hydrolase	Pyruvate metabolism	map00620	28	1	000003F|arrow.g6373.t1
ec:2.4.1.260 - alpha-1,6-mannosyltransferase	N-Glycan biosynthesis, Various types of N-glycan biosynthesis	map00510, map00513	21, 12	1	000000F|arrow.g8104.t1
ec:2.7.8.13 - MraY transferase	Peptidoglycan biosynthesis	map00550	4	1	000002F|arrow.g2592.t1
ec:3.1.2.4 - hydrolase	beta-Alanine metabolism, Propanoate metabolism, Valine, leucine and isoleucine degradation	map00410, map00640, map00280	11, 16, 16	1	000001F|arrow.g86.t1
ec:4.2.1.6 - dehydratase	Galactose metabolism	map00052	17	1	000001F|arrow.g1384.t1
ec:2.1.2.3 - formyltransferase	Purine metabolism, One carbon pool by folate	map00230, map00670	49, 12	1	000006F|arrow.g4882.t1
ec:2.7.1.23 - kinase	Nicotinate and nicotinamide metabolism	map00760	12	6	000000F|arrow.g7750.t1, 000005F|arrow.g3452.t1, 000001F|arrow.g92.t1, 000002F|arrow.g2085.t1, 000005F|arrow.g3973.t1, 000000F|arrow.g7751.t1
ec:4.1.1.33 - decarboxylase	Terpenoid backbone biosynthesis	map00900	13	1	000006F|arrow.g4942.t1
ec:2.8.1.4 - uracil 4-sulfurtransferase	Thiamine metabolism	map00730	11	1	000001F|arrow.g132.t1
ec:2.6.1.42 - transaminase	Pantothenate and CoA biosynthesis, Cysteine and methionine metabolism, Valine, leucine and isoleucine biosynthesis, Glucosinolate biosynthesis, Valine, leucine and isoleucine degradation	map00770, map00270, map00290, map00966, map00280	13, 27, 8, 1, 16	1	000000F|arrow.g7034.t1
ec:1.1.1.193 - reductase	Riboflavin metabolism	map00740	10	1	000001F|arrow.g977.t1
ec:2.4.1.132 - alpha-1,3-mannosyltransferase	N-Glycan biosynthesis, Various types of N-glycan biosynthesis	map00510, map00513	21, 12	1	000001F|arrow.g1571.t1
ec:7.1.1.9 - oxidase	Oxidative phosphorylation	map00190	7	1	000002F|arrow.g1869.t1
ec:7.1.2.1 - H+-exporting transporter	Oxidative phosphorylation	map00190	7	1	000002F|arrow.g2306.t1
ec:4.3.1.18 - ammonia-lyase	Glycine, serine and threonine metabolism	map00260	27	1	000001F|arrow.g287.t1
ec:3.2.1.15 - pectin depolymerase (ambiguous)	Pentose and glucuronate interconversions	map00040	16	1	000001F|arrow.g1114.t1
ec:3.1.2.6 - hydrolase	Pyruvate metabolism	map00620	28	1	000001F|arrow.g89.t1
ec:1.7.2.1 - reductase (NO-forming)	Nitrogen metabolism	map00910	13	1	000005F|arrow.g3376.t1
ec:1.13.11.5 - 1,2-dioxygenase	Tyrosine metabolism, Styrene degradation	map00350, map00643	11, 3	1	000001F|arrow.g1278.t1
ec:2.7.1.36 - kinase	Terpenoid backbone biosynthesis	map00900	13	1	000006F|arrow.g4865.t1
ec:1.3.1.12 - dehydrogenase	Phenylalanine, tyrosine and tryptophan biosynthesis, Novobiocin biosynthesis	map00400, map00401	19, 3	1	000002F|arrow.g2505.t1
ec:2.7.1.68 - 5-kinase	Inositol phosphate metabolism, Phosphatidylinositol signaling system	map00562, map04070	16, 16	1	000007F|arrow.g10231.t1
ec:1.1.1.8 - dehydrogenase (NAD+)	Glycerophospholipid metabolism	map00564	18	1	000001F|arrow.g335.t1
ec:2.7.7.12 - uridylyltransferase	Amino sugar and nucleotide sugar metabolism, Galactose metabolism	map00520, map00052	32, 17	1	000002F|arrow.g2624.t1
ec:1.1.1.38 - dehydrogenase (oxaloacetate-decarboxylating)	Pyruvate metabolism	map00620	28	1	000002F|arrow.g2139.t1
ec:4.1.3.27 - synthase	Phenylalanine, tyrosine and tryptophan biosynthesis, Phenazine biosynthesis	map00400, map00405	19, 1	1	000003F|arrow.g5687.t1
ec:1.3.3.4 - oxidase	Porphyrin and chlorophyll metabolism	map00860	15	1	000001F|arrow.g1186.t1
ec:1.4.1.2 - dehydrogenase	Nitrogen metabolism, Alanine, aspartate and glutamate metabolism, Arginine biosynthesis, Taurine and hypotaurine metabolism	map00910, map00250, map00220, map00430	13, 24, 16, 5	1	000004F|arrow.g9050.t1
ec:1.2.1.88 - gamma-semialdehyde dehydrogenase	Arginine and proline metabolism, Alanine, aspartate and glutamate metabolism	map00330, map00250	14, 24	1	000002F|arrow.g2739.t1
ec:1.14.11.17 - dioxygenase	Sulfur metabolism, Taurine and hypotaurine metabolism	map00920, map00430	8, 5	1	000002F|arrow.g1723.t1
ec:1.11.1.9 - peroxidase	Arachidonic acid metabolism, Glutathione metabolism	map00590, map00480	4, 12	1	000004F|arrow.g9283.t1
ec:3.3.2.1 - 2,3-dihydro-2,3-dihydroxybenzoate synthase	Biosynthesis of siderophore group nonribosomal peptides	map01053	1	1	000004F|arrow.g9259.t1
ec:4.2.1.33 - dehydratase	Valine, leucine and isoleucine biosynthesis	map00290	8	1	000002F|arrow.g2594.t1
ec:6.3.2.4 - ligase	D-Alanine metabolism, Peptidoglycan biosynthesis	map00473, map00550	1, 4	1	000002F|arrow.g2643.t1
ec:1.1.2.3 - dehydrogenase (cytochrome)	Pyruvate metabolism	map00620	28	2	000000F|arrow.g7181.t1, 000006F|arrow.g4966.t1
ec:1.1.1.1 - dehydrogenase	Naphthalene degradation, Tyrosine metabolism, Retinol metabolism, Drug metabolism - cytochrome P450, Pyruvate metabolism, Metabolism of xenobiotics by cytochrome P450, Fatty acid degradation, Glycolysis / Gluconeogenesis, alpha-Linolenic acid metabolism, Chloroalkane and chloroalkene degradation, Glycine, serine and threonine metabolism	map00626, map00350, map00830, map00982, map00620, map00980, map00071, map00010, map00592, map00625, map00260	2, 11, 2, 5, 28, 6, 10, 25, 4, 3, 27	1	000005F|arrow.g3485.t1
ec:6.1.1.17 - ligase	Porphyrin and chlorophyll metabolism, Aminoacyl-tRNA biosynthesis	map00860, map00970	15, 22	1	000001F|arrow.g480.t1
ec:1.2.4.1 - dehydrogenase (acetyl-transferring)	Citrate cycle (TCA cycle), Pyruvate metabolism, Glycolysis / Gluconeogenesis	map00020, map00620, map00010	17, 28, 25	1	000001F|arrow.g1371.t1
ec:4.2.1.24 - synthase	Porphyrin and chlorophyll metabolism	map00860	15	1	000004F|arrow.g9101.t1
ec:2.7.2.11 - 5-kinase	Carbapenem biosynthesis, Arginine and proline metabolism	map00332, map00330	2, 14	1	000003F|arrow.g5970.t1
ec:1.2.1.16 - dehydrogenase [NAD(P)+]	Tyrosine metabolism, Nicotinate and nicotinamide metabolism, Butanoate metabolism, Alanine, aspartate and glutamate metabolism	map00350, map00760, map00650, map00250	11, 12, 19, 24	1	000006F|arrow.g4824.t1
ec:4.2.1.59 - dehydratase	Biotin metabolism, Fatty acid biosynthesis	map00780, map00061	6, 10	1	000000F|arrow.g7745.t1
ec:2.4.2.18 - phosphoribosyltransferase	Phenylalanine, tyrosine and tryptophan biosynthesis	map00400	19	1	000004F|arrow.g9539.t1
ec:1.7.3.3 - urate hydroxylase	Caffeine metabolism, Purine metabolism	map00232, map00230	4, 49	1	000002F|arrow.g2512.t1
ec:4.6.1.17 - pyranopterin monophosphate synthase	Folate biosynthesis	map00790	19	1	000006F|arrow.g4278.t1
ec:1.2.1.12 - dehydrogenase (phosphorylating)	Glycolysis / Gluconeogenesis, Carbon fixation in photosynthetic organisms	map00010, map00710	25, 14	1	000005F|arrow.g4116.t1
ec:6.1.1.20 - ligase	Aminoacyl-tRNA biosynthesis	map00970	22	1	000002F|arrow.g2789.t1
ec:2.6.1.13 - aminotransferase	Arginine and proline metabolism	map00330	14	1	000006F|arrow.g4736.t1
ec:6.1.1.11 - ligase	Aminoacyl-tRNA biosynthesis	map00970	22	1	000002F|arrow.g2120.t1
ec:1.8.3.5 - oxidase	Terpenoid backbone biosynthesis	map00900	13	1	000002F|arrow.g2480.t1
ec:3.1.4.53 - phosphodiesterase	Purine metabolism	map00230	49	1	000003F|arrow.g5321.t1
ec:4.1.3.3 - lyase	Amino sugar and nucleotide sugar metabolism	map00520	32	1	000005F|arrow.g4141.t1
ec:2.7.4.3 - kinase	Thiamine metabolism, Purine metabolism	map00730, map00230	11, 49	1	000001F|arrow.g718.t1
ec:3.1.3.7 - nucleotidase	Sulfur metabolism	map00920	8	1	000004F|arrow.g8938.t1
ec:1.13.11.6 - 3,4-dioxygenase	Tryptophan metabolism	map00380	17	1	000005F|arrow.g3766.t1
ec:4.2.1.66 - hydratase	Cyanoamino acid metabolism	map00460	5	1	000000F|arrow.g8142.t1
ec:2.7.4.10 - kinase	Purine metabolism	map00230	49	1	000001F|arrow.g718.t1
ec:1.1.1.39 - dehydrogenase (decarboxylating)	Pyruvate metabolism, Carbon fixation in photosynthetic organisms	map00620, map00710	28, 14	1	000002F|arrow.g2139.t1
ec:1.11.1.6 - equilase	Glyoxylate and dicarboxylate metabolism, Tryptophan metabolism	map00630, map00380	21, 17	1	000002F|arrow.g1642.t1
ec:1.8.1.2 - sulfite reductase (NADPH)	Sulfur metabolism	map00920	8	1	000001F|arrow.g567.t1
ec:2.3.1.9 - C-acetyltransferase	Terpenoid backbone biosynthesis, Synthesis and degradation of ketone bodies, Pyruvate metabolism, Carbon fixation pathways in prokaryotes, Glyoxylate and dicarboxylate metabolism, Fatty acid degradation, Propanoate metabolism, Tryptophan metabolism, Lysine degradation, Butanoate metabolism, Benzoate degradation, Valine, leucine and isoleucine degradation	map00900, map00072, map00620, map00720, map00630, map00071, map00640, map00380, map00310, map00650, map00362, map00280	13, 4, 28, 21, 21, 10, 16, 17, 11, 19, 7, 16	1	000005F|arrow.g3677.t1
ec:6.2.1.1 - ligase	Pyruvate metabolism, Carbon fixation pathways in prokaryotes, Glyoxylate and dicarboxylate metabolism, Glycolysis / Gluconeogenesis, Propanoate metabolism, Methane metabolism	map00620, map00720, map00630, map00010, map00640, map00680	28, 21, 21, 25, 16, 16	1	000003F|arrow.g5368.t1
ec:1.1.1.62 - 17-dehydrogenase	Steroid hormone biosynthesis	map00140	4	1	000002F|arrow.g2842.t1
ec:3.5.99.7 - deaminase	Cysteine and methionine metabolism	map00270	27	1	000005F|arrow.g3490.t1
ec:6.6.1.1 - chelatase	Porphyrin and chlorophyll metabolism	map00860	15	1	000001F|arrow.g1533.t1
ec:3.1.3.54 - 6-phosphatase	Fructose and mannose metabolism	map00051	23	1	000000F|arrow.g6933.t1
ec:3.1.2.14 - hydrolase	Fatty acid biosynthesis	map00061	10	1	000000F|arrow.g7745.t1
ec:3.5.1.5 - ec:3.5.1.5 urease	Atrazine degradation, Purine metabolism, Arginine biosynthesis	map00791, map00230, map00220	1, 49, 16	1	000004F|arrow.g9706.t1
ec:4.2.1.134 - (3R)-3-hydroxyacyl-CoA dehydratase	Fatty acid elongation, Biosynthesis of unsaturated fatty acids	map00062, map01040	7, 6	1	000003F|arrow.g5496.t1
ec:2.5.1.54 - synthase	Phenylalanine, tyrosine and tryptophan biosynthesis	map00400	19	1	000002F|arrow.g1679.t1
ec:2.4.1.117 - beta-glucosyltransferase	N-Glycan biosynthesis	map00510	21	1	000005F|arrow.g4147.t1
ec:3.1.3.37 - SBPase	Carbon fixation in photosynthetic organisms	map00710	14	1	000005F|arrow.g3233.t1
ec:2.8.1.8 - synthase	Lipoic acid metabolism	map00785	2	1	000007F|arrow.g10321.t1
ec:1.13.11.54 - dioxygenase [iron(II)-requiring]	Cysteine and methionine metabolism	map00270	27	1	000002F|arrow.g3039.t1
ec:2.5.1.34 - synthase	Indole alkaloid biosynthesis	map00901	2	1	000004F|arrow.g8529.t1
ec:2.7.4.9 - kinase	Pyrimidine metabolism	map00240	24	1	000005F|arrow.g3560.t1
ec:2.4.1.267 - alpha-1,3-glucosyltransferase	N-Glycan biosynthesis	map00510	21	1	000002F|arrow.g2312.t1
ec:6.1.1.5 - ligase	Aminoacyl-tRNA biosynthesis	map00970	22	1	000003F|arrow.g5622.t1
ec:3.1.2.12 - hydrolase	Methane metabolism	map00680	16	1	000004F|arrow.g8726.t1
ec:1.1.1.44 - dehydrogenase (NADP+-dependent, decarboxylating)	Pentose phosphate pathway, Glutathione metabolism	map00030, map00480	15, 12	1	000001F|arrow.g1216.t1
ec:1.3.1.98 - dehydrogenase	Amino sugar and nucleotide sugar metabolism, Peptidoglycan biosynthesis	map00520, map00550	32, 4	1	000002F|arrow.g1961.t1
ec:6.3.5.3 - synthase	Purine metabolism	map00230	49	1	000002F|arrow.g1866.t1
ec:3.5.1.25 - deacetylase	Amino sugar and nucleotide sugar metabolism, Galactose metabolism	map00520, map00052	32, 17	1	000005F|arrow.g3687.t1
ec:2.7.1.107 - kinase (ATP)	Glycerophospholipid metabolism, Glycerolipid metabolism, Phosphatidylinositol signaling system	map00564, map00561, map04070	18, 13, 16	1	000004F|arrow.g9365.t1
ec:2.7.1.158 - 2-kinase	Inositol phosphate metabolism, Phosphatidylinositol signaling system	map00562, map04070	16, 16	1	000003F|arrow.g5437.t1
ec:2.7.1.71 - kinase	Phenylalanine, tyrosine and tryptophan biosynthesis	map00400	19	1	000003F|arrow.g5619.t1
ec:4.1.99.12 - synthase	Riboflavin metabolism	map00740	10	1	000000F|arrow.g8292.t1
ec:3.2.1.46 - cerebroside galactosidase	Sphingolipid metabolism	map00600	10	1	000001F|arrow.g847.t1
ec:5.4.99.5 - mutase	Phenylalanine, tyrosine and tryptophan biosynthesis	map00400	19	1	000001F|arrow.g1578.t1
ec:1.17.1.9 - dehydrogenase	Glyoxylate and dicarboxylate metabolism, Methane metabolism	map00630, map00680	21, 16	1	000001F|arrow.g1033.t1
ec:2.4.1.25 - disproportionating enzyme	Starch and sucrose metabolism	map00500	24	1	000000F|arrow.g7089.t1
ec:2.7.1.30 - kinase	Glycerolipid metabolism	map00561	13	1	000001F|arrow.g1172.t1
ec:2.5.1.7 - 1-carboxyvinyltransferase	Amino sugar and nucleotide sugar metabolism, Peptidoglycan biosynthesis	map00520, map00550	32, 4	1	000002F|arrow.g1962.t1
ec:2.6.1.11 - transaminase	Arginine biosynthesis	map00220	16	1	000002F|arrow.g2868.t1
ec:2.7.1.24 - kinase	Pantothenate and CoA biosynthesis	map00770	13	1	000002F|arrow.g1736.t1
ec:3.11.1.2 - hydrolase	Phosphonate and phosphinate metabolism	map00440	1	1	000001F|arrow.g28.t1
ec:1.2.1.24 - dehydrogenase (NAD+)	Nicotinate and nicotinamide metabolism, Butanoate metabolism, Alanine, aspartate and glutamate metabolism	map00760, map00650, map00250	12, 19, 24	1	000006F|arrow.g4824.t1
ec:2.4.1.11 - synthase	Starch and sucrose metabolism	map00500	24	1	000002F|arrow.g1832.t1
ec:4.1.2.13 - aldolase	Pentose phosphate pathway, Glycolysis / Gluconeogenesis, Carbon fixation in photosynthetic organisms, Methane metabolism, Fructose and mannose metabolism	map00030, map00010, map00710, map00680, map00051	15, 25, 14, 16, 23	1	000002F|arrow.g2015.t1
ec:4.2.1.9 - dehydratase	Pantothenate and CoA biosynthesis, Valine, leucine and isoleucine biosynthesis	map00770, map00290	13, 8	1	000001F|arrow.g266.t1
ec:3.7.1.2 - beta-diketonase	Tyrosine metabolism, Styrene degradation	map00350, map00643	11, 3	1	000001F|arrow.g1279.t1
ec:1.1.5.3 - dehydrogenase	Glycerophospholipid metabolism	map00564	18	1	000004F|arrow.g9109.t1
ec:2.4.1.83 - beta-D-mannosyltransferase	N-Glycan biosynthesis	map00510	21	1	000001F|arrow.g957.t1
ec:1.14.18.9 - monooxygenase	Steroid biosynthesis	map00100	8	1	000000F|arrow.g7164.t1
ec:2.4.1.259 - alpha-1,2-mannosyltransferase	N-Glycan biosynthesis	map00510	21	1	000003F|arrow.g5610.t1
ec:1.3.1.6 - reductase (NADH)	Carbon fixation pathways in prokaryotes	map00720	21	1	000007F|arrow.g10377.t1
ec:6.1.1.7 - ligase	Aminoacyl-tRNA biosynthesis	map00970	22	1	000005F|arrow.g3673.t1
ec:2.5.1.15 - synthase	Folate biosynthesis	map00790	19	1	000000F|arrow.g7571.t1
ec:2.7.9.2 - water dikinase	Pyruvate metabolism, Carbon fixation pathways in prokaryotes, Glycolysis / Gluconeogenesis, Methane metabolism	map00620, map00720, map00010, map00680	28, 21, 25, 16	1	000001F|arrow.g317.t1
ec:3.1.3.2 - phosphatase	Thiamine metabolism, Riboflavin metabolism	map00730, map00740	11, 10	1	000001F|arrow.g134.t1
ec:2.4.2.19 - diphosphorylase (carboxylating)	Nicotinate and nicotinamide metabolism	map00760	12	1	000002F|arrow.g2193.t1
ec:4.1.3.4 - lyase	Synthesis and degradation of ketone bodies, Geraniol degradation, Butanoate metabolism, Valine, leucine and isoleucine degradation	map00072, map00281, map00650, map00280	4, 4, 19, 16	1	000002F|arrow.g2196.t1
ec:1.1.1.145 - dehydrogenase	Steroid degradation, Steroid hormone biosynthesis	map00984, map00140	2, 4	1	000002F|arrow.g1813.t1
ec:2.3.1.61 - succinyltransferase	Citrate cycle (TCA cycle), Tryptophan metabolism, Lysine degradation	map00020, map00380, map00310	17, 17, 11	1	000007F|arrow.g10092.t1
ec:2.7.7.23 - diphosphorylase	Amino sugar and nucleotide sugar metabolism, O-Antigen nucleotide sugar biosynthesis	map00520, map00541	32, 7	1	000002F|arrow.g2160.t1
ec:4.2.1.75 - synthase	Porphyrin and chlorophyll metabolism	map00860	15	1	000000F|arrow.g8259.t1
ec:4.1.99.22 - 3',8-cyclase	Folate biosynthesis	map00790	19	1	000006F|arrow.g4278.t1
ec:5.3.1.26 - isomerase	Galactose metabolism	map00052	17	1	000002F|arrow.g2561.t1
ec:1.14.11.8 - dioxygenase	Lysine degradation	map00310	11	1	000000F|arrow.g7905.t1
ec:2.1.2.11 - hydroxymethyltransferase	Pantothenate and CoA biosynthesis	map00770	13	1	000004F|arrow.g8947.t1
ec:5.3.1.23 - isomerase	Cysteine and methionine metabolism	map00270	27	1	000000F|arrow.g7759.t1
ec:2.3.1.51 - O-acyltransferase	Glycerophospholipid metabolism, Glycerolipid metabolism	map00564, map00561	18, 13	2	000003F|arrow.g5883.t1, 000000F|arrow.g6826.t1
ec:5.3.3.2 - Delta-isomerase	Terpenoid backbone biosynthesis	map00900	13	1	000006F|arrow.g4479.t1
ec:1.3.5.2 - dehydrogenase (quinone)	Pyrimidine metabolism	map00240	24	1	000002F|arrow.g2559.t1
ec:2.4.1.256 - alpha-1,2-glucosyltransferase	N-Glycan biosynthesis	map00510	21	1	000002F|arrow.g2566.t1
ec:2.4.2.10 - phosphoribosyltransferase	Pyrimidine metabolism, Drug metabolism - other enzymes	map00240, map00983	24, 16	1	000002F|arrow.g2596.t1
ec:6.4.1.3 - carboxylase	Carbon fixation pathways in prokaryotes, Glyoxylate and dicarboxylate metabolism, Propanoate metabolism, Valine, leucine and isoleucine degradation	map00720, map00630, map00640, map00280	21, 21, 16, 16	1	000005F|arrow.g4215.t1
ec:4.3.1.19 - ammonia-lyase	Valine, leucine and isoleucine biosynthesis, Glycine, serine and threonine metabolism	map00290, map00260	8, 27	1	000006F|arrow.g4826.t1
ec:2.7.4.2 - kinase	Terpenoid backbone biosynthesis	map00900	13	2	000003F|arrow.g6263.t1, 000008F|arrow.g10532.t1
ec:3.2.1.28 - trehalase	Starch and sucrose metabolism	map00500	24	1	000000F|arrow.g7937.t1
ec:1.14.13.8 - monooxygenase	Drug metabolism - cytochrome P450	map00982	5	1	000001F|arrow.g457.t1
ec:3.5.3.11 - agmatine ureohydrolase	Arginine and proline metabolism	map00330	14	1	000001F|arrow.g1573.t1
ec:7.1.1.2 - reductase (H+-translocating)	Oxidative phosphorylation	map00190	7	1	000002F|arrow.g1879.t1
ec:3.6.1.23 - diphosphatase	Pyrimidine metabolism, Drug metabolism - other enzymes	map00240, map00983	24, 16	1	000001F|arrow.g696.t1
ec:1.4.1.4 - dehydrogenase (NADP+)	Nitrogen metabolism, Alanine, aspartate and glutamate metabolism, Arginine biosynthesis	map00910, map00250, map00220	13, 24, 16	1	000006F|arrow.g5002.t1
ec:2.3.1.1 - N-acetyltransferase	Arginine biosynthesis	map00220	16	1	000002F|arrow.g2617.t1
ec:2.1.2.2 - formyltransferase	Purine metabolism, One carbon pool by folate	map00230, map00670	49, 12	1	000002F|arrow.g2542.t1
ec:4.1.1.15 - decarboxylase	beta-Alanine metabolism, Butanoate metabolism, Alanine, aspartate and glutamate metabolism, Taurine and hypotaurine metabolism	map00410, map00650, map00250, map00430	11, 19, 24, 5	1	000003F|arrow.g6407.t1
ec:3.2.1.21 - gentiobiase	Phenylpropanoid biosynthesis, Starch and sucrose metabolism, Cyanoamino acid metabolism	map00940, map00500, map00460	1, 24, 5	1	000001F|arrow.g870.t1
ec:2.5.1.39 - polyprenyltransferase	Ubiquinone and other terpenoid-quinone biosynthesis	map00130	6	2	000004F|arrow.g9084.t1, 000004F|arrow.g9083.t1
ec:4.2.1.70 - synthase	Pyrimidine metabolism	map00240	24	1	000001F|arrow.g465.t1
ec:1.13.12.16 - monooxygenase	Nitrogen metabolism	map00910	13	1	000001F|arrow.g603.t1
ec:1.2.1.59 - dehydrogenase (NAD(P)+) (phosphorylating)	Glycolysis / Gluconeogenesis, Carbon fixation in photosynthetic organisms	map00010, map00710	25, 14	1	000005F|arrow.g4116.t1
ec:2.3.3.8 - citrate synthase	Citrate cycle (TCA cycle), Carbon fixation pathways in prokaryotes	map00020, map00720	17, 21	1	000001F|arrow.g622.t1
ec:2.1.2.1 - hydroxymethyltransferase	Glyoxylate and dicarboxylate metabolism, Methane metabolism, Cyanoamino acid metabolism, One carbon pool by folate, Glycine, serine and threonine metabolism	map00630, map00680, map00460, map00670, map00260	21, 16, 5, 12, 27	1	000002F|arrow.g2481.t1
ec:3.5.1.2 - glutaminase I	D-Glutamine and D-glutamate metabolism, Alanine, aspartate and glutamate metabolism, Arginine biosynthesis	map00471, map00250, map00220	3, 24, 16	1	000005F|arrow.g3546.t1
ec:6.1.1.2 - ligase	Aminoacyl-tRNA biosynthesis	map00970	22	1	000001F|arrow.g990.t1
ec:2.7.1.150 - 5-kinase	Inositol phosphate metabolism, Phosphatidylinositol signaling system	map00562, map04070	16, 16	1	000004F|arrow.g9779.t1
ec:2.7.1.2 - glucokinase (phosphorylating)	Amino sugar and nucleotide sugar metabolism, Neomycin, kanamycin and gentamicin biosynthesis, Galactose metabolism, Glycolysis / Gluconeogenesis, Starch and sucrose metabolism, Streptomycin biosynthesis	map00520, map00524, map00052, map00010, map00500, map00521	32, 2, 17, 25, 24, 4	1	000005F|arrow.g3204.t1
ec:3.2.1.10 - limit dextrinase (erroneous)	Galactose metabolism, Starch and sucrose metabolism	map00052, map00500	17, 24	2	000002F|arrow.g3016.t1, 000005F|arrow.g3065.t1
ec:2.7.1.20 - kinase	Purine metabolism	map00230	49	1	000002F|arrow.g2032.t1
ec:2.1.1.17 - N-methyltransferase	Glycerophospholipid metabolism	map00564	18	1	000001F|arrow.g508.t1
ec:4.2.1.68 - dehydratase	Fructose and mannose metabolism	map00051	23	1	000002F|arrow.g1815.t1
ec:3.6.1.1 - diphosphatase	Oxidative phosphorylation	map00190	7	1	000002F|arrow.g2392.t1
ec:1.5.1.20 - reductase [NAD(P)H]	Carbon fixation pathways in prokaryotes, One carbon pool by folate	map00720, map00670	21, 12	1	000002F|arrow.g2597.t1
ec:3.2.1.78 - endo-1,4-beta-mannosidase	Fructose and mannose metabolism	map00051	23	1	000001F|arrow.g856.t1
ec:1.1.1.330 - 3-oxoacyl-CoA reductase	Fatty acid elongation, Biosynthesis of unsaturated fatty acids	map00062, map01040	7, 6	1	000002F|arrow.g2622.t1
ec:1.1.1.23 - dehydrogenase	Histidine metabolism	map00340	11	1	000001F|arrow.g257.t1
ec:1.4.4.2 - dehydrogenase (aminomethyl-transferring)	Glycine, serine and threonine metabolism	map00260	27	1	000001F|arrow.g292.t1
ec:2.3.1.39 - S-malonyltransferase	Fatty acid biosynthesis	map00061	10	1	000000F|arrow.g7745.t1
ec:4.2.3.5 - synthase	Phenylalanine, tyrosine and tryptophan biosynthesis	map00400	19	1	000000F|arrow.g7844.t1
ec:3.2.1.31 - beta-glucuronide glucuronohydrolase glucuronidase	Flavone and flavonol biosynthesis, Drug metabolism - other enzymes, Ascorbate and aldarate metabolism, Porphyrin and chlorophyll metabolism, Glycosaminoglycan degradation, Pentose and glucuronate interconversions	map00944, map00983, map00053, map00860, map00531, map00040	1, 16, 7, 15, 3, 16	1	000006F|arrow.g5177.t1
ec:3.1.3.1 - phosphatase	Thiamine metabolism, Folate biosynthesis	map00730, map00790	11, 19	1	000000F|arrow.g6932.t1
ec:2.7.4.14 - kinase	Pyrimidine metabolism, Drug metabolism - other enzymes	map00240, map00983	24, 16	1	000000F|arrow.g7717.t1
ec:5.1.3.15 - 1-epimerase	Glycolysis / Gluconeogenesis	map00010	25	1	000006F|arrow.g4726.t1
ec:1.1.1.35 - dehydrogenase	Toluene degradation, Fatty acid elongation, Carbon fixation pathways in prokaryotes, Fatty acid degradation, Geraniol degradation, Tryptophan metabolism, Lysine degradation, Butanoate metabolism, Caprolactam degradation, Benzoate degradation, Valine, leucine and isoleucine degradation	map00623, map00062, map00720, map00071, map00281, map00380, map00310, map00650, map00930, map00362, map00280	4, 7, 21, 10, 4, 17, 11, 19, 3, 7, 16	1	000001F|arrow.g319.t1
ec:3.4.19.9 - gamma-glutamyl hydrolase	Folate biosynthesis	map00790	19	33	000005F|arrow.g3533.t1, 000000F|arrow.g7636.t1, 000000F|arrow.g8251.t1, 000007F|arrow.g10101.t1, 000000F|arrow.g7273.t1, 000001F|arrow.g1283.t1, 000000F|arrow.g6711.t1, 000000F|arrow.g6843.t1, 000000F|arrow.g8106.t1, 000000F|arrow.g8238.t1, 000001F|arrow.g1390.t1, 000001F|arrow.g1530.t1, 000000F|arrow.g6709.t1, 000006F|arrow.g4900.t1, 000007F|arrow.g10338.t1, 000007F|arrow.g10110.t1, 000004F|arro…
ec:3.5.4.5 - deaminase	Pyrimidine metabolism, Drug metabolism - other enzymes	map00240, map00983	24, 16	1	000005F|arrow.g3323.t1
ec:1.1.1.103 - 3-dehydrogenase	Glycine, serine and threonine metabolism	map00260	27	1	000001F|arrow.g521.t1
ec:3.2.1.52 - hexosaminidase	Glycosphingolipid biosynthesis - ganglio series, Amino sugar and nucleotide sugar metabolism, Various types of N-glycan biosynthesis, Glycosaminoglycan degradation, Other glycan degradation, Glycosphingolipid biosynthesis - globo and isoglobo series	map00604, map00520, map00513, map00531, map00511, map00603	2, 32, 12, 3, 7, 2	1	000005F|arrow.g3510.t1
ec:2.4.1.131 - alpha-1,2-mannosyltransferase	N-Glycan biosynthesis, Various types of N-glycan biosynthesis	map00510, map00513	21, 12	1	000000F|arrow.g7850.t1
ec:6.3.2.1 - ligase (AMP-forming)	Pantothenate and CoA biosynthesis, beta-Alanine metabolism	map00770, map00410	13, 11	1	000003F|arrow.g6297.t1
ec:3.5.4.2 - deaminase	Purine metabolism	map00230	49	1	000000F|arrow.g6654.t1
ec:3.5.4.6 - deaminase	Purine metabolism	map00230	49	1	000006F|arrow.g5072.t1
ec:3.4.13.18 - nonspecific dipeptidase	beta-Alanine metabolism, Arginine and proline metabolism, Histidine metabolism	map00410, map00330, map00340	11, 14, 11	1	000006F|arrow.g4421.t1
ec:6.1.1.15 - ligase	Aminoacyl-tRNA biosynthesis	map00970	22	1	000001F|arrow.g505.t1
ec:1.1.1.9 - reductase	Pentose and glucuronate interconversions	map00040	16	1	000002F|arrow.g2130.t1
ec:4.1.2.4 - aldolase	Pentose phosphate pathway	map00030	15	1	000004F|arrow.g8580.t1
ec:3.2.1.39 - endo-1,3-beta-D-glucosidase	Starch and sucrose metabolism	map00500	24	1	000005F|arrow.g4014.t1
ec:2.3.1.12 - acetyltransferase	Citrate cycle (TCA cycle), Pyruvate metabolism, Glycolysis / Gluconeogenesis	map00020, map00620, map00010	17, 28, 25	1	000004F|arrow.g8641.t1
ec:1.3.1.94 - reductase	N-Glycan biosynthesis	map00510	21	1	000000F|arrow.g8010.t1
ec:2.7.1.105 - phosphofructokinase 2	Fructose and mannose metabolism	map00051	23	1	000001F|arrow.g1013.t1
ec:3.5.1.89 - deacetylase	Glycosylphosphatidylinositol (GPI)-anchor biosynthesis	map00563	2	1	000001F|arrow.g111.t1
ec:2.7.4.24 - kinase	Phosphatidylinositol signaling system	map04070	16	1	000000F|arrow.g7752.t1
ec:2.4.1.232 - alpha-1,6-mannosyltransferase	Various types of N-glycan biosynthesis	map00513	12	1	000001F|arrow.g1143.t1
ec:4.3.3.6 - 5'-phosphate synthase (glutamine hydrolysing)	Vitamin B6 metabolism	map00750	4	1	000005F|arrow.g4162.t1
ec:4.2.1.36 - hydratase	Lysine biosynthesis	map00300	5	1	000001F|arrow.g1025.t1
ec:2.7.7.41 - cytidylyltransferase	Glycerophospholipid metabolism, Phosphatidylinositol signaling system	map00564, map04070	18, 16	1	000001F|arrow.g816.t1
ec:3.2.1.24 - alpha-D-mannosidase	Other glycan degradation	map00511	7	1	000002F|arrow.g1666.t1
ec:6.3.5.4 - synthase (glutamine-hydrolysing)	Alanine, aspartate and glutamate metabolism	map00250	24	1	000006F|arrow.g4810.t1
ec:2.7.2.1 - kinase	Pyruvate metabolism, Carbon fixation pathways in prokaryotes, Propanoate metabolism, Methane metabolism, Taurine and hypotaurine metabolism	map00620, map00720, map00640, map00680, map00430	28, 21, 16, 16, 5	1	000000F|arrow.g7392.t1
ec:1.2.1.38 - reductase	Arginine biosynthesis	map00220	16	1	000005F|arrow.g3271.t1
ec:2.5.1.10 - diphosphate synthase	Terpenoid backbone biosynthesis	map00900	13	1	000002F|arrow.g1827.t1
ec:5.3.1.16 - isomerase	Histidine metabolism	map00340	11	1	000002F|arrow.g2052.t1
ec:2.5.1.3 - phosphate synthase	Thiamine metabolism	map00730	11	1	000000F|arrow.g6635.t1
ec:1.1.1.81 - reductase	Glyoxylate and dicarboxylate metabolism, Glycine, serine and threonine metabolism	map00630, map00260	21, 27	1	000005F|arrow.g3458.t1
ec:1.8.1.4 - dehydrogenase	Citrate cycle (TCA cycle), Pyruvate metabolism, Glycolysis / Gluconeogenesis, Propanoate metabolism, Tryptophan metabolism, Lysine degradation, Valine, leucine and isoleucine degradation, Glycine, serine and threonine metabolism	map00020, map00620, map00010, map00640, map00380, map00310, map00280, map00260	17, 28, 25, 16, 17, 11, 16, 27	1	000001F|arrow.g1053.t1
ec:2.6.1.16 - transaminase (isomerizing)	Amino sugar and nucleotide sugar metabolism, Alanine, aspartate and glutamate metabolism	map00520, map00250	32, 24	1	000000F|arrow.g7763.t1
ec:2.1.1.107 - C-methyltransferase	Porphyrin and chlorophyll metabolism	map00860	15	1	000007F|arrow.g10327.t1
ec:2.3.1.181 - transferase	Lipoic acid metabolism	map00785	2	1	000007F|arrow.g10334.t1
ec:4.4.1.13 - beta-lyase	Cysteine and methionine metabolism, Selenocompound metabolism	map00270, map00450	27, 6	1	000005F|arrow.g3713.t1
ec:2.1.1.45 - synthase	Pyrimidine metabolism, One carbon pool by folate	map00240, map00670	24, 12	1	000007F|arrow.g9973.t1
ec:1.1.1.49 - dehydrogenase (NADP+)	Pentose phosphate pathway, Glutathione metabolism	map00030, map00480	15, 12	1	000002F|arrow.g2401.t1
ec:3.5.99.6 - deaminase	Amino sugar and nucleotide sugar metabolism	map00520	32	1	000005F|arrow.g3684.t1
ec:5.1.3.1 - 3-epimerase	Pentose phosphate pathway, Carbon fixation in photosynthetic organisms, Pentose and glucuronate interconversions	map00030, map00710, map00040	15, 14, 16	1	000003F|arrow.g6498.t1
ec:3.2.1.113 - 1,2-alpha-mannosidase	N-Glycan biosynthesis, Various types of N-glycan biosynthesis	map00510, map00513	21, 12	1	000002F|arrow.g2148.t1
ec:2.7.1.39 - kinase	Glycine, serine and threonine metabolism	map00260	27	1	000002F|arrow.g2091.t1
ec:3.3.2.6 - hydrolase	Arachidonic acid metabolism	map00590	4	1	000004F|arrow.g9259.t1
ec:2.7.1.108 - kinase	N-Glycan biosynthesis	map00510	21	1	000006F|arrow.g4744.t1
ec:6.1.1.12 - ligase	Aminoacyl-tRNA biosynthesis	map00970	22	1	000003F|arrow.g5918.t1
ec:1.3.1.76 - dehydrogenase	Porphyrin and chlorophyll metabolism	map00860	15	1	000004F|arrow.g8643.t1
ec:4.3.2.3 - lyase	Purine metabolism	map00230	49	1	000005F|arrow.g3776.t1
ec:4.2.1.1 - anhydrase	Nitrogen metabolism	map00910	13	1	000001F|arrow.g1479.t1
ec:5.3.3.8 - isomerase	Fatty acid degradation	map00071	10	1	000001F|arrow.g690.t1
ec:6.3.4.15 - carboxyl-carrier protein] ligase	Biotin metabolism	map00780	6	1	000000F|arrow.g7603.t1
ec:4.1.1.21 - carboxylase	Purine metabolism	map00230	49	1	000000F|arrow.g8076.t1
ec:2.8.3.5 - CoA-transferase	Synthesis and degradation of ketone bodies, Butanoate metabolism, Valine, leucine and isoleucine degradation	map00072, map00650, map00280	4, 19, 16	1	000003F|arrow.g6029.t1
ec:1.4.3.21 - oxidase	Tyrosine metabolism, Phenylalanine metabolism, beta-Alanine metabolism, Isoquinoline alkaloid biosynthesis, Tropane, piperidine and pyridine alkaloid biosynthesis, Glycine, serine and threonine metabolism	map00350, map00360, map00410, map00950, map00960, map00260	11, 8, 11, 4, 3, 27	1	000001F|arrow.g1089.t1
ec:1.5.1.3 - reductase	Folate biosynthesis, One carbon pool by folate	map00790, map00670	19, 12	1	000000F|arrow.g6794.t1
ec:2.7.1.29 - kinase	Glycerolipid metabolism, Methane metabolism	map00561, map00680	13, 16	1	000001F|arrow.g98.t1
ec:1.13.11.52 - 2,3-dioxygenase	Tryptophan metabolism	map00380	17	1	000003F|arrow.g5429.t1
ec:6.1.1.22 - ligase	Aminoacyl-tRNA biosynthesis	map00970	22	2	000002F|arrow.g2500.t1, 000004F|arrow.g9017.t1
ec:3.2.1.22 - melibiase	Sphingolipid metabolism, Galactose metabolism, Glycerolipid metabolism, Glycosphingolipid biosynthesis - globo and isoglobo series	map00600, map00052, map00561, map00603	10, 17, 13, 2	1	000001F|arrow.g264.t1
ec:1.2.4.2 - dehydrogenase (succinyl-transferring)	Citrate cycle (TCA cycle), Tryptophan metabolism, Lysine degradation	map00020, map00380, map00310	17, 17, 11	3	000001F|arrow.g1053.t1, 000000F|arrow.g6985.t1, 000004F|arrow.g9590.t1
ec:4.2.1.51 - dehydratase	Phenylalanine, tyrosine and tryptophan biosynthesis	map00400	19	1	000002F|arrow.g2103.t1
ec:2.7.1.26 - kinase	Riboflavin metabolism	map00740	10	1	000004F|arrow.g9032.t1
ec:2.2.1.6 - synthase	Pantothenate and CoA biosynthesis, C5-Branched dibasic acid metabolism, Valine, leucine and isoleucine biosynthesis, Butanoate metabolism	map00770, map00660, map00290, map00650	13, 4, 8, 19	1	000005F|arrow.g4190.t1
ec:1.8.1.7 - reductase	Glutathione metabolism	map00480	12	1	000006F|arrow.g4618.t1
ec:1.13.11.1 - 1,2-dioxygenase	Chlorocyclohexane and chlorobenzene degradation, Toluene degradation, Fluorobenzoate degradation, Benzoate degradation	map00361, map00623, map00364, map00362	2, 4, 2, 7	1	000002F|arrow.g2355.t1
ec:4.3.2.7 - gamma-glutamylcyclotransferase	Glutathione metabolism	map00480	12	1	000002F|arrow.g2408.t1
ec:2.7.2.4 - kinase	Cysteine and methionine metabolism, Monobactam biosynthesis, Lysine biosynthesis, Glycine, serine and threonine metabolism	map00270, map00261, map00300, map00260	27, 2, 5, 27	1	000002F|arrow.g2111.t1
ec:1.1.1.2 - dehydrogenase (NADP+)	Ascorbate and aldarate metabolism, Glycerolipid metabolism, Pyruvate metabolism, Glycolysis / Gluconeogenesis, Caprolactam degradation, Pentose and glucuronate interconversions	map00053, map00561, map00620, map00010, map00930, map00040	7, 13, 28, 25, 3, 16	1	000003F|arrow.g5230.t1
ec:2.3.1.35 - N-acetyltransferase	Arginine biosynthesis	map00220	16	1	000005F|arrow.g4159.t1
ec:1.1.1.101 - reductase	Glycerophospholipid metabolism, Ether lipid metabolism	map00564, map00565	18, 4	1	000001F|arrow.g954.t1
ec:5.4.2.3 - mutase	Amino sugar and nucleotide sugar metabolism	map00520	32	1	000000F|arrow.g7910.t1
ec:3.4.19.13 - gamma-glutamate hydrolase	Glutathione metabolism	map00480	12	1	000000F|arrow.g7636.t1
ec:3.5.99.2 - aminohydrolase	Thiamine metabolism	map00730	11	1	000002F|arrow.g2531.t1
ec:4.6.1.1 - cyclase	Purine metabolism	map00230	49	1	000001F|arrow.g1169.t1
ec:3.1.1.31 - phosphogluconolactonase	Pentose phosphate pathway	map00030	15	1	000001F|arrow.g64.t1
ec:4.1.1.32 - carboxykinase (GTP)	Citrate cycle (TCA cycle), Pyruvate metabolism, Glycolysis / Gluconeogenesis	map00020, map00620, map00010	17, 28, 25	1	000001F|arrow.g1256.t1
ec:3.1.4.2 - phosphodiesterase	Glycerophospholipid metabolism	map00564	18	1	000001F|arrow.g211.t1
ec:5.1.3.2 - 4-epimerase	Amino sugar and nucleotide sugar metabolism, O-Antigen nucleotide sugar biosynthesis, Galactose metabolism	map00520, map00541, map00052	32, 7, 17	4	000002F|arrow.g2337.t1, 000003F|arrow.g6255.t1, 000004F|arrow.g9330.t1, 000004F|arrow.g9830.t1
ec:1.1.1.26 - reductase	Glyoxylate and dicarboxylate metabolism	map00630	21	1	000004F|arrow.g9555.t1
ec:3.2.1.132 - ec:3.2.1.132 chitosanase	Amino sugar and nucleotide sugar metabolism	map00520	32	1	000002F|arrow.g2347.t1
ec:2.1.1.71 - N-methyltransferase	Glycerophospholipid metabolism	map00564	18	1	000004F|arrow.g9155.t1
ec:2.4.1.257 - alpha-1,6-mannosyltransferase	N-Glycan biosynthesis, Various types of N-glycan biosynthesis	map00510, map00513	21, 12	1	000001F|arrow.g1571.t1
ec:1.6.1.1 - transhydrogenase (Si-specific)	Nicotinate and nicotinamide metabolism	map00760	12	1	000002F|arrow.g1878.t1
ec:6.3.4.2 - synthase (glutamine hydrolysing)	Pyrimidine metabolism	map00240	24	1	000007F|arrow.g10174.t1
ec:2.1.1.41 - 24-C-methyltransferase	Steroid biosynthesis	map00100	8	1	000001F|arrow.g274.t1
ec:2.10.1.1 - molybdotransferase	Folate biosynthesis	map00790	19	1	000001F|arrow.g571.t1
ec:1.14.14.1 - monooxygenase	Caffeine metabolism, Retinol metabolism, Linoleic acid metabolism, Aminobenzoate degradation, Arachidonic acid metabolism, Drug metabolism - cytochrome P450, Metabolism of xenobiotics by cytochrome P450, Fatty acid degradation, Tryptophan metabolism, Steroid hormone biosynthesis	map00232, map00830, map00591, map00627, map00590, map00982, map00980, map00071, map00380, map00140	4, 2, 2, 6, 4, 5, 6, 10, 17, 4	1	000002F|arrow.g2473.t1
ec:2.7.7.1 - adenylyltransferase	Nicotinate and nicotinamide metabolism	map00760	12	2	000004F|arrow.g8913.t1, 000006F|arrow.g4925.t1
ec:2.4.1.18 - branching enzyme	Starch and sucrose metabolism	map00500	24	1	000003F|arrow.g6229.t1
ec:3.2.1.23 - lactase (ambiguous)	Glycosphingolipid biosynthesis - ganglio series, Sphingolipid metabolism, Galactose metabolism, Glycosaminoglycan degradation, Other glycan degradation	map00604, map00600, map00052, map00531, map00511	2, 10, 17, 3, 7	1	000006F|arrow.g4563.t1
ec:5.3.1.8 - isomerase	Amino sugar and nucleotide sugar metabolism, O-Antigen nucleotide sugar biosynthesis, Fructose and mannose metabolism	map00520, map00541, map00051	32, 7, 23	1	000006F|arrow.g4793.t1
ec:2.1.1.14 - S-methyltransferase	Cysteine and methionine metabolism, Selenocompound metabolism	map00270, map00450	27, 6	1	000005F|arrow.g3183.t1
ec:2.7.4.21 - kinase	Phosphatidylinositol signaling system	map04070	16	1	000000F|arrow.g7752.t1
ec:1.2.4.4 - dehydrogenase (2-methylpropanoyl-transferring)	Propanoate metabolism, Valine, leucine and isoleucine degradation	map00640, map00280	16, 16	1	000004F|arrow.g8904.t1
ec:6.1.1.14 - ligase	Aminoacyl-tRNA biosynthesis	map00970	22	1	000002F|arrow.g2082.t1
ec:2.5.1.78 - synthase	Riboflavin metabolism	map00740	10	2	000000F|arrow.g7763.t1, 000000F|arrow.g7764.t1
ec:3.1.4.3 - C	Glycerophospholipid metabolism, Inositol phosphate metabolism, Ether lipid metabolism	map00564, map00562, map00565	18, 16, 4	1	000002F|arrow.g2334.t1
ec:2.8.3.8 - CoA-transferase	Aminobenzoate degradation, Propanoate metabolism, Butanoate metabolism	map00627, map00640, map00650	6, 16, 19	1	000003F|arrow.g6373.t1
ec:1.1.1.67 - 2-dehydrogenase	Fructose and mannose metabolism	map00051	23	1	000002F|arrow.g2861.t1
ec:2.4.2.1 - phosphorylase	Pyrimidine metabolism, Nicotinate and nicotinamide metabolism, Purine metabolism	map00240, map00760, map00230	24, 12, 49	1	000001F|arrow.g992.t1
ec:6.3.2.12 - synthase	Folate biosynthesis	map00790	19	1	000006F|arrow.g4993.t1
ec:2.3.1.20 - O-acyltransferase	Glycerolipid metabolism, Cutin, suberine and wax biosynthesis	map00561, map00073	13, 1	3	000002F|arrow.g1604.t1, 000000F|arrow.g6848.t1, 000003F|arrow.g6002.t1
ec:3.1.4.11 - phospholipase C	Inositol phosphate metabolism, Phosphatidylinositol signaling system	map00562, map04070	16, 16	1	000002F|arrow.g2334.t1
ec:6.3.2.2 - ligase	Cysteine and methionine metabolism, Glutathione metabolism	map00270, map00480	27, 12	1	000004F|arrow.g9408.t1
ec:1.1.1.42 - dehydrogenase (NADP+)	Citrate cycle (TCA cycle), Carbon fixation pathways in prokaryotes, Glutathione metabolism	map00020, map00720, map00480	17, 21, 12	1	000002F|arrow.g2418.t1
ec:1.14.15.7 - monooxygenase	Glycine, serine and threonine metabolism	map00260	27	1	000002F|arrow.g2692.t1
ec:3.1.4.12 - phosphodiesterase	Sphingolipid metabolism	map00600	10	1	000005F|arrow.g3416.t1
ec:6.3.4.4 - synthase	Alanine, aspartate and glutamate metabolism, Purine metabolism	map00250, map00230	24, 49	1	000006F|arrow.g4668.t1
ec:2.3.1.4 - N-acetyltransferase	Amino sugar and nucleotide sugar metabolism	map00520	32	1	000005F|arrow.g3221.t1
ec:1.17.1.4 - dehydrogenase	Purine metabolism	map00230	49	1	000004F|arrow.g9491.t1
ec:2.4.1.109 - mannosyltransferase	Other types of O-glycan biosynthesis, Mannose type O-glycan biosynthesis	map00514, map00515	1, 1	1	000005F|arrow.g3751.t1
ec:1.5.3.7 - oxidase	Lysine degradation	map00310	11	1	000003F|arrow.g6163.t1
ec:4.2.1.17 - hydratase	Limonene and pinene degradation, Fatty acid elongation, Phenylalanine metabolism, Carbon fixation pathways in prokaryotes, Fatty acid degradation, Geraniol degradation, Propanoate metabolism, Tryptophan metabolism, alpha-Linolenic acid metabolism, Butanoate metabolism, Caprolactam degradation, Aminobenzoate degradation, beta-Alanine metabolism, Lysine degradation, Benzoate degradation, Valine, le…	map00903, map00062, map00360, map00720, map00071, map00281, map00640, map00380, map00592, map00650, map00930, map00627, map00410, map00310, map00362, map00280	2, 7, 8, 21, 10, 4, 16, 17, 4, 19, 3, 6, 11, 11, 7, 16	1	000001F|arrow.g319.t1
ec:4.4.1.5 - lyase	Pyruvate metabolism	map00620	28	1	000001F|arrow.g1229.t1
ec:5.3.1.1 - isomerase	Glycolysis / Gluconeogenesis, Inositol phosphate metabolism, Carbon fixation in photosynthetic organisms, Fructose and mannose metabolism	map00010, map00562, map00710, map00051	25, 16, 14, 23	1	000001F|arrow.g1547.t1
ec:3.5.1.9 - kynurenine formamidase	Glyoxylate and dicarboxylate metabolism, Tryptophan metabolism	map00630, map00380	21, 17	9	000001F|arrow.g901.t1, 000001F|arrow.g1424.t1, 000002F|arrow.g1883.t1, 000003F|arrow.g5236.t1, 000005F|arrow.g3865.t1, 000002F|arrow.g1914.t1, 000001F|arrow.g1465.t1, 000003F|arrow.g5753.t1, 000003F|arrow.g5781.t1
ec:3.2.1.26 - invertase	Galactose metabolism, Starch and sucrose metabolism	map00052, map00500	17, 24	3	000002F|arrow.g3016.t1, 000002F|arrow.g2283.t1, 000005F|arrow.g3065.t1
ec:6.3.2.6 - synthase	Purine metabolism	map00230	49	1	000007F|arrow.g10270.t1
ec:3.1.6.1 - sulfatase	Sphingolipid metabolism, Steroid hormone biosynthesis	map00600, map00140	10, 4	1	000001F|arrow.g612.t1
ec:4.2.1.11 - hydratase	Glycolysis / Gluconeogenesis, Methane metabolism	map00010, map00680	25, 16	1	000000F|arrow.g7821.t1
ec:3.5.4.9 - cyclohydrolase	Carbon fixation pathways in prokaryotes, One carbon pool by folate	map00720, map00670	21, 12	1	000002F|arrow.g2417.t1
ec:1.3.1.32 - reductase	Chlorocyclohexane and chlorobenzene degradation, Toluene degradation, Fluorobenzoate degradation, Benzoate degradation	map00361, map00623, map00364, map00362	2, 4, 2, 7	2	000004F|arrow.g9739.t1, 000004F|arrow.g9740.t1
ec:6.3.4.21 - phosphoribosyltransferase	Nicotinate and nicotinamide metabolism	map00760	12	1	000002F|arrow.g2193.t1
ec:2.1.3.3 - carbamoyltransferase	Arginine biosynthesis	map00220	16	1	000006F|arrow.g4937.t1
ec:6.3.4.3 - ligase	Carbon fixation pathways in prokaryotes, One carbon pool by folate	map00720, map00670	21, 12	1	000002F|arrow.g2417.t1
ec:2.7.1.6 - galactokinase (phosphorylating)	Amino sugar and nucleotide sugar metabolism, Galactose metabolism	map00520, map00052	32, 17	1	000000F|arrow.g7437.t1
ec:3.5.2.5 - ec:3.5.2.5 allantoinase	Purine metabolism	map00230	49	1	000001F|arrow.g1036.t1
ec:2.4.1.34 - synthase	Starch and sucrose metabolism	map00500	24	1	000000F|arrow.g8214.t1
ec:2.5.1.18 - transferase	Drug metabolism - other enzymes, Drug metabolism - cytochrome P450, Metabolism of xenobiotics by cytochrome P450, Glutathione metabolism	map00983, map00982, map00980, map00480	16, 5, 6, 12	1	000001F|arrow.g818.t1
ec:6.3.3.1 - cyclo-ligase	Purine metabolism	map00230	49	1	000003F|arrow.g5870.t1
ec:1.2.1.8 - dehydrogenase	Glycine, serine and threonine metabolism	map00260	27	1	000005F|arrow.g3685.t1
ec:4.2.1.19 - dehydratase	Histidine metabolism	map00340	11	1	000003F|arrow.g5866.t1
ec:2.1.1.100 - O-methyltransferase	Terpenoid backbone biosynthesis	map00900	13	1	000000F|arrow.g6845.t1
ec:3.2.1.165 - CsxA	Amino sugar and nucleotide sugar metabolism	map00520	32	1	000005F|arrow.g3096.t1
ec:2.7.11.1 - serine/threonine protein kinase	Human immunodeficiency virus 1 infection, Human cytomegalovirus infection, Relaxin signaling pathway, mTOR signaling pathway, Human papillomavirus infection, PI3K-Akt signaling pathway, Thermogenesis	map05170, map05163, map04926, map04150, map05165, map04151, map04714	2, 2, 1, 4, 2, 2, 1	1	000001F|arrow.g100.t1
ec:3.3.2.10 - epoxide hydrolase	Arachidonic acid metabolism, Chloroalkane and chloroalkene degradation	map00590, map00625	4, 3	1	000003F|arrow.g5975.t1
ec:3.5.4.25 - cyclohydrolase II	Folate biosynthesis, Riboflavin metabolism	map00790, map00740	19, 10	1	000005F|arrow.g3150.t1
ec:2.5.1.21 - synthase	Sesquiterpenoid and triterpenoid biosynthesis, Steroid biosynthesis	map00909, map00100	2, 8	1	000004F|arrow.g8826.t1
ec:2.1.1.37 - (cytosine-5-)-methyltransferase	Cysteine and methionine metabolism	map00270	27	1	000005F|arrow.g3353.t1
ec:3.6.1.43 - dolichol diphosphatase	N-Glycan biosynthesis	map00510	21	1	000005F|arrow.g3404.t1
ec:2.7.7.4 - adenylyltransferase	Monobactam biosynthesis, Selenocompound metabolism, Sulfur metabolism, Purine metabolism	map00261, map00450, map00920, map00230	2, 6, 8, 49	1	000007F|arrow.g10318.t1
ec:3.1.3.11 - hexose diphosphatase	Pentose phosphate pathway, Glycolysis / Gluconeogenesis, Carbon fixation in photosynthetic organisms, Methane metabolism, Fructose and mannose metabolism	map00030, map00010, map00710, map00680, map00051	15, 25, 14, 16, 23	1	000004F|arrow.g9623.t1
ec:1.3.5.1 - dehydrogenase	Citrate cycle (TCA cycle), Carbon fixation pathways in prokaryotes, Oxidative phosphorylation, Butanoate metabolism	map00020, map00720, map00190, map00650	17, 21, 7, 19	1	000002F|arrow.g2320.t1
ec:2.8.1.1 - sulfurtransferase	Sulfur metabolism	map00920	8	1	000003F|arrow.g6224.t1
ec:4.2.1.55 - dehydratase	Glyoxylate and dicarboxylate metabolism, Butanoate metabolism	map00630, map00650	21, 19	1	000000F|arrow.g7060.t1
ec:3.1.3.25 - phosphatase	Inositol phosphate metabolism, Phosphatidylinositol signaling system, Streptomycin biosynthesis	map00562, map04070, map00521	16, 16, 4	1	000005F|arrow.g4031.t1
ec:3.3.2.9 - epoxide hydrolase	Metabolism of xenobiotics by cytochrome P450	map00980	6	1	000002F|arrow.g1601.t1
ec:1.14.13.1 - 1-monooxygenase	Naphthalene degradation, Dioxin degradation, Polycyclic aromatic hydrocarbon degradation	map00626, map00621, map00624	2, 1, 1	1	000001F|arrow.g1322.t1
ec:5.5.1.4 - synthase	Inositol phosphate metabolism, Streptomycin biosynthesis	map00562, map00521	16, 4	1	000005F|arrow.g3489.t1
ec:2.7.11.13 - kinase C	Phosphatidylinositol signaling system	map04070	16	1	000001F|arrow.g180.t1
ec:2.7.1.31 - 3-kinase	Glycerolipid metabolism, Glyoxylate and dicarboxylate metabolism, Glycine, serine and threonine metabolism	map00561, map00630, map00260	13, 21, 27	1	000000F|arrow.g7056.t1
ec:2.7.1.17 - xylulokinase (phosphorylating)	Pentose and glucuronate interconversions	map00040	16	1	000004F|arrow.g8758.t1
ec:2.6.1.1 - transaminase	Tyrosine metabolism, Cysteine and methionine metabolism, Phenylalanine metabolism, Phenylalanine, tyrosine and tryptophan biosynthesis, Arginine and proline metabolism, Isoquinoline alkaloid biosynthesis, Tropane, piperidine and pyridine alkaloid biosynthesis, Carbon fixation in photosynthetic organisms, Alanine, aspartate and glutamate metabolism, Novobiocin biosynthesis, Arginine biosynthesis	map00350, map00270, map00360, map00400, map00330, map00950, map00960, map00710, map00250, map00401, map00220	11, 27, 8, 19, 14, 4, 3, 14, 24, 3, 16	1	000005F|arrow.g3224.t1
ec:3.1.3.56 - 5-phosphatase	Inositol phosphate metabolism, Phosphatidylinositol signaling system	map00562, map04070	16, 16	1	000003F|arrow.g6000.t1
ec:2.4.1.1 - phosphorylase	Starch and sucrose metabolism	map00500	24	1	000003F|arrow.g5707.t1
ec:6.3.2.17 - synthase	Folate biosynthesis	map00790	19	1	000002F|arrow.g2710.t1
ec:6.1.1.4 - ligase	Aminoacyl-tRNA biosynthesis	map00970	22	1	000001F|arrow.g1034.t1
ec:2.6.1.19 - transaminase	beta-Alanine metabolism, Propanoate metabolism, Butanoate metabolism, Alanine, aspartate and glutamate metabolism	map00410, map00640, map00650, map00250	11, 16, 19, 24	1	000002F|arrow.g1997.t1
ec:1.1.1.94 - dehydrogenase [NAD(P)+]	Glycerophospholipid metabolism	map00564	18	1	000001F|arrow.g335.t1
ec:2.7.6.2 - diphosphokinase	Thiamine metabolism	map00730	11	1	000004F|arrow.g8696.t1
ec:6.3.5.1 - synthase (glutamine-hydrolysing)	Nicotinate and nicotinamide metabolism	map00760	12	1	000005F|arrow.g3546.t1
ec:3.5.1.1 - asparaginase II	Alanine, aspartate and glutamate metabolism, Cyanoamino acid metabolism	map00250, map00460	24, 5	1	000001F|arrow.g43.t1
ec:2.4.1.198 - N-acetylglucosaminyltransferase	Glycosylphosphatidylinositol (GPI)-anchor biosynthesis	map00563	2	1	000002F|arrow.g2255.t1
ec:1.13.11.53 - dioxygenase (Ni2+-requiring)	Cysteine and methionine metabolism	map00270	27	1	000003F|arrow.g5831.t1
ec:2.4.1.142 - beta-mannosyltransferase	N-Glycan biosynthesis, Various types of N-glycan biosynthesis	map00510, map00513	21, 12	1	000003F|arrow.g5275.t1
ec:6.3.5.5 - synthase (glutamine-hydrolysing)	Pyrimidine metabolism, Alanine, aspartate and glutamate metabolism	map00240, map00250	24, 24	1	000002F|arrow.g1987.t1
ec:1.8.3.4 - oxidase	Sulfur metabolism	map00920	8	1	000004F|arrow.g9097.t1
ec:4.1.1.49 - carboxykinase (ATP)	Citrate cycle (TCA cycle), Pyruvate metabolism, Glycolysis / Gluconeogenesis, Carbon fixation in photosynthetic organisms	map00020, map00620, map00010, map00710	17, 28, 25, 14	1	000001F|arrow.g1256.t1
ec:2.7.6.3 - diphosphokinase	Folate biosynthesis	map00790	19	1	000000F|arrow.g7571.t1
ec:1.7.1.2 - reductase [NAD(P)H]	Nitrogen metabolism	map00910	13	1	000003F|arrow.g5717.t1
ec:2.7.1.12 - gluconokinase (phosphorylating)	Pentose phosphate pathway	map00030	15	1	000003F|arrow.g5846.t1
ec:3.5.4.1 - deaminase	Pyrimidine metabolism	map00240	24	1	000001F|arrow.g744.t1
ec:2.7.1.11 - phosphohexokinase	Pentose phosphate pathway, Galactose metabolism, Glycolysis / Gluconeogenesis, Methane metabolism, Fructose and mannose metabolism	map00030, map00052, map00010, map00680, map00051	15, 17, 25, 16, 23	1	000005F|arrow.g3101.t1
ec:2.7.1.137 - 3-kinase	Inositol phosphate metabolism, Phosphatidylinositol signaling system	map00562, map04070	16, 16	1	000001F|arrow.g1158.t1
ec:3.2.1.37 - 1,4-beta-xylosidase	Amino sugar and nucleotide sugar metabolism	map00520	32	1	000002F|arrow.g1670.t1
ec:2.7.1.15 - deoxyribokinase	Pentose phosphate pathway	map00030	15	1	000002F|arrow.g1837.t1
ec:1.14.18.1 - monophenol monooxygenase	Tyrosine metabolism, Betalain biosynthesis, Isoquinoline alkaloid biosynthesis	map00350, map00965, map00950	11, 2, 4	1	000002F|arrow.g2860.t1
ec:3.5.4.16 - cyclohydrolase I	Folate biosynthesis	map00790	19	1	000005F|arrow.g3523.t1
ec:2.3.3.1 - (Si)-synthase	Citrate cycle (TCA cycle), Glyoxylate and dicarboxylate metabolism	map00020, map00630	17, 21	1	000005F|arrow.g3641.t1
ec:1.1.1.3 - dehydrogenase	Cysteine and methionine metabolism, Lysine biosynthesis, Glycine, serine and threonine metabolism	map00270, map00300, map00260	27, 5, 27	1	000000F|arrow.g7288.t1
ec:2.1.2.10 - S-aminomethyldihydrolipoylprotein:(6S)-tetrahydrofolate aminomethyltransferase (ammonia-forming)	One carbon pool by folate, Glycine, serine and threonine metabolism	map00670, map00260	12, 27	1	000005F|arrow.g3947.t1
ec:3.1.4.17 - phosphodiesterase	Purine metabolism	map00230	49	1	000001F|arrow.g738.t1
ec:3.5.1.23 - acylsphingosine deacylase	Sphingolipid metabolism	map00600	10	1	000000F|arrow.g7897.t1
ec:2.7.1.33 - kinase	Pantothenate and CoA biosynthesis	map00770	13	1	000002F|arrow.g2256.t1
ec:6.1.1.18 - ligase	Aminoacyl-tRNA biosynthesis	map00970	22	1	000007F|arrow.g10472.t1
ec:3.5.4.26 - deaminase	Riboflavin metabolism	map00740	10	1	000002F|arrow.g2764.t1
ec:2.8.1.9 - cofactor sulfurtransferase	Folate biosynthesis	map00790	19	1	000006F|arrow.g4751.t1
ec:2.8.1.6 - synthase	Biotin metabolism	map00780	6	1	000005F|arrow.g3338.t1
ec:3.5.2.17 - hydrolase	Purine metabolism	map00230	49	1	000000F|arrow.g7318.t1
ec:2.4.1.80 - glucosyltransferase	Sphingolipid metabolism	map00600	10	1	000004F|arrow.g8779.t1
ec:2.3.1.37 - synthase	Porphyrin and chlorophyll metabolism, Glycine, serine and threonine metabolism	map00860, map00260	15, 27	1	000002F|arrow.g2044.t1
ec:4.4.1.1 - gamma-lyase	Cysteine and methionine metabolism, Selenocompound metabolism, Glycine, serine and threonine metabolism	map00270, map00450, map00260	27, 6, 27	1	000001F|arrow.g346.t1
ec:1.1.1.17 - 5-dehydrogenase	Fructose and mannose metabolism	map00051	23	1	000002F|arrow.g2524.t1
ec:3.1.4.4 - D	Glycerophospholipid metabolism, Ether lipid metabolism	map00564, map00565	18, 4	4	000007F|arrow.g10117.t1, 000001F|arrow.g440.t1, 000004F|arrow.g8645.t1, 000004F|arrow.g9346.t1
ec:1.17.4.1 - reductase	Pyrimidine metabolism, Drug metabolism - other enzymes, Purine metabolism, Glutathione metabolism	map00240, map00983, map00230, map00480	24, 16, 49, 12	1	000001F|arrow.g143.t1
ec:2.5.1.61 - synthase	Porphyrin and chlorophyll metabolism	map00860	15	1	000001F|arrow.g194.t1
ec:3.2.1.20 - maltase	Galactose metabolism, Starch and sucrose metabolism	map00052, map00500	17, 24	1	000002F|arrow.g2283.t1
ec:6.3.1.2 - synthetase	Glyoxylate and dicarboxylate metabolism, Nitrogen metabolism, Alanine, aspartate and glutamate metabolism, Arginine biosynthesis	map00630, map00910, map00250, map00220	21, 13, 24, 16	1	000001F|arrow.g281.t1
ec:2.7.8.15 - N-acetylglucosaminephosphotransferase	N-Glycan biosynthesis	map00510	21	1	000002F|arrow.g2592.t1
ec:3.1.3.8 - 1-phytase	Inositol phosphate metabolism	map00562	16	1	000001F|arrow.g517.t1
ec:4.1.1.105 - decarboxylase	Indole alkaloid biosynthesis, Tryptophan metabolism	map00901, map00380	2, 17	1	000004F|arrow.g8532.t1
ec:2.7.11.24 - protein kinase	mTOR signaling pathway	map04150	4	1	000005F|arrow.g3742.t1
ec:1.1.1.41 - dehydrogenase (NAD+)	Citrate cycle (TCA cycle)	map00020	17	1	000003F|arrow.g5724.t1
ec:2.4.2.14 - phosphoribosyldiphosphate 5-amidotransferase	Alanine, aspartate and glutamate metabolism, Purine metabolism	map00250, map00230	24, 49	1	000005F|arrow.g3354.t1
ec:3.2.1.45 - psychosine hydrolase	Sphingolipid metabolism, Other glycan degradation	map00600, map00511	10, 7	1	000001F|arrow.g847.t1
ec:3.1.1.5 - lecithinase B	Glycerophospholipid metabolism	map00564	18	1	000002F|arrow.g2918.t1
ec:1.4.1.3 - dehydrogenase [NAD(P)+]	D-Glutamine and D-glutamate metabolism, Nitrogen metabolism, Alanine, aspartate and glutamate metabolism, Arginine biosynthesis	map00471, map00910, map00250, map00220	3, 13, 24, 16	1	000006F|arrow.g5002.t1
ec:3.2.1.4 - endo-1,4-beta-D-glucanase	Starch and sucrose metabolism	map00500	24	12	000004F|arrow.g9243.t1, 000003F|arrow.g6550.t1, 000006F|arrow.g4509.t1, 000007F|arrow.g10394.t1, 000000F|arrow.g6621.t1, 000002F|arrow.g2588.t1, 000000F|arrow.g7784.t1, 000003F|arrow.g6419.t1, 000004F|arrow.g9700.t1, 000007F|arrow.g9937.t1, 000006F|arrow.g4414.t1, 000007F|arrow.g10145.t1
ec:3.2.1.91 - 1,4-beta-cellobiosidase (non-reducing end)	Starch and sucrose metabolism	map00500	24	1	000005F|arrow.g3867.t1
ec:1.3.1.20 - dehydrogenase	Metabolism of xenobiotics by cytochrome P450	map00980	6	1	000007F|arrow.g10063.t1
ec:6.4.1.2 - carboxylase	Aflatoxin biosynthesis, Fatty acid biosynthesis, Pyruvate metabolism, Carbon fixation pathways in prokaryotes, Propanoate metabolism	map00254, map00061, map00620, map00720, map00640	1, 10, 28, 21, 16	1	000006F|arrow.g5156.t1
ec:1.3.3.3 - oxidase	Porphyrin and chlorophyll metabolism	map00860	15	1	000007F|arrow.g10044.t1
ec:1.14.19.1 - 9-desaturase	Biosynthesis of unsaturated fatty acids	map01040	6	1	000002F|arrow.g1829.t1
ec:2.5.1.75 - dimethylallyltransferase	Zeatin biosynthesis	map00908	1	1	000001F|arrow.g1017.t1
ec:3.4.11.5 - aminopeptidase	Arginine and proline metabolism	map00330	14	1	000001F|arrow.g469.t1
ec:3.1.3.4 - phosphatase	Glycerophospholipid metabolism, Sphingolipid metabolism, Glycerolipid metabolism, Ether lipid metabolism	map00564, map00600, map00561, map00565	18, 10, 13, 4	1	000001F|arrow.g1307.t1
ec:6.3.5.2 - synthase (glutamine-hydrolysing)	Drug metabolism - other enzymes, Purine metabolism	map00983, map00230	16, 49	1	000002F|arrow.g1721.t1
ec:4.1.1.23 - decarboxylase	Pyrimidine metabolism	map00240	24	1	000006F|arrow.g4641.t1
ec:2.7.1.47 - D-ribulokinase (phosphorylating)	Pentose and glucuronate interconversions	map00040	16	1	000001F|arrow.g970.t1
ec:1.1.1.100 - reductase	Biotin metabolism, Fatty acid biosynthesis	map00780, map00061	6, 10	1	000001F|arrow.g119.t1
ec:3.1.3.5 - uridine 5'-nucleotidase	Pyrimidine metabolism, Nicotinate and nicotinamide metabolism, Purine metabolism	map00240, map00760, map00230	24, 12, 49	1	000005F|arrow.g3102.t1
ec:6.4.1.1 - carboxylase	Citrate cycle (TCA cycle), Pyruvate metabolism, Carbon fixation pathways in prokaryotes	map00020, map00620, map00720	17, 28, 21	1	000006F|arrow.g4880.t1
ec:2.7.4.6 - kinase	Pyrimidine metabolism, Drug metabolism - other enzymes, Purine metabolism	map00240, map00983, map00230	24, 16, 49	1	000005F|arrow.g3564.t1
ec:2.4.2.9 - phosphoribosyltransferase	Pyrimidine metabolism	map00240	24	2	000005F|arrow.g3147.t1, 000005F|arrow.g3148.t1
ec:3.5.2.3 - carbamoylaspartic dehydrase	Pyrimidine metabolism	map00240	24	1	000005F|arrow.g3879.t1
ec:1.5.1.2 - reductase	Arginine and proline metabolism	map00330	14	1	000001F|arrow.g1447.t1
ec:7.1.1.8 - reductase	Oxidative phosphorylation	map00190	7	1	000003F|arrow.g5646.t1
ec:1.4.3.3 - oxidase	D-Arginine and D-ornithine metabolism, Arginine and proline metabolism, Penicillin and cephalosporin biosynthesis, Glycine, serine and threonine metabolism	map00472, map00330, map00311, map00260	2, 14, 1, 27	1	000001F|arrow.g665.t1
ec:2.7.1.3 - ketohexokinase (phosphorylating)	Fructose and mannose metabolism	map00051	23	1	000000F|arrow.g7105.t1
ec:6.3.4.13 - ligase	Purine metabolism	map00230	49	1	000003F|arrow.g5870.t1
ec:3.6.1.9 - diphosphatase	Pantothenate and CoA biosynthesis, Pyrimidine metabolism, Nicotinate and nicotinamide metabolism, Starch and sucrose metabolism, Riboflavin metabolism, Purine metabolism	map00770, map00240, map00760, map00500, map00740, map00230	13, 24, 12, 24, 10, 49	6	000006F|arrow.g4662.t1, 000006F|arrow.g4663.t1, 000002F|arrow.g2114.t1, 000002F|arrow.g2828.t1, 000001F|arrow.g696.t1, 000002F|arrow.g2946.t1
ec:1.2.1.31 - dehydrogenase	Lysine degradation	map00310	11	1	000004F|arrow.g9493.t1
ec:3.5.1.49 - ec:3.5.1.49 formamidase	Glyoxylate and dicarboxylate metabolism, Nitrogen metabolism, Cyanoamino acid metabolism	map00630, map00910, map00460	21, 13, 5	1	000001F|arrow.g1063.t1
ec:1.2.1.5 - dehydrogenase [NAD(P)+]	Tyrosine metabolism, Drug metabolism - cytochrome P450, Phenylalanine metabolism, Metabolism of xenobiotics by cytochrome P450, beta-Alanine metabolism, Glycolysis / Gluconeogenesis, Histidine metabolism	map00350, map00982, map00360, map00980, map00410, map00010, map00340	11, 5, 8, 6, 11, 25, 11	1	000005F|arrow.g3685.t1
ec:7.1.2.2 - two-sector ATPase	Oxidative phosphorylation, Photosynthesis	map00190, map00195	7, 1	1	000001F|arrow.g702.t1
ec:5.3.1.9 - isomerase	Pentose phosphate pathway, Amino sugar and nucleotide sugar metabolism, Glycolysis / Gluconeogenesis, Starch and sucrose metabolism	map00030, map00520, map00010, map00500	15, 32, 25, 24	1	000000F|arrow.g7578.t1
ec:2.7.1.59 - kinase	Amino sugar and nucleotide sugar metabolism	map00520	32	1	000006F|arrow.g5146.t1
ec:3.6.1.29 - dinucleosidetriphosphatase	Purine metabolism	map00230	49	1	000002F|arrow.g2946.t1
ec:4.1.1.50 - decarboxylase	Cysteine and methionine metabolism, Arginine and proline metabolism	map00270, map00330	27, 14	1	000005F|arrow.g3585.t1
ec:6.2.1.5 - ligase (ADP-forming)	Citrate cycle (TCA cycle), C5-Branched dibasic acid metabolism, Carbon fixation pathways in prokaryotes, Propanoate metabolism	map00020, map00660, map00720, map00640	17, 4, 21, 16	1	000001F|arrow.g953.t1
ec:4.3.2.1 - lyase	Alanine, aspartate and glutamate metabolism, Arginine biosynthesis	map00250, map00220	24, 16	1	000002F|arrow.g2322.t1
ec:3.5.4.19 - cyclohydrolase	Histidine metabolism	map00340	11	1	000003F|arrow.g5536.t1
ec:3.6.1.11 - metaphosphatase	Purine metabolism	map00230	49	1	000005F|arrow.g4017.t1
ec:1.1.1.205 - dehydrogenase	Drug metabolism - other enzymes, Purine metabolism	map00983, map00230	16, 49	1	000000F|arrow.g6986.t1
ec:2.7.4.7 - kinase	Thiamine metabolism	map00730	11	1	000002F|arrow.g2531.t1
ec:4.3.2.9 - gamma-glutamyl-amino acid cyclotransferase	Glutathione metabolism	map00480	12	1	000002F|arrow.g2148.t1
ec:4.1.1.65 - decarboxylase	Glycerophospholipid metabolism	map00564	18	1	000002F|arrow.g1885.t1
ec:1.13.99.1 - oxygenase	Ascorbate and aldarate metabolism, Inositol phosphate metabolism	map00053, map00562	7, 16	1	000000F|arrow.g7535.t1
ec:2.5.1.58 - farnesyltransferase	Terpenoid backbone biosynthesis	map00900	13	1	000003F|arrow.g5505.t1
ec:4.2.1.109 - 1-phosphate dehydratase	Cysteine and methionine metabolism	map00270	27	1	000000F|arrow.g8097.t1
ec:1.3.1.72 - reductase	Steroid biosynthesis	map00100	8	1	000003F|arrow.g6157.t1
ec:2.6.1.52 - transaminase	Cysteine and methionine metabolism, Vitamin B6 metabolism, Methane metabolism, Glycine, serine and threonine metabolism	map00270, map00750, map00680, map00260	27, 4, 16, 27	1	000002F|arrow.g2985.t1
ec:3.2.1.18 - neuraminidase	Sphingolipid metabolism, Other glycan degradation	map00600, map00511	10, 7	1	000006F|arrow.g4376.t1
ec:1.13.11.20 - dioxygenase	Cysteine and methionine metabolism, Taurine and hypotaurine metabolism	map00270, map00430	27, 5	1	000001F|arrow.g1498.t1
ec:3.5.4.10 - cyclohydrolase	Purine metabolism	map00230	49	1	000006F|arrow.g4882.t1
ec:2.7.1.4 - fructokinase (phosphorylating)	Amino sugar and nucleotide sugar metabolism, Starch and sucrose metabolism, Fructose and mannose metabolism	map00520, map00500, map00051	32, 24, 23	1	000005F|arrow.g3204.t1
ec:2.1.3.2 - carbamoyltransferase	Pyrimidine metabolism, Alanine, aspartate and glutamate metabolism	map00240, map00250	24, 24	1	000006F|arrow.g4464.t1
ec:4.2.3.4 - synthase	Phenylalanine, tyrosine and tryptophan biosynthesis	map00400	19	1	000003F|arrow.g5619.t1
ec:3.1.2.22 - hydrolase	Fatty acid elongation	map00062	7	1	000004F|arrow.g8801.t1
ec:1.1.2.4 - dehydrogenase (cytochrome)	Pyruvate metabolism	map00620	28	1	000002F|arrow.g2129.t1
ec:2.7.1.67 - 4-kinase	Inositol phosphate metabolism, Phosphatidylinositol signaling system	map00562, map04070	16, 16	1	000002F|arrow.g2747.t1
ec:2.7.1.22 - kinase	Nicotinate and nicotinamide metabolism	map00760	12	1	000004F|arrow.g9463.t1
ec:2.4.1.265 - alpha-1,3-glucosyltransferase	N-Glycan biosynthesis	map00510	21	1	000007F|arrow.g9917.t1
ec:2.7.8.7 - synthase	Pantothenate and CoA biosynthesis	map00770	13	1	000001F|arrow.g337.t1
ec:6.3.2.3 - synthase	Cysteine and methionine metabolism, Glutathione metabolism	map00270, map00480	27, 12	1	000002F|arrow.g2004.t1
ec:4.1.3.1 - lyase	Glyoxylate and dicarboxylate metabolism	map00630	21	3	000000F|arrow.g8166.t1, 000005F|arrow.g3267.t1, 000005F|arrow.g3268.t1
ec:2.7.1.7 - mannokinase (phosphorylating)	Amino sugar and nucleotide sugar metabolism, Fructose and mannose metabolism	map00520, map00051	32, 23	1	000005F|arrow.g3204.t1
ec:1.1.1.21 - reductase	Galactose metabolism, Glycerolipid metabolism, Folate biosynthesis, Pentose and glucuronate interconversions, Fructose and mannose metabolism	map00052, map00561, map00790, map00040, map00051	17, 13, 19, 16, 23	1	000003F|arrow.g5230.t1
ec:1.14.13.9 - 3-monooxygenase	Tryptophan metabolism	map00380	17	1	000004F|arrow.g9765.t1
ec:1.2.1.41 - dehydrogenase	Carbapenem biosynthesis, Arginine and proline metabolism	map00332, map00330	2, 14	1	000003F|arrow.g5992.t1
ec:2.7.7.53 - adenylyltransferase	Purine metabolism	map00230	49	1	000005F|arrow.g3800.t1
ec:4.2.1.90 - dehydratase	Fructose and mannose metabolism	map00051	23	1	000000F|arrow.g7680.t1
ec:3.1.3.46 - 2-phosphatase	Fructose and mannose metabolism	map00051	23	1	000004F|arrow.g8632.t1
ec:5.3.1.24 - isomerase	Phenylalanine, tyrosine and tryptophan biosynthesis	map00400	19	1	000003F|arrow.g5687.t1
ec:3.2.1.67 - 1,4-alpha-galacturonidase	Pentose and glucuronate interconversions	map00040	16	1	000002F|arrow.g2420.t1
ec:2.3.1.199 - 3-oxoacyl-CoA synthase	Fatty acid elongation, Biosynthesis of unsaturated fatty acids	map00062, map01040	7, 6	1	000002F|arrow.g1870.t1
ec:2.7.1.40 - kinase	Pyruvate metabolism, Glycolysis / Gluconeogenesis, Purine metabolism	map00620, map00010, map00230	28, 25, 49	1	000004F|arrow.g9778.t1
ec:1.1.1.34 - reductase (NADPH)	Terpenoid backbone biosynthesis	map00900	13	1	000005F|arrow.g4243.t1
ec:1.3.1.13 - dehydrogenase (NADP+)	Phenylalanine, tyrosine and tryptophan biosynthesis	map00400	19	1	000002F|arrow.g2505.t1
ec:4.4.1.17 - synthase	Porphyrin and chlorophyll metabolism	map00860	15	1	000001F|arrow.g961.t1
ec:2.5.1.19 - 1-carboxyvinyltransferase	Phenylalanine, tyrosine and tryptophan biosynthesis	map00400	19	1	000003F|arrow.g5619.t1
ec:1.6.5.2 - dehydrogenase (quinone)	Ubiquinone and other terpenoid-quinone biosynthesis	map00130	6	14	000004F|arrow.g9409.t1, 000001F|arrow.g46.t1, 000004F|arrow.g9476.t1, 000005F|arrow.g3656.t1, 000007F|arrow.g10056.t1, 000002F|arrow.g2143.t1, 000002F|arrow.g1879.t1, 000002F|arrow.g2013.t1, 000006F|arrow.g4528.t1, 000004F|arrow.g9093.t1, 000006F|arrow.g4527.t1, 000004F|arrow.g8901.t1, 000000F|arrow.g8135.t1, 000004F|arrow.g8900.t1
ec:4.1.1.37 - decarboxylase	Porphyrin and chlorophyll metabolism	map00860	15	1	000001F|arrow.g743.t1
ec:3.5.1.4 - acylamidase	Styrene degradation, Aminobenzoate degradation, Phenylalanine metabolism, Arginine and proline metabolism, Tryptophan metabolism	map00643, map00627, map00360, map00330, map00380	3, 6, 8, 14, 17	1	000001F|arrow.g1222.t1
ec:1.5.1.7 - dehydrogenase (NAD+, L-lysine-forming)	Lysine degradation, Lysine biosynthesis	map00310, map00300	11, 5	1	000000F|arrow.g7271.t1
ec:1.5.1.5 - dehydrogenase (NADP+)	Carbon fixation pathways in prokaryotes, One carbon pool by folate	map00720, map00670	21, 12	1	000002F|arrow.g2417.t1
ec:2.4.2.8 - phosphoribosyltransferase	Drug metabolism - other enzymes, Purine metabolism	map00983, map00230	16, 49	1	000001F|arrow.g956.t1
ec:4.1.1.28 - decarboxylase	Tyrosine metabolism, Betalain biosynthesis, Phenylalanine metabolism, Isoquinoline alkaloid biosynthesis, Tryptophan metabolism	map00350, map00965, map00360, map00950, map00380	11, 2, 8, 4, 17	1	000006F|arrow.g5176.t1
ec:5.4.2.8 - mannose phosphomutase	Amino sugar and nucleotide sugar metabolism, O-Antigen nucleotide sugar biosynthesis, Fructose and mannose metabolism	map00520, map00541, map00051	32, 7, 23	1	000001F|arrow.g956.t1
ec:2.7.7.13 - guanylyltransferase	Amino sugar and nucleotide sugar metabolism, O-Antigen nucleotide sugar biosynthesis, Fructose and mannose metabolism	map00520, map00541, map00051	32, 7, 23	1	000001F|arrow.g1266.t1
ec:2.5.1.6 - adenosyltransferase	Cysteine and methionine metabolism	map00270	27	1	000005F|arrow.g3931.t1
ec:2.7.4.22 - kinase	Pyrimidine metabolism	map00240	24	1	000000F|arrow.g7717.t1
ec:3.7.1.3 - ec:3.7.1.3 kynureninase	Tryptophan metabolism	map00380	17	1	000003F|arrow.g5430.t1
ec:4.1.1.46 - decarboxylase	Aminobenzoate degradation, Benzoate degradation	map00627, map00362	6, 7	1	000004F|arrow.g8630.t1
ec:3.1.3.18 - phosphatase	Glyoxylate and dicarboxylate metabolism	map00630	21	1	000003F|arrow.g6403.t1
ec:4.2.1.20 - synthase	Phenylalanine, tyrosine and tryptophan biosynthesis, Glycine, serine and threonine metabolism	map00400, map00260	19, 27	1	000002F|arrow.g2760.t1
ec:2.4.2.17 - phosphoribosyltransferase	Histidine metabolism	map00340	11	1	000000F|arrow.g7663.t1
ec:2.7.1.50 - kinase	Thiamine metabolism	map00730	11	1	000000F|arrow.g6635.t1
ec:1.3.1.9 - reductase (NADH)	Fatty acid biosynthesis	map00061	10	1	000000F|arrow.g7745.t1
ec:2.7.8.5 - 1-phosphatidyltransferase	Glycerophospholipid metabolism	map00564	18	1	000002F|arrow.g2014.t1
ec:3.6.1.15 - phosphatase	Thiamine metabolism, Purine metabolism	map00730, map00230	11, 49	357	000000F|arrow.g8083.t1, 000004F|arrow.g8869.t1, 000006F|arrow.g4309.t1, 000004F|arrow.g8846.t1, 000004F|arrow.g8817.t1, 000004F|arrow.g9604.t1, 000004F|arrow.g8789.t1, 000002F|arrow.g2895.t1, 000003F|arrow.g6118.t1, 000002F|arrow.g2115.t1, 000002F|arrow.g2654.t1, 000006F|arrow.g4533.t1, 000003F|arrow.g6227.t1, 000002F|arrow.g2006.t1, 000001F|arrow.g27.t1, 000003F|arrow.g6313.t1, 000003F|arrow.g63…
ec:6.2.1.2 - acyl-CoA ligase	Butanoate metabolism	map00650	19	1	000001F|arrow.g1129.t1
ec:2.1.1.201 - methylase	Ubiquinone and other terpenoid-quinone biosynthesis	map00130	6	1	000004F|arrow.g8911.t1
ec:4.1.1.48 - synthase	Phenylalanine, tyrosine and tryptophan biosynthesis	map00400	19	1	000003F|arrow.g5687.t1
ec:3.2.1.55 - end alpha-L-arabinofuranosidase	Amino sugar and nucleotide sugar metabolism	map00520	32	1	000002F|arrow.g3035.t1
ec:2.3.1.16 - C-acyltransferase	Fatty acid elongation, Ethylbenzene degradation, Fatty acid degradation, Geraniol degradation, Biosynthesis of unsaturated fatty acids, alpha-Linolenic acid metabolism, Benzoate degradation, Valine, leucine and isoleucine degradation	map00062, map00642, map00071, map00281, map01040, map00592, map00362, map00280	7, 1, 10, 4, 6, 4, 7, 16	1	000002F|arrow.g2602.t1
ec:4.1.3.30 - lyase	Propanoate metabolism	map00640	16	1	000005F|arrow.g3267.t1
ec:1.13.11.60 - 8R-lipoxygenase	Linoleic acid metabolism	map00591	2	1	000001F|arrow.g138.t1
ec:2.6.1.51 - transaminase	Glycine, serine and threonine metabolism	map00260	27	1	000004F|arrow.g9195.t1
ec:2.7.1.25 - kinase	Sulfur metabolism, Purine metabolism	map00920, map00230	8, 49	1	000005F|arrow.g3952.t1
ec:4.2.1.3 - hydratase	Citrate cycle (TCA cycle), Carbon fixation pathways in prokaryotes, Glyoxylate and dicarboxylate metabolism	map00020, map00720, map00630	17, 21, 21	1	000000F|arrow.g7857.t1
ec:4.2.1.2 - hydratase	Citrate cycle (TCA cycle), Pyruvate metabolism, Carbon fixation pathways in prokaryotes	map00020, map00620, map00720	17, 28, 21	1	000005F|arrow.g3222.t1
ec:6.1.1.9 - ligase	Aminoacyl-tRNA biosynthesis	map00970	22	1	000005F|arrow.g3780.t1
ec:1.1.1.282 - dehydrogenase	Phenylalanine, tyrosine and tryptophan biosynthesis	map00400	19	1	000005F|arrow.g4030.t1
ec:1.2.1.27 - dehydrogenase (CoA-acylating)	Propanoate metabolism, Valine, leucine and isoleucine degradation	map00640, map00280	16, 16	1	000005F|arrow.g3146.t1
ec:6.2.1.3 - ligase	Fatty acid biosynthesis, Fatty acid degradation	map00061, map00071	10, 10	1	000001F|arrow.g1129.t1
ec:2.3.1.5 - N-acetyltransferase	Caffeine metabolism, Drug metabolism - other enzymes, Nitrotoluene degradation	map00232, map00983, map00633	4, 16, 1	1	000001F|arrow.g1101.t1
ec:6.1.1.10 - ligase	Selenocompound metabolism, Aminoacyl-tRNA biosynthesis	map00450, map00970	6, 22	1	000006F|arrow.g4861.t1
ec:4.1.2.5 - aldolase	Glycine, serine and threonine metabolism	map00260	27	1	000001F|arrow.g468.t1
ec:2.4.2.28 - phosphorylase	Cysteine and methionine metabolism	map00270	27	1	000004F|arrow.g8888.t1
ec:3.5.4.3 - deaminase	Purine metabolism	map00230	49	1	000001F|arrow.g661.t1
ec:2.8.1.7 - desulfurase	Thiamine metabolism	map00730	11	1	000000F|arrow.g8403.t1
ec:1.3.99.5 - 4-dehydrogenase (acceptor)	Steroid degradation	map00984	2	1	000000F|arrow.g8010.t1
ec:6.1.1.21 - ligase	Aminoacyl-tRNA biosynthesis	map00970	22	1	000000F|arrow.g8083.t1
ec:2.3.1.23 - O-acyltransferase	Glycerophospholipid metabolism	map00564	18	1	000003F|arrow.g5883.t1
ec:2.3.3.10 - synthase	Terpenoid backbone biosynthesis, Synthesis and degradation of ketone bodies, Butanoate metabolism, Valine, leucine and isoleucine degradation	map00900, map00072, map00650, map00280	13, 4, 19, 16	1	000000F|arrow.g7401.t1
ec:1.8.4.8 - reductase (thioredoxin)	Sulfur metabolism	map00920	8	1	000007F|arrow.g10319.t1
ec:3.5.4.4 - deaminase	Purine metabolism	map00230	49	1	000001F|arrow.g744.t1
ec:1.4.1.14 - synthase (NADH)	Nitrogen metabolism, Alanine, aspartate and glutamate metabolism	map00910, map00250	13, 24	1	000007F|arrow.g10038.t1
ec:3.5.3.1 - arginine amidinase	Arginine and proline metabolism, Arginine biosynthesis	map00330, map00220	14, 16	1	000000F|arrow.g7308.t1
ec:3.2.1.25 - mannanase	Other glycan degradation	map00511	7	1	000001F|arrow.g856.t1
ec:1.1.1.31 - dehydrogenase	Valine, leucine and isoleucine degradation	map00280	16	1	000001F|arrow.g372.t1
ec:2.7.11.11 - protein kinase	mTOR signaling pathway	map04150	4	1	000002F|arrow.g2897.t1
ec:3.6.1.13 - diphosphatase	Purine metabolism	map00230	49	1	000005F|arrow.g4124.t1
ec:4.2.1.96 - dehydratase	Folate biosynthesis	map00790	19	1	000001F|arrow.g556.t1
ec:3.2.1.1 - glycogenase	Starch and sucrose metabolism	map00500	24	1	000002F|arrow.g2283.t1
ec:2.4.1.141 - N-acetylglucosaminyltransferase	N-Glycan biosynthesis, Various types of N-glycan biosynthesis	map00510, map00513	21, 12	1	000000F|arrow.g8154.t1
ec:3.5.2.2 - hydantoinase	Pantothenate and CoA biosynthesis, Pyrimidine metabolism, Drug metabolism - other enzymes, beta-Alanine metabolism	map00770, map00240, map00983, map00410	13, 24, 16, 11	1	000007F|arrow.g9939.t1
ec:1.1.1.83 - dehydrogenase (decarboxylating)	Butanoate metabolism	map00650	19	1	000002F|arrow.g2252.t1
ec:2.5.1.49 - aminocarboxypropyltransferase	Cysteine and methionine metabolism	map00270	27	1	000005F|arrow.g3643.t1
ec:2.7.7.9 - uridylyltransferase	Amino sugar and nucleotide sugar metabolism, O-Antigen nucleotide sugar biosynthesis, Galactose metabolism, Glycerolipid metabolism, Starch and sucrose metabolism, Pentose and glucuronate interconversions	map00520, map00541, map00052, map00561, map00500, map00040	32, 7, 17, 13, 24, 16	1	000002F|arrow.g2207.t1
ec:2.1.1.114 - methyltransferase	Ubiquinone and other terpenoid-quinone biosynthesis	map00130	6	1	000003F|arrow.g5509.t1
ec:5.3.3.5 - Delta-isomerase	Steroid biosynthesis	map00100	8	1	000001F|arrow.g672.t1
ec:1.1.1.37 - dehydrogenase	Cysteine and methionine metabolism, Citrate cycle (TCA cycle), Pyruvate metabolism, Carbon fixation pathways in prokaryotes, Glyoxylate and dicarboxylate metabolism, Carbon fixation in photosynthetic organisms, Methane metabolism	map00270, map00020, map00620, map00720, map00630, map00710, map00680	27, 17, 28, 21, 21, 14, 16	1	000001F|arrow.g1002.t1
ec:2.7.2.8 - kinase	Arginine biosynthesis	map00220	16	1	000005F|arrow.g3271.t1
ec:3.1.3.16 - phosphatase	Th1 and Th2 cell differentiation, PD-L1 expression and PD-1 checkpoint pathway in cancer, T cell receptor signaling pathway	map04658, map05235, map04660	1, 1, 1	1	000001F|arrow.g176.t1
ec:1.14.14.17 - monooxygenase	Sesquiterpenoid and triterpenoid biosynthesis, Steroid biosynthesis	map00909, map00100	2, 8	1	000005F|arrow.g4198.t1
ec:1.1.1.270 - 3-dehydrogenase	Steroid biosynthesis	map00100	8	1	000007F|arrow.g10309.t1
ec:2.7.7.64 - uridylyltransferase	Amino sugar and nucleotide sugar metabolism, Ascorbate and aldarate metabolism, Galactose metabolism, Pentose and glucuronate interconversions	map00520, map00053, map00052, map00040	32, 7, 17, 16	1	000002F|arrow.g2207.t1
ec:2.4.1.16 - synthase	Amino sugar and nucleotide sugar metabolism	map00520	32	1	000001F|arrow.g1090.t1
ec:1.5.1.41 - reductase [NAD(P)H]	Riboflavin metabolism	map00740	10	1	000001F|arrow.g250.t1
ec:1.7.1.4 - reductase [NAD(P)H]	Nitrogen metabolism	map00910	13	1	000003F|arrow.g5716.t1
ec:4.2.1.10 - dehydratase	Phenylalanine, tyrosine and tryptophan biosynthesis	map00400	19	1	000005F|arrow.g4034.t1
ec:3.6.1.6 - diphosphate phosphatase	Pyrimidine metabolism, Purine metabolism	map00240, map00230	24, 49	1	000003F|arrow.g6303.t1
ec:2.6.1.85 - synthase	Folate biosynthesis	map00790	19	1	000003F|arrow.g5878.t1
ec:4.1.1.5 - decarboxylase	C5-Branched dibasic acid metabolism, Butanoate metabolism	map00660, map00650	4, 19	1	000005F|arrow.g3496.t1
ec:1.4.3.5 - 5'-phosphate synthase	Vitamin B6 metabolism	map00750	4	1	000003F|arrow.g6242.t1
ec:2.4.99.18 - glycotransferase	N-Glycan biosynthesis, Various types of N-glycan biosynthesis	map00510, map00513	21, 12	1	000005F|arrow.g3723.t1
ec:1.1.1.79 - reductase (NADP+)	Pyruvate metabolism, Glyoxylate and dicarboxylate metabolism	map00620, map00630	28, 21	1	000005F|arrow.g3458.t1
ec:2.3.3.14 - synthase	Pyruvate metabolism, Lysine biosynthesis	map00620, map00300	28, 5	1	000003F|arrow.g5291.t1
ec:2.3.3.9 - synthase	Pyruvate metabolism, Glyoxylate and dicarboxylate metabolism	map00620, map00630	28, 21	1	000005F|arrow.g3309.t1
ec:1.3.3.6 - oxidase	beta-Alanine metabolism, Fatty acid degradation, Propanoate metabolism, Biosynthesis of unsaturated fatty acids, alpha-Linolenic acid metabolism	map00410, map00071, map00640, map01040, map00592	11, 10, 16, 6, 4	1	000002F|arrow.g1625.t1
ec:2.7.7.75 - adenylyltransferase	Folate biosynthesis	map00790	19	1	000001F|arrow.g571.t1
ec:2.4.1.15 - synthase (UDP-forming)	Starch and sucrose metabolism	map00500	24	1	000000F|arrow.g7189.t1
ec:3.1.3.64 - inositol-1,3-bisphosphate 3-phosphatase	Inositol phosphate metabolism, Phosphatidylinositol signaling system	map00562, map04070	16, 16	1	000000F|arrow.g7992.t1
ec:2.7.1.35 - kinase	Vitamin B6 metabolism	map00750	4	1	000001F|arrow.g695.t1
ec:1.17.3.2 - oxidase	Caffeine metabolism, Drug metabolism - other enzymes, Purine metabolism	map00232, map00983, map00230	4, 16, 49	1	000004F|arrow.g9491.t1
ec:6.3.5.7 - synthase (glutamine-hydrolysing)	Aminoacyl-tRNA biosynthesis	map00970	22	1	000000F|arrow.g7307.t1
ec:2.6.1.9 - transaminase	Tyrosine metabolism, Phenylalanine metabolism, Phenylalanine, tyrosine and tryptophan biosynthesis, Tropane, piperidine and pyridine alkaloid biosynthesis, Histidine metabolism, Novobiocin biosynthesis	map00350, map00360, map00400, map00960, map00340, map00401	11, 8, 19, 3, 11, 3	1	000003F|arrow.g5590.t1
ec:1.8.1.9 - reductase	Selenocompound metabolism	map00450	6	1	000000F|arrow.g8112.t1
ec:2.4.1.261 - alpha-1,2-mannosyltransferase	N-Glycan biosynthesis, Various types of N-glycan biosynthesis	map00510, map00513	21, 12	1	000003F|arrow.g5610.t1
ec:2.7.6.1 - diphosphokinase	Pentose phosphate pathway, Purine metabolism	map00030, map00230	15, 49	1	000004F|arrow.g8644.t1
ec:4.4.1.22 - synthase	Methane metabolism	map00680	16	2	000006F|arrow.g4363.t1, 000006F|arrow.g4362.t1
ec:1.5.1.30 - reductase (NADPH)	Riboflavin metabolism	map00740	10	1	000001F|arrow.g250.t1
ec:4.1.2.25 - aldolase	Folate biosynthesis	map00790	19	1	000000F|arrow.g7470.t1
ec:6.1.1.19 - ligase	Aminoacyl-tRNA biosynthesis	map00970	22	1	000002F|arrow.g2654.t1
ec:1.7.1.3 - reductase (NADPH)	Nitrogen metabolism	map00910	13	1	000003F|arrow.g5717.t1
ec:5.4.99.7 - synthase	Steroid biosynthesis	map00100	8	3	000005F|arrow.g3625.t1, 000005F|arrow.g3626.t1, 000000F|arrow.g6753.t1
ec:1.13.11.27 - dioxygenase	Tyrosine metabolism, Phenylalanine metabolism, Ubiquinone and other terpenoid-quinone biosynthesis	map00350, map00360, map00130	11, 8, 6	1	000001F|arrow.g1276.t1
ec:1.1.1.86 - reductoisomerase (NADP+)	Pantothenate and CoA biosynthesis, Valine, leucine and isoleucine biosynthesis	map00770, map00290	13, 8	1	000000F|arrow.g8431.t1
ec:6.3.3.3 - synthase	Biotin metabolism	map00780	6	1	000005F|arrow.g3337.t1
ec:1.1.1.25 - dehydrogenase	Phenylalanine, tyrosine and tryptophan biosynthesis	map00400	19	1	000005F|arrow.g4030.t1
ec:3.2.1.48 - alpha-glucosidase	Starch and sucrose metabolism	map00500	24	1	000002F|arrow.g2283.t1
ec:3.5.1.10 - deformylase	Glyoxylate and dicarboxylate metabolism, One carbon pool by folate	map00630, map00670	21, 12	1	000006F|arrow.g4412.t1
ec:6.1.1.3 - ligase	Aminoacyl-tRNA biosynthesis	map00970	22	1	000006F|arrow.g4615.t1
ec:3.2.1.106 - glucosidase	N-Glycan biosynthesis	map00510	21	1	000002F|arrow.g2877.t1
ec:3.6.1.31 - diphosphatase	Histidine metabolism	map00340	11	1	000003F|arrow.g5536.t1
ec:2.1.2.9 - formyltransferase	Aminoacyl-tRNA biosynthesis, One carbon pool by folate	map00970, map00670	22, 12	1	000000F|arrow.g7837.t1
ec:6.1.1.16 - ligase	Aminoacyl-tRNA biosynthesis	map00970	22	1	000005F|arrow.g4132.t1
ec:2.7.1.48 - kinase	Pyrimidine metabolism, Drug metabolism - other enzymes	map00240, map00983	24, 16	2	000004F|arrow.g8995.t1, 000004F|arrow.g8994.t1
ec:4.1.2.8 - lyase	Benzoxazinoid biosynthesis	map00402	1	1	000003F|arrow.g5687.t1
ec:3.1.3.36 - 5-phosphatase	Inositol phosphate metabolism, Phosphatidylinositol signaling system	map00562, map04070	16, 16	1	000003F|arrow.g6000.t1
ec:3.1.3.15 - histidinol phosphate phosphatase	Histidine metabolism	map00340	11	1	000001F|arrow.g338.t1
ec:3.2.1.3 - 1,4-alpha-glucosidase	Starch and sucrose metabolism	map00500	24	1	000001F|arrow.g1338.t1
ec:3.2.1.58 - 1,3-beta-glucosidase	Starch and sucrose metabolism	map00500	24	1	000004F|arrow.g8955.t1
ec:6.2.1.16 - ligase	Butanoate metabolism, Valine, leucine and isoleucine degradation	map00650, map00280	19, 16	1	000001F|arrow.g22.t1
ec:3.1.1.1 - ali-esterase	Drug metabolism - other enzymes	map00983	16	1	000001F|arrow.g11.t1
ec:2.3.1.41 - synthase I	Biotin metabolism, Fatty acid biosynthesis	map00780, map00061	6, 10	1	000001F|arrow.g1112.t1
ec:2.7.1.28 - triose kinase	Fructose and mannose metabolism	map00051	23	1	000001F|arrow.g98.t1
ec:5.3.1.6 - isomerase	Pentose phosphate pathway, Carbon fixation in photosynthetic organisms, Fructose and mannose metabolism	map00030, map00710, map00051	15, 14, 23	1	000001F|arrow.g627.t1
ec:1.1.1.12 - 4-dehydrogenase	Pentose and glucuronate interconversions	map00040	16	1	000006F|arrow.g4607.t1
ec:1.1.1.85 - dehydrogenase	C5-Branched dibasic acid metabolism, Valine, leucine and isoleucine biosynthesis	map00660, map00290	4, 8	1	000006F|arrow.g4646.t1
ec:3.2.1.14 - ChiC	Amino sugar and nucleotide sugar metabolism	map00520	32	1	000001F|arrow.g44.t1

## Sheet: analyses
	KEGG Pathway Classification (Aspergillus sp. MEXU 27854)
	Metabolism	Aminoacid biosynthesis and metabolism	169
		Biosynthesis of other secondary metabolites	19
		Carbohydrate metabolism	39
		Energy metabolism	119
		Global and overview maps	53
		Glycan biosynthesis and metabolism	94
		Lipid metabolism	72
		Metabolism of cofactors and vitamins	130
		Metabolism of terpenoids and polyketides	14
		Nucleotid metabolism	418
		Xenobiotics biodegradation and metabolism	42
	Genetic Information Processing	Replication and repair	51
		Transcription	1
		Translation	21
	Enviromental Information Processing	Signalig molecules and interaction	17
		Signal trasduction	12
	Cellular Process	Cell growth and death	20
		Cell motility	12
		Transpor and catabolism	7
